# Supplementary material
Source: PubMed Central journal article supplement (PMC3278535)

## Supporting Information For

# Application of a Sequential Multicomponent Assembly Process/Huisgen Cycloaddition Strategy to the Preparation of Libraries of 1,2,3-Triazole-Fused 1,4-Benzodiazepines

James R. Donald, Rebekah R. Wood and Stephen F. Martin\*

*Department of Chemistry and Biochemistry and  
The Texas Institute for Drug and Diagnostic Development  
The University of Texas, Austin, Texas 78712*

[sfmartin@mail.utexas.edu](mailto:sfmartin@mail.utexas.edu)

### Table of Contents:

|                                                    |          |
|----------------------------------------------------|----------|
| General Experimental Methods                       | S2-S3    |
| Experimental Procedures and Characterization Data  | S3-S38   |
| Lipinski Data                                      | S38-S40  |
| References                                         | S40      |
| <sup>1</sup> H NMR and <sup>13</sup> C NMR Spectra | S41-S267 |

## Experimental Section

**General methods.** Unless otherwise noted, solvents and reagents were reagent-grade and used without further purification. Acetonitrile (CH<sub>3</sub>CN), dimethylformamide (DMF), tetrahydrofuran (THF) and toluene were dried according to the procedure described by Grubbs.<sup>1</sup> Dichloromethane (CH<sub>2</sub>Cl<sub>2</sub>), pyridine and triethylamine were distilled from CaH<sub>2</sub>. 1,2-Dichloroethane (DCE) was dried with, and stored over activated ball-type 4 Å molecular sieves. Where required, solvents were degassed by sparging with nitrogen for 20 min prior to use. Molecular sieves were activated by heating (*ca.* 250 °C) under high vacuum (*ca.* 0.5 mmHg) for at least 6 h prior to use. Zinc granules were activated by stirring with aqueous HCl (1.0 M) for 10 min, then filtered, rinsed with H<sub>2</sub>O, MeOH, then Et<sub>2</sub>O, and dried under high vacuum (*ca.* 0.5 mmHg) before use. Zinc chloride was fused under high vacuum (*ca.* 0.5 mmHg) prior to use. Reactions were performed under a nitrogen or argon atmosphere in round-bottom flasks sealed under rubber septa with magnetic stirring, unless otherwise noted. Water sensitive reactions were performed with oven-dried glassware and stir bars. Sensitive reagents and solvents were transferred using plastic syringes and oven-dried steel needles using standard techniques. Reaction temperatures are reported as the temperatures of the bath surrounding the vessel.

Nuclear magnetic resonance spectra were acquired at room temperature in CDCl<sub>3</sub> unless otherwise noted. Chemical shifts are reported in parts per million (ppm,  $\delta$ ), downfield from tetramethylsilane (TMS,  $\delta$  = 0.00 ppm) and are referenced to either TMS or the residual solvent: CDCl<sub>3</sub>,  $\delta$  = 7.26 ppm (<sup>1</sup>H) and 77.16 ppm (<sup>13</sup>C); d<sub>6</sub>-DMSO,  $\delta$  = 2.50 ppm (<sup>1</sup>H) and 39.5 ppm (<sup>13</sup>C); CD<sub>3</sub>CN,  $\delta$  = 1.94 ppm (<sup>1</sup>H) and 1.32 (CD<sub>3</sub>CN) ppm (<sup>13</sup>C).<sup>2</sup> The abbreviations s, d, t, q, m and comp stand for the resonance multiplicities singlet, doublet, triplet, quartet, multiplet, and complex (overlapping multiplets of magnetically nonequivalent protons), respectively. Br = broad; app = apparent. Infrared (IR) spectra were recorded as films on sodium chloride plates and reported as wavenumbers (cm<sup>-1</sup>). Thin-layer chromatography was performed on Merck Kieselgel 60 F254 silica gel plates eluting with the solvents indicated, visualized by 254 nm UV lamp, and stained with 100 basic KMnO<sub>4</sub> solution or *para*-anisaldehyde. Flash chromatography was performed with Silicycle pharmaceutical grade silica gel (Silicycle F60, particle size 43-60  $\mu$ m).<sup>3</sup> Purity was determined using an LCMS system comprised of an Agilent 1200 Series HPLC and an Agilent 6130 single quadrupole mass spectrometer. Samples were injected onto a Phenomenex Gemini C18 column (5 micron, 2.1 x 50 mm) and eluted at 0.7 ml/min using a gradient of 10-90% acetonitrile, 0.1% formic acid (11 minute linear ramp). Positive mode

electrospray ionization was used to verify the identity of the major component, and a UV chromatogram recorded at 214 nm was integrated to determine compound purity.

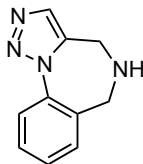

6

**5,6-Dihydro-4H-benzo[f][1,2,3]triazolo[1,5-a][1,4]diazepine (6).** A mixture of 2-azidobenzaldehyde (**4**) (3.10 g, 21.1 mmol),<sup>4</sup> propargylamine (1.74 g, 2.02 mL, 31.6 mmol), sodium triacetoxyborohydride (8.93 g, 42.1 mmol) and glacial acetic acid (1.27 g, 1.20 mL, 21.1 mmol) in DCE (62 mL) was stirred at room temperature for 3 h. The reaction was diluted with CH<sub>2</sub>Cl<sub>2</sub> (150 mL) and saturated aqueous NaHCO<sub>3</sub> (150 mL), and the layers were separated. The aqueous layer was extracted with CH<sub>2</sub>Cl<sub>2</sub> (2 × 80 mL), and the combined organic layers were concentrated under reduced pressure. The residue was dissolved in Et<sub>2</sub>O (80 mL), and the solution was extracted with aqueous HCl (3 × 40 mL, 1.0 M). The combined aqueous extracts were washed with Et<sub>2</sub>O (80 mL). The pH of the aqueous layer was then raised to ~ 11-12 by adding aqueous NaOH (1.0 M), and the resulting suspension was extracted with Et<sub>2</sub>O (3 × 80 mL). The combined organic extracts were dried (MgSO<sub>4</sub>) and concentrated under reduced pressure and the residue was dissolved in toluene (60 mL), and heated at 100 °C for 4.5 h. The cooled reaction was concentrated under reduced pressure, and the residue was purified by recrystallization from hexanes/EtOAc to give 2.57 g (66%) of amine **6** as pale yellow prisms: mp 120-122 °C (lit.<sup>5</sup> 124-125 °C, Et<sub>2</sub>O); <sup>1</sup>H NMR (400 MHz) δ 7.97 (d, *J* = 7.9 Hz, 1 H), 7.72 (s, 1 H), 7.54 (m, 1 H), 7.49-7.40 (comp, 2 H), 4.03 (s, 2 H), 3.82 (s, 2 H), 2.10 (br s, 1 H). All spectroscopic data were consistent with those reported in the literature.<sup>5</sup> LCMS purity 97%

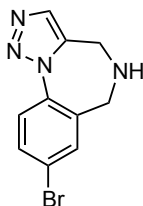

7

**8-Bromo-5,6-dihydro-4H-benzo[f][1,2,3]triazolo[1,5-a][1,4]diazepine (7).** A mixture of 2-azido-5-bromobenzaldehyde (**5**) (5.00 g, 22.1 mmol),<sup>6</sup> propargylamine (1.83 g, 2.13 mL, 33.2 mmol), sodium triacetoxyborohydride (9.38 g, 44.2 mmol) and glacial acetic acid (1.33 g, 1.27 mL, 22.1 mmol) in DCE (100 mL) was stirred at room temperature for 2.5 h. The reaction was diluted with CH<sub>2</sub>Cl<sub>2</sub> (200

mL) and saturated aqueous NaHCO<sub>3</sub> (200 mL), and the layers were separated. The aqueous layer was extracted with CH<sub>2</sub>Cl<sub>2</sub> (2 × 100 mL), and the combined organic layers were concentrated under reduced pressure. The residue was dissolved in Et<sub>2</sub>O (300 mL), and the solution was extracted with aqueous HCl (3 × 150 mL, 1.0 M). The pH of the combined aqueous extracts was then raised to ~ 11-12 by adding aqueous NaOH (1.0 M). The resulting suspension was extracted with Et<sub>2</sub>O (4 × 100 mL), and the combined organic extracts were dried (MgSO<sub>4</sub>) and concentrated under reduced pressure. The residue was dissolved in toluene (120 mL) and the solution heated at 100 °C for 4.5 h. The cooled reaction was concentrated under reduced pressure, and the residue was purified by recrystallization from *i*-PrOH to give 4.50 g (77%) of amine **7** as pale brown plates: mp 139-141 °C; <sup>1</sup>H NMR (300 MHz) δ 7.83 (d, *J* = 8.7 Hz, 1 H), 7.68 (s, 1 H), 7.64 (dd, *J* = 8.7, 2.0 Hz, 1 H), 7.56 (d, *J* = 2.0 Hz, 1 H), 4.06 (s, 2 H), 3.80 (s, 2 H), 2.26 (s, 1 H); <sup>13</sup>C NMR (75 MHz) δ 135.7, 135.6, 133.5, 132.9, 132.2, 132.1, 124.4, 122.5, 48.8, 39.4; IR (neat) 3285, 2972, 2919, 2856, 1486, 1466, 1442, 1363, 1227, 1185, 1124, 1094, 1043, 1017 cm<sup>-1</sup>; mass spectrum (ESI) *m/z* 286.9904 [C<sub>10</sub>H<sub>9</sub>N<sub>4</sub>Na<sup>79</sup>Br (M+Na) requires 286.9903]; LCMS purity 100%.

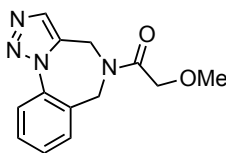

**8{2}**

**1-(4H-Benzo[f][1,2,3]triazolo[1,5-a][1,4]diazepin-5(6H)-yl)-2-methoxyethanone (8{2}).**

Methoxyacetyl chloride (**20{2}**) (39 μL, 0.43 mmol) was added to a solution of amine **6** (40 mg, 0.21 mmol) and triethylamine (90 μL, 0.64 mmol) in anhydrous CH<sub>2</sub>Cl<sub>2</sub> (1.0 mL), and the reaction was stirred at room temperature for 3 h. The mixture was diluted with CH<sub>2</sub>Cl<sub>2</sub> (20 mL) and washed with aqueous HCl (10 mL, 1.0 M) and saturated aqueous NaHCO<sub>3</sub> (10 mL). The organic layer was dried (MgSO<sub>4</sub>) and concentrated under reduced pressure, and the residue was purified by flash chromatography eluting with EtOAc to give 53 mg (96%) of amide **8{2}** as a colorless solid: mp 110-112 °C; <sup>1</sup>H NMR (400 MHz) (rotamers) δ 8.01-7.93 (comp, 1 H), 7.81 (s, 1 H), 7.66-7.46 (comp, 3 H), 4.75 (s, 0.7 H), 4.72 (s, 1.3 H), 4.58 (s, 0.7 H), 4.49 (s, 1.3 H), 4.29 (s, 1.3 H), 4.21 (s, 0.7 H), 3.47 (s, 2 H), 3.44 (s, 1 H); <sup>13</sup>C NMR (400 MHz) (rotamers) δ 168.1, 168.0, 136.3, 133.8, 133.0, 131.1, 131.8, 131.3, 130.5, 130.3, 129.8, 129.7, 128.2, 123.3, 123.0, 72.5, 59.3, 47.3, 45.4, 39.0, 38.0; IR (neat) 2926, 2824, 1660, 1497, 1454, 1431, 1235, 1198, 1130, 1109; mass spectrum (ESI) *m/z* 259.1187 [C<sub>13</sub>H<sub>15</sub>N<sub>4</sub>O<sub>2</sub> (M+1) requires 259.1190]; LCMS purity 100%.

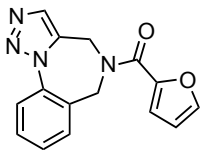

8{11}

**(4*H*-Benzo[*f*][1,2,3]triazolo[1,5-*a*][1,4]diazepin-5(6*H*)-yl)(furan-2-yl)methanone (8{11}).** 2-Furoyl chloride (**20{11}**) (49 mg, 40  $\mu$ L, 0.38 mmol) was added to a solution of amine **6** (35 mg, 0.19 mmol) and triethylamine (57 mg, 79  $\mu$ L, 0.56 mmol) in anhydrous  $\text{CH}_2\text{Cl}_2$  (1.0 mL), and the reaction was stirred at room temperature for 2.5 h. The mixture was diluted with  $\text{CH}_2\text{Cl}_2$  (20 mL), and the mixture was washed with saturated aqueous  $\text{NaHCO}_3$  (10 mL). The organic layer was dried ( $\text{MgSO}_4$ ) and concentrated under reduced pressure, and the residue was purified by flash chromatography eluting with hexanes/EtOAc (4 : 6) to give 50 mg (95%) of amide **8{11}** as a colorless solid: mp 107-109  $^\circ\text{C}$ ;  $^1\text{H}$  NMR (400 MHz) (rotamers)  $\delta$  7.98 (d,  $J = 7.9$  Hz, 1 H), 7.83 (s, 1 H), 7.65-7.42 (comp, 4 H), 7.18 (d,  $J = 3.4$  Hz, 1 H), 6.57 (m, 1 H), 5.24-4.50 (comp, 4 H);  $^{13}\text{C}$  NMR (500 MHz) (rotamers)  $\delta$  158.9, 147.4, 144.5, 136.2, 133.6, 131.9, 131.2, 130.3, 129.7, 128.2, 123.0, 118.1, 111.8, 48.4, 46.3, 40.8, 38.5; IR (neat) 3133, 2923, 2857, 1624, 1574, 1496, 1481, 1416, 1247, 1175, 1107, 1014  $\text{cm}^{-1}$ ; mass spectrum (CI)  $m/z$  281.1040 [ $\text{C}_{15}\text{H}_{13}\text{N}_4\text{O}_2$  (M+1) requires 281.1039]; LCMS purity 99%.

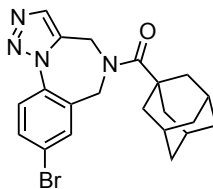

9{12}

**Adamantan-1-yl(8-bromo-4*H*-benzo[*f*][1,2,3]triazolo[1,5-*a*][1,4]diazepin-5(6*H*)-yl)methanone (9{12}).** 1-Adamantanecarbonyl chloride (60 mg, 0.30 mmol) was added to a solution amine **7** (40 mg, 0.15 mmol) and triethylamine (46 mg, 63  $\mu$ L, 0.45 mmol) in anhydrous  $\text{CH}_2\text{Cl}_2$  (1.0 mL), and the reaction was stirred at room temperature for 2.5 h. The mixture was diluted with  $\text{CH}_2\text{Cl}_2$  (20 mL), and the mixture was washed with aqueous HCl (10 mL, 1.0 M) and saturated aqueous  $\text{NaHCO}_3$  (10 mL). The organic layer was dried ( $\text{MgSO}_4$ ) and concentrated under reduced pressure, and the residue was purified by recrystallization from *i*-PrOH to give 43 mg (67%) of amide **9{12}** as colorless microcrystals: mp 218-219  $^\circ\text{C}$ ;  $^1\text{H}$  NMR (400 MHz)  $\delta$  7.88 (d,  $J = 8.5$  Hz, 1 H), 7.80 (s, 1 H), 7.72 (dd,  $J = 8.5, 2.2$  Hz, 1 H), 7.68 (d,  $J = 2.2$  Hz, 1 H), 4.79 (s, 2 H), 4.57 (s, 2 H) 2.16-2.09 (m, 3 H), 2.09-2.04 (m, 6 H), 1.84-1.71 (m, 6H);  $^{13}\text{C}$  NMR (100 MHz)  $\delta$  176.2, 135.4, 133.7, 133.4 (2C), 132.7, 130.4,

124.4, 123.1, 48.2, 42.4, 40.1, 39.3, 36.6, 28.5; IR (neat) 2907, 2852, 1623, 1493, 1452, 1384, 1232, 1205, 1179, 1102, 1077  $\text{cm}^{-1}$ ; mass spectrum (ESI)  $m/z$  427.1134 [ $\text{C}_{21}\text{H}_{24}\text{N}_4\text{OBr}$  ( $\text{M}+1$ ) requires 427.1128]; LCMS purity 100%.

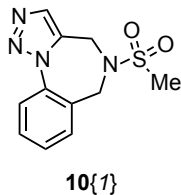

**5-(Methylsulfonyl)-5,6-dihydro-4H-benzo[f][1,2,3]triazolo[1,5-a][1,4]diazepine (10{1}).**

Methanesulfonyl chloride (**21{1}**) (33  $\mu\text{L}$ , 0.43 mmol) was added to a solution of amine **6** (40 mg, 0.21 mmol) and triethylamine (90  $\mu\text{L}$ , 0.64 mmol) in anhydrous  $\text{CH}_2\text{Cl}_2$  (1.0 mL), and the reaction was stirred at room temperature for 3 h. The mixture was diluted with  $\text{CH}_2\text{Cl}_2$  (20 mL) and washed with aqueous HCl (10 mL, 1.0 M) and saturated aqueous  $\text{NaHCO}_3$  (10 mL). The organic layer was dried ( $\text{MgSO}_4$ ) and concentrated under reduced pressure, and the residue was purified by flash chromatography eluting with hexanes/EtOAc (6 : 4  $\rightarrow$  4 : 6) to give 55 mg (97%) of sulfonamide **10{1}** as a colorless solid: mp 170-172  $^\circ\text{C}$ ;  $^1\text{H}$  NMR (400 MHz)  $\delta$  7.95 (d,  $J = 7.8$  Hz, 1 H), 7.86 (s, 1 H), 7.69-7.61 (m, 1 H), 7.59-7.52 (comp, 2 H), 4.52 (s, 2 H), 4.32 (s, 2 H), 2.84 (s, 3 H);  $^{13}\text{C}$  NMR (400 MHz)  $\delta$  136.3, 133.3, 131.0 (2C), 130.9, 130.2, 126.8, 123.6, 48.3, 39.1, 37.4; IR (neat) 3011, 2928, 2854, 1497, 1471, 1334, 1233, 1156, 1022; mass spectrum (ESI)  $m/z$  265.0754 [ $\text{C}_{11}\text{H}_{13}\text{N}_4\text{O}_2\text{S}$  ( $\text{M}+1$ ) requires 265.0753]; LCMS purity 100%.

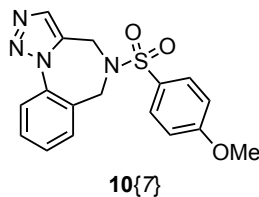

**5-(4-Methoxyphenylsulfonyl)-5,6-dihydro-4H-benzo[f][1,2,3]triazolo[1,5-a][1,4]diazepine**

**(10{7}).** 4-Methoxybenzenesulfonyl chloride (**21{7}**) (67 mg, 0.32 mmol) was added to a solution of amine **6** (30 mg, 0.16 mmol) and triethylamine (49 mg, 67  $\mu\text{L}$ , 0.48 mmol) in anhydrous  $\text{CH}_2\text{Cl}_2$  (1.0 mL), and the reaction was stirred at room temperature for 18 h. The mixture was diluted with  $\text{CH}_2\text{Cl}_2$  (20 mL) and washed with aqueous HCl (10 mL, 1.0 M) and saturated aqueous  $\text{NaHCO}_3$  (10 mL). The organic layer was dried ( $\text{MgSO}_4$ ) and concentrated under reduced pressure, and the residue was purified by flash chromatography eluting with hexanes/EtOAc (6 : 4) to give 54 mg (94%) of sulfonamide **10{7}** as a colorless solid: mp 144-146  $^\circ\text{C}$ ;  $^1\text{H}$  NMR (400 MHz)  $\delta$  7.82 (d,  $J = 7.8$  Hz, 1 H), 7.76 (d,  $J = 9.0$

Hz, 2 H), 7.60-7.53 (m, 1 H), 7.52 (s, 1 H), 7.50-7.43 (comp, 2 H), 6.96 (d,  $J = 9.0$  Hz, 2 H), 4.48 (s, 2 H), 4.20 (s, 2 H), 3.85 (s, 3 H);  $^{13}\text{C}$  NMR (300 MHz)  $\delta$  163.6, 136.1, 133.0, 131.4, 130.9, 130.6, 129.9, 129.7, 129.0, 126.6, 123.2, 114.7, 55.8, 48.5, 39.1; IR (neat) 3074, 3006, 2925, 2843, 1596, 1578, 1497, 1462, 1355, 1338, 1309, 1262, 1159, 1093, 1021  $\text{cm}^{-1}$ ; mass spectrum (ESI)  $m/z$  357.1016 [ $\text{C}_{17}\text{H}_{17}\text{N}_4\text{O}_3\text{S}$  (M+1) requires 357.1016]; LCMS purity 99%.

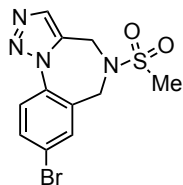

**11{1}**

**8-Bromo-5-(methylsulfonyl)-5,6-dihydro-4H-benzo[f][1,2,3]triazolo[1,5-a][1,4]diazepine (11{1}).**

Methanesulfonyl chloride (**21{1}**) (26 mg, 18  $\mu\text{L}$ , 0.23 mmol) was added to a solution of amine **7** (30 mg, 0.11 mmol) and triethylamine (34 mg, 47  $\mu\text{L}$ , 0.34 mmol) in anhydrous  $\text{CH}_2\text{Cl}_2$  (1.0 mL), and the reaction was stirred at room temperature for 4 h. The mixture was diluted with  $\text{CH}_2\text{Cl}_2$  (20 mL) and washed with aqueous HCl (10 mL, 1.0 M) and saturated aqueous  $\text{NaHCO}_3$  (10 mL). The organic layer was dried ( $\text{MgSO}_4$ ) and concentrated under reduced pressure, and the residue was purified by flash chromatography eluting with  $\text{CH}_2\text{Cl}_2/\text{MeOH}$  (98 : 2) to give 33 mg (85%) of sulfonamide **11{1}** as a colorless solid: mp 229-231  $^\circ\text{C}$ ;  $^1\text{H}$  NMR (400 MHz,  $d_6$ -DMSO)  $\delta$  8.12 (s, 1 H), 8.10 (d,  $J = 1.6$  Hz, 1 H), 7.89 (dd, 8.5, 1.6 Hz, 1 H), 7.85 (d, 8.5 Hz, 1 H), 4.55 (s, 2 H), 4.29 (s, 2 H), 3.00 (s, 3 H);  $^{13}\text{C}$  NMR (100 MHz,  $d_6$ -DMSO)  $\delta$  135.3, 134.0, 133.6, 133.3, 131.9, 129.5, 124.8, 122.3, 47.0, 38.3, 36.4; IR (neat) 2921, 2851, 1492, 1352, 1336, 1231, 1193, 1162, 1138, 1099, 1023  $\text{cm}^{-1}$ ; mass spectrum (ESI)  $m/z$  364.9679 [ $\text{C}_{11}\text{H}_{11}\text{N}_4\text{O}_2\text{NaSBr}$  (M+Na) requires 364.9678]; LCMS purity 100%.

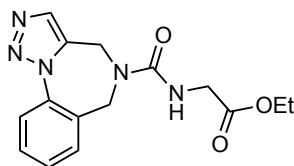

**12{2}**

**Ethyl 2-(5,6-dihydro-4H-benzo[f][1,2,3]triazolo[1,5-a][1,4]diazepine-5-carboxamido)acetate (12{2}).** Ethyl isocyanatoacetate (**22{2}**) (42 mg, 36  $\mu\text{L}$ , 0.32 mmol) was added to a solution of amine **6** (30 mg, 0.16 mmol) in anhydrous  $\text{CH}_2\text{Cl}_2$  (1.0 mL), and the reaction was stirred at room temperature for 3 h. The mixture was diluted with  $\text{CH}_2\text{Cl}_2$  (20 mL) and washed with aqueous HCl (10 mL, 1.0 M) and saturated aqueous  $\text{NaHCO}_3$  (10 mL). The organic layer was dried ( $\text{MgSO}_4$ ) and concentrated under

reduced pressure, and the residue was purified by flash chromatography eluting with EtOAc to give 40 mg (79%) of urea **12{2}** as a colorless glass:  $^1\text{H}$  NMR (400 MHz)  $\delta$  7.95 (dd,  $J = 7.6, 1.4$  Hz, 1 H), 7.79 (s, 1 H), 7.58 (app td,  $J = 7.6, 1.6$  Hz, 1 H), 7.53 (dd,  $J = 7.6, 1.6$  Hz, 1 H), 7.47 (app td,  $J = 7.6, 1.4$  Hz, 1 H), 5.35 (t,  $J = 5.2$  Hz, 1 H), 4.66 (s, 2 H), 4.43 (s, 2 H), 4.22 (q,  $J = 7.2$  Hz, 2 H), 4.03 (d,  $J = 5.1$  Hz, 2 H), 1.29 (t,  $J = 7.2$  Hz, 3 H);  $^{13}\text{C}$  NMR (500 MHz)  $\delta$  171.0, 156.4, 136.2, 133.1, 132.2, 130.6, 130.1, 129.6, 128.6, 123.1, 61.6, 46.7, 42.9, 38.7, 14.2; IR (neat) 3346, 3073, 2985, 2937, 1747, 1644, 1538, 1497, 1395, 1201, 1025  $\text{cm}^{-1}$ ; mass spectrum (CI)  $m/z$  316.1412 [ $\text{C}_{15}\text{H}_{18}\text{N}_5\text{O}_3$  (M+1) requires 316.1410]; LCMS purity 98%.

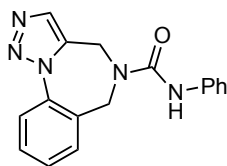

**12{4}**

***N*-Phenyl-4*H*-benzo[*f*][1,2,3]triazolo[1,5-*a*][1,4]diazepine-5(6*H*)-carboxamide (12{4}).**

Phenyl isocyanate (**22{4}**) (45 mg, 41  $\mu\text{L}$ , 0.38 mmol) was added to a solution of amine **6** (35 mg, 0.19 mmol) in anhydrous  $\text{CH}_2\text{Cl}_2$  (1.0 mL), and the reaction was stirred at room temperature for 2 h. The mixture was diluted with  $\text{CH}_2\text{Cl}_2$  (20 mL) and washed with aqueous HCl (10 mL, 1.0 M) and saturated aqueous  $\text{NaHCO}_3$  (10 mL). The organic layer was dried ( $\text{MgSO}_4$ ) and concentrated under reduced pressure, and the residue was purified by flash chromatography eluting with hexanes/EtOAc to give 57 mg (99%) of urea **12{4}** as a colorless foam;  $^1\text{H}$  NMR (600 MHz)  $\delta$  7.42 (dd,  $J = 7.5, 1.2$  Hz, 1 H), 7.73 (s, 1 H), 7.58 (app td,  $J = 7.5, 1.5$  Hz, 1 H), 7.50 (dd,  $J = 7.5, 1.5$  Hz, 1 H), 7.47 (app td,  $J = 7.5, 1.2$  Hz, 1 H), 7.34 (dd,  $J = 8.5, 1.1$  Hz, 2 H), 7.26 (dd,  $J = 8.5, 7.4$  Hz, 2 H), 7.05 (tt,  $J = 7.4, 1.1$  Hz, 1 H), 6.81 (br s, 1 H), 4.71 (s, 2 H), 4.47 (s, 2 H);  $^{13}\text{C}$  NMR (150 MHz)  $\delta$  154.6, 138.5, 136.2, 133.1, 132.2, 130.7, 130.2, 129.7, 129.0, 128.5, 123.9, 123.1, 120.7, 46.9, 38.8; IR (neat) 3314, 3132, 3060, 2920, 2859, 1643, 1597, 1537, 1499, 1444, 1393, 1367, 1311, 1241  $\text{cm}^{-1}$ ; mass spectrum (ESI)  $m/z$  306.1349 [ $\text{C}_{17}\text{H}_{16}\text{N}_5\text{O}$  (M+1) requires 306.1349]; LCMS purity 97%.



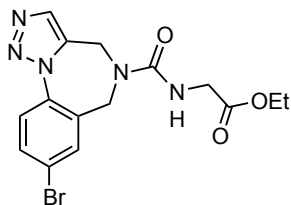

**13{2}**

**Ethyl 2-(8-bromo-5,6-dihydro-4H-benzo[f][1,2,3]triazolo[1,5-a][1,4]diazepine-5-carboxamido)acetate (13{2}).** Ethyl isocyanatoacetate (**22{2}**) (39 mg, 34  $\mu$ L, 0.30 mmol) was added to a solution of amine **7** (40 mg, 0.15 mmol) in anhydrous  $\text{CH}_2\text{Cl}_2$  (1.0 mL), and the reaction was stirred at room temperature for 2.5 h. The mixture was diluted with  $\text{CH}_2\text{Cl}_2$  (20 mL) and washed with aqueous HCl (10 mL, 1.0 M) and saturated aqueous  $\text{NaHCO}_3$  (10 mL). The organic layer was dried ( $\text{MgSO}_4$ ) and concentrated under reduced pressure, and the residue was purified by flash chromatography eluting with hexanes/EtOAc (1 : 2) to give 34 mg (57%) of urea **12{2}** as a colorless solid: mp 164-166  $^\circ\text{C}$ ;  $^1\text{H}$  NMR (400 MHz)  $\delta$  7.88-7.84 (m, 1 H), 7.80 (s, 1 H), 7.72-7.65 (comp, 2 H), 5.15-5.08 (m, 1 H), 4.67 (s, 2 H), 4.20 (s, 2 H), 4.24 (q,  $J = 7.1$  Hz, 2 H), 4.04 (d,  $J = 5.1$  Hz, 2 H), 1.30 (t,  $J = 7.1$  Hz, 3 H);  $^{13}\text{C}$  NMR (100 MHz)  $\delta$  171.0, 156.3, 135.3, 133.6 (2C), 133.3, 132.2, 130.7, 124.7, 123.3, 61.8, 46.2, 43.0, 39.1, 14.3; IR (neat) 3333, 3060, 2925, 2852, 1745, 1642, 1632, 1547, 1535, 1494, 1391, 1197  $\text{cm}^{-1}$ ; mass spectrum (ESI)  $m/z$  394.0509 [ $\text{C}_{15}\text{H}_{17}\text{N}_5\text{O}_3\text{Br}$  (M+1) requires 394.0510]; LCMS purity 100%.

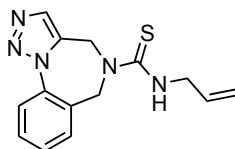

**14{1}**

**N-Allyl-4H-benzo[f][1,2,3]triazolo[1,5-a][1,4]diazepine-5(6H)-carbothioamide (14{1}).** Allyl isothiocyanate (**23{1}**) (24 mg, 24  $\mu$ L, 0.24 mmol) was added to a solution of amine **6** (35 mg, 0.19 mmol) in anhydrous  $\text{CH}_2\text{Cl}_2$  (1.0 mL), and the reaction was stirred at room temperature for 3 h. The mixture was diluted with  $\text{CH}_2\text{Cl}_2$  (20 mL) and washed with saturated aqueous  $\text{NaHCO}_3$  (10 mL). The organic layer was dried ( $\text{MgSO}_4$ ) and concentrated under reduced pressure, and the residue was purified by flash chromatography eluting with hexanes/EtOAc (4 : 6) to give 53 mg (99%) of thiourea **14{1}** as a colorless solid: mp 149-151  $^\circ\text{C}$ ;  $^1\text{H}$  NMR (400 MHz)  $\delta$  7.93 (d,  $J = 7.6$  Hz, 1 H), 7.79 (s, 1 H), 7.64 (dd,  $J = 7.6, 1.2$  Hz, 1 H), 7.59 (app td,  $J = 7.6, 1.2$  Hz, 1 H), 7.49 (app, t,  $J = 7.6$  Hz, 1 H), 6.18 (br s, 1 H), 5.93 (ddt,  $J = 17.0, 10.5, 5.7$  Hz, 1 H), 5.21 (d,  $J = 17.0$  Hz, 1 H), 5.16 (d,  $J = 10.5$  Hz, 1 H), 5.05 (s, 2 H), 4.92 (s, 2 H), 4.33 (t,  $J = 5.7$  Hz, 2 H);  $^{13}\text{C}$  NMR (500 MHz)  $\delta$  181.7, 135.9, 133.6, 133.4, 131.6,

131.0, 130.4, 129.7, 127.9, 122.9, 117.8, 50.1, 49.2, 42.4; IR (neat) 3289, 3063, 2986, 2922, 1531, 1496, 1455, 1370, 1232, 1191, 1111  $\text{cm}^{-1}$ ; mass spectrum (CI)  $m/z$  286.1130 [ $\text{C}_{14}\text{H}_{16}\text{N}_5\text{S}$  ( $\text{M}+1$ ) requires 286.1126]; LCMS purity 99%.

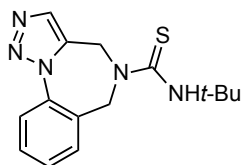

**14{4}**

***N*-tert-butyl-4*H*-benzo[*f*][1,2,3]triazolo[1,5-*a*][1,4]diazepine-5(6*H*)-carbothioamide (14{4}).**

*tert*-Butyl isothiocyanate (**23{4}**) (24 mg, 26  $\mu\text{L}$ , 0.21 mmol) was added to a solution of amine **6** (35 mg, 0.19 mmol) in anhydrous  $\text{CH}_2\text{Cl}_2$  (1.0 mL), and the reaction was stirred at room temperature for 18 h. The mixture was diluted with  $\text{CH}_2\text{Cl}_2$  (20 mL) and washed with saturated aqueous  $\text{NaHCO}_3$  (10 mL). The organic layer was dried ( $\text{MgSO}_4$ ) and concentrated under reduced pressure, and the residue was purified by flash chromatography eluting with hexanes/EtOAc (4 : 6) to give 47 mg (83%) of thiourea **14{4}** as a colorless solid: mp 152-154  $^\circ\text{C}$ ;  $^1\text{H}$  NMR (400 MHz)  $\delta$  8.00 (d,  $J = 8.2$  Hz, 1 H), 7.79 (s, 1 H), 7.62-7.55, (comp, 2 H), 7.48 (app t,  $J = 7.4$  Hz, 1 H), 5.51 (s, 1 H), 5.04 (s, 2 H), 4.80 (s, 2 H), 1.57 (s, 9 H);  $^{13}\text{C}$  NMR (500 MHz)  $\delta$  180.5, 136.2, 133.4, 132.1, 130.6, 130.3, 129.4, 127.9, 123.0, 55.0, 49.9, 42.6, 29.1 ; IR (neat) 3403, 3060, 2966, 2925, 1532, 1496, 1396, 1354, 1247, 1204, 1176, 1109  $\text{cm}^{-1}$ ; mass spectrum (CI)  $m/z$  302.1439 [ $\text{C}_{15}\text{H}_{20}\text{N}_5\text{S}$  ( $\text{M}+1$ ) requires 302.1439]; LCMS purity 99%.

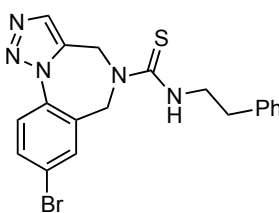

**15{3}**

**8-bromo-*N*-phenethyl-4*H*-benzo[*f*][1,2,3]triazolo[1,5-*a*][1,4]diazepine-5(6*H*)-**

**carbothioamide (15{3}).** Phenethyl isothiocyanate (**23{3}**) (49 mg, 45  $\mu\text{L}$ , 0.30 mmol) was added to a solution of amine **7** (40 mg, 0.15 mmol) in anhydrous  $\text{CH}_2\text{Cl}_2$  (1.0 mL), and the reaction was stirred at room temperature for 2 h. The mixture was diluted with  $\text{CH}_2\text{Cl}_2$  (20 mL) and washed with saturated aqueous  $\text{NaHCO}_3$  (10 mL). The organic layer was dried ( $\text{MgSO}_4$ ) and concentrated under reduced pressure, and the residue was purified by flash chromatography eluting with hexanes/EtOAc (3 : 1  $\rightarrow$  0 : 1) to give 54 mg (83%) of thiourea **15{3}** as a colorless solid: mp 133-135  $^\circ\text{C}$ ;  $^1\text{H}$  NMR (400 MHz)  $\delta$

7.86-7.82 (m, 1 H), 7.73 (s, 1 H), 7.72-7.67 (m, 1 H), 7.65 (m, 1 H), 7.34 (app t,  $J = 8.0$  Hz, 2 H), 7.27 (td,  $J = 8.0, 1.2$  Hz, 1 H), 7.22 (m, 2 H), 5.66 (t,  $J = 6.1$  Hz, 1 H), 4.84 (s, 2 H), 4.77 (s, 2 H), 3.95 (app q,  $J = 6.1$  Hz, 2 H), 2.99 (t,  $J = 6.1$  Hz, 2 H);  $^{13}\text{C}$  NMR (100 MHz)  $\delta$  181.7, 138.6, 135.0, 133.7 (2C), 133.5, 131.6, 129.8, 129.1, 128.9, 127.1, 124.3, 123.2, 49.5, 47.4, 42.5, 34.9; IR (neat) 3320, 3060, 2930, 1531, 1493, 1451, 1373, 1342, 1233, 1172,  $\text{cm}^{-1}$ ; mass spectrum (ESI)  $m/z$  428.0539 [ $\text{C}_{19}\text{H}_{19}\text{N}_5\text{SBr}$  (M+1) requires 428.0540]; LCMS purity 99%.

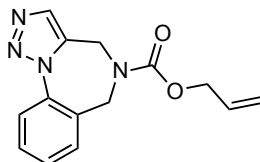

**16{2}**

**Allyl 4H-benzo[f][1,2,3]triazolo[1,5-a][1,4]diazepine-5(6H)-carboxylate (16{2}).** Allyl chloroformate (**24{2}**) (78 mg, 69  $\mu\text{L}$ , 0.64 mmol) was added to a solution of amine **6** (60 mg, 0.32 mmol) and triethylamine (98 mg, 135  $\mu\text{L}$ , 0.97 mmol) in anhydrous  $\text{CH}_2\text{Cl}_2$  (2.0 mL) at 0  $^\circ\text{C}$ , and the reaction was stirred at room temperature for 2 h. The mixture was diluted with  $\text{CH}_2\text{Cl}_2$  (20 mL) and washed with aqueous HCl (10 mL, 1.0 M) and saturated aqueous  $\text{NaHCO}_3$  (10 mL). The organic layer was dried ( $\text{MgSO}_4$ ) and concentrated under reduced pressure, and the residue was purified by flash chromatography eluting with hexanes/EtOAc (1 : 1) to give 83 mg (95%) of carbamate **16{2}** as a colorless oil:  $^1\text{H}$  NMR (300 MHz) (rotamers)  $\delta$  7.95 (d,  $J = 7.7$  Hz, 1 H), 7.80 (s, 1 H), 7.63-7.43 (comp, 3 H), 6.06-5.88 (m, 1 H), 5.42-5.18 (comp, 2 H), 4.76-4.58 (comp, 4 H), 4.48 (s, 1 H), 4.47 (s, 1 H);  $^{13}\text{C}$  NMR (300 MHz) (rotamers)  $\delta$  154.6, 136.2, 133.2, 132.4, 132.2, 131.9, 130.7, 130.4, 130.0, 129.6, 129.4, 128.7, 128.5, 123.1, 122.9, 118.1, 118.0, 66.7, 46.8, 46.5, 38.9, 38.6; IR (neat) 3132, 3085, 2989, 2941, 2867, 1696, 1496, 1470, 1413, 1347, 1295, 1235, 1123, 1085  $\text{cm}^{-1}$ ; mass spectrum (ESI)  $m/z$  293.1011 [ $\text{C}_{14}\text{H}_{14}\text{N}_4\text{O}_2\text{Na}$  (M+Na) requires 293.1009]; LCMS purity 99%.

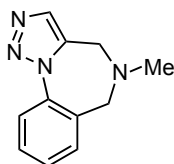

**17{1}**

**5-Methyl-5,6-dihydro-4H-benzo[f][1,2,3]triazolo[1,5-a][1,4]diazepine (17{1}).** A mixture of sodium triacetoxyborohydride (478 mg, 2.26 mmol), amine **6** (70 mg, 0.38 mmol), paraformaldehyde (**25{1}**) (113 mg, 3.76 mmol) and glacial acetic acid (22  $\mu\text{L}$ , 0.38 mmol) in DCE (5.5 mL) was stirred at

room temperature for 24 h. The reaction was diluted with CH<sub>2</sub>Cl<sub>2</sub> (20 mL) and saturated aqueous NaHCO<sub>3</sub> (30 mL), and the layers were separated. The aqueous layer was extracted with CH<sub>2</sub>Cl<sub>2</sub> (2 × 20 mL), and the combined organic layers were concentrated under reduced pressure. The residue was dissolved in Et<sub>2</sub>O (20 mL), extracted with aqueous HCl (3 × 10 mL, 1.0 M) and the combined aqueous extracts washed with Et<sub>2</sub>O (20 mL). The pH of the aqueous layer was then raised to ~ 11-12 through the addition of aqueous NaOH (1.0 M) and the resulting solution extracted with CH<sub>2</sub>Cl<sub>2</sub> (3 × 20 mL). The combined organic extracts were dried (MgSO<sub>4</sub>) and concentrated under reduced pressure, and the residue was purified by flash chromatography eluting with CH<sub>2</sub>Cl<sub>2</sub>/MeOH (98 : 2 → 95 : 5) to give 54 mg (71%) of amine **17{1}** as a colorless solid: mp 85-87 °C; <sup>1</sup>H NMR (400 MHz) δ 7.89 (d, *J* = 8.0 Hz, 1 H), 7.76 (s, 1 H), 7.56 (ddd, *J* = 8.0, 6.5, 2.5 Hz, 1 H), 7.5-7.43 (comp, 2 H), 3.65 (s, 2 H), 3.49 (s, 2 H), 2.48 (s, 3 H); <sup>13</sup>C NMR (400 MHz) δ 136.7, 133.4, 132.9, 131.1, 129.7, 129.2, 129.1, 122.8, 56.8, 46.8, 44.1; IR (neat) 3057, 2942, 2848, 2788, 1492, 1468, 1370, 1227, 1138, 1126, 1098, 1079, 1031; mass spectrum (ESI) *m/z* 201.1136 [C<sub>11</sub>H<sub>13</sub>N<sub>4</sub> (M+1) requires 201.1135]; LCMS purity 100%.

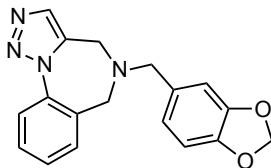

**17{9}**

**5-(Benzo[*d*][1,3]dioxol-5-ylmethyl)-5,6-dihydro-4*H*-benzo[*f*][1,2,3]triazolo[1,5-*a*][1,4]diazepine (17{9}).** A mixture of sodium triacetoxyborohydride (239 mg, 1.13 mmol), amine **6** (35 mg, 0.19 mmol), piperonal (**25{9}**) (169 mg, 1.13 mmol) and glacial acetic acid (11 mg, 11 μL, 0.19 mmol) in DCE (3.0 mL) was stirred at room temperature for 18 h. The reaction was diluted with CH<sub>2</sub>Cl<sub>2</sub> (20 mL) and saturated aqueous NaHCO<sub>3</sub> (20 mL), and the layers were separated. The aqueous layer was extracted with CH<sub>2</sub>Cl<sub>2</sub> (2 × 10 mL), and the combined organic layers were concentrated under reduced pressure. The residue was dissolved in Et<sub>2</sub>O (20 mL), and the solution was extracted with aqueous HCl (3 × 10 mL, 1.0 M). The combined aqueous extracts were washed with Et<sub>2</sub>O (10 mL). The pH of the aqueous layer was then raised to ~ 11-12 by adding aqueous NaOH (1.0 M), and the resulting solution was extracted with CH<sub>2</sub>Cl<sub>2</sub> (3 × 20 mL). The combined organic extracts were dried (MgSO<sub>4</sub>) and concentrated under reduced pressure, and the residue was purified by flash chromatography eluting with hexanes/EtOAc (1 : 1) to give 58 mg (96%) of amine **17{9}** as a yellow gum: <sup>1</sup>H NMR (400 MHz) δ 7.90 (dd, *J* = 7.6, 1.4 Hz, 1 H), 7.73 (s, 1 H), 7.55 (app td, *J* = 7.6, 1.6 Hz, 1 H), 7.46 (app td, *J* = 7.6, 1.4 Hz, 1 H), 7.41 (dd, *J* = 7.6, 1.6 Hz, 1 H), 6.92 (s, 1 H), 6.83-6.78 (comp, 2 H), 5.97 (s, 2 H), 3.64 (s, 2

H), 3.61 (s, 2 H), 3.52 (s, 2 H);  $^{13}\text{C}$  NMR (75 MHz)  $\delta$  148.1, 147.2, 136.8, 133.6, 132.9, 131.8, 131.2, 129.6, 129.1, 129.1, 122.8, 122.3, 109.4, 108.2, 101.2, 60.1, 54.2, 44.5; IR (neat) 2901, 2813, 1491, 1433, 1245, 1098, 1039  $\text{cm}^{-1}$ ; mass spectrum (ESI)  $m/z$  321.1346 [ $\text{C}_{18}\text{H}_{17}\text{N}_4\text{O}_2$  (M+1) requires 321.1346]; LCMS purity 99%.

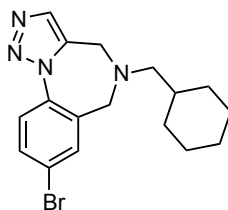

**18{12}**

**8-bromo-5-(cyclohexylmethyl)-5,6-dihydro-4H-benzo[f][1,2,3]triazolo[1,5-a][1,4]diazepine (18{12})**. A mixture of sodium triacetoxyborohydride (192 mg, 0.91 mmol), amine **7** (40 mg, 0.15 mmol), cyclohexanecarboxaldehyde (**25{12}**) (102 mg, 110  $\mu\text{L}$ , 0.91 mmol) and glacial acetic acid (9 mg, 9  $\mu\text{L}$ , 0.15 mmol) in DCE (3.0 mL) was stirred at room temperature for 3 h. The reaction was diluted with  $\text{CH}_2\text{Cl}_2$  (20 mL) and saturated aqueous  $\text{NaHCO}_3$  (20 mL), and the layers were separated. The aqueous layer was extracted with  $\text{CH}_2\text{Cl}_2$  ( $2 \times 10$  mL), and the combined organic layers were concentrated under reduced pressure. The residue was dissolved in  $\text{Et}_2\text{O}$  (20 mL), and the solution was extracted with aqueous HCl ( $3 \times 10$  mL, 1.0 M). The combined aqueous extracts were washed with  $\text{Et}_2\text{O}$  (10 mL). The pH of the aqueous layer was then raised to  $\sim 11$ -12 by adding aqueous NaOH (1.0 M), and the resulting solution was extracted with  $\text{CH}_2\text{Cl}_2$  ( $3 \times 20$  mL). The combined organic extracts were dried ( $\text{MgSO}_4$ ) and concentrated under reduced pressure, and the residue was purified by flash chromatography eluting with hexanes/ $\text{EtOAc}$  (2 : 1) to give 30 mg (55%) of amine **18{12}** as a colorless glass:  $^1\text{H}$  NMR (400 MHz)  $\delta$  7.80 (d,  $J = 8.5$  Hz, 1 H), 7.75 (s, 1 H), 7.67 (dd,  $J = 8.5, 1.8$  Hz, 1 H), 7.58 (d,  $J = 1.8$  Hz, 1 H), 3.68 (s, 2 H), 3.52 (s, 2 H), 2.39 (d,  $J = 7.0$  Hz, 2 H), 1.88-1.65 (comp, 5 H), 1.58-1.44 (m, 1 H), 1.34-1.12 (comp, 3 H), 1.00-0.85 (comp, 2.0 Hz);  $^{13}\text{C}$  NMR (100 MHz)  $\delta$  135.8, 134.0, 133.2, 132.6, 131.3, 124.2, 122.7, 63.2, 55.2, 45.6, 35.8, 31.7, 26.8, 26.1; IR (neat) 2923, 2849, 1489, 1447, 1358, 1260, 1230, 1182, 1100  $\text{cm}^{-1}$ ; mass spectrum (ESI)  $m/z$  361.1022 [ $\text{C}_{17}\text{H}_{22}\text{N}_4\text{Br}$  (M+1) requires 361.1023]; LCMS purity 99%.

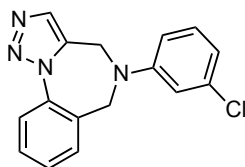

**19{1}**

**5-(3-Chlorophenyl)-5,6-dihydro-4H-benzo[f][1,2,3]triazolo[1,5-a][1,4]diazepine (19{1}).**

Palladium acetate (2.4 mg, 0.011 mmol) was added to a solution of (±)-BINAP (10 mg, 0.016 mmol) in degassed toluene (1.0 mL) and the mixture was stirred at room temperature for 1 min. Amine **6** (40 mg, 0.21 mmol), 1-bromo-3-chlorobenzene (**26{1}**) (82 mg, 50  $\mu$ L, 0.43 mmol) and then sodium *tert*-butoxide (29 mg, 0.30 mmol) were added, and the reaction was heated at 80 °C for 2.5 h. The cooled reaction was diluted with Et<sub>2</sub>O (5 mL) and filtered through Celite<sup>®</sup>, washing with Et<sub>2</sub>O (5 mL). The combined filtrate and washings were concentrated under reduced pressure, and the residue was purified by flash chromatography eluting with hexanes/EtOAc (7 : 3) to give 61 mg (96%) of amine **19{1}** as a yellow glass: <sup>1</sup>H NMR (400 MHz)  $\delta$  7.99 (d,  $J$  = 7.5 Hz, 1 H), 7.79 (s, 1 H), 7.55 (app td,  $J$  = 7.5, 2.1 Hz, 1 H), 7.49-7.40 (comp, 2 H), 7.19 (app t,  $J$  = 8.2 Hz, 1 H), 6.87 (app t,  $J$  = 2.2 Hz, 1 H), 6.83-6.76 (comp, 2 H), 4.47 (s, 2 H), 4.33 (s, 2 H); <sup>13</sup>C NMR (75 MHz)  $\delta$  149.4, 136.3, 135.4, 133.1, 133.1, 130.5, 130.5, 129.9, 129.4, 128.9, 122.9, 118.8, 114.0, 112.1, 50.6, 42.8; IR (neat) 3131, 3062, 2922, 2850, 1594, 1563, 1492, 1385, 1232, 1132, 1102 cm<sup>-1</sup>; mass spectrum (CI)  $m/z$  297.0902 [C<sub>16</sub>H<sub>14</sub>N<sub>4</sub>Cl (M+1) requires 297.0902]; LCMS purity 95%.

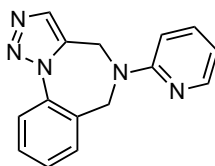

**19{6}**

**5-(Pyridin-2-yl)-5,6-dihydro-4H-benzo[f][1,2,3]triazolo[1,5-a][1,4]diazepine (19{6}).**

A mixture of amine **6** (40 mg, 0.21 mmol), 2-bromopyridine (**26{6}**) (25  $\mu$ L, 0.26 mmol), tris(dibenzylideneacetone)dipalladium(0) (7.8 mg, 8.6  $\mu$ mol), 1,3-Bis(diphenylphosphino)propane (6.8 mg, 17  $\mu$ mol) and sodium *t*-butoxide (29 mg, 0.30 mmol) in degassed toluene was stirred at 70 °C for 3 h. The cooled reaction was diluted with Et<sub>2</sub>O (20 mL) and washed with saturated aqueous NaCl (3  $\times$  10 mL). The organic layer was dried (MgSO<sub>4</sub>) and concentrated under reduced pressure, and the residue was purified by flash chromatography eluting with hexanes/EtOAc (6 : 4) to give 48 mg (85%) of 2-aminopyridine **19{6}** as a cream colored solid: mp 139-141 °C (colorless needles from *i*-PrOH); <sup>1</sup>H

NMR (400 MHz)  $\delta$  8.23 (dd,  $J = 5.1, 1.0$  Hz, 1 H), 7.97 (d,  $J = 8.2$  Hz, 1 H), 7.80 (s, 1 H), 7.58-7.49 (comp, 3 H), 7.42 (app td,  $J = 7.5, 1.0$  Hz, 1 H), 6.70-6.63 (comp, 2 H), 4.74 (s, 2 H), 4.65 (s, 2 H);  $^{13}\text{C}$  NMR (400 MHz)  $\delta$  157.3, 148.1, 137.9, 136.5, 133.5, 133.2, 130.7, 129.7, 129.6, 129.3, 122.9, 113.7, 106.4, 47.3, 40.2; IR (neat) 3056, 3008, 2924, 2853, 1594, 1564, 1483, 1436, 1388, 1311, 1293, 1232, 1163, 1133; mass spectrum (CI)  $m/z$  264.1248 [ $\text{C}_{15}\text{H}_{14}\text{N}_5$  (M+1) requires 264.1249]; LCMS purity 96%.

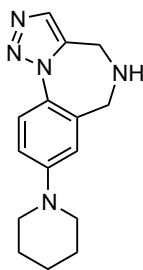

**27{I}**

**8-(Piperidin-1-yl)-5,6-dihydro-4H-benzo[f][1,2,3]triazolo[1,5-a][1,4]diazepine (27{I}).** Palladium acetate (29 mg, 0.13 mmol) was added to a solution of ( $\pm$ )-BINAP (122 mg, 0.195 mmol) in degassed toluene (17 mL) and the mixture was stirred at room temperature for 1 min. Bromide **7** (690 mg, 2.60 mmol), piperidine (**29{I}**) (2.22 g, 2.57 mL, 26.0 mmol) and then sodium *tert*-butoxide (350 mg, 3.64 mmol) were added, and the reaction was heated at 80 °C for 1 h. The reaction was cooled and filtered through a Celite<sup>®</sup> pad washing with  $\text{CH}_2\text{Cl}_2$  (80 mL). The combined filtrate and washings were concentrated under reduced pressure, and the residue was purified by flash chromatography eluting with  $\text{CH}_2\text{Cl}_2/\text{MeOH}/\text{Et}_3\text{N}$  (98 : 1 : 1  $\rightarrow$  94 : 5 : 1) to give 525 mg (75%) of amine **27{I}** as a pale brown colored solid: mp 120-122 °C (pale yellow needles from  $\text{CH}_2\text{Cl}_2/\text{hexanes}$ );  $^1\text{H}$  NMR (400 MHz)  $\delta$  7.75 (d,  $J = 8.8$  Hz, 1 H), 7.67 (s, 1 H), 7.00 (dd,  $J = 8.8, 2.7$  Hz, 1 H), 6.89 (d,  $J = 2.7$  Hz, 1 H), 4.00 (s, 2 H), 3.75 (s, 2 H), 3.26 (t,  $J = 5.5$  Hz, 4 H), 2.74 (s, 1 H), 1.76-1.67 (m, 4 H), 1.66-1.58 (m, 2 H);  $^{13}\text{C}$  NMR (100 MHz)  $\delta$  152.4, 134.7, 132.0, 131.9, 127.6, 123.6, 116.3, 115.9, 49.9, 49.3, 39.0, 25.6, 24.2; IR (neat) 3312, 2934, 2852, 2810, 1608, 1583, 1509, 1451, 1384, 1247, 1226, 1124  $\text{cm}^{-1}$ ; mass spectrum (CI)  $m/z$  270.1719 [ $\text{C}_{15}\text{H}_{20}\text{N}_5$  (M+1) requires 270.1719]; LCMS purity 96%.

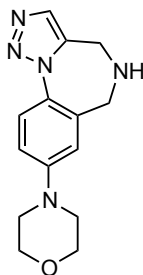

**27{2}**

**4-(5,6-Dihydro-4H-benzo[f][1,2,3]triazolo[1,5-a][1,4]diazepin-8-yl)morpholine (27{2}).**

Palladium acetate (21 mg, 0.094 mmol) was added to a solution of ( $\pm$ )-BINAP (88 mg, 0.14 mmol) in degassed toluene (12.5 mL) and the mixture was stirred at room temperature for 1 min. Amine **7** (500 mg, 1.89 mmol), morpholine (**29{2}**) (1.64 g, 1.65 mL, 18.9 mmol) and then sodium *tert*-butoxide (254 mg, 2.64 mmol) were added, and the reaction was heated at 80 °C for 1 h. The cooled reaction was filtered through Celite<sup>®</sup>, washing with CH<sub>2</sub>Cl<sub>2</sub> (50 mL). The combined filtrate and washings were concentrated under reduced pressure, and the residue was purified by flash chromatography eluting with CH<sub>2</sub>Cl<sub>2</sub>/MeOH (95 : 5  $\rightarrow$  93 : 7) to give 354 mg (69%) of amine **27{2}** as a cream colored solid: mp 150-152 °C (pale yellow microcrystals from *i*-PrOH); <sup>1</sup>H NMR (400 MHz)  $\delta$  7.81 (d,  $J$  = 8.9 Hz, 1 H), 7.67 (s, 1 H), 7.01 (dd,  $J$  = 8.9, 2.6 Hz, 1 H), 6.89 (d,  $J$  = 2.6 Hz, 1 H), 4.00 (s, 2 H), 3.88 (t,  $J$  = 4.8 Hz, 4 H), 3.77 (s, 2 H), 3.25 (t,  $J$  = 4.8 Hz, 4 H), 2.13 (s, 1 H); <sup>13</sup>C NMR (100 MHz)  $\delta$  151.7, 135.1, 132.4, 131.9, 128.8, 123.8, 115.9, 115.5, 66.8, 49.4, 48.8, 39.2; IR (neat) 3301, 2979, 2888, 2843, 1610, 1585, 1511, 1451, 1381, 1266, 1246, 1120 cm<sup>-1</sup>; mass spectrum (ESI)  $m/z$  272.15055 [C<sub>14</sub>H<sub>18</sub>N<sub>5</sub>O (M+1) requires 272.15059]; LCMS purity 94%.

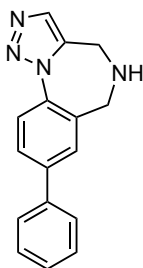

**28{1}**

**8-Phenyl-5,6-dihydro-4H-benzo[f][1,2,3]triazolo[1,5-a][1,4]diazepine (28{1}).** (All reagents were weighed out in a glove-box). A mixture of amine **7** (500 mg, 1.89 mmol), phenylboronic acid (**30{1}**) (460 mg, 3.77 mmol), bis(*tri-tert*-butylphosphine)palladium(0) (9.6 mg, 0.019 mmol) and cesium carbonate (1.23 g, 3.77 mmol) in degassed dioxane (12.5 mL) was stirred at 90 °C for 5 h. The



cooled reaction was diluted with CH<sub>2</sub>Cl<sub>2</sub> (20 mL) and filtered through Celite<sup>®</sup>, washing with CH<sub>2</sub>Cl<sub>2</sub> (80 mL). The combined filtrate and washings were concentrated under reduced pressure, and the residue was purified by flash chromatography eluting with CH<sub>2</sub>Cl<sub>2</sub>/MeOH (97 : 3 → 19 : 1) to give 414 mg (84%) of biphenyl **28**{1} as a cream colored solid: mp 120-122 °C (pale yellow prisms from *i*-PrOH); <sup>1</sup>H NMR (300 MHz) δ 7.99 (d, *J* = 8.2 Hz, 1 H), 7.74-7.67 (comp, 2 H), 7.64-7.57 (comp, 3 H), 7.46 (app t, *J* = 7.2 Hz, 2 H), 7.38 (t, *J* = 7.2 Hz, 1 H), 4.05 (s, 2 H), 3.86 (s, 2 H), 2.56 (s, 1 H); <sup>13</sup>C NMR (75 MHz) δ 142.1, 139.5, 135.7, 135.6, 132.1, 131.8, 129.0, 128.7, 128.0, 127.8, 127.1, 123.2, 49.1, 39.3; IR (neat) 3302, 3034, 2977, 2681, 1512, 1488, 1453, 1435, 1228, 1142, 1124 cm<sup>-1</sup>; mass spectrum (ESI) *m/z* 163.1290 [C<sub>16</sub>H<sub>15</sub>N<sub>4</sub> (M+1) requires 263.1291]; LCMS purity 100%.

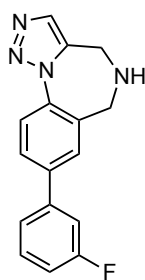

**28**{2}

**8-Phenyl-5,6-dihydro-4H-benzo[f][1,2,3]triazolo[1,5-a][1,4]diazepine (28**{2}). A mixture of bromide **7** (350 mg, 1.32 mmol), 3-fluorophenylboronic acid (**30**{2}) (369 mg, 2.64 mmol), bis(tri-*tert*-butylphosphine)palladium(0) (6.7 mg, 0.013 mmol) and cesium carbonate (860 mg, 2.64 mmol) in degassed dioxane (9.0 mL) was stirred at 90 °C for 5 h. The reaction was cooled, and diluted with water (20 mL), and the mixture was extracted with CH<sub>2</sub>Cl<sub>2</sub> (3 × 20 mL). The combined organic extracts were dried (MgSO<sub>4</sub>) and concentrated under reduced pressure, and the residue was purified by flash chromatography eluting with CH<sub>2</sub>Cl<sub>2</sub>/MeOH (19 : 1) to give 344 mg (93%) of biphenyl **28**{2} as a colorless solid: mp 162-164 °C (colorless prisms from *i*-PrOH); <sup>1</sup>H NMR (400 MHz) δ 8.02 (d, *J* = 8.2 Hz, 1 H), 7.73-7.68 (comp, 2 H), 7.60 (d, *J* = 2.2 Hz, 1 H), 7.48-7.38 (comp, 2 H), 7.32 (dd, *J* = 9.8, 1.8 Hz, 1 H), 7.12-7.06 (m, 1 H), 4.08 (s, 2 H), 3.90 (s, 2 H), 2.24 (s, 1 H); <sup>13</sup>C NMR (100 MHz) δ 161.2 (d, *J*<sub>C-F</sub> = 246.8 Hz), 141.8 (d, *J*<sub>C-F</sub> = 7.5 Hz), 140.8 (d, *J*<sub>C-F</sub> = 2.2 Hz), 136.3, 135.7, 132.2, 132.1, 130.6 (d, *J*<sub>C-F</sub> = 8.2 Hz), 128.8, 127.8, 123.4, 122.8 (d, *J*<sub>C-F</sub> = 2.2 Hz), 114.9 (d, *J*<sub>C-F</sub> = 20.9 Hz), 114.1 (d, *J*<sub>C-F</sub> = 21.7 Hz), 49.3, 39.5; IR (neat) 3282, 3058, 2921, 1613, 1581, 1512, 1484, 1439, 1402, 1265, 1229, 1200, 1164, 1127 cm<sup>-1</sup>; mass spectrum (CI) *m/z* 281.1203 [C<sub>16</sub>H<sub>14</sub>N<sub>4</sub>F (M+1) requires 281.1202]; LCMS purity 99%.

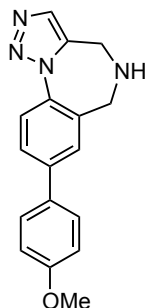

**28{5}**

**8-(4-Methoxyphenyl)-5,6-dihydro-4H-benzo[f][1,2,3]triazolo[1,5-a][1,4]diazepine (28{5}).**

(All reagents were weighed out in a glove-box). A mixture of amine **7** (500 mg, 1.89 mmol), 4-methoxyphenylboronic acid (**30{5}**) (573 mg, 3.77 mmol), bis(tri-*tert*-butylphosphine)palladium(0) (9.6 mg, 0.019 mmol) and cesium carbonate (1.23 g, 3.77 mmol) in degassed dioxane (12.5 mL) was stirred at 90 °C for 5 h. The reaction was cooled and diluted with CH<sub>2</sub>Cl<sub>2</sub> (20 mL) and the solids were removed by vacuum filtration through Celite<sup>®</sup>, washing with CH<sub>2</sub>Cl<sub>2</sub> (100 mL). The combined filtrate and washings were concentrated under reduced pressure, and the residue was purified by flash chromatography eluting with CH<sub>2</sub>Cl<sub>2</sub>/MeOH (97 : 3 → 19 : 1) to give 430 mg (78%) of biphenyl **28{5}** as a colorless solid: mp 184-185 °C (colorless plates from *i*-PrOH); <sup>1</sup>H NMR (400 MHz) δ 7.99 (d, *J* = 8.2 Hz, 1 H), 7.72 (s, 1 H), 7.70 (dd, *J* = 8.2, 2.1 Hz, 1 H), 7.60-7.55 (comp, 3 H), 7.02 (d, *J* = 8.9 Hz, 2 H), 4.07 (s, 2 H), 3.89 (s, 2 H), 3.88 (s, 3 H); <sup>13</sup>C NMR (300 MHz) δ 159.8, 141.8, 135.6, 135.3, 132.2, 132.1, 131.8, 128.3 (2C), 127.4, 123.3, 114.5, 55.5, 49.3, 39.4; IR (neat) 3334, 2911, 2838, 1605, 1496, 1433, 1361, 1244, 1226, 1182, 1139, 1188, 1017 cm<sup>-1</sup>; mass spectrum (ESI) *m/z* 293.1399 [C<sub>17</sub>H<sub>17</sub>N<sub>4</sub>O (M+1) requires 293.1397]; LCMS purity 100%.

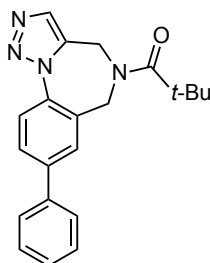

**32{1,4}**

**2,2-Dimethyl-1-(8-phenyl-4H-benzo[f][1,2,3]triazolo[1,5-a][1,4]diazepin-5(6H)-yl)propan-1-one (32{1,4}).** A solution of pivaloyl chloride (**20{4}**) (28 mg, 28 μL, 0.23 mmol), amine **28{1}** (30 mg, 0.11 mmol) and triethylamine (35 mg, 48 μL, 0.34 mmol) in anhydrous CH<sub>2</sub>Cl<sub>2</sub> (1.0 mL) was

stirred at room temperature for 16 h. The reaction was diluted with CH<sub>2</sub>Cl<sub>2</sub> (20 mL), and the mixture washed with aqueous HCl (10 mL, 1.0 M) and saturated aqueous NaHCO<sub>3</sub> (10 mL). The organic layer was dried (MgSO<sub>4</sub>) and concentrated under reduced pressure, and the residue was purified by flash chromatography eluting with hexanes/EtOAc (1 : 1) to give 40 mg (quant.) of amide **32**{1,4} as a colorless solid: mp 169-171 °C; <sup>1</sup>H NMR (400 MHz) δ 8.04 (d, *J* = 8.2 Hz, 1 H), 7.83-7.78 (comp, 2 H), 7.71 (d, *J* = 2.0 Hz, 1 H), 7.61 (d, *J* = 7.4 Hz, 2 H), 7.49 (app t, *J* = 7.4 Hz, 2 H), 7.42 (t, *J* = 7.4 Hz, 1 H), 4.76 (s, 2 H), 4.62 (s, 2 H), 1.43 (s, 9 H); <sup>13</sup>C NMR (75 MHz) 176.7, 142.8, 139.3, 135.4, 133.3, 132.5, 129.3, 129.2, 128.9, 128.7, 128.4, 127.3, 123.3, 48.5, 39.5, 39.2, 28.7; IR (neat) 2973, 1628, 1489, 1407, 1383, 1366, 1174 cm<sup>-1</sup>; mass spectrum (ESI) *m/z* 347.1867 [C<sub>21</sub>H<sub>23</sub>N<sub>4</sub>O (M+1) requires 347.1866]; LCMS purity 99%.

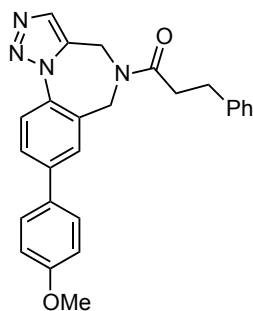

**32**{5,13}

**3-Phenyl-1-(8-phenyl-4H-benzo[f][1,2,3]triazolo[1,5-a][1,4]diazepin-5(6H)-yl)propan-1-one**

(**32**{5,13}). A solution of hydrocinnamoyl chloride (**20**{13}) (29 mg, 25 μL, 0.23 mmol), amine **28**{5} (25 mg, 0.086 mmol) and triethylamine (26 mg, 36 μL, 0.26 mmol) in anhydrous CH<sub>2</sub>Cl<sub>2</sub> (1.0 mL) was stirred at room temperature for 16 h. The reaction was diluted with CH<sub>2</sub>Cl<sub>2</sub> (20 mL), and the mixture was washed with aqueous HCl (10 mL, 1.0 M) and saturated aqueous NaHCO<sub>3</sub> (10 mL). The organic layer was dried (MgSO<sub>4</sub>) and concentrated under reduced pressure, and the residue was purified by flash chromatography eluting with hexanes/EtOAc (4 : 6) to give 31 mg (85%) of amide **32**{5,13} as a colorless oil: <sup>1</sup>H NMR (400 MHz) (rotamers) δ 8.00 (d, *J* = 8.2 Hz, 0.6 H), 7.95 (d, *J* = 8.8 Hz, 0.4 H), 7.79 (s, 1 H), 7.76-7.71 (comp, 1.4 H), 7.68 (s, 1 H), 7.58 (d, *J* = 8.7 Hz, 0.8 H), 7.52 (d, *J* = 8.7 Hz, 1.2 H), 7.45 (d, *J* = 2.0 Hz, 0.6 H), 7.31-7.15 (comp, 5 H), 7.01 (d, *J* = 8.7 Hz, 1 H), 3.08-2.98 (m, 2 H), 2.85 (t, *J* = 7.7 Hz, 1.2 H), 2.70 (t, *J* = 7.5 Hz, 0.8 H); <sup>13</sup>C NMR (75 MHz) 171.2, 171.1, 160.0, 142.5, 140.9, 140.8, 134.7, 133.6, 133.2, 132.4, 131.6, 131.4, 129.2, 129.1, 128.8, 128.7, 128.6, 128.4, 128.3, 128.1, 128.0, 126.6, 123.7, 123.2, 114.6, 55.5, 48.5, 44.9, 40.0, 37.8, 35.9, 31.4; IR (neat) 2925, 2853,

1649, 1607, 1499, 1454, 1417, 1250  $\text{cm}^{-1}$ ; mass spectrum (ESI)  $m/z$  425.1975 [ $\text{C}_{26}\text{H}_{25}\text{N}_4\text{O}_2$  (M+1) requires 425.1972]; LCMS purity 98%.

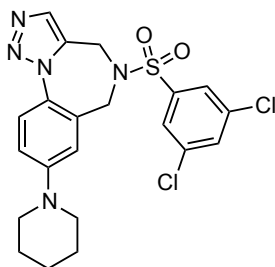

**33{1,11}**

**5-(3,5-Dichlorophenylsulfonyl)-8-(piperidin-1-yl)-5,6-dihydro-4H-benzo[f][1,2,3]triazolo[1,5-a][1,4]diazepine. (33{1,11}).** A solution of 3,5-dichlorobenzenesulfonyl chloride (**21{11}**) (37 mg, 0.15 mmol), amine **27{1}** (20 mg, 0.074 mmol) and triethylamine (23 mg, 31  $\mu\text{L}$ , 0.22 mmol) in anhydrous  $\text{CH}_2\text{Cl}_2$  (1.0 mL) was stirred at room temperature for 4 h. The reaction was diluted with  $\text{CH}_2\text{Cl}_2$  (20 mL), and the mixture was washed with saturated aqueous  $\text{NaHCO}_3$  (10 mL). The organic layer was dried ( $\text{MgSO}_4$ ) and concentrated under reduced pressure, and the residue was purified by flash chromatography eluting with hexanes/EtOAc (7 : 3) to give 31 mg (87%) of sulfonamide **33{1,11}** as a colorless solid: mp 219-220  $^\circ\text{C}$ ;  $^1\text{H}$  NMR (400 MHz)  $\delta$  7.69 (d,  $J = 1.8$  Hz, 2 H), 7.66 (d,  $J = 8.8$  Hz, 1 H), 7.61 (s, 1 H), 7.54 (t,  $J = 1.8$  Hz, 1 H), 7.01 (dd,  $J = 8.8, 2.7$  Hz, 1 H), 6.84 (d,  $J = 2.7$  Hz, 1 H), 4.50 (s, 2 H), 4.18 (s, 2 H), 3.27 (t,  $J = 5.4$  Hz, 4 H), 1.78-1.60 (comp, 6 H);  $^{13}\text{C}$  NMR (100 MHz) 152.7, 140.8, 136.5, 133.3, 132.8, 130.0, 126.7, 126.3, 125.8, 124.1, 116.9, 116.6, 49.6, 49.3, 39.6, 25.6, 24.2; IR (neat) 3076, 2936, 2854, 1609, 1568, 1514, 1361, 1344, 1248, 1171, 1140  $\text{cm}^{-1}$ ; mass spectrum (ESI)  $m/z$  478.0869 [ $\text{C}_{21}\text{H}_{22}\text{N}_5\text{O}_2\text{SCl}_2$  (M+1) requires 478.0866]; LCMS purity 96%.

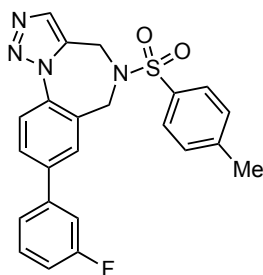

**34{2,5}**

**8-(3-Fluorophenyl)-5-tosyl-5,6-dihydro-4H-benzo[f][1,2,3]triazolo[1,5-a][1,4]diazepine (34{2,5}).** A solution of tosyl chloride (**21{5}**) (34 mg, 0.18 mmol), amine **28{2}** (25 mg, 0.089 mmol)

and triethylamine (27 mg, 37  $\mu$ L, 0.27 mmol) in anhydrous  $\text{CH}_2\text{Cl}_2$  (1.0 mL) was stirred at room temperature for 4 h. The reaction was diluted with  $\text{CH}_2\text{Cl}_2$  (20 mL), and the mixture was washed with aqueous HCl (10 mL, 1.0 M) and saturated aqueous  $\text{NaHCO}_3$  (10 mL). The organic layer was dried ( $\text{MgSO}_4$ ) and concentrated under reduced pressure, and the residue was purified by flash chromatography eluting with hexanes/EtOAc (6 : 4  $\rightarrow$  4 : 6) to give 39 mg (quant.) of sulfonamide **34**{2,5} as a colorless solid: mp 207  $^\circ\text{C}$  (dec.);  $^1\text{H}$  NMR (400 MHz)  $\delta$  7.90 (d,  $J = 8.2$  Hz, 1 H), 7.76-7.70 (comp, 3 H), 7.58 (s, 1 H), 7.52 (d,  $J = 2.0$  Hz, 1 H), 7.47 (app td,  $J = 8.1, 6.0$  Hz, 1 H), 7.37-7.33 (m, 1 H), 7.30 (d,  $J = 8.0$  Hz, 2 H), 7.24 (app dt,  $J = 10.0, 2.2$  Hz, 1 H), 7.13 (app tdd,  $J = 8.1, 2.2, 0.7$  Hz, 1 H), 4.55 (s, 2 H), 4.26 (s, 2 H), 2.37 (s, 3 H);  $^{13}\text{C}$  NMR (75 MHz) 163.3 (d,  $J_{\text{C-F}} = 245.3$  Hz), 144.7, 141.5, 141.3, (d,  $J_{\text{C-F}} = 7.7$  Hz), 135.5, 134.7, 133.3, 130.9, 130.8 (d,  $J_{\text{C-F}} = 8.2$  Hz), 130.2, 129.9, 129.1, 127.6, 127.0, 123.6, 122.9 (d,  $J_{\text{C-F}} = 3.2$  Hz), 115.3 (d,  $J_{\text{C-F}} = 20.7$  Hz), 114.2 (d,  $J_{\text{C-F}} = 21.9$  Hz), 48.6, 39.4, 21.6; IR (neat) 3065, 2923, 2853, 1612.6, 1582, 1485, 1355, 1338, 1164, 1090  $\text{cm}^{-1}$ ; mass spectrum (ESI)  $m/z$  435.1287 [ $\text{C}_{23}\text{H}_{20}\text{N}_4\text{O}_2\text{FS}$  (M+1) requires 435.1286]; LCMS purity 100%.

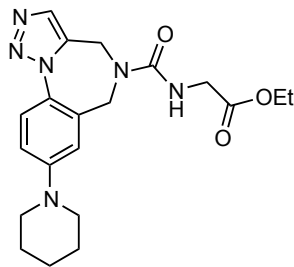

**35**{1,2}

**Ethyl 2-(8-(piperidin-1-yl)-5,6-dihydro-4H-benzo[f][1,2,3]triazolo[1,5-a][1,4]diazepine-5-carboxamido)acetate (35**{1,2}). A solution of ethyl isocyanatoacetate (**22**{2}) (24 mg, 21  $\mu$ L, 0.19 mmol) and amine **27**{1} (25 mg, 0.093 mmol) in anhydrous  $\text{CH}_2\text{Cl}_2$  (1.0 mL) was stirred at room temperature for 6 h. The reaction was diluted with  $\text{CH}_2\text{Cl}_2$  (20 mL) and the mixture was washed with saturated aqueous  $\text{NaHCO}_3$  (20 mL). The organic layer was dried ( $\text{MgSO}_4$ ) and concentrated under reduced pressure, and the residue was purified by flash chromatography eluting with hexanes/EtOAc (1 : 9) to give 34 mg (92%) of urea **35**{1,2} as a colorless foam:  $^1\text{H}$  NMR (400 MHz)  $\delta$  7.75 (d,  $J = 8.8$  Hz, 1 H), 7.74 (s, 1 H), 7.01 (dd,  $J = 8.8, 2.6$  Hz, 1 H), 6.96 (d,  $J = 2.6$  Hz, 1 H), 5.33 (t,  $J = 5.1$  Hz, 1 H), 4.61 (s, 2 H), 4.36 (s, 2 H), 4.22 (q,  $J = 7.1$  Hz, 2 H), 4.03 (d,  $J = 5.1$  Hz, 2 H), 3.27 (t,  $J = 5.4$  Hz, 4 H), 1.75-1.66 (comp, 4 H), 1.66-1.58 (comp, 2 H), 1.29 (t,  $J = 7.1$  Hz, 3 H);  $^{13}\text{C}$  NMR (100 MHz)  $\delta$  171.1, 156.5, 152.1, 132.9, 131.8, 129.6, 127.2, 123.9, 116.8, 116.5, 61.6, 50.1, 47.2, 43.0, 38.7, 25.5, 24.2,

14.3; IR (neat) 3332, 2936, 2855, 1747, 1643, 1609, 1538, 1516, 1388, 1248, 1196, 1023  $\text{cm}^{-1}$ ; mass spectrum (ESI)  $m/z$  399.2142 [ $\text{C}_{20}\text{H}_{27}\text{N}_6\text{O}_3$  (M+1) requires 399.2139]; LCMS purity 95%.

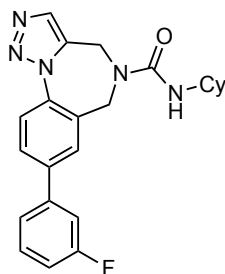

**36{2,3}**

***N*-Cyclohexyl-8-(3-fluorophenyl)-4*H*-benzo[*f*][1,2,3]triazolo[1,5-*a*][1,4]diazepine-5(6*H*)-carboxamide (36{2,3})**. A solution of cyclohexyl isocyanate (**22{3}**) (22 mg, 23  $\mu\text{L}$ , 0.18 mmol) and amine **28{2}** (25 mg, 0.089 mmol) in anhydrous  $\text{CH}_2\text{Cl}_2$  (1.0 mL) was stirred at room temperature for 4 h. The reaction was diluted with  $\text{CH}_2\text{Cl}_2$  (20 mL) and the mixture was washed with aqueous HCl (20 mL, 1.0 M) and saturated aqueous  $\text{NaHCO}_3$  (20 mL). The organic layer was dried ( $\text{MgSO}_4$ ) and concentrated under reduced pressure, and the residue was purified by flash chromatography eluting with hexanes/EtOAc (3 : 7) to give 36 mg (quant.) of urea **36{2,3}** as a colorless solid: mp 175  $^\circ\text{C}$  (dec.);  $^1\text{H}$  NMR (400 MHz)  $\delta$  8.04 (d,  $J = 8.2$  Hz, 1 H), 7.80 (s, 1 H), 7.75 (dd,  $J = 8.2, 2.1$  Hz, 1 H), 7.71 (d,  $J = 2.1$  Hz, 1 H), 7.48-7.38 (comp, 2 H), 7.32 (app dt,  $J = 9.8, 1.9$  Hz, 1 H), 7.14-7.07 (m, 1 H), 4.65 (s, 2 H), 4.48 (s, 2 H), 4.40 (d,  $J = 7.4$  Hz, 1 H), 3.68 (tdt,  $J = 11.0, 7.4, 3.8$  Hz, 1 H), 1.97 (dd,  $J = 8.4, 3.8$  Hz, 2 H), 1.78-1.56 (comp, 3 H), 1.45-1.29 (m, 2 H), 1.24-1.05 (comp, 3 H);  $^{13}\text{C}$  NMR (100 MHz)  $\delta$  163.3 (d,  $J_{\text{C-F}} = 244.8$  Hz), 156.1, 141.5 (d,  $J_{\text{C-F}} = 8.2$  Hz), 141.3, 135.8, 133.3, 132.6, 130.7 (d,  $J_{\text{C-F}} = 8.9$  Hz), 129.7, 129.3, 128.5, 123.6, 123.0 (d,  $J_{\text{C-F}} = 2.3$  Hz), 115.2 (d,  $J_{\text{C-F}} = 20.9$  Hz), 114.2 (d,  $J_{\text{C-F}} = 22.3$  Hz), 50.1, 46.7, 39.0, 34.1, 25.7, 25.1; IR (neat) 3240, 2930, 2853, 1624, 1614, 1538, 1485, 1451, 1395, 1249, 1238  $\text{cm}^{-1}$ ; mass spectrum (ESI)  $m/z$  406.2042 [ $\text{C}_{23}\text{H}_{25}\text{N}_5\text{OF}$  (M+1) requires 406.2038]; LCMS purity 99%.

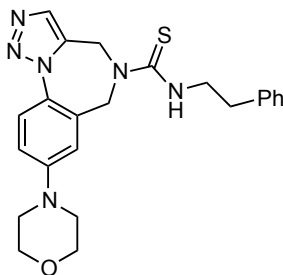

**37{2,3}**

**8-Morpholino-*N*-phenethyl-4*H*-benzo[*f*][1,2,3]triazolo[1,5-*a*][1,4]diazepine-5(6*H*)-carbothioamide (37{2,3}).** A solution of phenethyl isothiocyanate (**23{3}**) (26 mg, 24  $\mu$ L, 0.16 mmol) and amine **27{2}** (22 mg, 0.081 mmol) in anhydrous  $\text{CH}_2\text{Cl}_2$  (1.0 mL) was stirred at room temperature for 3.5 h. The reaction was diluted with  $\text{CH}_2\text{Cl}_2$  (20 mL) and the mixture was washed with saturated aqueous  $\text{NaHCO}_3$  (20 mL). The organic layer was dried ( $\text{MgSO}_4$ ) and concentrated under reduced pressure, and the residue was purified by flash chromatography eluting with hexanes/EtOAc (3 : 7) to give 33 mg (92%) of thiourea **37{2,3}** as a colorless glass:  $^1\text{H}$  NMR (400 MHz)  $\delta$  7.82 (d,  $J = 8.8$  Hz, 1 H), 7.71 (s, 1 H), 7.31 (app t,  $J = 7.1$  Hz, 2 H), 7.27-7.19 (comp, 3 H), 7.09 (dd,  $J = 8.8, 2.4$  Hz, 1 H), 7.05 (d,  $J = 2.4$  Hz, 1 H), 5.77-5.70 (m, 1 H), 4.80 (s, 2 H), 4.78 (s, 2 H), 3.98-3.87 (comp, 6 H), 3.25 (t,  $J = 4.8$  Hz, 4 H), 2.98 (t,  $J = 6.9$  Hz, 2 H);  $^{13}\text{C}$  NMR (100 MHz)  $\delta$  181.6, 151.2, 138.8, 133.3, 131.1, 129.2, 128.9 (2C), 128.2, 126.9, 123.7, 117.0, 116.5, 66.5, 50.5, 49.0, 47.4, 42.2, 35.0; IR (neat) 3286, 2963, 2924, 2857, 1609, 1588, 1516, 1451, 1379, 1342, 1248, 1225, 1121  $\text{cm}^{-1}$ ; mass spectrum (ESI)  $m/z$  435.1963 [ $\text{C}_{23}\text{H}_{27}\text{N}_6\text{OS}$  (M+1) requires 435.1962]; LCMS purity 94%.

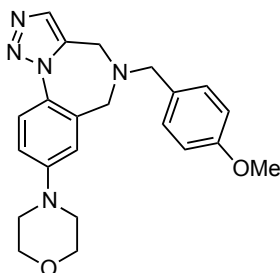

**39{2,14}**

**4-(5-(4-Methoxybenzyl)-5,6-dihydro-4*H*-benzo[*f*][1,2,3]triazolo[1,5-*a*][1,4]diazepin-8-yl)morpholine (39{2,14}).** A mixture of sodium triacetoxyborohydride (141 mg, 0.663 mmol), amine **27{2}** (30 mg, 0.11 mmol), *p*-anisaldehyde (**25{14}**) (90 mg, 81  $\mu$ L, 0.66 mmol) and glacial acetic acid (7 mg, 6  $\mu$ L, 0.1 mmol) in DCE (3.0 mL) was stirred at room temperature for 14 h. The reaction was diluted with  $\text{CH}_2\text{Cl}_2$  (30 mL) and saturated aqueous  $\text{NaHCO}_3$  (20 mL), and the layers were separated.

The aqueous layer was extracted with CH<sub>2</sub>Cl<sub>2</sub> (10 mL), and the combined organic layers were concentrated under reduced pressure. The residue was dissolved in Et<sub>2</sub>O (20 mL), and the solution was extracted with aqueous HCl (3 × 20 mL, 1.0 M). The combined aqueous extracts were washed with Et<sub>2</sub>O (20 mL). The pH of the aqueous layer was then raised to ~ 11-12 by adding aqueous NaOH (1.0 M), and the resulting solution was extracted with CH<sub>2</sub>Cl<sub>2</sub> (3 × 20 mL). The combined organic extracts were dried (MgSO<sub>4</sub>) and concentrated under reduced pressure, and the residue was purified by flash chromatography eluting with hexanes/EtOAc (3 : 7 → 1 : 9) to give 34 mg (79%) of amine **39**{2,14} as a pale yellow oil: <sup>1</sup>H NMR (400 MHz) δ 7.78 (d, *J* = 8.9 Hz, 1 H), 7.70 (s, 1 H), 7.30 (d, *J* = 8.7 Hz, 2 H), 7.03 (dd, *J* = 8.9, 2.7 Hz, 1 H), 6.91 (d, *J* = 8.89 Hz, 2 H), 6.87 (d, *J* = 2.7 Hz, 1 H), 3.89 (t, *J* = 4.8 Hz, 4 H), 3.83 (s, 3 H), 3.67 (s, 2 H), 3.65 (s, 2 H), 3.49 (s, 2 H), 3.26 (t, *J* = 4.8 Hz, 4 H); <sup>13</sup>C NMR (100 MHz) δ 159.2, 151.5, 132.8, 132.7, 130.3, 129.8, 129.6, 128.6, 123.4, 116.9, 115.6, 114.0 66.7, 59.8, 55.3, 54.9, 48.7, 44.3; IR (neat) 2960, 2912, 2835, 1611, 1512, 1452, 1247, 1123 cm<sup>-1</sup>; mass spectrum (ESI) *m/z* 392.2083 [C<sub>22</sub>H<sub>26</sub>N<sub>5</sub>O<sub>2</sub> (M+1) requires 392.2081]; LCMS purity 97%.

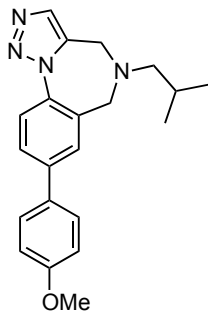

**40**{5,2}

**5-Isobutyl-8-(4-methoxyphenyl)-5,6-dihydro-4*H*-benzo[*f*][1,2,3]triazolo[1,5-*a*][1,4]diazepine (40**{5,2}). A mixture of sodium triacetoxyborohydride (139 mg, 0.657 mmol), amine **28**{5} (32 mg, 0.11 mmol), isobutyraldehyde (**25**{2}) (47 mg, 60 μL, 0.66 mmol) and glacial acetic acid (7 mg, 6 μL, 0.1 mmol) in DCE (3.0 mL) was stirred at room temperature for 14 h. The reaction was diluted with CH<sub>2</sub>Cl<sub>2</sub> (30 mL) and saturated aqueous NaHCO<sub>3</sub> (20 mL), and the layers were separated. The aqueous layer was extracted with CH<sub>2</sub>Cl<sub>2</sub> (10 mL), and the combined organic layers were dried (MgSO<sub>4</sub>) and concentrated under reduced pressure. The residue was purified by flash chromatography eluting with hexanes/EtOAc (6 : 4) to give 36 mg (94%) of amine **40**{5,2} as a colorless oil: <sup>1</sup>H NMR (400 MHz) δ 7.94 (d, *J* = 8.2 Hz, 1 H), 7.75 (s, 1 H), 7.70 (dd, *J* = 8.2, 2.1 Hz, 1 H), 7.61-7.54 (comp, 3 H), 7.02 (d, *J* = 8.8 Hz, 2 H), 3.87 (s, 3 H), 3.70 (s, 2 H), 3.58 (s, 2 H), 2.31 (d, *J* = 6.8 Hz, 2 H), 1.84 (app nonet, *J* = 6.8 Hz, 1 H), 0.97 (d, *J* = 6.8 Hz, 6 H); <sup>13</sup>C NMR (100 MHz) δ 159.8, 141.7, 135.3, 133.8, 133.0, 132.2,



129.6, 129.2, 128.4, 127.6, 123.0, 114.6, 64.6, 55.6, 55.5, 45.5, 26.3, 20.9; IR (neat) 2956, 2870, 2836, 1608, 1497, 1463, 1250, 1182  $\text{cm}^{-1}$ ; mass spectrum (ESI)  $m/z$  349.2025 [ $\text{C}_{21}\text{H}_{25}\text{N}_4\text{O}$  (M+1) requires 349.2023]; LCMS purity 95%.

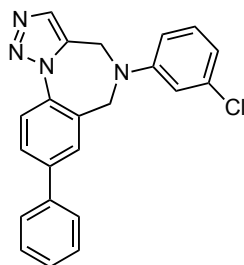

**42{1,1}**

**5-(3-Chlorophenyl)-8-phenyl-5,6-dihydro-4H-benzo[f][1,2,3]triazolo[1,5-a][1,4]diazepine**

**(42{1,1})**. Palladium acetate (1.3 mg, 5.7  $\mu\text{mol}$ ) was added to a solution of ( $\pm$ )-BINAP (5.3 mg, 8.6  $\mu\text{mol}$ ) in degassed toluene (1.0 mL), and the mixture was stirred at room temperature for 1 min. Amine **28{1}** (30 mg, 0.11 mmol), 1-bromo-3-chlorobenzene (**26{1}**) (44 mg, 27  $\mu\text{L}$ , 0.23 mmol) and then sodium *tert*-butoxide (15 mg, 0.16 mmol) were added, and the reaction was heated at 80  $^{\circ}\text{C}$  for 2 h. The reaction was cooled and diluted with  $\text{CH}_2\text{Cl}_2$  (5 mL), and the mixture was filtered through a Celite<sup>®</sup> pad washing with  $\text{CH}_2\text{Cl}_2$  (40 mL). The combined filtrate and washings were concentrated under reduced pressure, and the residue was purified by flash chromatography eluting with hexanes/EtOAc (7 : 3) to give 40 mg (94%) of amine **42{1,1}** as a colorless solid: mp 184  $^{\circ}\text{C}$  (dec.);  $^1\text{H}$  NMR (400 MHz)  $\delta$  8.07 (d,  $J = 8.4$  Hz, 1 H), 7.81 (s, 1 H), 7.75 (dd,  $J = 8.4, 2.0$  Hz, 1 H), 7.66 (d,  $J = 2.0$  Hz, 1 H), 7.60 (d,  $J = 7.2$  Hz, 1 H), 7.48 (app t,  $J = 7.2$  Hz, 2 H), 7.40 (t,  $J = 7.2$  Hz, 1 H), 7.21 (app t,  $J = 8.1$  Hz, 1 H), 6.90 (app t,  $J = 2.2$  Hz, 1 H), 6.84-6.79 (comp, 2 H), 4.52 (s, 2 H), 4.42 (s, 2 H);  $^{13}\text{C}$  NMR (100 MHz)  $\delta$  149.3, 142.4, 139.3, 135.4, 135.2, 133.1, 133.0, 130.4, 129.2, 129.0 (2C), 128.4, 128.2, 127.2, 123.2, 118.9, 114.1, 112.1, 50.9, 42.8; IR (neat) 3060, 2924, 2851, 1594, 1564, 1488, 1383, 1230, 1102  $\text{cm}^{-1}$ ; mass spectrum (ESI)  $m/z$  373.1215 [ $\text{C}_{22}\text{H}_{18}\text{N}_4\text{Cl}$  (M+1) requires 373.1215]; LCMS purity 95%.

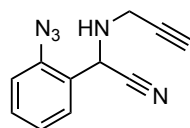

**43**

**2-(2-(Benzo[d][1,3]dioxol-5-ylmethyl)phenyl)-2-(prop-2-ynylamino)acetonitrile (43).**

Aqueous HCl (4.28 mL, 1.0 M, 4.28 mmol) was added dropwise to a solution of 2-azido-benzaldehyde (**4**) (600 mg, 4.08 mmol),<sup>4</sup> propargylamine (236 mg, 274  $\mu\text{L}$ , 4.28 mmol) and sodium cyanide (210 mg,

4.28 mmol) in MeOH (8.6 mL) and the reaction stirred at room temperature for 2.5 h. The reaction was diluted with H<sub>2</sub>O (50 mL) and the pH raised to 10 with aqueous NaOH (*ca.* 300  $\mu$ L, 1.0 M). The resulting mixture was extracted with EtOAc (3  $\times$  70 mL) and the combined organic layers were dried (MgSO<sub>4</sub>) and concentrated under reduced pressure. The residue was purified by flash chromatography eluting with hexanes/Et<sub>2</sub>O (4 : 1  $\rightarrow$  3 : 2) to give 673 mg of amine **43** (78%) as an orange oil: <sup>1</sup>H NMR (500 MHz) 7.53 (dd, *J* = 7.6, 1.5 Hz, 1 H), 7.45 (ddd, *J* = 8.1, 7.6, 1.5 Hz, 1 H), 7.22 (dd, *J* = 8.1, 1.5 Hz, 1 H), 7.20 (app td *J* = 7.6, 1.5 Hz, 1 H), 5.11 (d, *J* = 7.5 Hz, 1 H), 3.62 (m, 2 H), 2.34 (t, *J* = 2.5 Hz, 1 H) 2.00 (m, 1 H); <sup>13</sup>C NMR (100 MHz) 138.1, 130.8, 129.4, 125.4, 125.2, 118.7, 117.9, 79.6, 73.2, 48.6, 36.5; IR (neat) 3295, 2132, 1586, 1491, 1452, 1297, 1106 cm<sup>-1</sup>; mass spectrum (CI) *m/z* 212.0940 [C<sub>11</sub>H<sub>10</sub>N<sub>5</sub> (M+1) requires 212.0936], 185, 157.

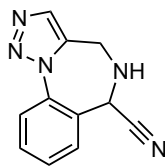

**44**

**5,6-Dihydro-4H-benzof[1,2,3]triazolo[1,5-a][1,4]diazepine-6-carbonitrile (44).** A solution of amine **43** (667 mg, 3.02 mmol) in toluene (158 mL) was stirred at 60 °C for 34 h. The cooled reaction was concentrated under reduced pressure, and the residue was purified by flash chromatography eluting with toluene/EtOAc (1 : 1  $\rightarrow$  0 : 1) to give 589 mg of amine **44** (88%) as a colorless solid: mp 133 °C (dec.) (colorless needles from hexanes/CH<sub>2</sub>Cl<sub>2</sub>); <sup>1</sup>H NMR (300 MHz, d<sub>6</sub>-DMSO)  $\delta$  7.94 (d, *J* = 7.9 Hz, 1 H), 7.90 (s, 1 H), 7.75-7.66 (comp, 2 H), 7.61 (app t, *J* = 7.2 Hz, 1 H), 5.49 (d, *J* = 5.1 Hz, 1 H), 4.20 (ddd, *J* = 6.3, 5.1, 4.9 Hz, 1 H), 4.10 (dd, *J* = 14.6, 4.9 Hz, 1 H), 3.73 (dd, *J* = 14.6, 6.3 Hz, 1 H); <sup>13</sup>C NMR (75 MHz, d<sub>6</sub>-DMSO) 135.4, 135.2, 132.2, 131.0, 130.1, 129.7, 127.0, 123.4, 119.2, 48.9, 36.7; IR (neat) 3312, 2920, 2851, 1495, 1469, 1230, 1136, 1095 cm<sup>-1</sup>; mass spectrum (CI) *m/z* 212.0940 [C<sub>11</sub>H<sub>10</sub>N<sub>5</sub> (M+1) requires 212.0936], 185; LCMS purity 93%.

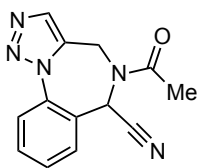

**45{1}**

**5-Acetyl-5,6-dihydro-4H-benzof[1,2,3]triazolo[1,5-a][1,4]diazepine-6-carbonitrile (45{1}).** Acetyl chloride (**20{1}**) (15 mg, 13  $\mu$ L, 0.19 mmol) was added to a solution of amine **43** (20 mg, 0.095

mmol) and pyridine (22 mg, 23  $\mu$ L, 0.28 mmol) in anhydrous MeCN (1.0 mL) and the reaction stirred at room temperature for 36 h. The mixture was concentrated under reduced pressure, and the residue purified by flash chromatography eluting with EtOAc to give 23 mg of amide **45**{I} (96 %) as a cream colored solid: mp 196-197  $^{\circ}$ C (colorless needles from toluene);  $^1$ H NMR (500 MHz,  $d_6$ -DMSO, 120  $^{\circ}$ C)  $\delta$  8.00 (dd,  $J$  = 7.6, 1.2 Hz, 1 H), 8.00 (s, 1 H), 7.83 (dd,  $J$  = 7.6, 1.4 Hz, 1 H), 7.79 (app td,  $J$  = 7.6, 1.4 Hz, 1 H), 7.63 (app td,  $J$  = 7.6, 1.2 Hz, 1 H), 6.74 (s, 1 H), 5.38 (d,  $J$  = 15.0 Hz, 1 H), 4.28 (d,  $J$  = 15.0 Hz, 1 H), 2.28 (s, 3 H);  $^{13}$ C NMR (125 Mz,  $d_6$ -DMSO, 120  $^{\circ}$ C)  $\delta$  168.6, 134.6, 132.6, 131.4, 131.3, 130.9, 129.3, 123.8, 123.0, 115.6, 47.4, 38.5, 20.7; IR (neat) 2926, 1667, 1661, 1499, 1395, 1233  $\text{cm}^{-1}$ ; mass spectrum (CI)  $m/z$  254.1044 [ $\text{C}_{13}\text{H}_{12}\text{N}_5\text{O}$  (M+1) requires 254.1042], 227.

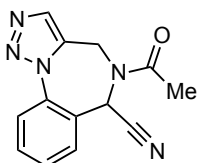

**45**{I}

**5-Acetyl-5,6-dihydro-4H-benzo[f][1,2,3]triazolo[1,5-a][1,4]diazepine-6-carbonitrile (45{I}).**

Propargylamine (53 mg, 61  $\mu$ L, 0.96 mmol) was added to a mixture of 2-azido-benzaldehyde **4** (118 mg, 0.802 mmol),<sup>4</sup> and activated, powdered 4  $\text{\AA}$  molecular sieves (400 mg, pre-activated weight) in anhydrous MeCN (2.0 mL) and the reaction stirred at room temperature for 18 h.  $\text{LiClO}_4$  (8.5 mg, 0.080 mmol) and trimethylsilyl cyanide (202 mg, 255  $\mu$ L, 2.04 mmol) were added, and the mixture was stirred at room temperature for 24 h. Pyridine (381 mg, 389  $\mu$ L, 4.81 mmol) and then acetyl chloride (**20**{I}) (252 mg, 228  $\mu$ L, 3.21  $\mu$ mol) were added and the reaction was stirred at room temperature for a further 36 h. The mixture was filtered through Celite<sup>®</sup>, and washed with MeCN (20 mL). The filtrate was concentrated under reduced pressure, and the residue purified by flash chromatography eluting with EtOAc to give 100 mg of amide **45**{I} (49%) as a cream colored solid. All spectroscopic data were consistent with those previously recorded.

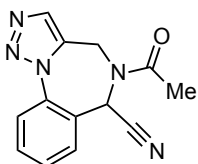

**45**{I}

**5-Acetyl-5,6-dihydro-4H-benzo[f][1,2,3]triazolo[1,5-a][1,4]diazepine-6-carbonitrile (45{I}).** Acetyl chloride (**20**{I}) (37 mg, 34  $\mu$ L, 0.47 mmol) was added to a solution of amine **44** (50 mg, 0.24 mmol)

and pyridine (56 mg, 57  $\mu$ L, 0.71 mmol) in anhydrous MeCN (1.25 mL) at 0 °C, and the reaction was stirred at room temperature for 3 h. The reaction was diluted with CH<sub>2</sub>Cl<sub>2</sub> (20 mL) and the mixture was washed with aqueous HCl (10 mL, 1.0 M) and saturated aqueous NaHCO<sub>3</sub> (10 mL). The organic layer was dried (MgSO<sub>4</sub>) and concentrated under reduced pressure, and the residue was purified by flash chromatography eluting with EtOAc/toluene (6 : 4  $\rightarrow$  7 : 3) to give 55 mg of amide **45{1}** (92 %) as a cream colored solid. All spectroscopic data were consistent with those previously recorded; LCMS purity 100%.

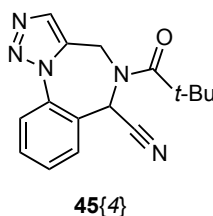

**5-Pivaloyl-5,6-dihydro-4H-benzo[f][1,2,3]triazolo[1,5-a][1,4]diazepine-6-carbonitrile**

**(45{4})**. Pivaloyl chloride (**20{4}**) (69 mg, 70  $\mu$ L, 0.57 mmol) was added to a solution of amine **44** (60 mg, 0.28 mmol) and pyridine (67 mg, 69  $\mu$ L, 0.85 mmol) in anhydrous MeCN (1.0 mL) at 0 °C, and the reaction was stirred at room temperature for 4 h. The mixture was diluted with CH<sub>2</sub>Cl<sub>2</sub> (20 mL) and washed with aqueous HCl (10 mL, 1.0 M) and saturated aqueous NaHCO<sub>3</sub> (10 mL). The organic layer was dried (MgSO<sub>4</sub>) and concentrated under reduced pressure, and the residue was purified by flash chromatography eluting with hexanes/EtOAc (1 : 1  $\rightarrow$  4 : 6) to give 77 mg (92%) of amide **45{4}** as a colorless solid: mp 212-214 °C (colorless needles from *i*-PrOH); <sup>1</sup>H NMR (400 MHz)  $\delta$  8.04 (dd, *J* = 7.8, 0.8 Hz, 1 H), 7.87 (s, 1 H), 7.75 (ddd, *J* = 7.8, 7.0, 2.0 Hz, 1 H), 7.62-7.55 (comp, 2 H), 6.42 (s, 1 H), 5.49 (d, *J* = 15.1 Hz, 1 H), 4.16 (d, *J* = 15.1 Hz, 1 H), 1.42 (s, 9 H); <sup>13</sup>C NMR (100 MHz)  $\delta$  176.4, 135.5, 132.9, 132.5, 131.6, 131.1, 130.4, 124.2, 123.9, 115.7, 48.8, 39.2, 39.0, 28.2; IR (neat) 2974, 2934, 2235, 1644, 1500, 1475, 1403, 1369, 1318, 1227, 1182, 1134, 1107 cm<sup>-1</sup>; mass spectrum (ESI) *m/z* 296.1508 [C<sub>16</sub>H<sub>18</sub>N<sub>5</sub>O (M+1) requires 296.1506]; LCMS purity 100%.

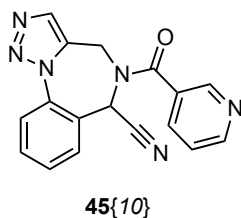

**5-nicotinoyl-5,6-dihydro-4H-benzo[f][1,2,3]triazolo[1,5-a][1,4]diazepine-6-carbonitrile (45{10})**. A mixture of amine **44** (110 mg, 0.52 mmol), nicotinoyl chloride hydrochloride (**20{10}**) (185 mg, 1.0

mmol) and pyridine (164 mg, 168  $\mu$ L, 2.1 mmol) in anhydrous  $\text{CH}_2\text{Cl}_2$  (3.0 mL) was stirred at room temperature for 2 h. Saturated aqueous  $\text{NaHCO}_3$  (5 mL) was added and the reaction was stirred at room temperature for 20 min. The reaction was then diluted with  $\text{CH}_2\text{Cl}_2$  (30 mL) and washed with saturated aqueous  $\text{NaHCO}_3$  (20 mL). The organic layer was dried ( $\text{MgSO}_4$ ) and concentrated under reduced pressure, and the residue was purified by flash chromatography eluting with dichloromethane/MeOH (24 : 1  $\rightarrow$  19 : 1) to give 153 mg (92%) of amide **45**{10} as a colorless solid: mp 187-189  $^\circ\text{C}$  (colorless microcrystals from *i*-PrOH);  $^1\text{H}$  NMR (400 MHz,  $\text{CDCl}_3$ ) (rotamers)  $\delta$  8.88-8.76, (comp, 2 H), 8.09 (d,  $J = 8.2$  Hz, 1 H), 7.95 (app dt,  $J = 7.9, 2.0$  Hz, 1 H), 7.90-7.74 (comp, 2 H), 7.70-7.46 (comp, 2 H), 7.51 (dd,  $J = 7.9, 5.0$  Hz, 1 H), 6.49 (br s, 1 H), 5.10 (br s, 1 H), 4.34 (br s, 1 H);  $^{13}\text{C}$  NMR (100 MHz,  $\text{CDCl}_3$ )  $\delta$  168.0, 152.7, 148.4, 135.9, 135.5, 133.8, 132.9, 131.5, 130.6, 130.2, 129.2, 124.7, 124.1, 123.3, 115.1, 47.7, 40.9; IR (neat) 2941, 2361, 1651, 1589, 1501, 1391, 1326, 1238, 1102  $\text{cm}^{-1}$ ; mass spectrum (CI)  $m/z$  317.1154 [ $\text{C}_{17}\text{H}_{13}\text{N}_6\text{O}$  (M+1) requires 317.1151]; LCMS purity 92%.

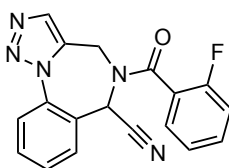

**45**{14}

**5-(2-Fluorobenzoyl)-5,6-dihydro-4H-benzo[f][1,2,3]triazolo[1,5-a][1,4]diazepine-6-carbonitrile (45**{14}). 2-Fluorobenzoyl chloride (**20**{14}) (90 mg, 68  $\mu$ L, 0.57 mmol) was added to a solution of amine **44** (60 mg, 0.28 mmol) and pyridine (67 mg, 69  $\mu$ L, 0.85 mmol) in anhydrous MeCN (1.5 mL) at 0  $^\circ\text{C}$ , and the reaction was stirred at room temperature for 1 h. The reaction was diluted with  $\text{CH}_2\text{Cl}_2$  (20 mL) and the mixture was washed with aqueous HCl (10 mL, 1.0 M) and saturated aqueous  $\text{NaHCO}_3$  (10 mL). The organic layer was dried ( $\text{MgSO}_4$ ) and concentrated under reduced pressure, and the residue was purified by flash chromatography eluting with hexanes/EtOAc (4 : 6) to give 93 mg (98%) of amide **45**{14} as a colorless solid: mp 217-219  $^\circ\text{C}$  (colorless prisms from hexanes/EtOAc);  $^1\text{H}$  NMR (500 MHz,  $\text{d}_6$ -DMSO, 100  $^\circ\text{C}$ )  $\delta$  8.01 (dd,  $J = 7.8, 1.2$  Hz, 1 H), 7.96 (s, 1 H), 7.93-7.80 (m, 1 H), 7.83 (app td,  $J = 7.8, 1.4$  Hz, 1 H), 7.67 (app td,  $J = 7.8, 1.2$  Hz, 1 H), 7.66-7.60 (m, 1 H), 7.54 (app, td,  $J = 7.4, 1.8$  Hz, 1 H), 7.41-7.32 (comp, 2 H), 6.90-6.52 (m, 1 H), 5.28-4.89 (m, 1 H), 4.33 (d,  $J = 15.3$  Hz, 1 H);  $^{13}\text{C}$  NMR (125 MHz,  $\text{d}_6$ -DMSO, 100  $^\circ\text{C}$ )  $\delta$  164.5, 157.6 ( $J_{\text{C-F}} = 347.6$  Hz), 134.7, 132.8, 132.3 ( $J_{\text{C-F}} = 8.3$  Hz), 131.8, 131.3, 131.0, 129.5, 128.6, 124.7 ( $J_{\text{C-F}} = 3.5$  Hz), 123.3, 123.3, 121.5 ( $J_{\text{C-F}} = 16.7$  Hz), 115.8 ( $J_{\text{C-F}} = 21.0$  Hz), 115.3, 47.1, 38.2; IR (neat) 3063, 2923, 1652, 1614, 1450, 1455, 1394,

1325, 1236, 1093  $\text{cm}^{-1}$ ; mass spectrum (ESI)  $m/z$  356.0918 [ $\text{C}_{18}\text{H}_{12}\text{N}_5\text{OFNa}$  ( $\text{M}+\text{Na}$ ) requires 356.0918]; LCMS purity 99%.

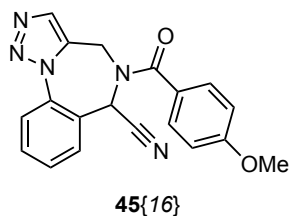

**5-(4-Methoxybenzoyl)-5,6-dihydro-4H-benzo[f][1,2,3]triazolo[1,5-a][1,4]diazepine-6-carbonitrile (45{16}).** 4-Methoxybenzoyl chloride (**20{16}**) (48 mg, 38  $\mu\text{L}$ , 0.28 mmol) was added to a solution of amine **44** (30 mg, 0.14 mmol) and pyridine (34 mg, 34  $\mu\text{L}$ , 0.43 mmol) in anhydrous MeCN (1.0 mL) at 0  $^{\circ}\text{C}$ , and the reaction was stirred at room temperature for 1 h. The reaction was diluted with  $\text{CH}_2\text{Cl}_2$  (20 mL) and the mixture was washed with aqueous HCl (20 mL, 1.0 M) and saturated aqueous  $\text{NaHCO}_3$  (20 mL). The organic layer was dried ( $\text{MgSO}_4$ ) and concentrated under reduced pressure, and the residue was purified by flash chromatography eluting with hexanes/EtOAc (1 : 1  $\rightarrow$  3 : 7) to give 49 mg (quant.) of amide **45{16}** as a colorless foam;  $^1\text{H}$  NMR (500 MHz,  $\text{d}_6$ -DMSO, 120  $^{\circ}\text{C}$ )  $\delta$  8.01 (dd,  $J = 7.7, 1.2$  Hz, 1 H), 7.94 (d,  $J = 0.9$  Hz, 1 H), 7.86 (dd,  $J = 7.7, 1.2$  Hz, 1 H), 7.82 (app td,  $J = 7.7, 1.2$  Hz, 1 H), 7.66 (app td,  $J = 7.7, 1.2$  Hz, 1 H), 7.56 (d,  $J = 8.9$  Hz, 2 H), 7.07 (d,  $J = 8.9$  Hz, 2 H), 6.57 (s, 1 H), 5.18 (d,  $J = 15.1$  Hz, 1 H), 4.44 (dd,  $J = 15.1, 0.9$  Hz, 1 H), 3.86 (s, 3 H);  $^{13}\text{C}$  NMR (125 MHz,  $\text{d}_6$ -DMSO, 120  $^{\circ}\text{C}$ )  $\delta$  169.0, 161.1, 134.6, 132.6, 131.4, 131.2, 131.2, 129.3, 129.1, 125.1, 123.7, 123.0, 115.6, 113.7, 54.9, 47.6, 39.1; IR (neat) 2939, 1644, 1607, 1512, 1501, 1383, 1252, 1238, 1176  $\text{cm}^{-1}$ ; mass spectrum (CI)  $m/z$  346.1306 [ $\text{C}_{19}\text{H}_{16}\text{N}_5\text{O}_2$  ( $\text{M}+1$ ) requires 346.1304]; LCMS purity 100%.

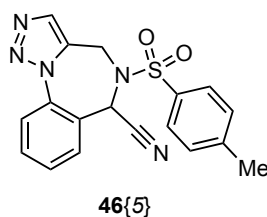

**5-Tosyl-5,6-dihydro-4H-benzo[f][1,2,3]triazolo[1,5-a][1,4]diazepine-6-carbonitrile (46{5}).** Tosyl chloride (**21{5}**) (54 mg, 0.28 mmol) was added to a solution of amine **44** (30 mg, 0.14 mmol) and pyridine (34 mg, 34  $\mu\text{L}$ , 1.4 mmol) in anhydrous MeCN (1.0 mL) and the reaction stirred at room temperature for 2 h. The mixture was diluted with  $\text{CH}_2\text{Cl}_2$  (20 mL) and washed with aqueous HCl (20 mL, 1.0 M) and saturated aqueous  $\text{NaHCO}_3$  (20 mL). The organic layer was dried ( $\text{MgSO}_4$ ) and concentrated under reduced pressure, and the residue was purified by flash chromatography eluting with

hexanes/EtOAc (1 : 1 → 4 : 6) to give 45 mg of sulfonamide **46{5}** (87 %) as a colorless glass: mp 127-128.5 °C (colorless microcrystals from *i*-PrOH); <sup>1</sup>H NMR (400 MHz) δ 7.93 (d, *J* = 7.6 Hz, 1 H), 7.80 (d, *J* = 8.0 Hz, 2 H), 7.72 (s, 1 H), 7.66 (app t, *J* = 7.6 Hz, 1 H), 7.50 (app t, *J* = 7.6 Hz, 1 H), 7.46 (d, *J* = 7.6 Hz, 1 H), 7.34 (d, *J* = 8.0 Hz, 2 H), 6.13 (s, 1 H), 5.04 (d, *J* = 14.4 Hz, 1 H), 3.99 (d, *J* = 14.4 Hz, 1 H), 2.40 (s, 3 H); <sup>13</sup>C NMR (100 MHz) δ 145.5, 135.0, 134.0, 133.6, 132.6, 130.8, 130.4, 130.3, 129.9, 127.5, 124.4, 123.2, 114.8, 49.6, 38.0, 21.7; IR (neat) 2954, 2925, 2252, 1597 1499, 1361, 1166, 1094, 1010 cm<sup>-1</sup>; mass spectrum (CI) *m/z* 366.1028 [C<sub>18</sub>H<sub>16</sub>N<sub>5</sub>O<sub>2</sub>S (M+1) requires 366.1025], 339, 210, 182, 85, 83; LCMS purity 100%.

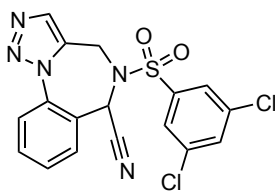

**46{11}**

**5-(3,5-Dichlorophenylsulfonyl)-5,6-dihydro-4H-benzo[f][1,2,3]triazolo[1,5-a][1,4]diazepine-6-carbonitrile (46{11}).** 3,5-Dichlorobenzenesulfonyl chloride (**21{11}**) (232 mg, 0.947 mmol) was added to a solution of amine **44** (100 mg, 0.473 mmol) and pyridine (115 μL, 1.42 mmol) in anhydrous MeCN (2.5 mL), and the reaction was stirred at room temperature for 18 h. The mixture was diluted with CH<sub>2</sub>Cl<sub>2</sub> (15 mL) and washed with aqueous HCl (10 mL, 1.0 M) and saturated aqueous NaHCO<sub>3</sub> (10 mL). The organic layer was dried (MgSO<sub>4</sub>) and concentrated under reduced pressure, and the residue was purified by flash chromatography eluting with hexanes/EtOAc (1 : 1) to give 160 mg (80%) of sulfonamide **46{11}** as a colorless solid: mp 175-176 °C (colorless microcrystals from *i*-PrOH); <sup>1</sup>H NMR (400 MHz) δ 8.01 (d, *J* = 7.8 Hz, 1 H), 7.84-7.70 (comp, 4 H), 7.66-7.56 (comp, 2 H), 7.53 (d, *J* = 7.4 Hz, 1 H), 6.07 (s, 1 H), 5.04 (d, *J* = 14.7 Hz, 1 H), 4.11 (d, *J* = 14.7 Hz, 1 H); <sup>13</sup>C NMR (400 MHz) δ 140.1, 136.9, 135.1, 134.3, 133.7, 133.0, 130.8, 130.7, 129.4, 125.8, 124.9, 122.9, 114.0, 49.8, 38.5; IR (neat) 3079, 2955, 1570, 1500, 1422, 1369, 1174, 1143, 1100, 1021; mass spectrum (CI) *m/z* 420.0091 [C<sub>17</sub>H<sub>12</sub>N<sub>5</sub>O<sub>2</sub>SCl<sub>2</sub> (M+1) requires 420.0089], 422, 395, 393, 210; LCMS purity 97%.

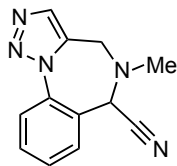

**47{1}**

**5-Methyl-5,6-dihydro-4H-benzo[f][1,2,3]triazolo[1,5-a][1,4]diazepine-6-carbonitrile**

**(47{1})**. A mixture of sodium triacetoxyborohydride (271 mg, 1.28 mmol), amine **44** (45 mg, 0.21 mmol), paraformaldehyde (**25{1}**) (64 mg, 2.1 mmol) and glacial acetic acid (13 mg, 12  $\mu$ L, 0.21 mmol) in DCE (3.4 mL) was stirred at room temperature for 36 h. The reaction was diluted with  $\text{CH}_2\text{Cl}_2$  (15 mL) and saturated aqueous  $\text{NaHCO}_3$  (15 mL), and the layers were separated. The aqueous layer was extracted with  $\text{CH}_2\text{Cl}_2$  ( $2 \times 10$  mL), and the combined organic layers were dried ( $\text{MgSO}_4$ ) and concentrated under reduced pressure. The residue was purified by flash chromatography eluting with toluene/EtOAc (7 : 3  $\rightarrow$  1 : 1) to give 30 mg (63%) of amine **47{1}** as a colorless solid: mp 161-163  $^\circ\text{C}$  (colorless needles from *i*-PrOH);  $^1\text{H}$  NMR (400 MHz)  $\delta$  7.97 (d,  $J = 7.9$  Hz, 1 H), 7.82 (s, 1 H), 7.78 (d,  $J = 7.5$  Hz, 1 H), 7.70 (dd,  $J = 7.9, 7.5$  Hz, 1 H), 7.61 (app t,  $J = 7.5$ , 1 H), 4.42 (s, 1 H), 3.86 (d,  $J = 14.5$  Hz, 1 H), 3.68 (d,  $J = 14.5$  Hz, 1 H), 3.11 (s, 3 H);  $^{13}\text{C}$  NMR (75 MHz)  $\delta$  135.5, 133.3, 132.0, 131.5, 130.0, 129.8, 124.4, 123.8, 116.1, 57.1, 45.9, 42.5; IR (neat) 2951, 2856, 2801, 1496, 1469, 1228, 1184, 1135, 1099, 1034  $\text{cm}^{-1}$ ; mass spectrum (CI)  $m/z$  226.1093 [ $\text{C}_{12}\text{H}_{12}\text{N}_5$  (M+1) requires 226.1093], 199; LCMS purity 98%.

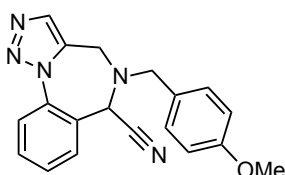

**47{14}**

**5-(4-Methoxybenzyl)-5,6-dihydro-4H-benzo[f][1,2,3]triazolo[1,5-a][1,4]diazepine-6-**

**carbonitrile (47{14})**. Sodium triacetoxyborohydride (2.16 g, 10.2 mmol) was added to a solution of amine **44** (360 mg, 1.70 mmol), *p*-anisaldehyde (**25{14}**) (1.39 g, 1.24 mL, 10.2 mmol) and glacial acetic acid (102 mg, 97  $\mu$ L, 1.70 mmol) in DCE (27 mL) and the reaction stirred at room temperature for 18 h. The reaction was diluted with  $\text{CH}_2\text{Cl}_2$  (30 mL) and saturated aqueous  $\text{NaHCO}_3$  (30 mL) and the layers separated. The aqueous layer was extracted with  $\text{CH}_2\text{Cl}_2$  ( $2 \times 30$  mL) and the combined organic layers dried ( $\text{MgSO}_4$ ) and concentrated under reduced pressure. The residue was purified by flash chromatography eluting with hexanes/EtOAc (9 : 1  $\rightarrow$  7 : 3) to give 418 mg of amine **47{14}**



(74%) as a colorless solid: mp 155 °C (dec.) (colorless microcrystals from *i*-PrOH); <sup>1</sup>H NMR (500 MHz) δ 8.00 (dd, *J* = 7.6, 1.1 Hz, 1 H), 7.77 (s, 1 H), 7.68 (app td, *J* = 7.6, 1.6 Hz, 1 H), 7.60 (dd, *J* = 7.6, 1.6 Hz, 1 H), 7.56 (app td, *J* = 7.6, 1.1 Hz, 1 H), 7.33 (d, *J* = 8.7 Hz, 2 H), 6.93 (d, *J* = 8.7 Hz, 2 H), 4.65 (s, 1 H), 3.88 (d, *J* = 12.9 Hz, 1 H), 3.85-3.78 (comp, 5 H), 3.72 (d, *J* = 14.9 Hz, 1 H); <sup>13</sup>C NMR (125 MHz) δ 159.6, 135.6, 133.1, 132.3, 131.5, 130.3, 130.3, 129.7, 128.0, 124.5, 123.8, 116.2, 114.3, 58.1, 55.4, 55.3, 42.7; IR (neat) 2933, 2835, 2247, 1611, 1512, 1495, 1468, 1249, 1175, 1032 cm<sup>-1</sup>; mass spectrum (CI) *m/z* 332.1510 [C<sub>19</sub>H<sub>18</sub>N<sub>5</sub>O (M+1) requires 332.1511], 305, 121. LCMS purity 99%.

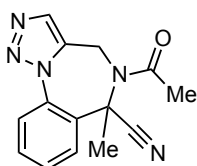

**48{1,1}**

**5-Acetyl-6-methyl-5,6-dihydro-4H-benzof[1,2,3]triazolo[1,5-a][1,4]diazepine-6-carbonitrile (48{1,1}).** A solution of amide **45{1}** (70 mg, 0.28 mmol) in DMF (3.5 mL) was added dropwise over 3 min to sodium hydride (12 mg, 0.30 mmol), and the mixture was stirred at room temperature for 45 min. Methyl iodide (**50{1}**) (196 mg, 86 μL, 1.38 mmol) was added and the reaction was stirred at room temperature for 1 h. The reaction was diluted with toluene (30 mL) and washed with H<sub>2</sub>O (3 × 10 mL). The combined aqueous washes were extracted with toluene (3 × 5 mL), and then the combined organic layers were washed with saturated aqueous NaHCO<sub>3</sub> (10 mL). The organic layer was dried (MgSO<sub>4</sub>) and concentrated under reduced pressure, and the residue was purified by flash chromatography eluting with EtOAc to give 59 mg (80%) of nitrile **48{1,1}** as a colorless solid: mp 175-177 °C; <sup>1</sup>H NMR (400 MHz) δ 8.29 (dd, *J* = 7.8, 1.6 Hz, 1 H), 8.03 (dd, *J* = 7.8, 1.6 Hz, 1 H), 7.83 (s, 1 H), 7.71 (app td, *J* = 7.8, 1.6 Hz, 1 H), 7.65 (app td, *J* = 7.8, 1.6 Hz, 1 H), 5.05 (d, *J* = 16.6 Hz, 1 H), 4.40 (d, *J* = 16.6 Hz, 1 H), 2.36 (s, 3 H), 1.58 (s, 3 H); <sup>13</sup>C NMR (100 MHz) δ 168.8, 133.6, 132.7, 131.6, 130.8, 130.3, 129.3, 128.6, 125.7, 117.5, 60.1, 39.7, 26.4, 23.9; IR (neat) 3137, 3003, 2935, 2246, 1668, 1495, 1392, 1353, 1227, 1187, 1127, 1052 cm<sup>-1</sup>; mass spectrum (ESI) *m/z* 268.1192 [C<sub>14</sub>H<sub>14</sub>N<sub>5</sub>O (M+1) requires 268.1193]; LCMS purity 100%.

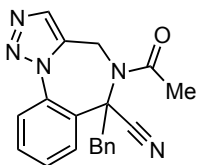

**48{1,2}**

**5-Acetyl-6-benzyl-5,6-dihydro-4H-benzo[f][1,2,3]triazolo[1,5-a][1,4]diazepine-6-carbonitrile (48{1,2}).** A solution of amide **45{1}** (50 mg, 0.20 mmol) in DMF (2.8 mL) was added dropwise over 2 min to sodium hydride (8.7 mg, 0.22 mmol), and the mixture was stirred at room temperature for 45 min. Benzyl bromide (**50{2}**) (101 mg, 70  $\mu$ L, 0.59 mmol) was added, and the reaction was stirred at room temperature for 15 min. The reaction was diluted with toluene (30 mL) and washed with H<sub>2</sub>O (3  $\times$  10 mL). The combined aqueous washes were extracted with toluene (3  $\times$  5 mL) and then the combined organic layers were washed with saturated aqueous NaHCO<sub>3</sub> (10 mL). The organic layer was dried (MgSO<sub>4</sub>) and concentrated under reduced pressure, and the residue was purified by flash chromatography eluting with EtOAc to give 58 mg (86%) of nitrile **48{1,2}** as a colorless solid: mp 242-244  $^{\circ}$ C; <sup>1</sup>H NMR (400 MHz)  $\delta$  8.00 (dd,  $J$  = 7.8, 1.2 Hz, 1 H), 7.86 (s, 1 H), 7.79 (dd,  $J$  = 7.8, 1.2 Hz, 1 H), 7.63 (app td,  $J$  = 7.8, 1.2 Hz 1 H), 7.34 (app td,  $J$  = 7.8, 1.2 Hz, 1 H), 7.10 (t,  $J$  = 7.2 Hz, 1 H), 7.04 (app t,  $J$  = 7.2, Hz, 2 H), 6.74 (d,  $J$  = 7.2, 2 H), 5.09 (br d,  $J$  = 16.4 Hz, 1 H), 4.32 (d,  $J$  = 16.4 Hz, 1 H), 3.97 (br d,  $J$  = 13.2 Hz, 1 H), 2.46 (s, 3 H), 2.09 (d,  $J$  = 13.2 Hz, 1 H); <sup>13</sup>C NMR (100 MHz)  $\delta$  168.7, 134.0, 132.6, 132.5, 131.7, 131.5, 130.9, 130.1, 129.7, 128.1, 127.7, 125.5, 125.5, 116.3, 66.6, 42.2, 39.8, 24.3; IR (neat) 3031, 2926, 2854, 1666, 1496, 1392, 1353, 1229, 1218, 1133, 1043 cm<sup>-1</sup>; mass spectrum (ESI)  $m/z$  344.1506 [C<sub>20</sub>H<sub>18</sub>N<sub>5</sub>O (M+1) requires 344.1506]; LCMS purity 100%.

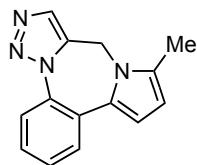

**49{1}**

**11-Methyl-9H-benzo[f]pyrrolo[1,2-d][1,2,3]triazolo[1,5-a][1,4]diazepine (49{1}).** A solution of amide **45{1}** (55 mg, 0.22 mmol) in degassed DMF (2.5 mL) was added dropwise over 2 min to sodium hydride (9.6 mg, 0.24 mmol), and the mixture was stirred at room temperature for 45 min. A solution of triphenylvinylphosphonium bromide (**51**) (92 mg, 0.25 mmol) in degassed DMF (1.5 mL) was added, and the reaction was stirred at room temperature for 1.5 h. The reaction was diluted with toluene (30 mL) and washed with H<sub>2</sub>O (3  $\times$  15 mL) and saturated aqueous NaHCO<sub>3</sub> (10 mL). The

organic layer was dried (MgSO<sub>4</sub>) and concentrated under reduced pressure, and the residue was purified by flash chromatography eluting with hexanes/EtOAc (1 : 1) to give 37 mg (72%) of pyrrole **49**{1} as a colorless solid: mp 194-196 °C (colorless needles from *i*-PrOH); <sup>1</sup>H NMR (500 MHz) δ 8.04 (dd, *J* = 7.4, 1.6 Hz, 1 H), 7.70 (s, 1 H), 7.66 (dd, *J* = 7.4, 1.7 Hz, 1 H), 7.46 (app td, *J* = 7.4, 1.6 Hz, 1 H), 7.43 (app td, *J* = 7.4, 1.7 Hz, 1 H), 6.38 (d, *J* = 3.6 Hz, 1 H), 6.01 (d, *J* = 3.6 Hz, 1 H), 5.03 (s, 2 H), 2.37 (s, 3 H); <sup>13</sup>C NMR (125 MHz) δ 134.0, 131.7, 131.0, 129.8, 129.7, 129.4, 129.2, 127.7, 125.1, 123.8, 109.3, 108.6, 36.5, 12.3; IR (neat) 3098, 3002, 2917, 2854, 1607, 1507, 1481, 1444, 1406, 1406, 1345, 1329, 1250, 1228, 1192, 1130, 1043, 1031 cm<sup>-1</sup>; mass spectrum (ESI) *m/z* 237.1135 [C<sub>14</sub>H<sub>13</sub>N<sub>4</sub> (M+1) requires 237.1135]; LCMS purity 100%.

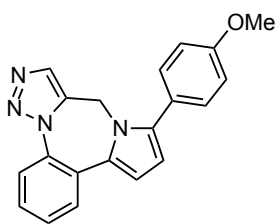

**49**{16}

**11-(4-Methoxyphenyl)-9H-benzo[f]pyrrolo[1,2-d][1,2,3]triazolo[1,5-a][1,4]diazepine (29).** A solution of amide **45**{16} (64 mg, 0.19 mmol) in degassed DMF (2.3 mL) was added dropwise over 2 min to sodium hydride (8.2 mg, 0.20 mmol), and the mixture was stirred at room temperature for 45 min. A solution of triphenylvinylphosphonium bromide (**51**) (79 mg, 0.21 mmol) in degassed DMF (1.4 mL) was added, and the reaction was stirred at room temperature for 1.5 h. The reaction was diluted with toluene (30 mL) and washed with H<sub>2</sub>O (3 × 10 mL) and saturated aqueous NaHCO<sub>3</sub> (10 mL). The organic layer was dried (MgSO<sub>4</sub>) and concentrated under reduced pressure, and the residue was purified by flash chromatography eluting with hexanes/EtOAc (6 : 4) to give 52 mg (85%) of pyrrole **45**{16} as a colorless solid: mp 186-187 °C; <sup>1</sup>H NMR (400 MHz) δ 8.08 (dd, *J* = 7.5, 1.6 Hz, 1 H), 7.75 (dd, *J* = 7.5, 1.6 Hz, 1 H), 7.70 (s, 1 H), 7.50 (app td, *J* = 7.5, 1.6 Hz, 1 H), 7.46 (app td, *J* = 7.5, 1.6 Hz, 1 H), 7.31 (d, *J* = 6.7 Hz, 2 H), 7.03 (d, *J* = 6.7 Hz, 2 H), 6.54 (d, *J* = 3.7 Hz, 1 H), 6.26 (d, *J* = 3.7 Hz, 1 H), 5.09 (br s, 2 H), 3.87 (s, 3 H); <sup>13</sup>C NMR (100 MHz) δ 159.5, 135.8, 134.7, 131.9, 131.2, 130.8, 130.6, 129.6, 129.4, 128.1, 124.9, 124.5, 124.0, 114.4, 110.1, 109.9, 55.5, 37.3; IR (neat) 3003, 2932, 2837, 1610, 1550, 1487, 1454, 1395, 1334, 1289, 1250, 1177, 1131, 1032 cm<sup>-1</sup>; mass spectrum (CI) *m/z* 329.1400 [C<sub>20</sub>H<sub>17</sub>N<sub>4</sub>O (M+1) requires 329.1402], 330, 328; LCMS purity 100%.

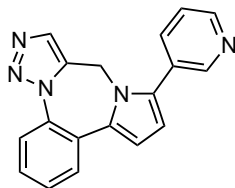

49{10}

**11-(pyridin-3-yl)-9H-benzo[f]pyrrolo[1,2-d][1,2,3]triazolo[1,5-a][1,4]diazepine (49{10})**. A solution of amide **45{10}** (78 mg, 0.25 mmol) in DMF (2.8 mL) was added dropwise over 2 min to sodium hydride (10.8 mg, 0.27 mmol), and the mixture was stirred at room temperature for 45 min. A solution of triphenylvinylphosphonium bromide (**51**) (105 mg, 0.28 mmol) in DMF (1.8 mL) was added, and the reaction was stirred at room temperature for 1.5 h. The reaction was diluted with toluene (30 mL) and washed with H<sub>2</sub>O (3 × 15 mL) and saturated aqueous NaHCO<sub>3</sub> (10 mL). The organic layer was dried (MgSO<sub>4</sub>) and concentrated under reduced pressure, and the residue was purified by flash chromatography eluting with toluene/EtOAc/MeOH (50 : 50 : 1) to give 67 mg (91%) of pyrrole **49{10}** as a pale yellow solid: mp 182-184 °C (pale yellow needles from hexanes/EtOAc); <sup>1</sup>H NMR (400 MHz) δ 8.72-8.67 (m, 1 H), 8.67-8.62 (m, 1 H), 8.13-8.06 (m, 1 H), 7.79-7.74 (comp, 2 H), 7.72 (app dt, *J* = 7.8, 2.0 Hz, 1 H), 7.56-7.48 (comp, 2 H), 7.45 (dd, *J* = 7.8, 4.9 Hz, 1 H), 6.60 (d, *J* = 3.9 Hz, 1 H), 6.39 (d, *J* = 3.9 Hz, 1 H), 5.12 (br s, 2 H); <sup>13</sup>C NMR (100 MHz) δ 149.7, 148.9, 136.2, 134.2, 132.7, 132.0, 131.9, 130.9, 129.7, 129.5, 128.6, 128.1, 124.4, 124.0, 123.8, 111.5, 110.7, 37.5; IR (neat) 3031, 2924, 2854, 1567, 1482, 1454, 1421, 1335, 1253, 1231 cm<sup>-1</sup>; mass spectrum (ESI) *m/z* 300.1245 [C<sub>18</sub>H<sub>14</sub>N<sub>5</sub> (M+1) requires 300.1244]; LCMS purity 100%.

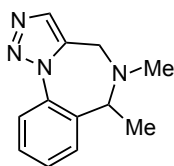

52{1,1}

**5,6-Dimethyl-5,6-dihydro-4H-benzo[f][1,2,3]triazolo[1,5-a][1,4]diazepine (52{1,1})**.

Methylmagnesium bromide solution (**54{1}**) (298 μL, 0.954 mmol, 3.2 M in Et<sub>2</sub>O) was added to a solution of zinc chloride (1.34 mL, 1.34 mmol, 1.0 M in THF) and the mixture was stirred at 0 °C for 10 min. The reaction was diluted with THF (2.0 mL), a solution of nitrile **47{1}** (43 mg, 0.19 mmol) in THF (1.5 mL) was added, and the mixture was stirred at room temperature for 6 h. The reaction was diluted with saturated aqueous NaHCO<sub>3</sub> (20 mL) and H<sub>2</sub>O (10 mL) and the mixture was extracted with CH<sub>2</sub>Cl<sub>2</sub> (3 × 10 mL). The combined organic extracts were dried (MgSO<sub>4</sub>) and concentrated under

reduced pressure, and the residue was purified by flash chromatography eluting with EtOAc/MeOH (19 : 1) to give 30 mg (73%) of amine **52**{1,1} as a colorless oil; <sup>1</sup>H NMR (400 MHz) δ 7.90 (d, *J* = 7.2 Hz, 1 H), 7.75 (s, 1 H), 7.58-7.44 (comp, 3 H), 3.77 (d, *J* = 14.0 Hz, 1 H), 3.56 (d, *J* = 14.0 Hz, 1 H), 3.53 (q, *J* = 6.8 Hz, 1 H), 2.41 (s, 3 H), 1.31 (d, *J* = 6.8 Hz, 3 H); <sup>13</sup>C NMR (100 MHz) δ 136.0, 133.6, 132.6, 132.3, 129.1, 129.0, 128.9, 123.2, 58.5, 47.4, 41.1, 18.3; IR (neat) 2981, 2940, 2850, 2784, 1491, 1468, 1376, 1226, 1139, 1097, 1039 cm<sup>-1</sup>; mass spectrum (ESI) *m/z* 215.1291 [C<sub>12</sub>H<sub>15</sub>N<sub>4</sub> (M+1) requires 215.1291]; LCMS purity 92%.

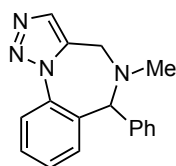

**52**{1,2}

**5-Methyl-6-phenyl-5,6-dihydro-4*H*-benzo[*f*][1,2,3]triazolo[1,5-*a*][1,4]diazepine** (**52**{1,2}).

Phenylmagnesium bromide solution (**54**{2}) (164 μL, 0.444 mmol, 2.7 M in Et<sub>2</sub>O) was added to a solution of zinc chloride (667 μL, 0.667 mmol, 1.0 M in THF) at 0 °C, and the mixture stirred for 10 min. The reaction was diluted with THF (2.0 mL), a solution of nitrile **47**{1} (50 mg, 0.22 mmol) in THF (1.5 mL) was added and the mixture was stirred at 0 °C for 5 min, and then room temperature for 1.5 h. The reaction was diluted with saturated aqueous NaHCO<sub>3</sub> (10 mL) and H<sub>2</sub>O (10 mL). The mixture was extracted with CH<sub>2</sub>Cl<sub>2</sub> (3 × 10 mL), and the combined organic extracts were dried (MgSO<sub>4</sub>), concentrated under reduced pressure, and the residue was purified by flash chromatography eluting with hexanes/EtOAc (6 : 4) to give 53 mg (86%) of amine **52**{1,2} as a colorless solid: mp 111-113 °C; <sup>1</sup>H NMR (400 MHz) δ 7.86 (dd, *J* = 7.8, 1.3 Hz, 1 H), 7.74 (s, 1 H), 7.49 (app td, *J* = 7.8, 1.4 Hz, 1 H), 7.36-7.25 (comp, 6 H), 6.89 (d, *J* = 8.0 Hz, 1 H), 4.16 (s, 1 H), 3.97 (d, *J* = 14.9 Hz, 1 H), 3.76 (d, *J* = 14.9 Hz, 1 H), 2.36 (s, 3 H); <sup>13</sup>C NMR (100 MHz) δ 139.9, 136.3, 133.5, 132.8, 132.8, 131.3, 129.2, 128.9, 128.6, 128.5, 127.9, 123.1, 69.3, 46.8, 43.4; IR (neat) 3061, 3029, 2950, 2848, 2785, 1604, 1488, 1468, 1452, 1325, 1226, 1137, 1097, 1076, 1026 cm<sup>-1</sup>; mass spectrum (ESI) *m/z* 277.1447 [C<sub>17</sub>H<sub>17</sub>N<sub>4</sub> (M+1) requires 227.1448], 278; LCMS purity 99%.

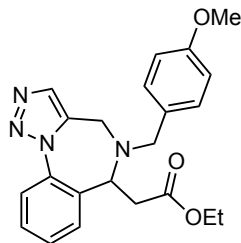

**53{14}**

**Ethyl 2-(5-(4-methoxybenzyl)-5,6-dihydro-4H-benzo[f][1,2,3]triazolo[1,5- a][1,4]diazepin-6-yl)acetate (53{14}).** Glacial acetic acid (0.6 mg, 0.6  $\mu$ L, 0.1 mmol), was added to a mixture of nitrile **47{14}** (35 mg, 0.11 mmol), ethyl bromoacetate (**55**) (88 mg, 59  $\mu$ L, 0.53 mmol) and activated zinc granules (35 mg, 0.53 mmol) in THF (1.0 mL) and the reaction was stirred at 45  $^{\circ}$ C for 2 h. The cooled mixture was diluted with saturated aqueous NaHCO<sub>3</sub> (10 mL) and H<sub>2</sub>O (10 mL) and extracted with CH<sub>2</sub>Cl<sub>2</sub> (3  $\times$  15 mL). The combined organic extracts were dried (MgSO<sub>4</sub>) and concentrated under reduced pressure, and the residue was purified by flash chromatography eluting with hexanes/EtOAc (6 : 4) to give 31 mg (75%) of ester **53{14}** as a colorless oil; <sup>1</sup>H NMR (400 MHz)  $\delta$  7.97 (d, *J* = 7.9 Hz, 1 H), 7.67 (s, 1 H), 7.55 (ddd, *J* = 7.9, 7.5, 1.0 Hz, 1 H), 7.46 (app t, *J* = 7.5 Hz, 1 H), 7.40 (dd, *J* = 7.5, 1.0 Hz, 1 H), 7.22 (d, *J* = 8.5 Hz, 2 H), 6.87 (d, *J* = 8.5 Hz, 2 H), 4.43 (dd, *J* = 8.9, 6.5 Hz, 1 H), 4.08-3.98 (m, 2 H), 3.90 (d, *J* = 13.3 Hz, 1 H), 3.84 (d, *J* = 12.7 Hz, 1 H), 3.81 (s, 3 H), 3.69 (d, *J* = 12.7 Hz, 1 H), 3.21 (d, *J* = 13.3 Hz, 1 H), 2.11 (dd, *J* = 15.4, 8.9 Hz, 1 H), 2.02 (dd, *J* = 15.4, 6.5 Hz, 1 H), 1.14 (t, *J* = 7.0 Hz, 3 H); <sup>13</sup>C NMR (100 MHz)  $\delta$  171.1, 159.2, 135.4, 134.2, 132.9, 131.4, 130.5, 130.2, 130.0, 129.7, 129.2, 123.6, 114.0, 63.5, 61.1, 60.6, 55.4, 43.7, 40.9, 14.2; IR (neat) 2981, 2935, 2836, 1731, 1612, 1512, 1496, 1447, 1371, 1303, 1248, 1178, 1135, 1099, 1034 cm<sup>-1</sup>; mass spectrum (ESI) *m/z* 393.1920 [C<sub>22</sub>H<sub>25</sub>N<sub>4</sub>O<sub>3</sub> (M+1) requires 393.1921]; LCMS purity 97%.

### Lipinski Data

| Compound #    | Molecular Weight | ClogP <sup>a</sup> | H-bond donors | H-bond acceptors | Lipinski Rule of 5 |
|---------------|------------------|--------------------|---------------|------------------|--------------------|
| <b>6</b>      | 186.21           | 0.91               | 1             | 3                | Satisfied          |
| <b>7</b>      | 265.11           | 1.68               | 1             | 3                | Satisfied          |
| <b>8{2}</b>   | 258.28           | 0.34               | 0             | 4                | Satisfied          |
| <b>8{8}</b>   | 359.21           | 3.58               | 0             | 3                | Satisfied          |
| <b>8{10}</b>  | 291.31           | 1.15               | 0             | 4                | Satisfied          |
| <b>9{9}</b>   | 427.34           | 3.89               | 0             | 3                | Satisfied          |
| <b>9{12}</b>  | 427.34           | 3.89               | 0             | 3                | Satisfied          |
| <b>10{4}</b>  | 376.43           | 3.12               | 0             | 4                | Satisfied          |
| <b>10{9}</b>  | 383.42           | 1.36               | 1             | 5                | Satisfied          |
| <b>10{10}</b> | 368.45           | 3.67               | 0             | 4                | Satisfied          |

|          |        |      |   |   |               |
|----------|--------|------|---|---|---------------|
| 11{1}    | 343.20 | 0.78 | 0 | 4 | Satisfied     |
| 11{6}    | 439.71 | 3.50 | 0 | 4 | Satisfied     |
| 12{2}    | 315.33 | 0.39 | 1 | 4 | Satisfied     |
| 12{4}    | 305.33 | 2.43 | 1 | 3 | Satisfied     |
| 12{8}    | 323.32 | 2.57 | 1 | 3 | Satisfied     |
| 13{3}    | 390.28 | 2.98 | 1 | 3 | Satisfied     |
| 13{4}    | 384.23 | 3.19 | 1 | 3 | Satisfied     |
| 14{1}    | 285.37 | 2.03 | 1 | 2 | Satisfied     |
| 14{4}    | 301.41 | 2.35 | 1 | 2 | Satisfied     |
| 14{7}    | 346.41 | 3.17 | 1 | 3 | Satisfied     |
| 15{3}    | 428.35 | 4.08 | 1 | 2 | Satisfied     |
| 15{7}    | 425.31 | 3.94 | 1 | 3 | Satisfied     |
| 16{1}    | 244.25 | 1.14 | 0 | 3 | Satisfied     |
| 16{2}    | 270.29 | 1.87 | 0 | 3 | Satisfied     |
| 16{3}    | 286.33 | 2.38 | 0 | 3 | Satisfied     |
| 17{1}    | 200.24 | 1.29 | 0 | 3 | Satisfied     |
| 17{8}    | 352.43 | 4.66 | 0 | 3 | Satisfied     |
| 17{10}   | 277.32 | 1.88 | 0 | 4 | Satisfied     |
| 18{5}    | 424.12 | 4.99 | 0 | 3 | Satisfied     |
| 18{12}   | 361.28 | 4.17 | 0 | 3 | Satisfied     |
| 19{1}    | 296.75 | 3.79 | 0 | 3 | Satisfied     |
| 19{3}    | 280.30 | 3.32 | 0 | 3 | Satisfied     |
| 19{6}    | 263.30 | 2.56 | 0 | 4 | Satisfied     |
| 27{1}    | 269.35 | 1.87 | 1 | 4 | Satisfied     |
| 27{2}    | 271.32 | 0.80 | 1 | 5 | Satisfied     |
| 30{1}    | 262.31 | 2.55 | 1 | 3 | Satisfied     |
| 30{2}    | 280.30 | 2.70 | 1 | 3 | Satisfied     |
| 30{5}    | 292.34 | 2.40 | 1 | 4 | Satisfied     |
| 31{1,4}  | 353.46 | 3.28 | 0 | 4 | Satisfied     |
| 31{2,13} | 403.48 | 2.69 | 0 | 5 | Satisfied     |
| 32{1,13} | 394.47 | 4.44 | 0 | 3 | Satisfied     |
| 32{2,4}  | 364.42 | 4.11 | 0 | 3 | Satisfied     |
| 33{1,5}  | 423.53 | 3.60 | 0 | 5 | Satisfied     |
| 33{2,11} | 480.37 | 3.22 | 0 | 6 | Satisfied     |
| 34{2,5}  | 434.49 | 4.43 | 0 | 4 | Satisfied     |
| 34{5,11} | 501.39 | 4.82 | 0 | 5 | One violation |
| 35{1,3}  | 394.51 | 3.17 | 1 | 4 | Satisfied     |
| 35{2,2}  | 400.43 | 0.28 | 1 | 6 | Satisfied     |
| 36{1,2}  | 391.42 | 2.04 | 1 | 4 | Satisfied     |
| 36{5,3}  | 417.50 | 3.70 | 1 | 4 | Satisfied     |
| 37{1,3}  | 432.58 | 4.27 | 1 | 3 | Satisfied     |
| 37{2,3}  | 434.56 | 3.20 | 1 | 4 | Satisfied     |
| 38{1,3}  | 425.55 | 4.96 | 1 | 2 | Satisfied     |
| 38{2,3}  | 443.54 | 5.10 | 1 | 2 | Satisfied     |
| 39{1,2}  | 325.45 | 3.49 | 0 | 4 | Satisfied     |
| 39{2,14} | 391.47 | 2.75 | 0 | 6 | Satisfied     |

|          |        |      |   |   |               |
|----------|--------|------|---|---|---------------|
| 40{2,2}  | 336.41 | 4.33 | 0 | 3 | Satisfied     |
| 40{5,14} | 412.48 | 4.35 | 0 | 5 | Satisfied     |
| 41{1,1}  | 379.89 | 4.74 | 0 | 4 | Satisfied     |
| 41{2,1}  | 381.86 | 3.68 | 0 | 5 | Satisfied     |
| 42{2,1}  | 390.84 | 5.58 | 0 | 3 | One violation |
| 42{5,1}  | 402.88 | 5.28 | 0 | 4 | One violation |
| 45{7}    | 329.36 | 2.63 | 0 | 4 | Satisfied     |
| 45{15}   | 340.34 | 1.98 | 0 | 5 | Satisfied     |
| 46{3}    | 351.38 | 1.88 | 0 | 5 | Satisfied     |
| 46{7}    | 381.41 | 1.72 | 0 | 6 | Satisfied     |
| 47{1}    | 225.25 | 1.04 | 0 | 4 | Satisfied     |
| 47{5}    | 370.24 | 3.97 | 0 | 4 | Satisfied     |
| 48{1,1}  | 267.29 | 0.70 | 0 | 4 | Satisfied     |
| 48{1,2}  | 343.38 | 2.35 | 0 | 4 | Satisfied     |
| 48{15,1} | 354.37 | 2.41 | 0 | 5 | Satisfied     |
| 48{15,2} | 430.46 | 4.06 | 0 | 5 | Satisfied     |
| 49{1}    | 236.27 | 2.42 | 0 | 2 | Satisfied     |
| 49{10}   | 299.33 | 2.57 | 0 | 3 | Satisfied     |
| 49{13}   | 326.39 | 4.52 | 0 | 2 | Satisfied     |
| 49{15}   | 323.35 | 3.64 | 0 | 3 | Satisfied     |
| 52{1,1}  | 214.27 | 1.71 | 0 | 3 | Satisfied     |
| 52{12,2} | 358.48 | 5.19 | 0 | 3 | One violation |
| 53{1}    | 286.33 | 1.57 | 0 | 4 | Satisfied     |
| 53{14}   | 392.45 | 3.14 | 0 | 5 | Satisfied     |

<sup>a</sup> ClogP was calculated using the default weighted method of ChemAxon's logP plugin.

### References.

1. Pangborn, A. B.; Giardello, M. A.; Grubbs, R. H.; Rosen, R. K.; Timmers, F. J. *Organometallics* **1996**, *15*, 1518-1520.
2. Gottlieb, H. E.; Kotlyar, V.; Nudelman A. *J. Org. Chem.* **1997**, *62*, 7512-7515.
3. Still, W. C.; Kahn, M.; Mitra, A. *J. Org. Chem.* **1978**, *43*, 2923-2925.
4. Pelkey, E. T.; Gribble, G. W. *Tetrahedron Lett.* **1997**, *38*, 5603-5606.
5. Alajarín, M.; Cabrera, J.; Pastor, A.; Villalgordo, J. M. *Tetrahedron Lett.* **2007**, *48*, 3495-3499.
6. Main, C. A.; Petersson, H. M.; Rahman, S. S.; Hartley, R. C. *Tetrahedron* **2008**, *64*, 901-914.
7. Cledera, P.; Avendaño, C.; Menéndez, J. C. *Tetrahedron* **1998**, *54*, 12349-12360.



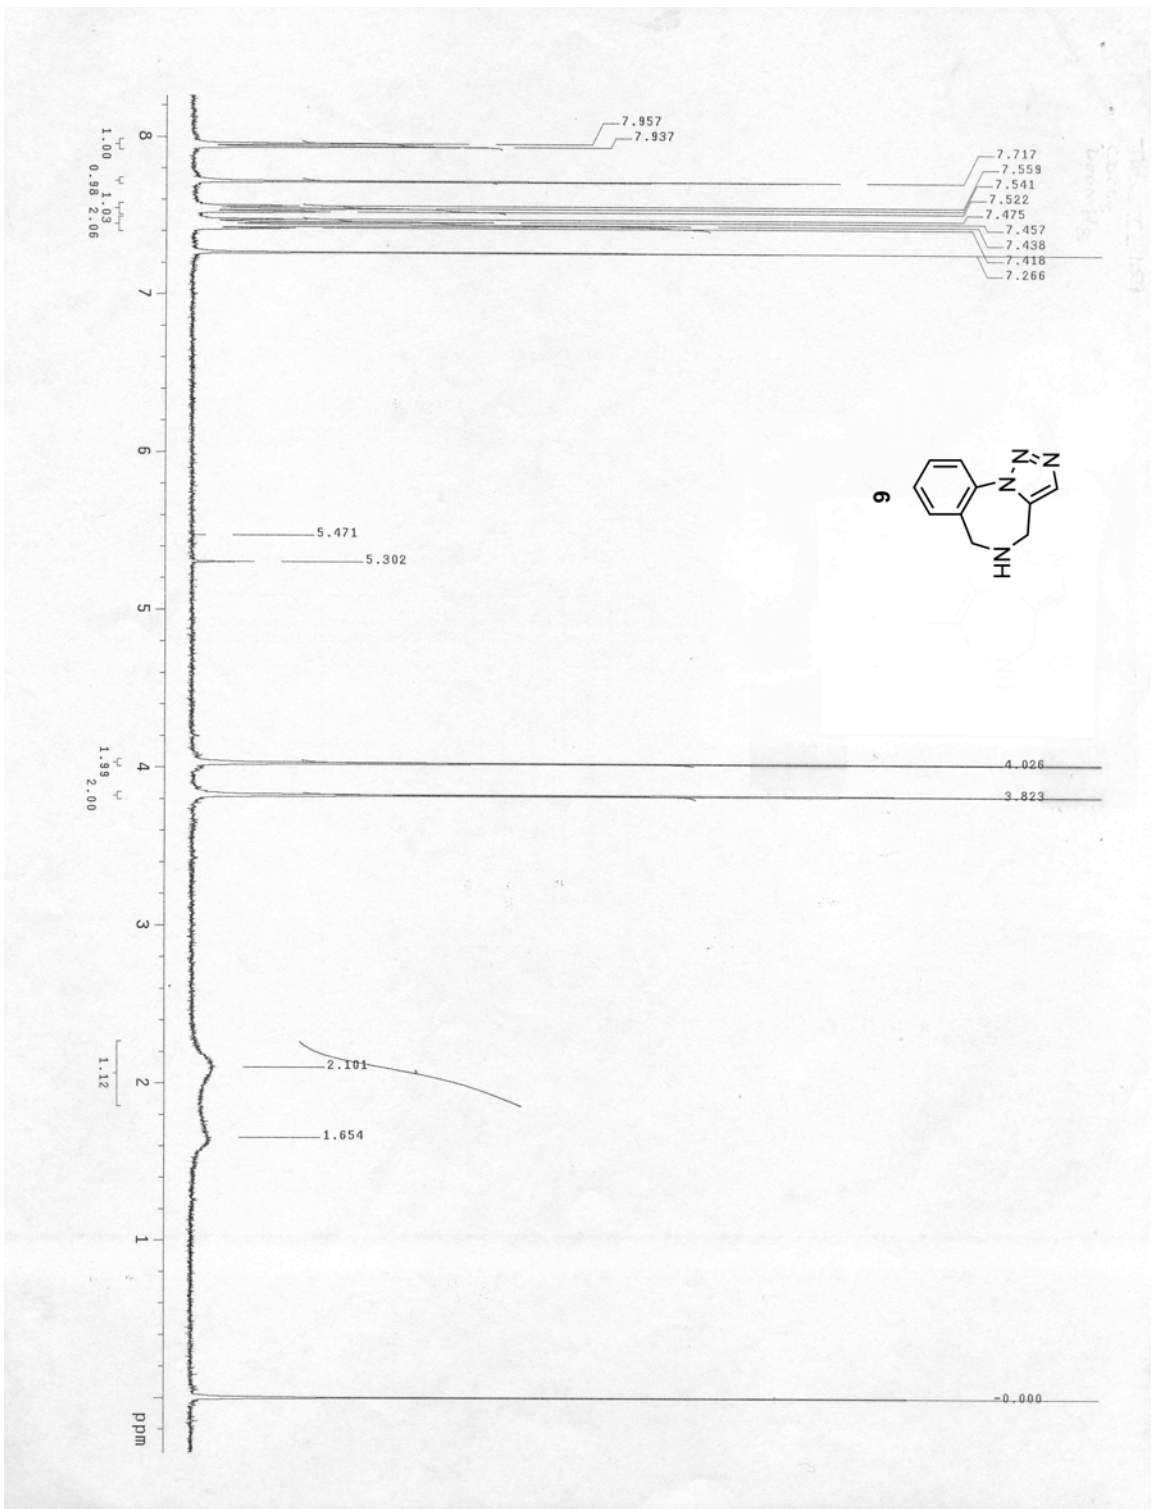

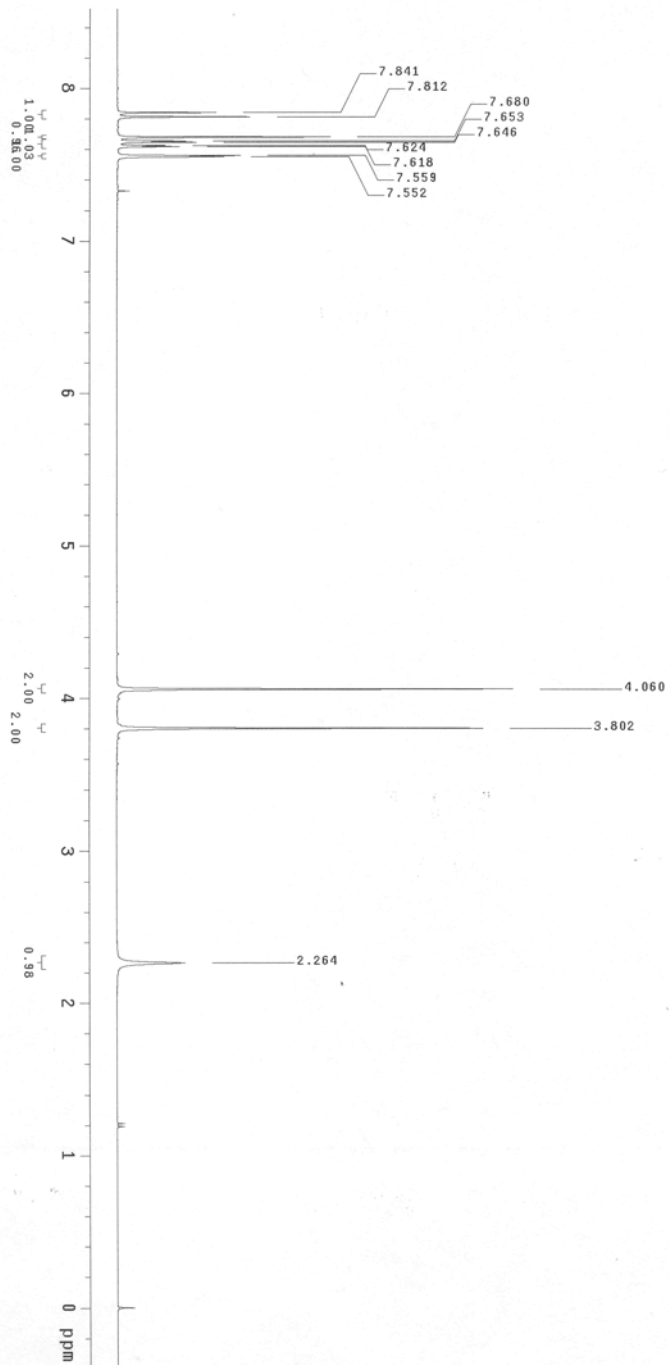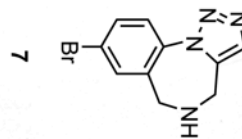

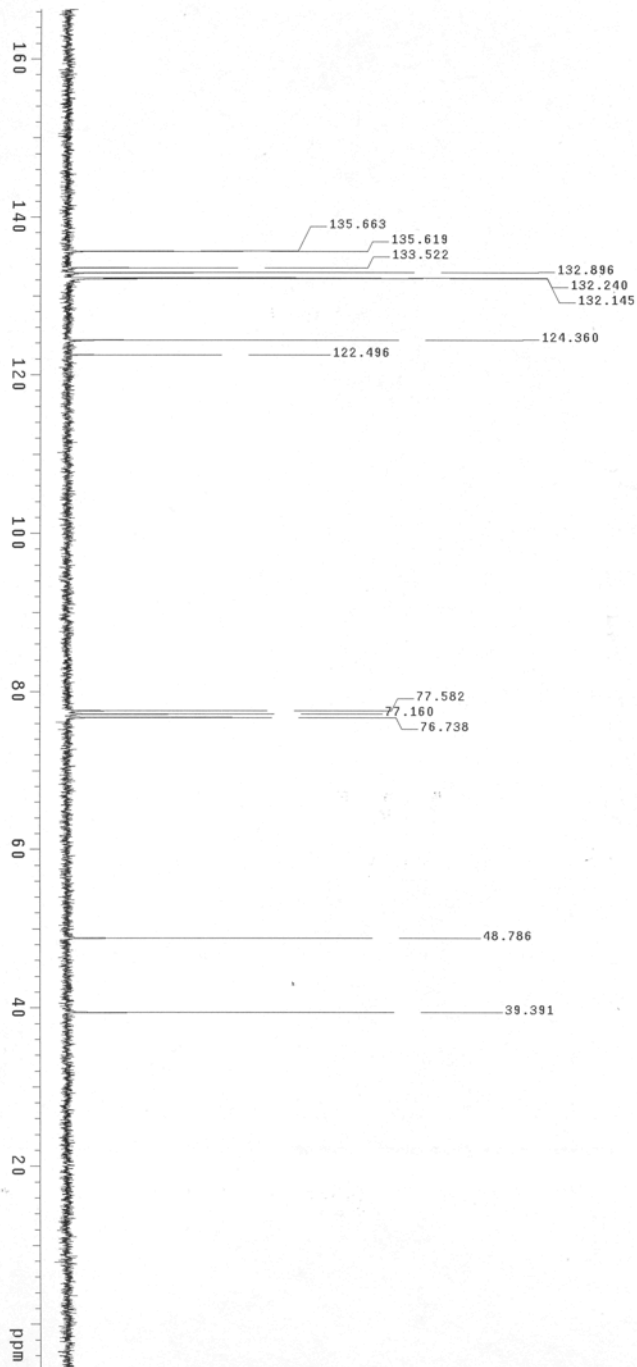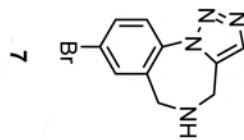

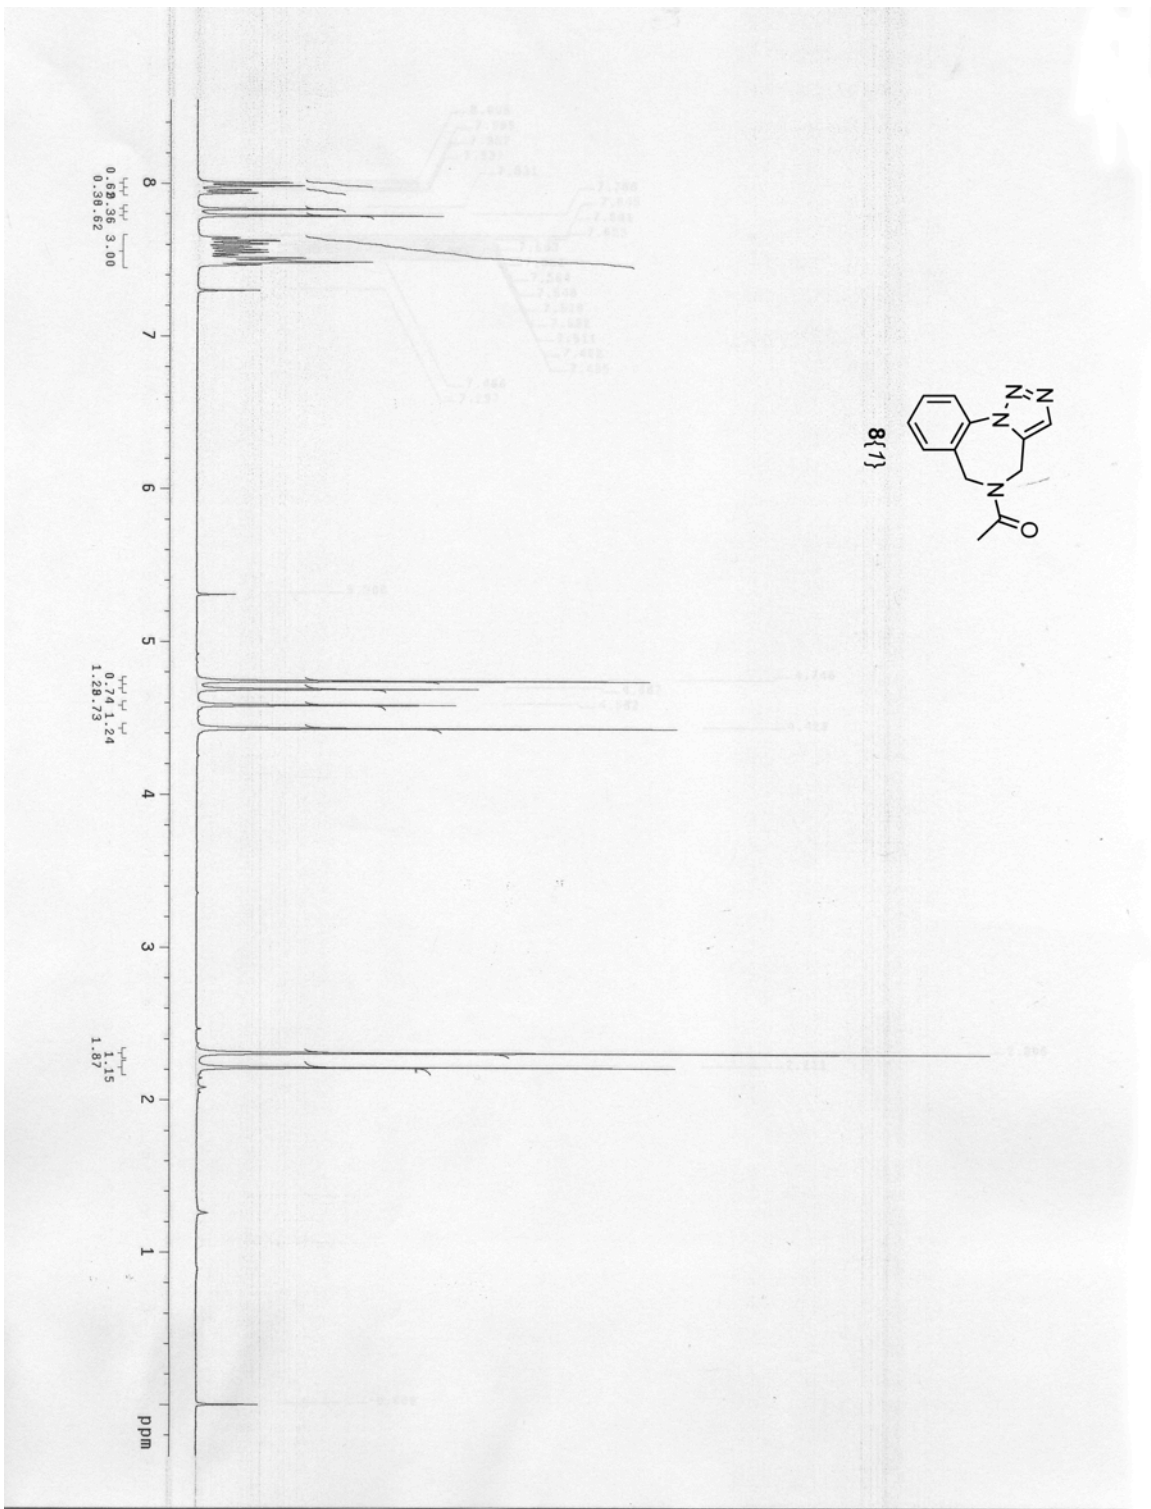

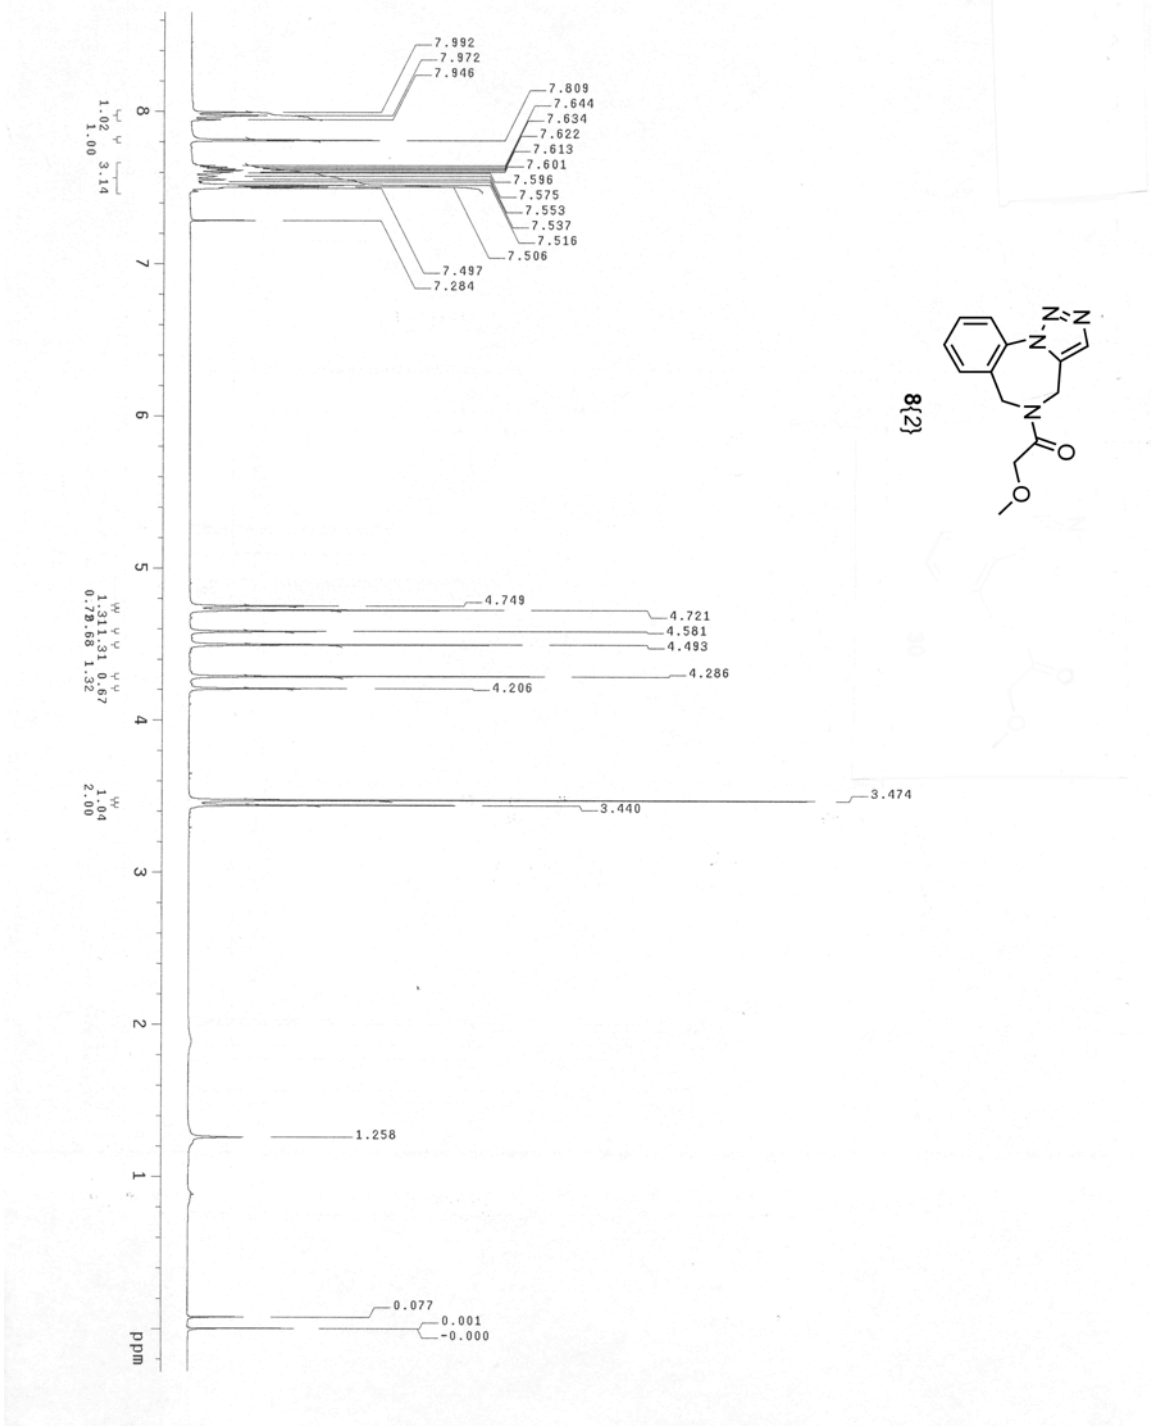

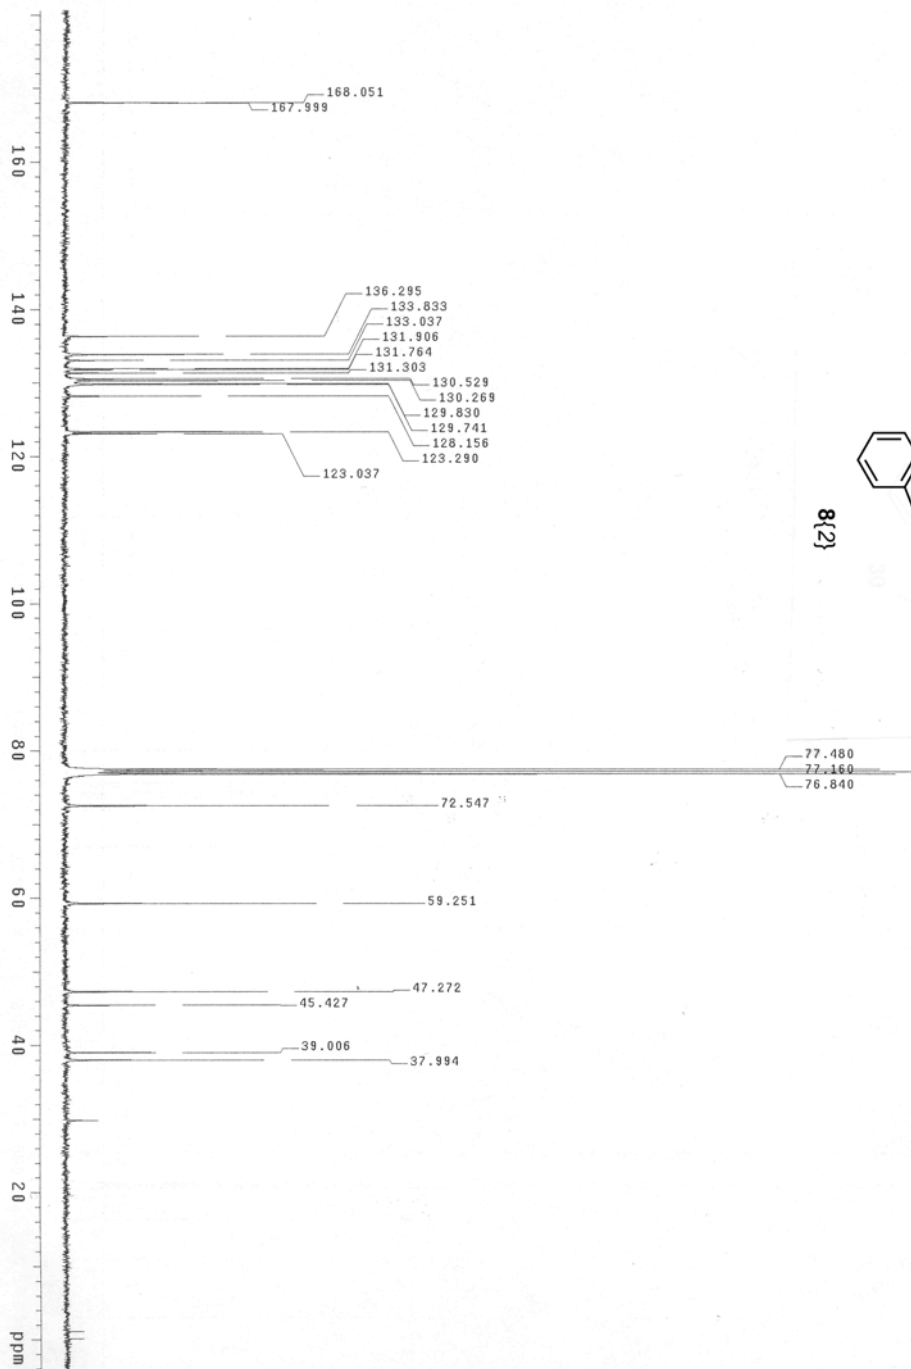

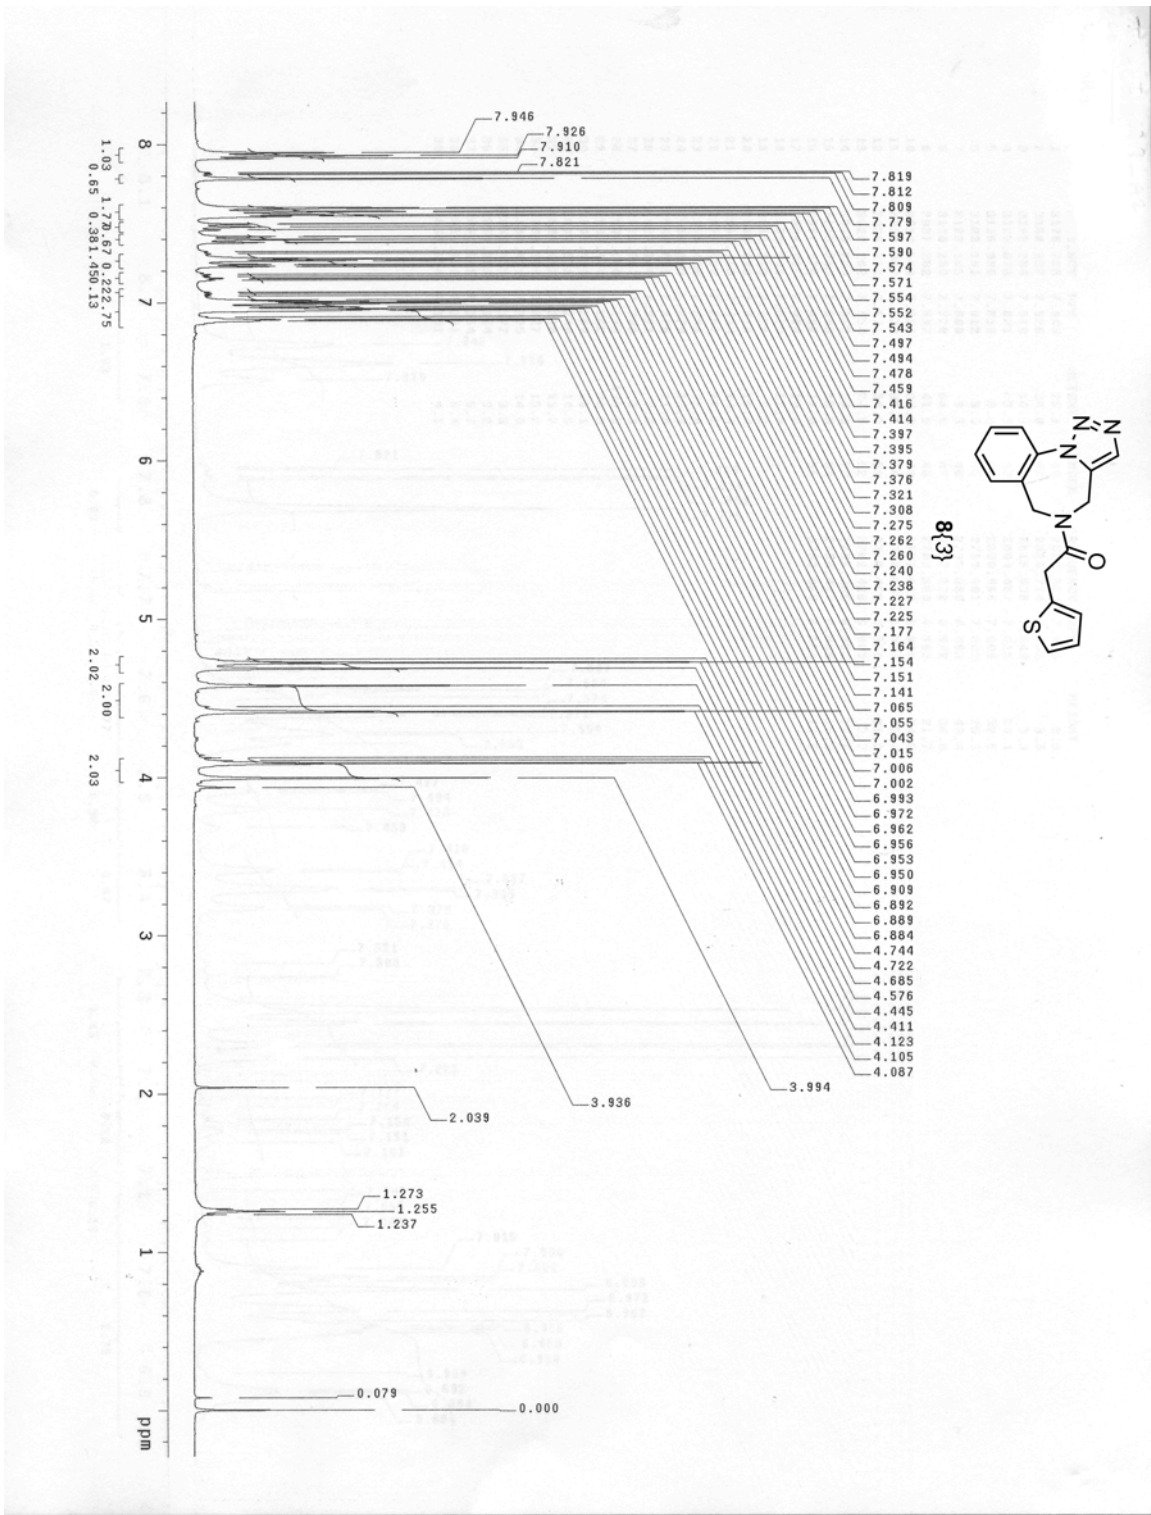

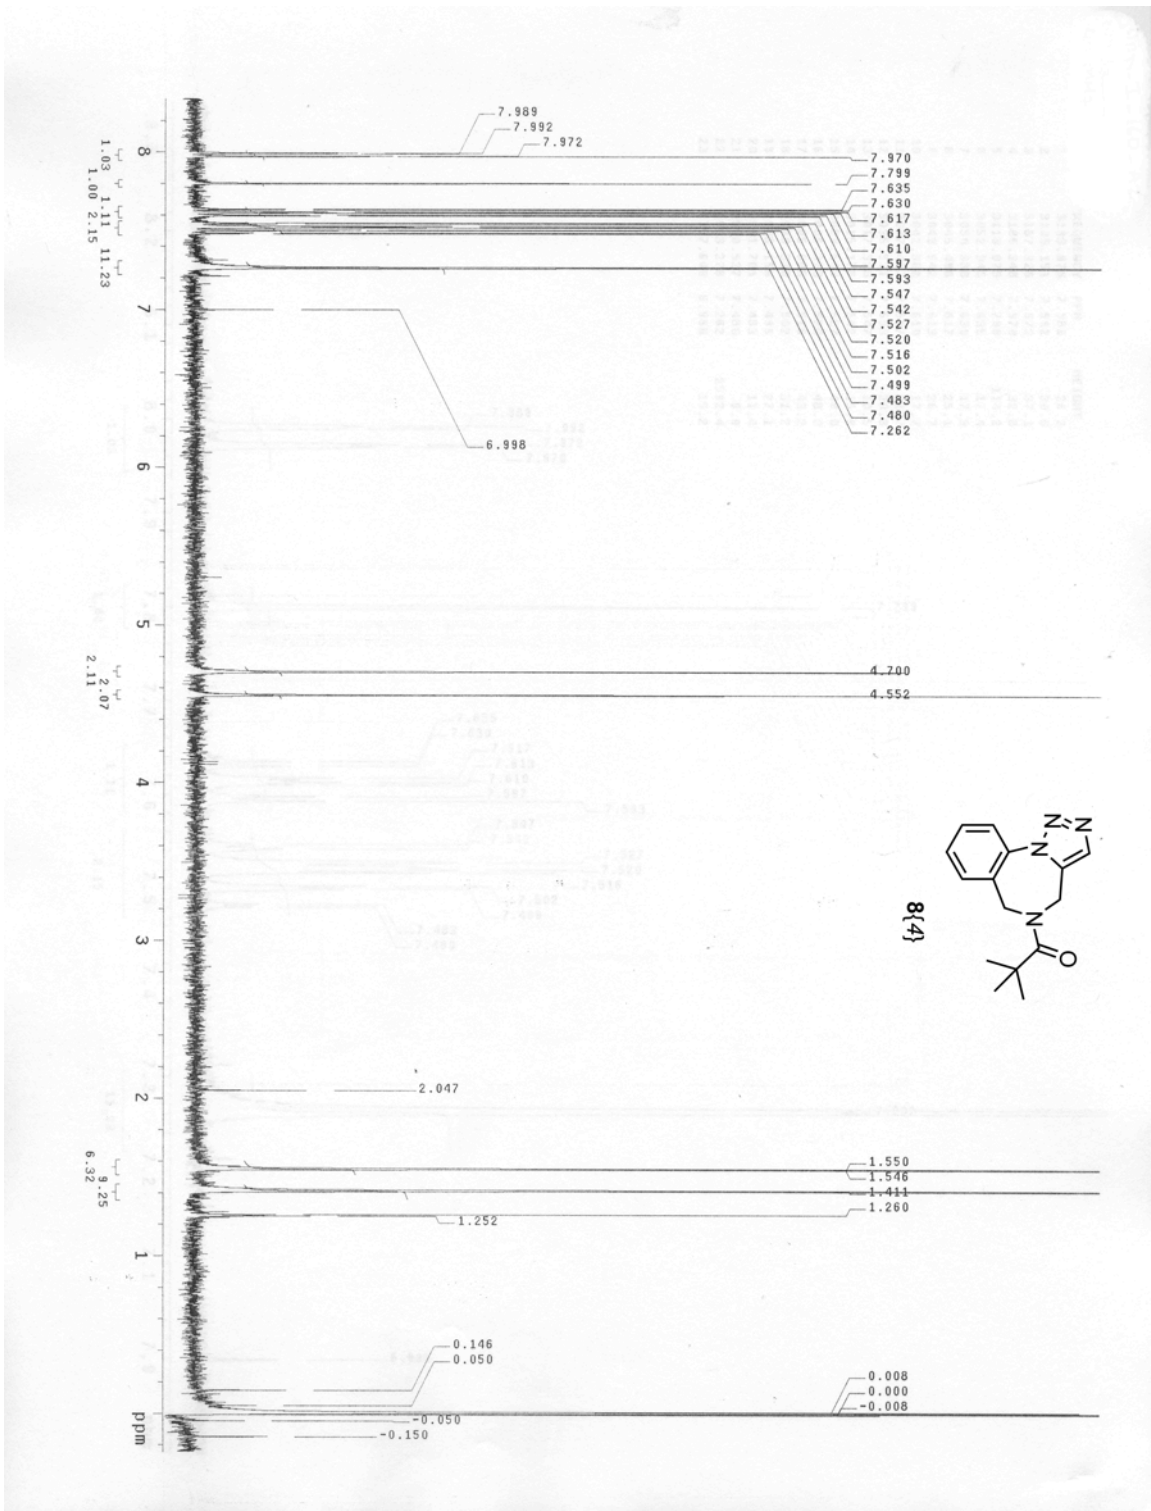



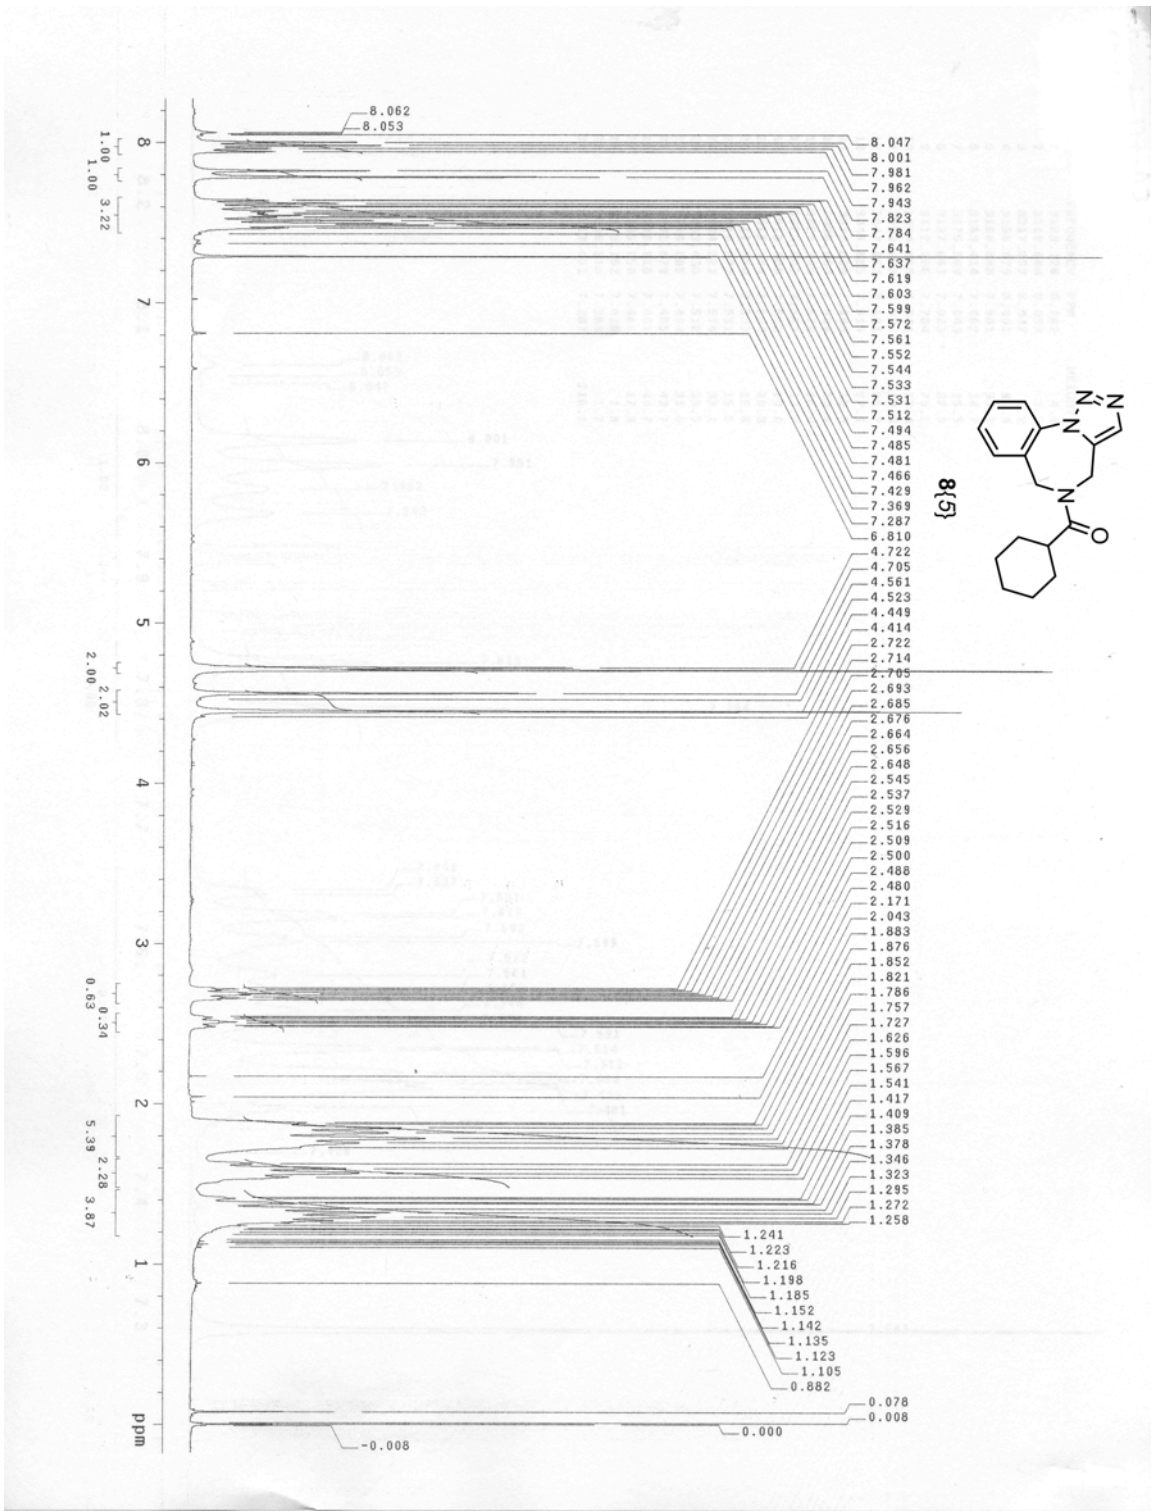

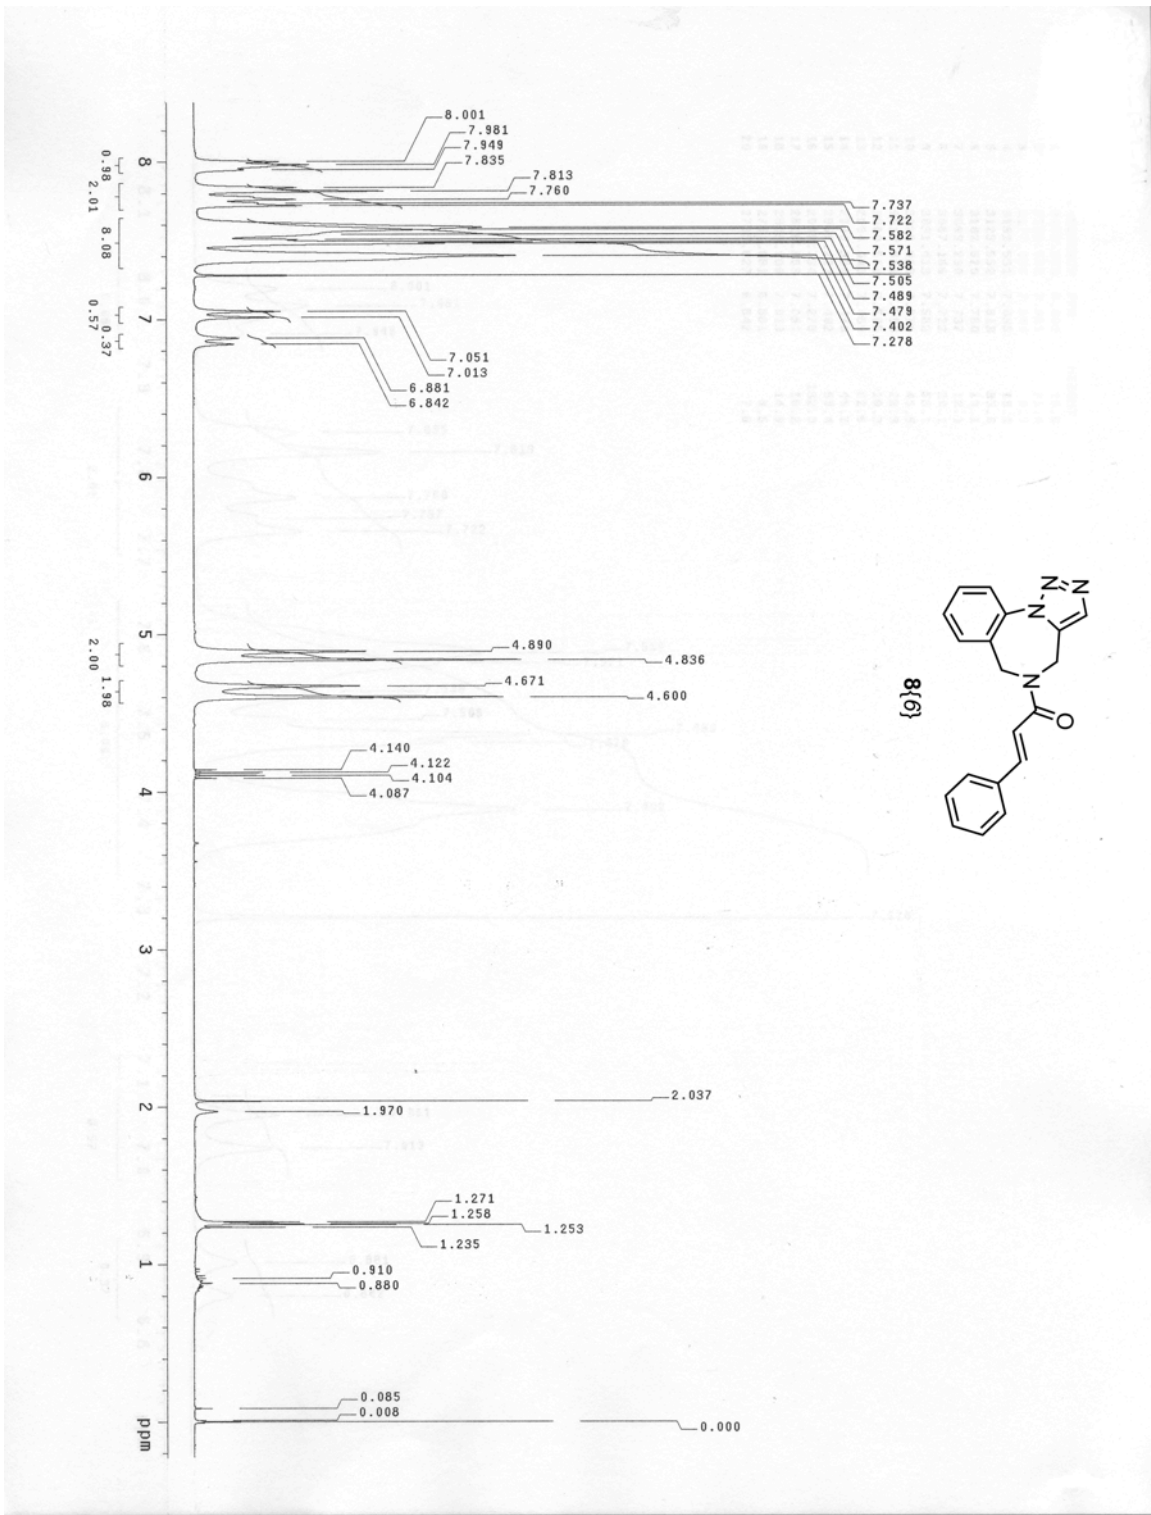

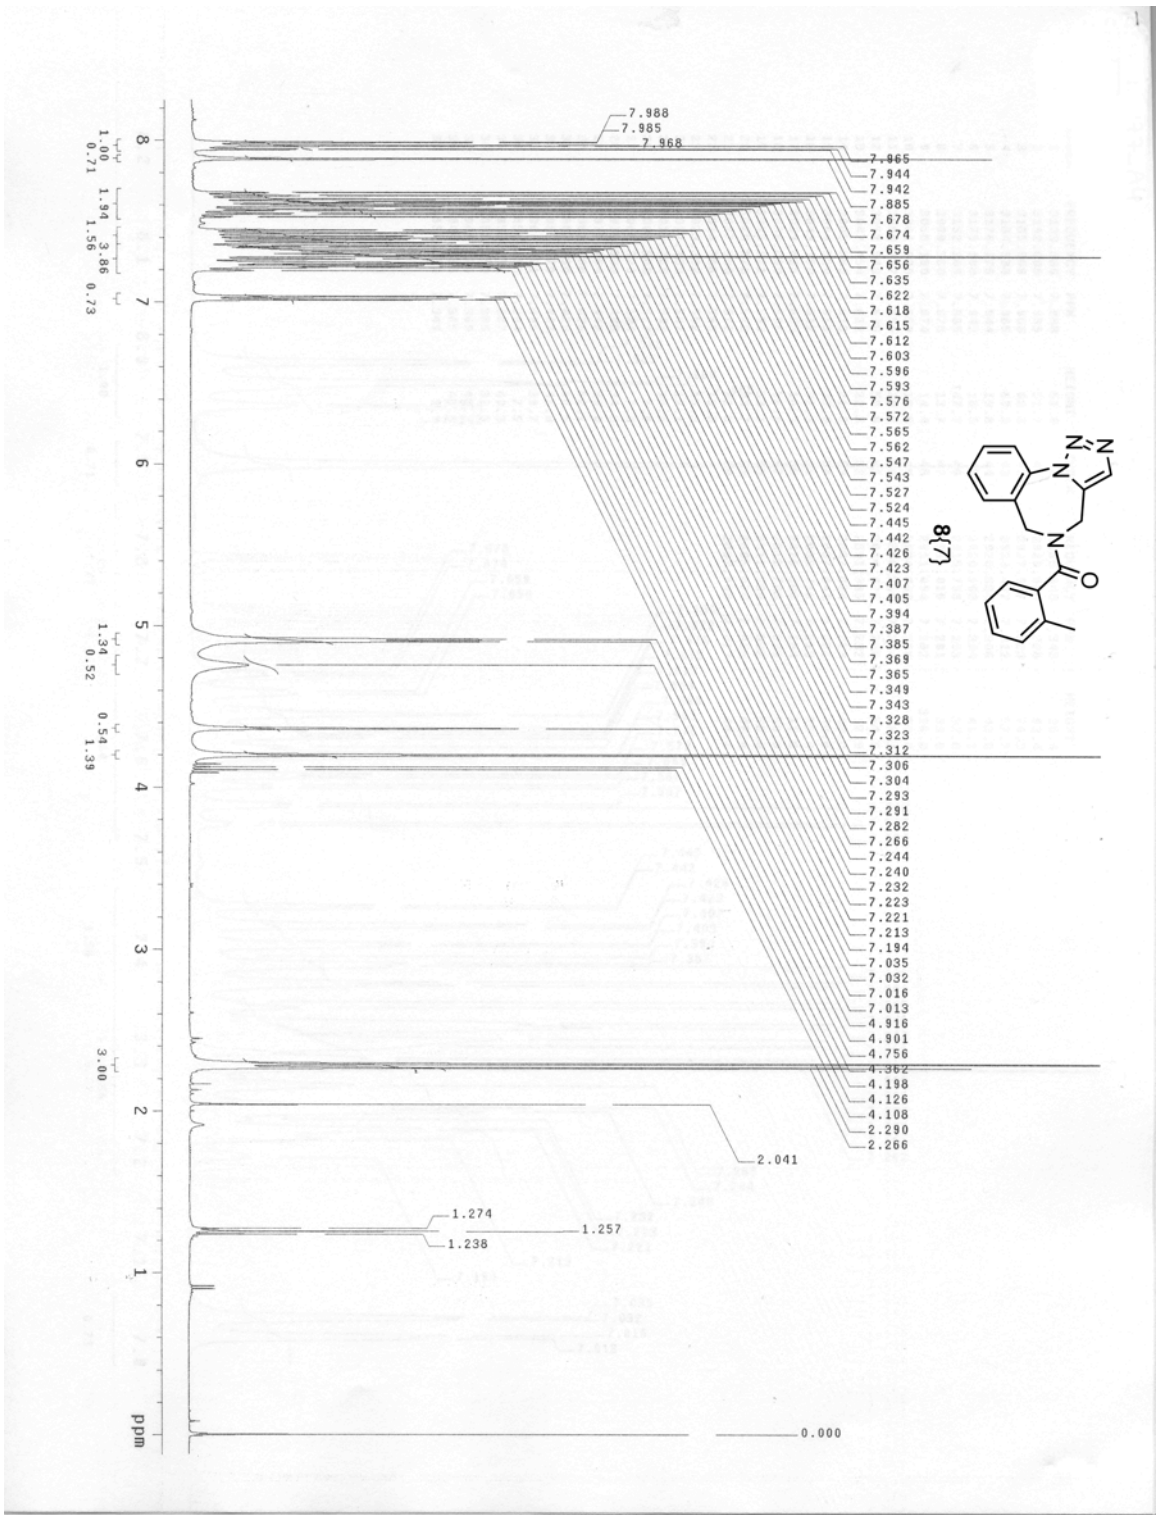

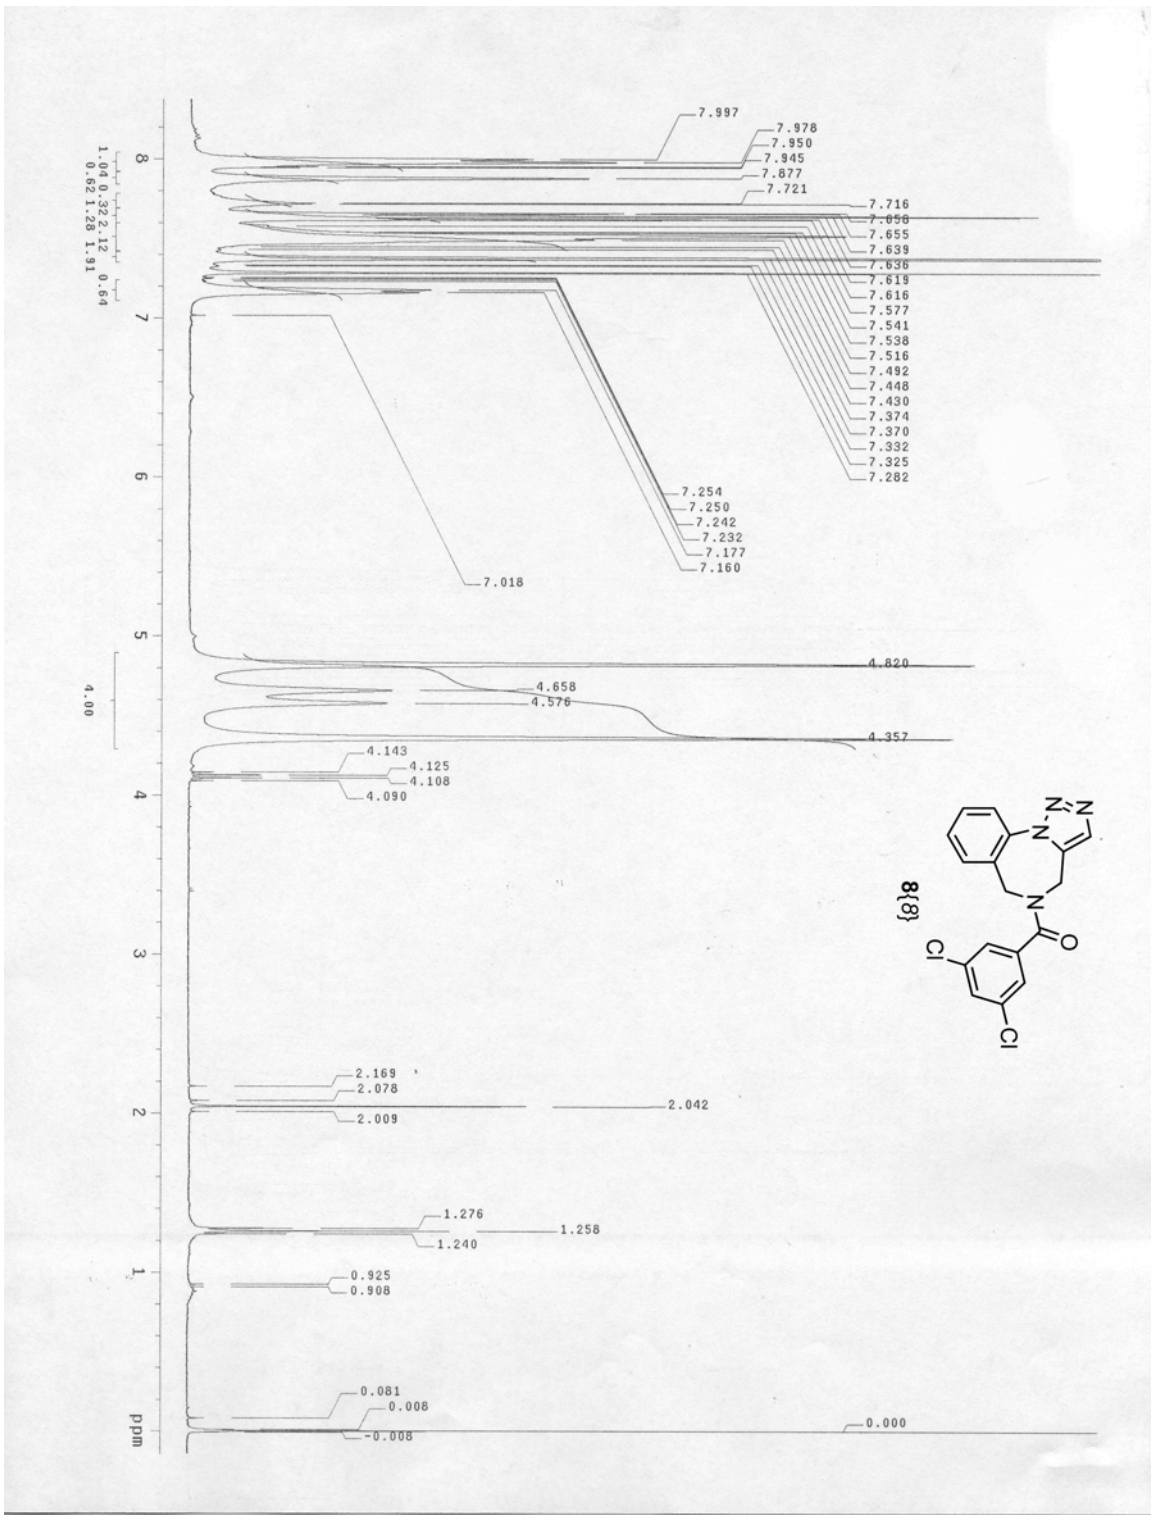

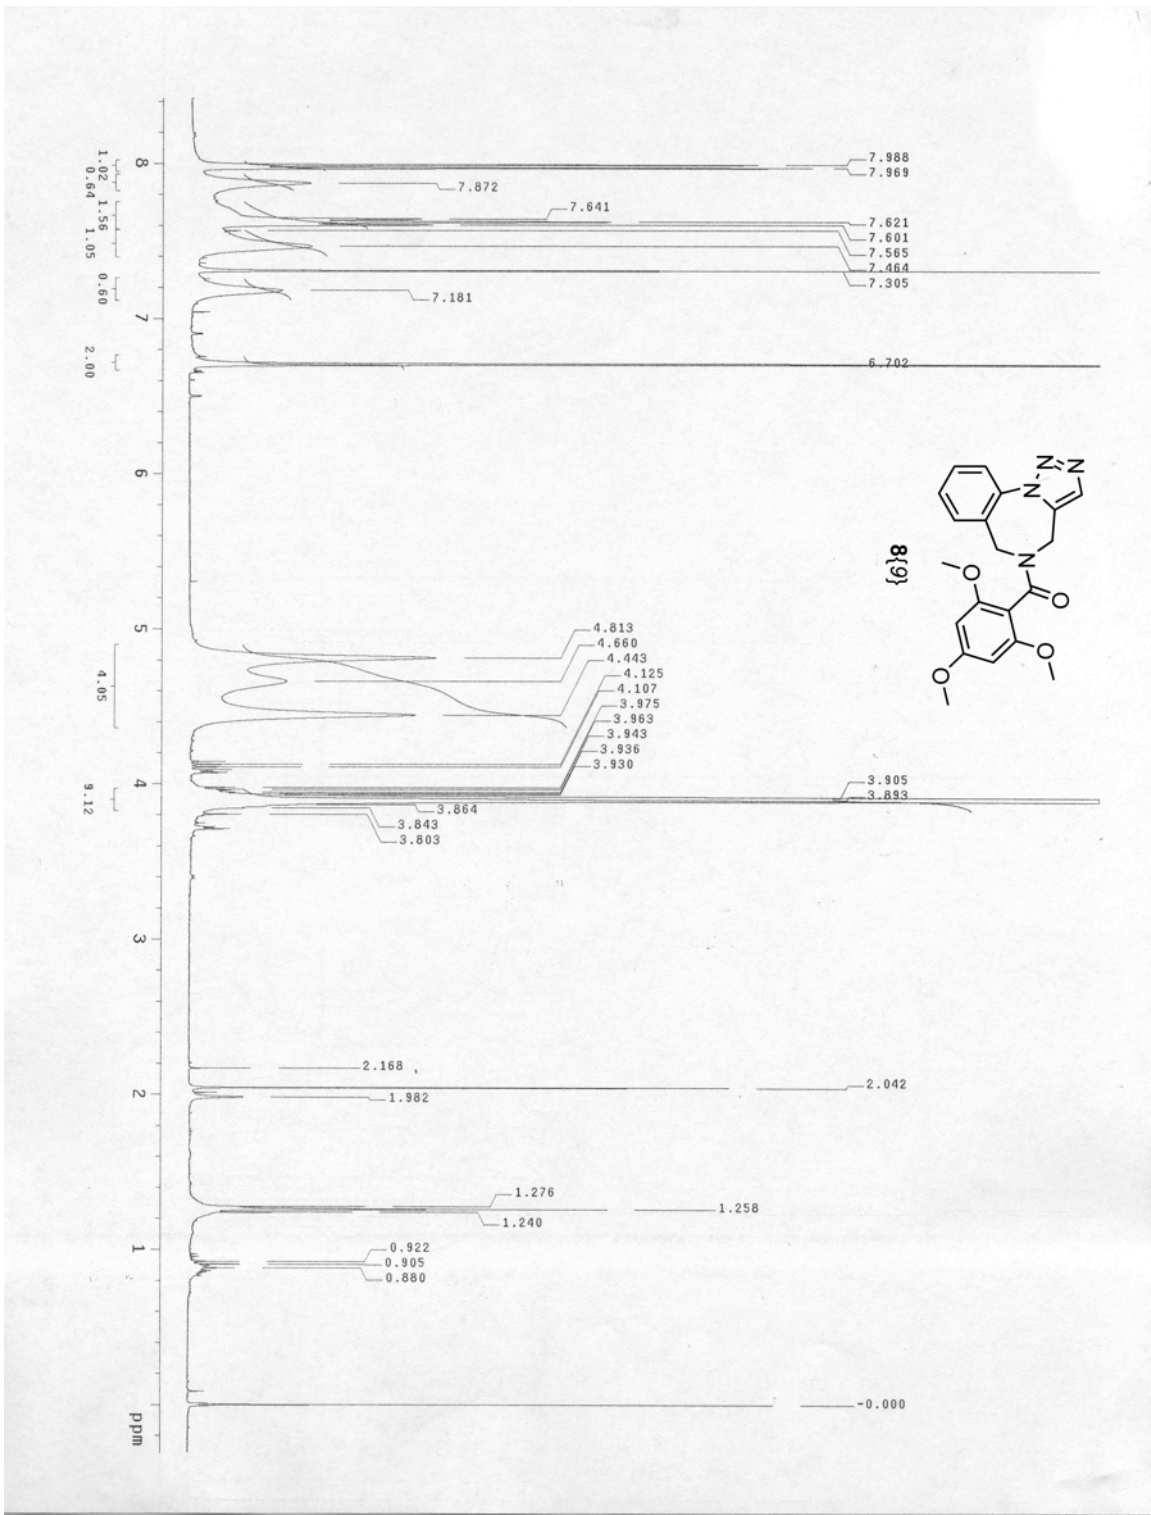

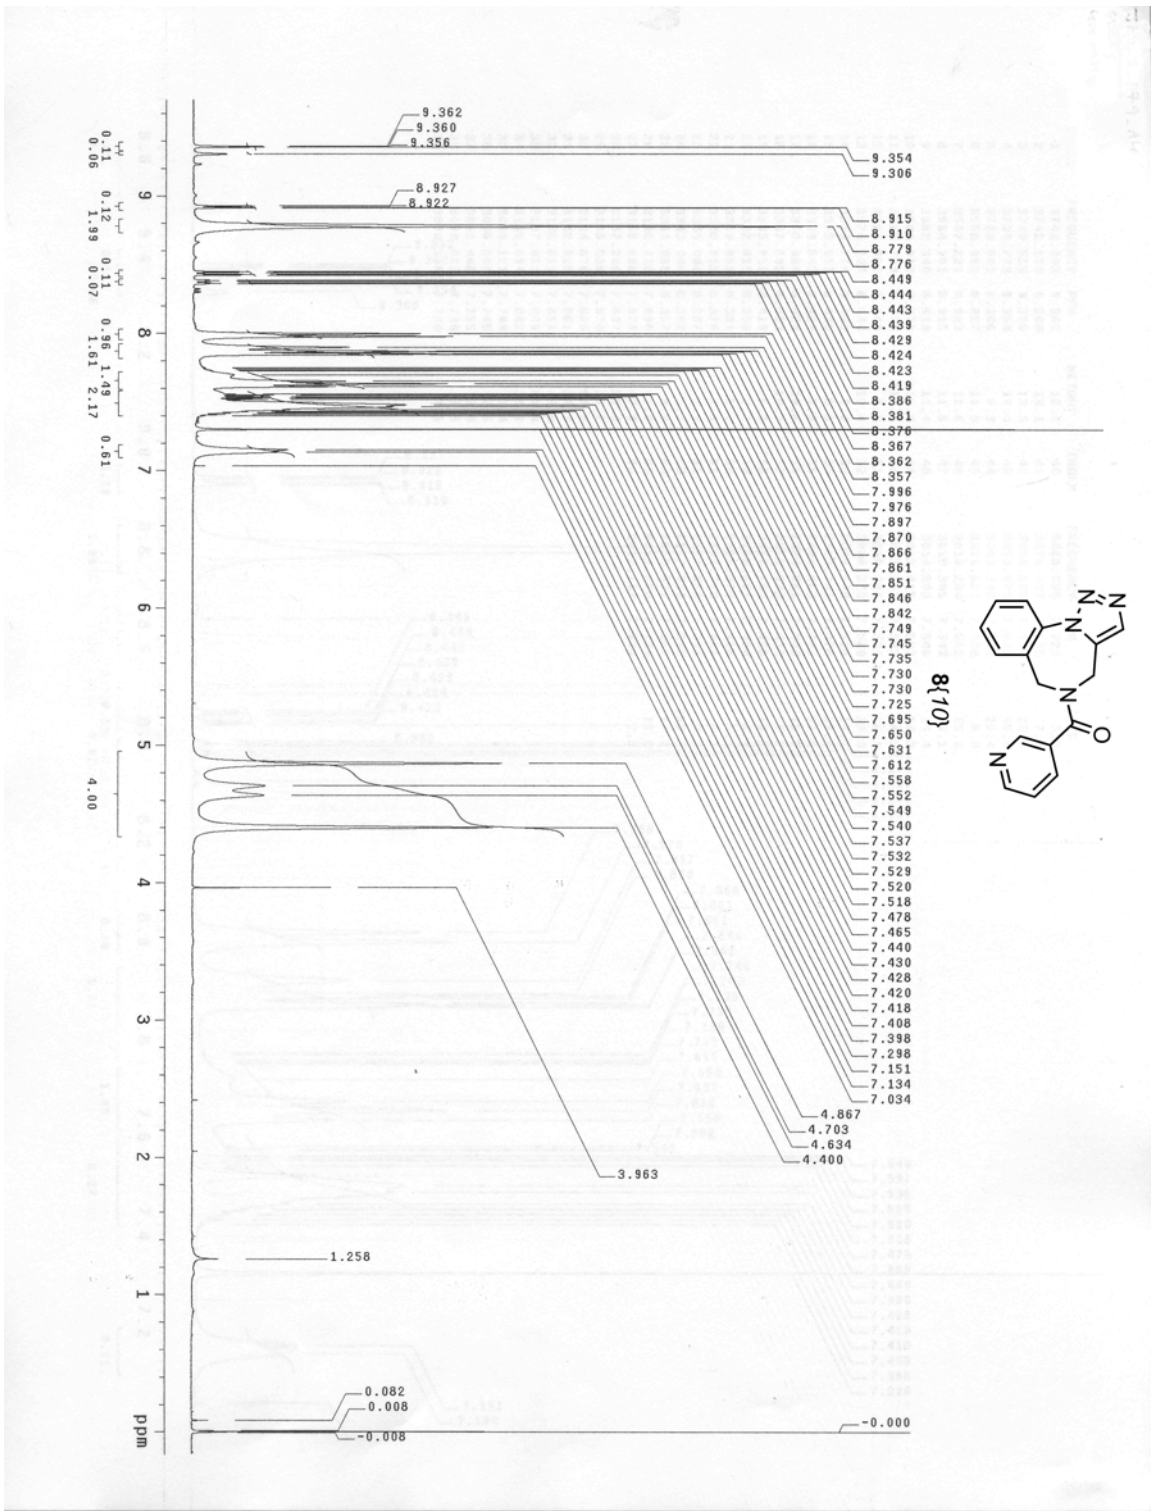

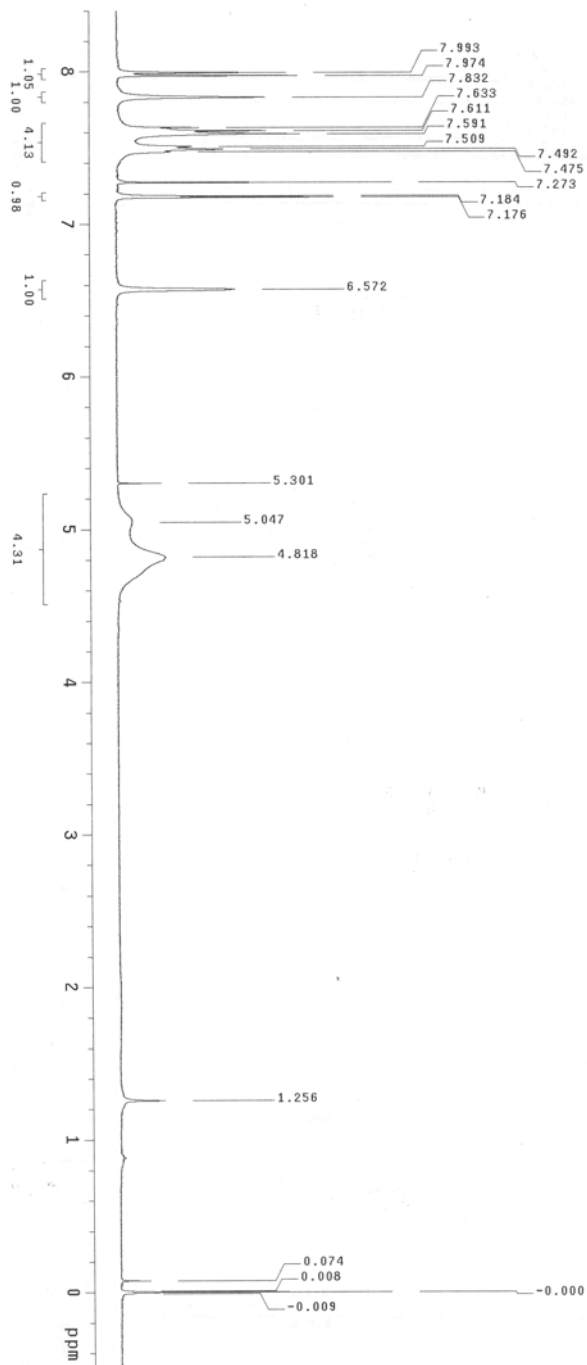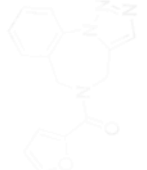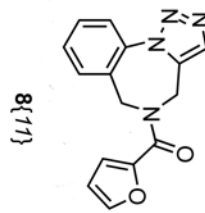





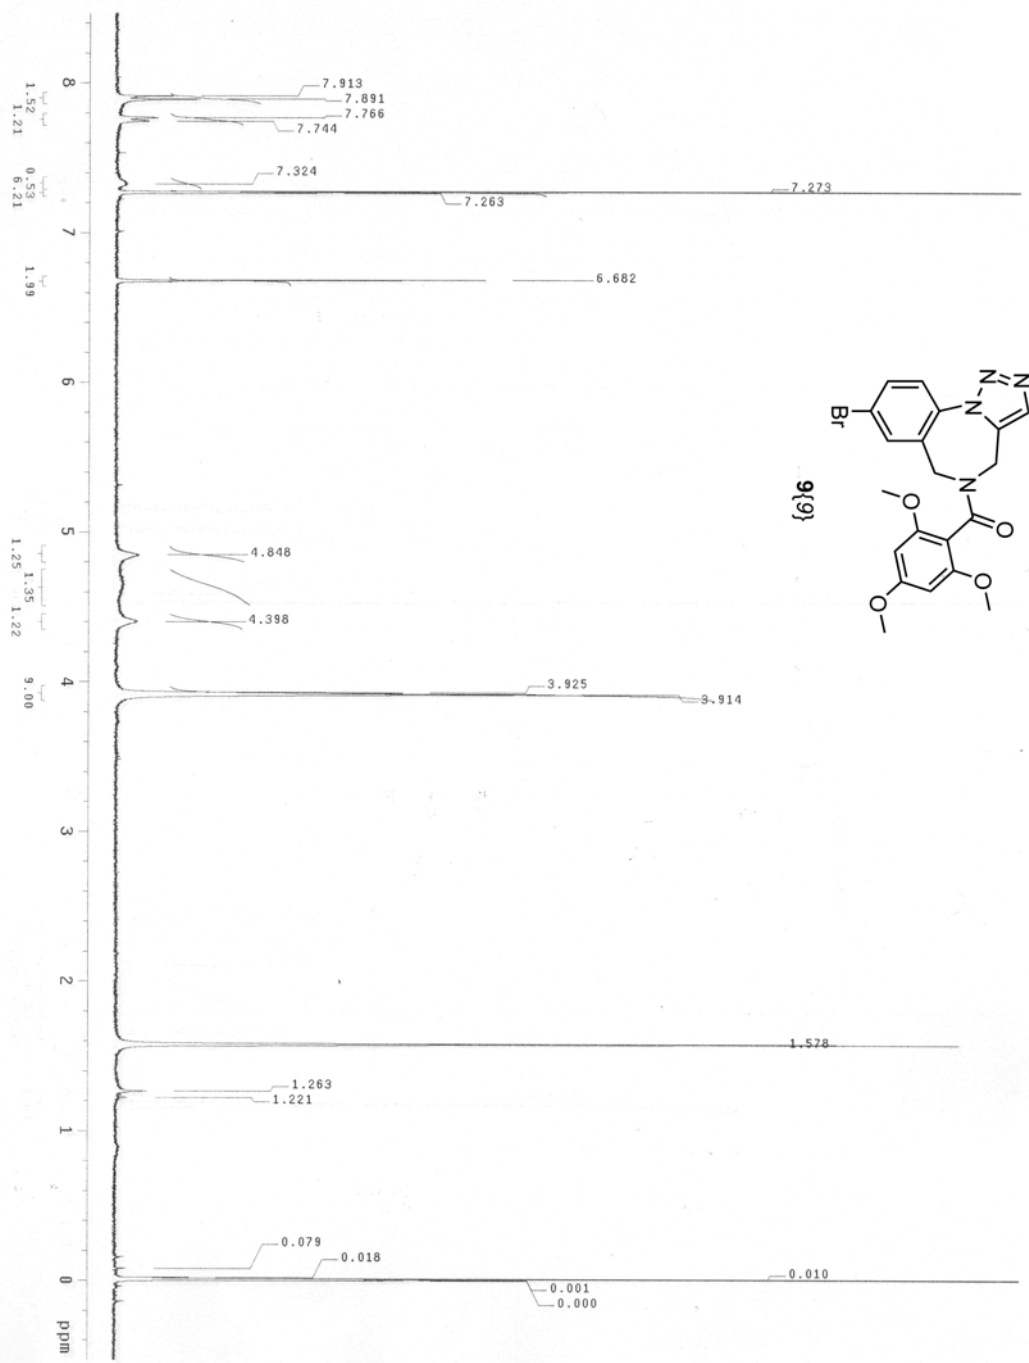

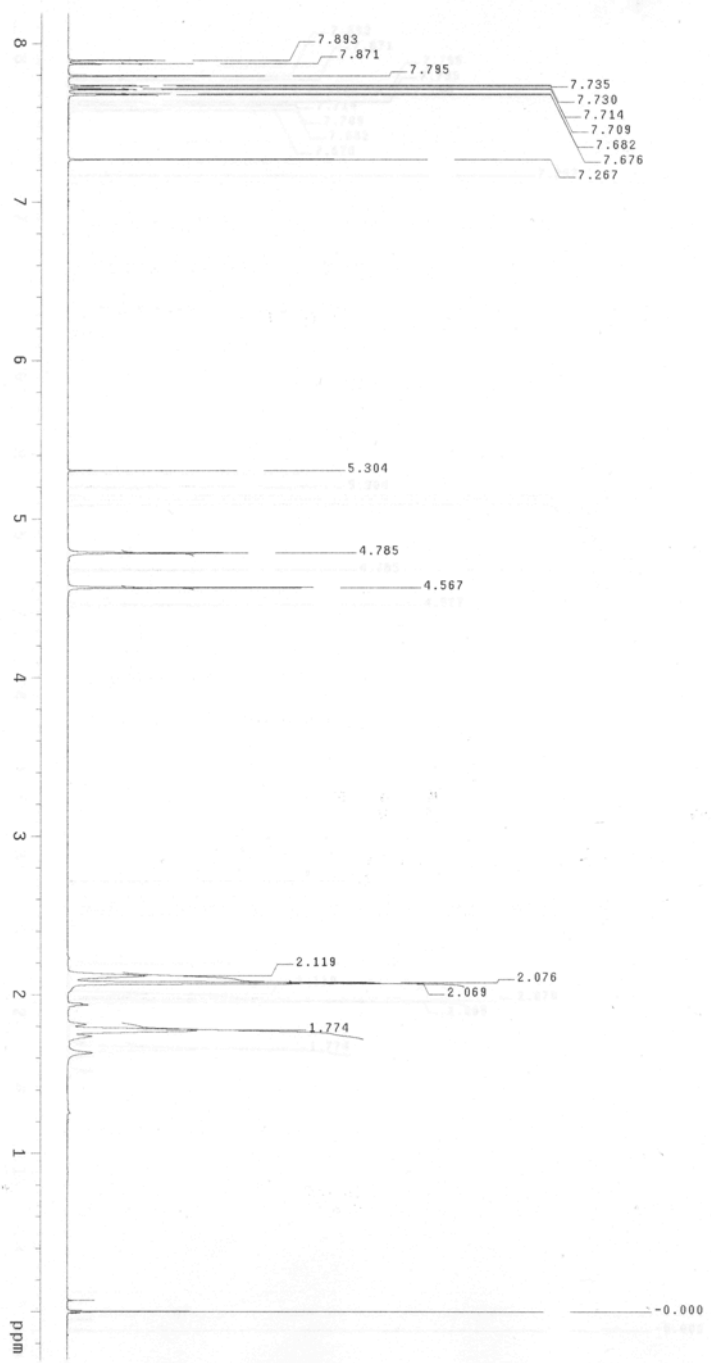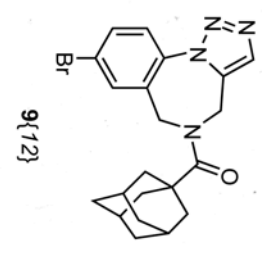

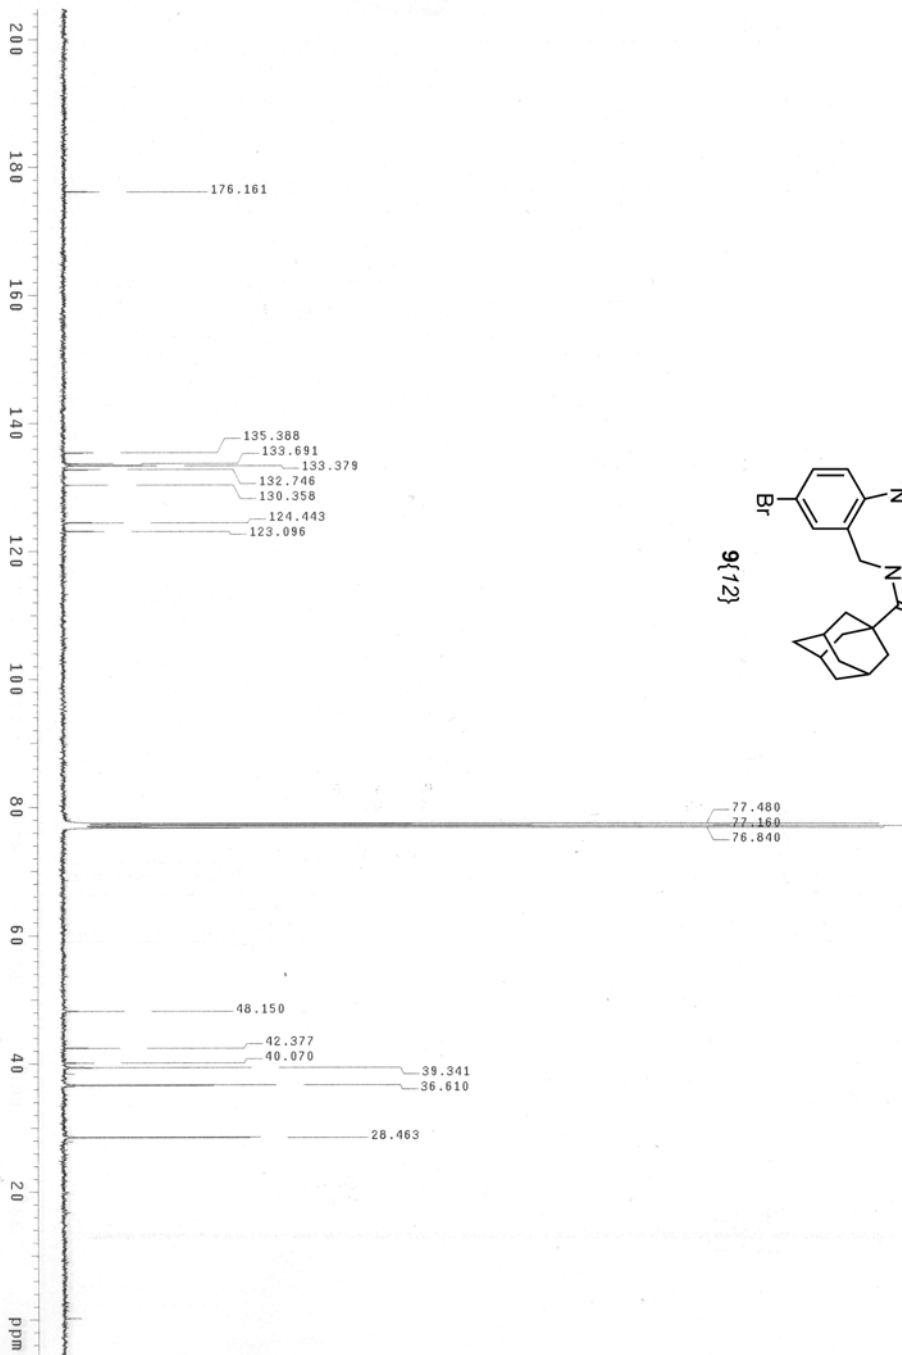

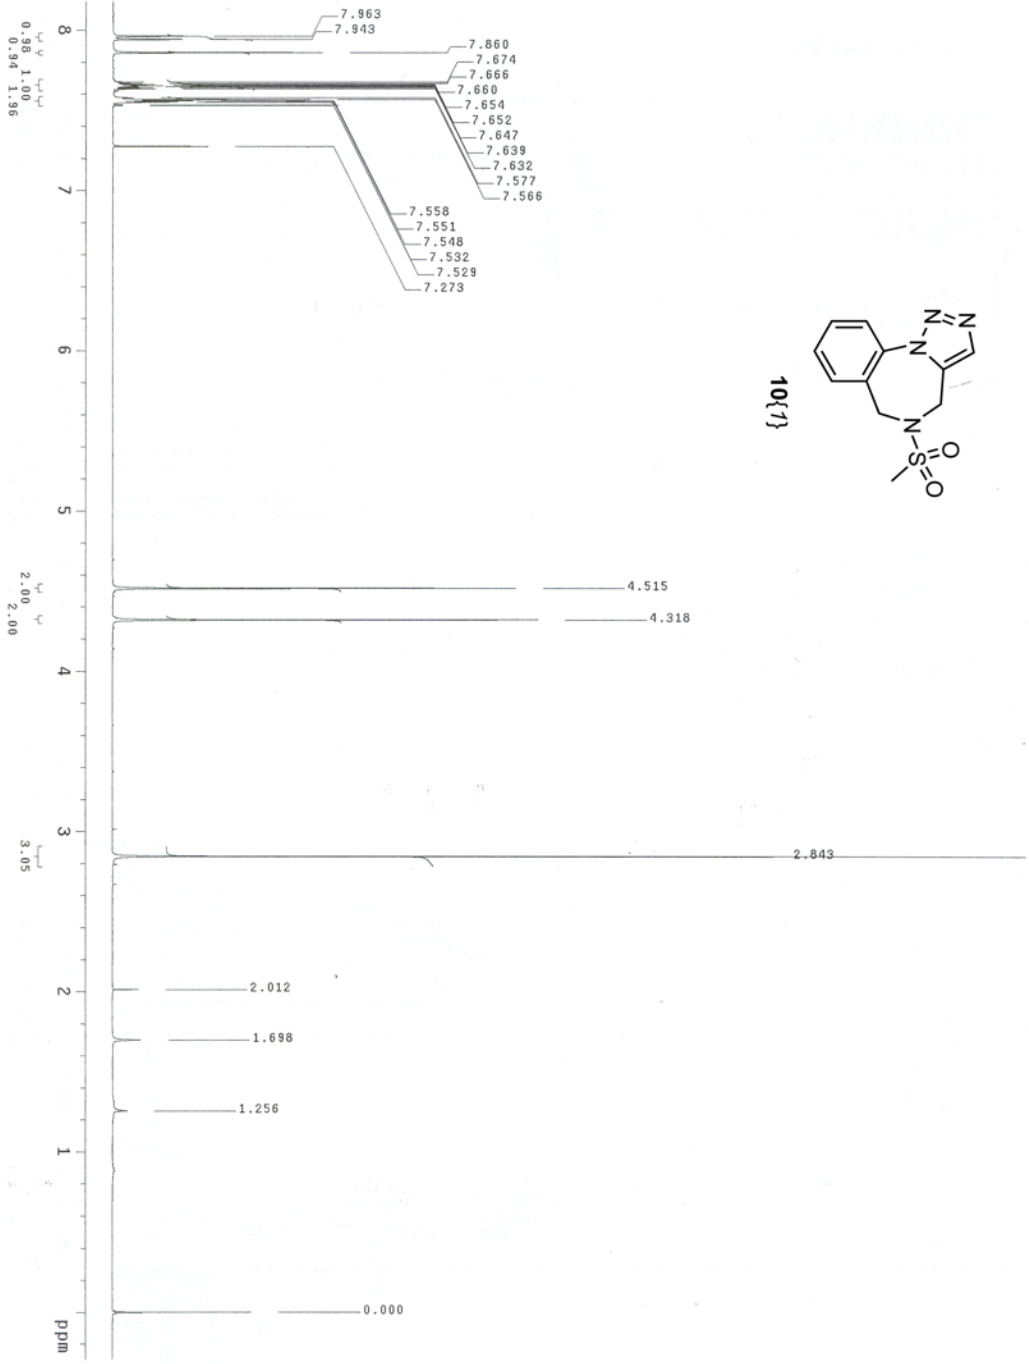

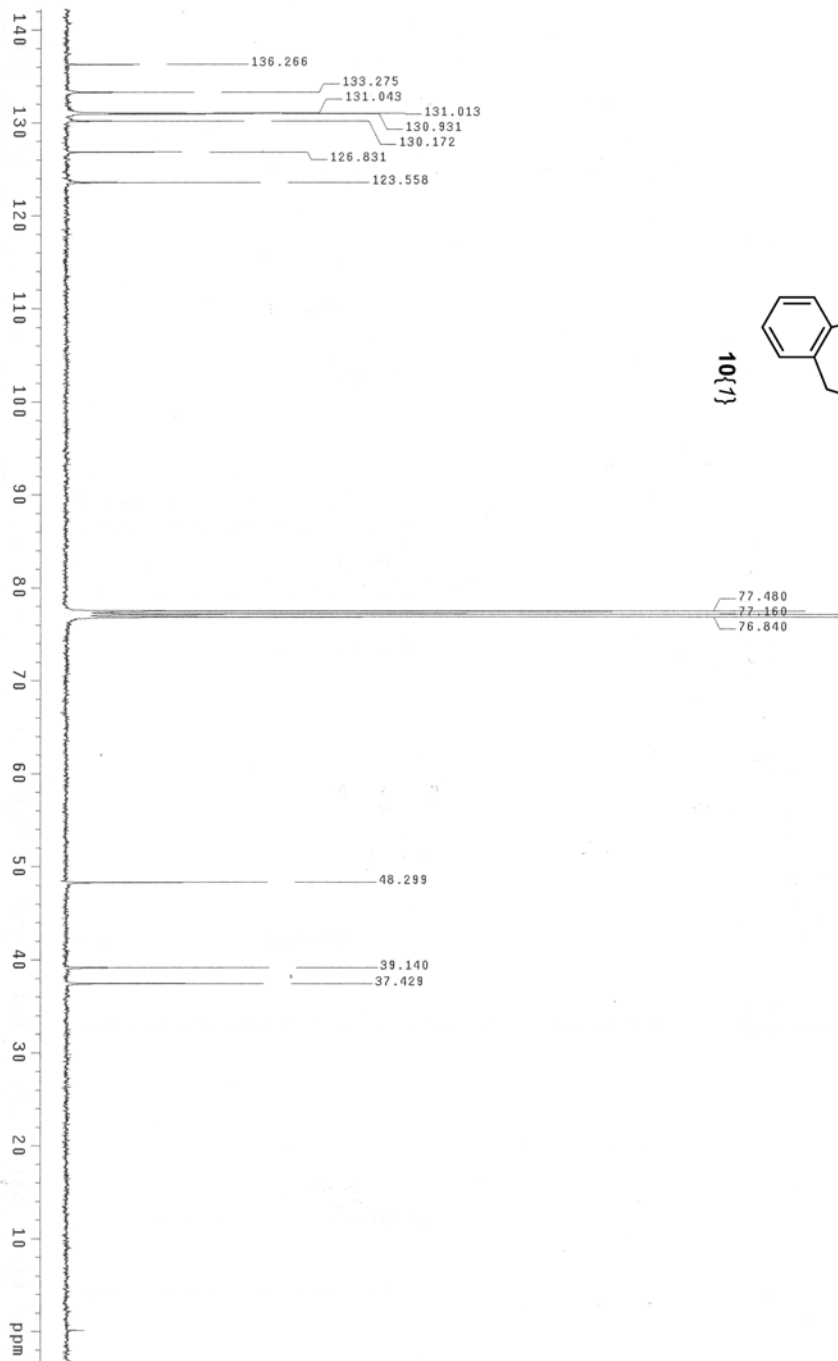

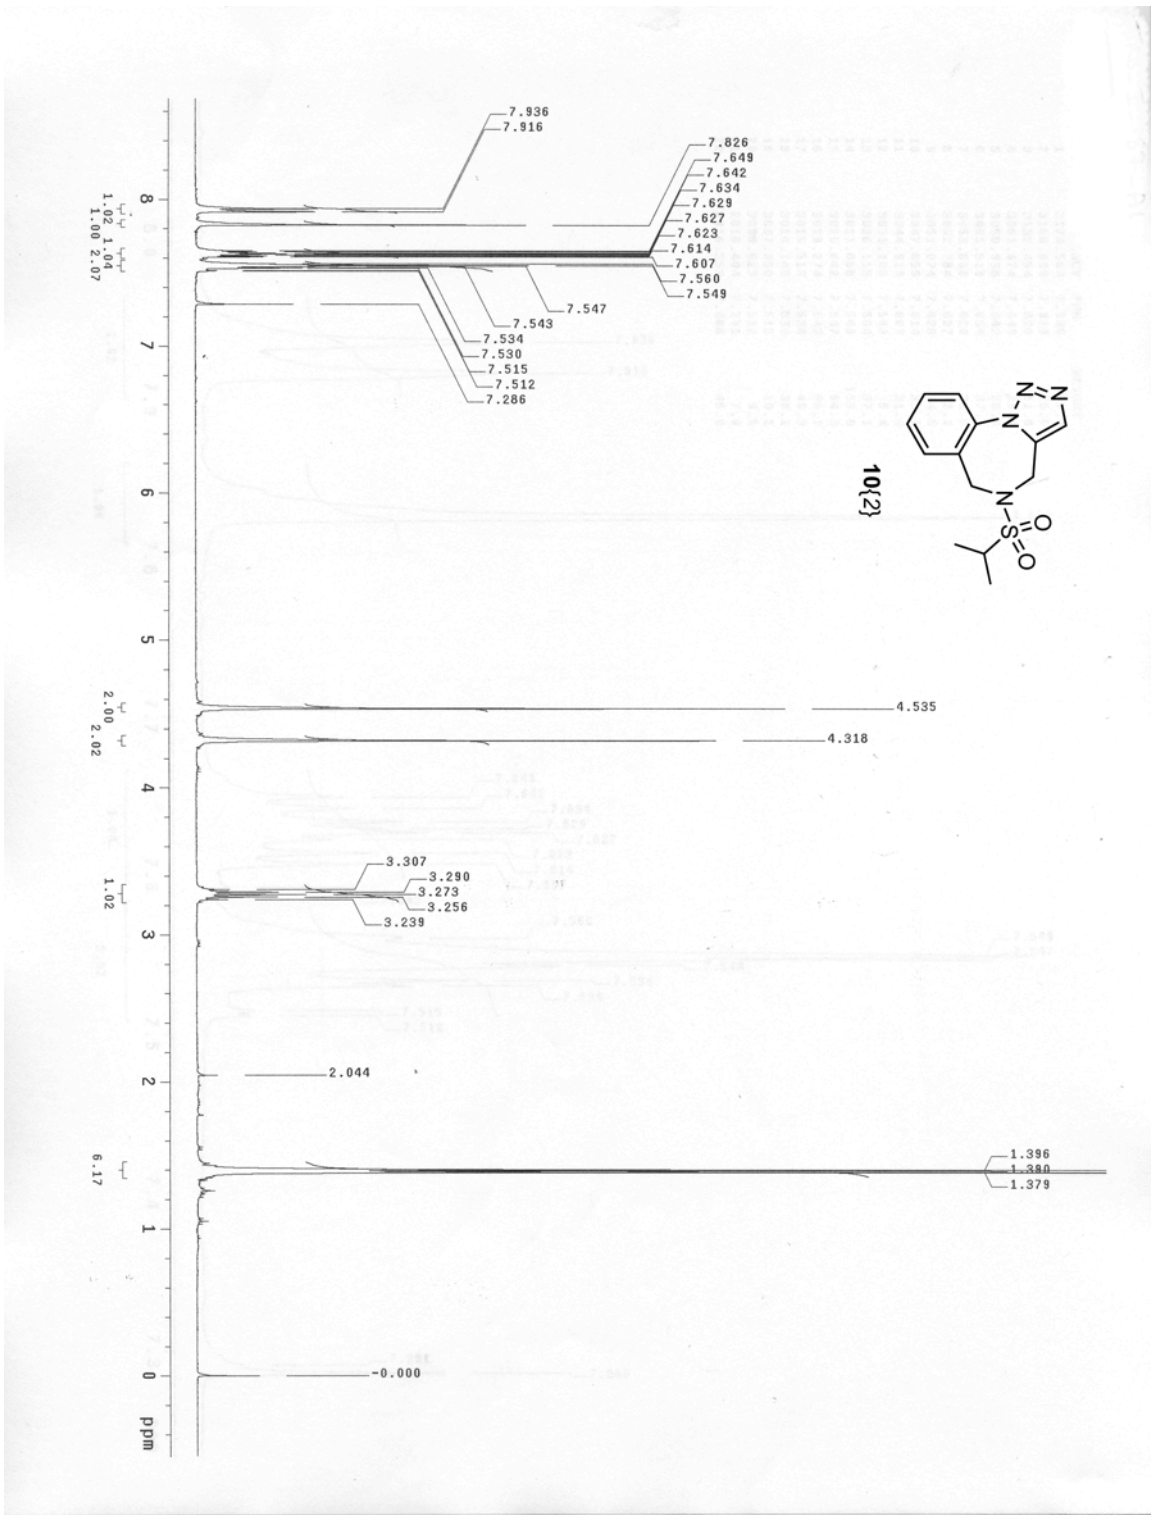

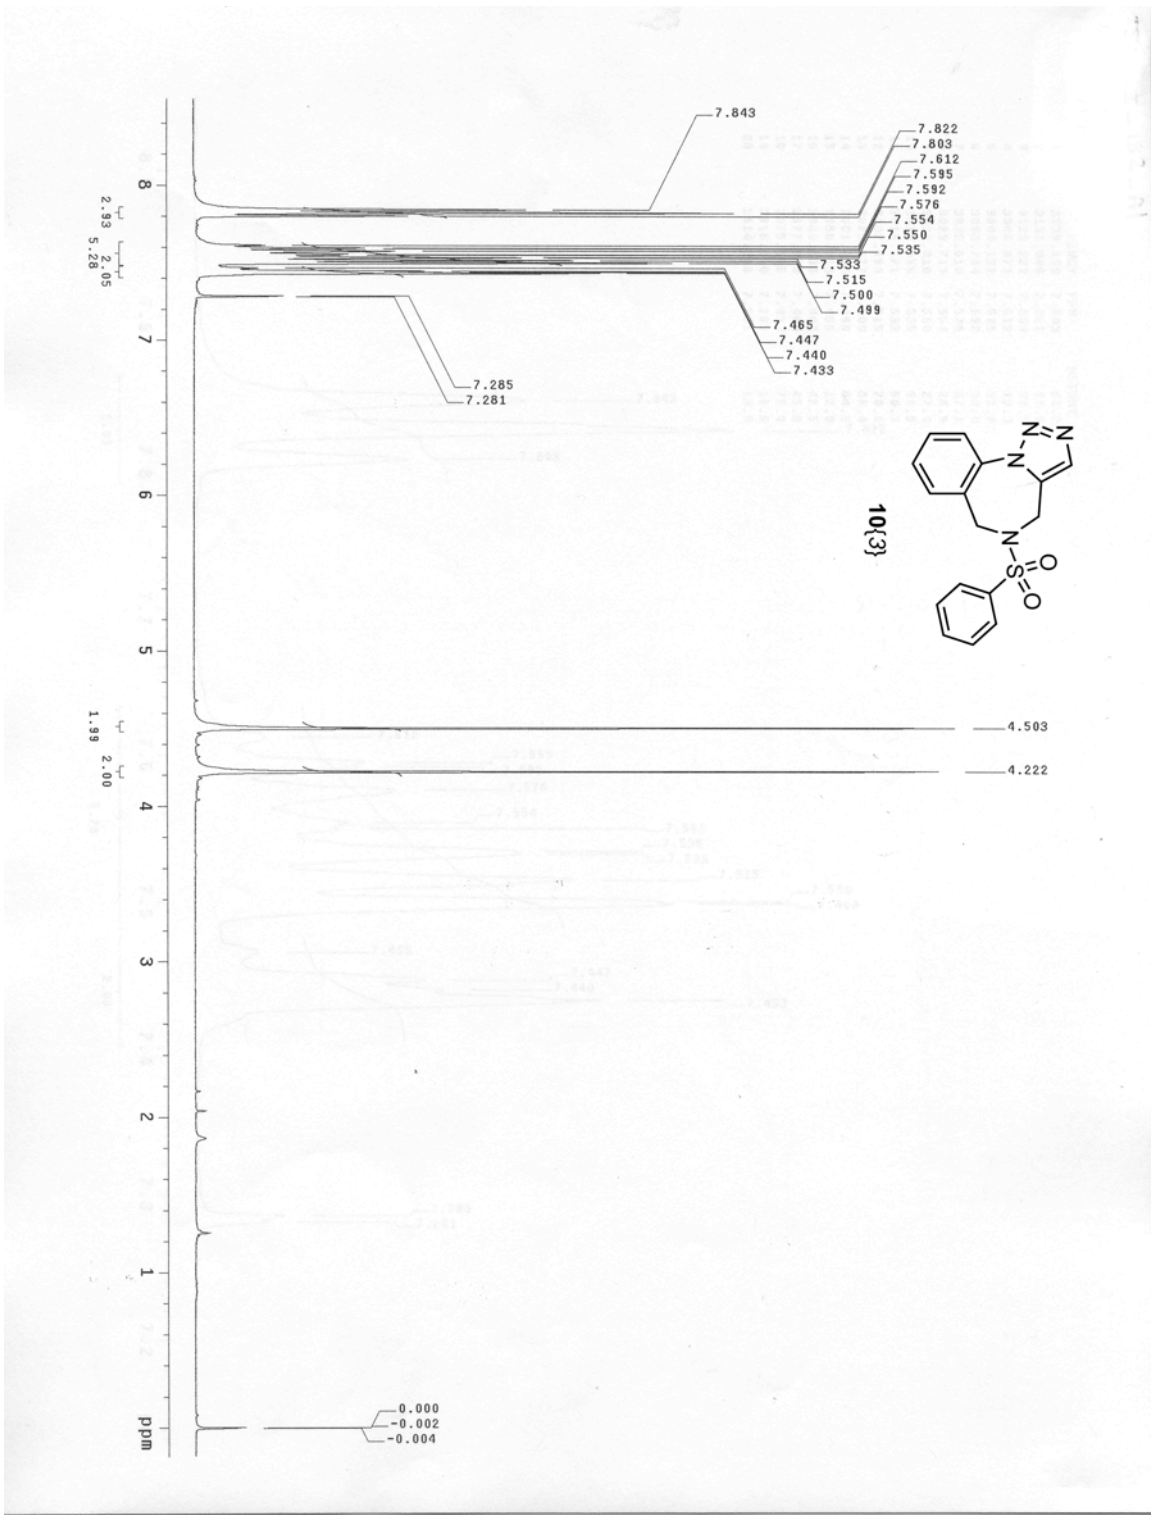





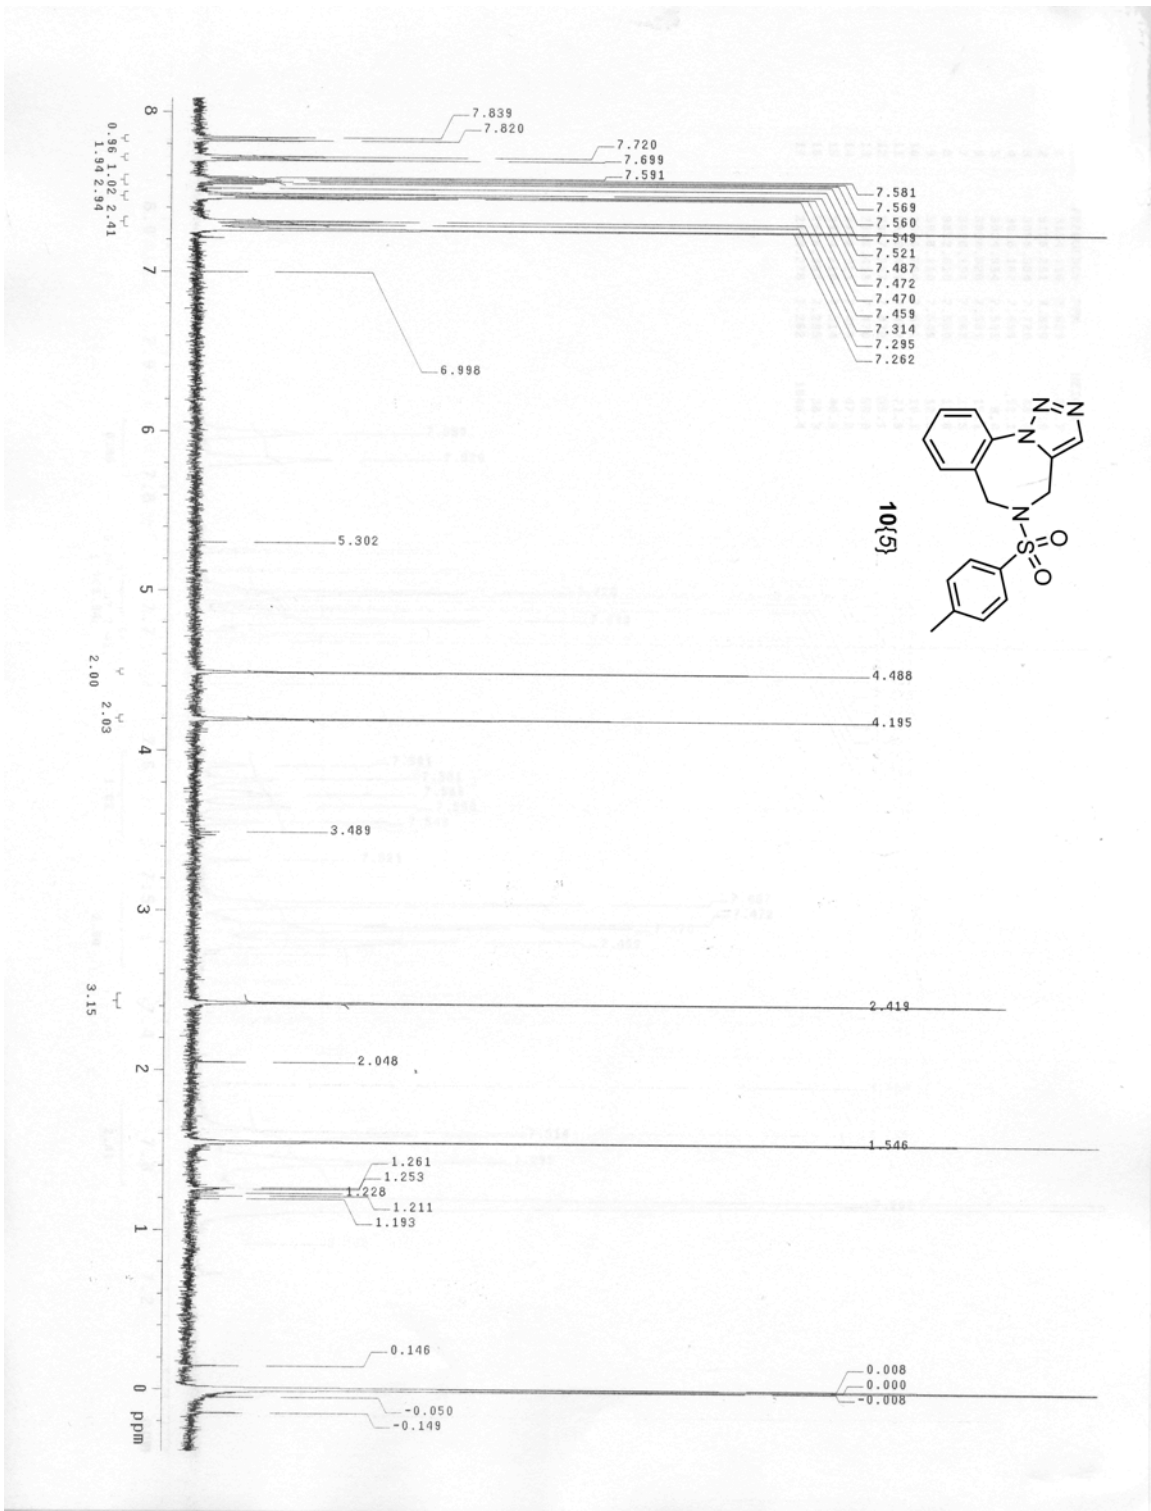

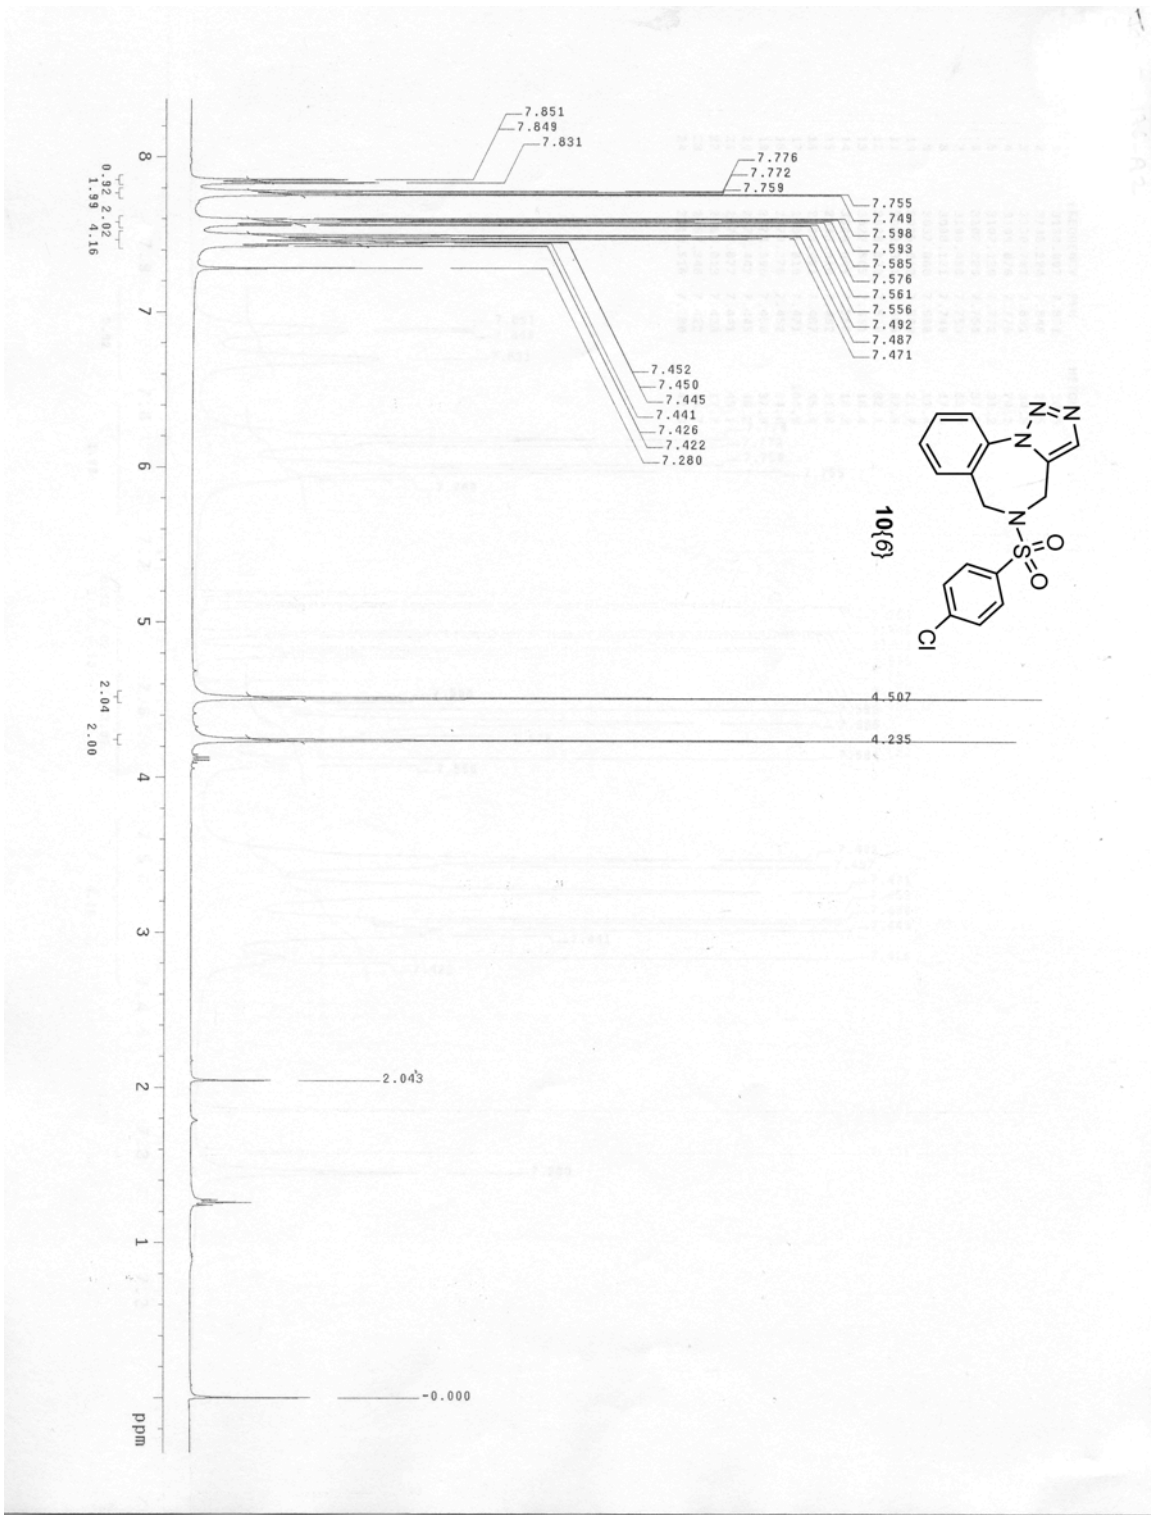

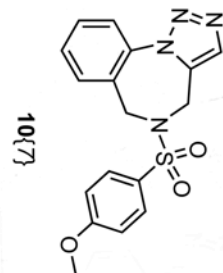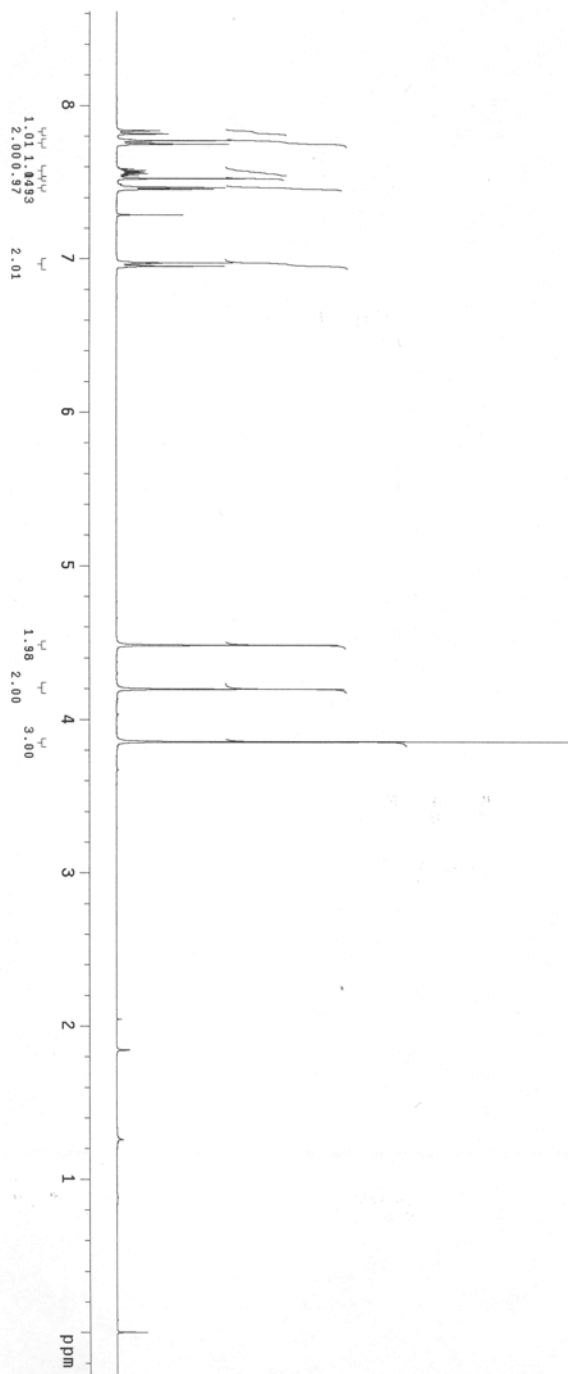

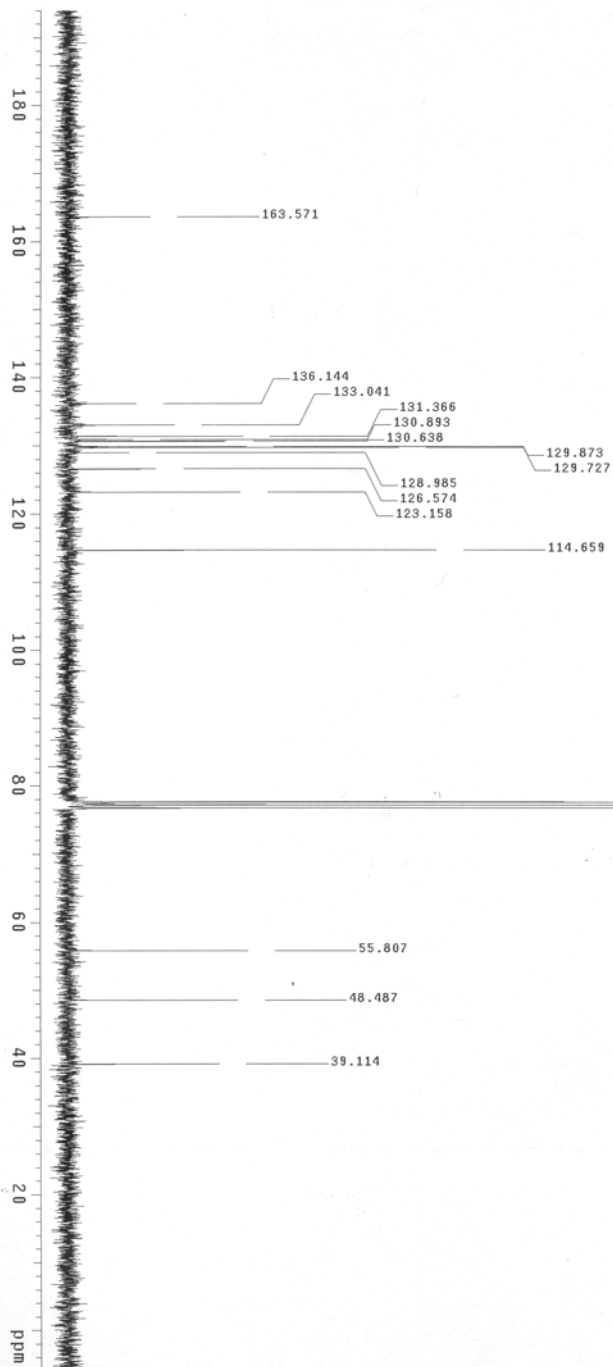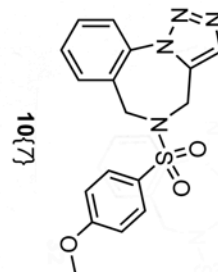

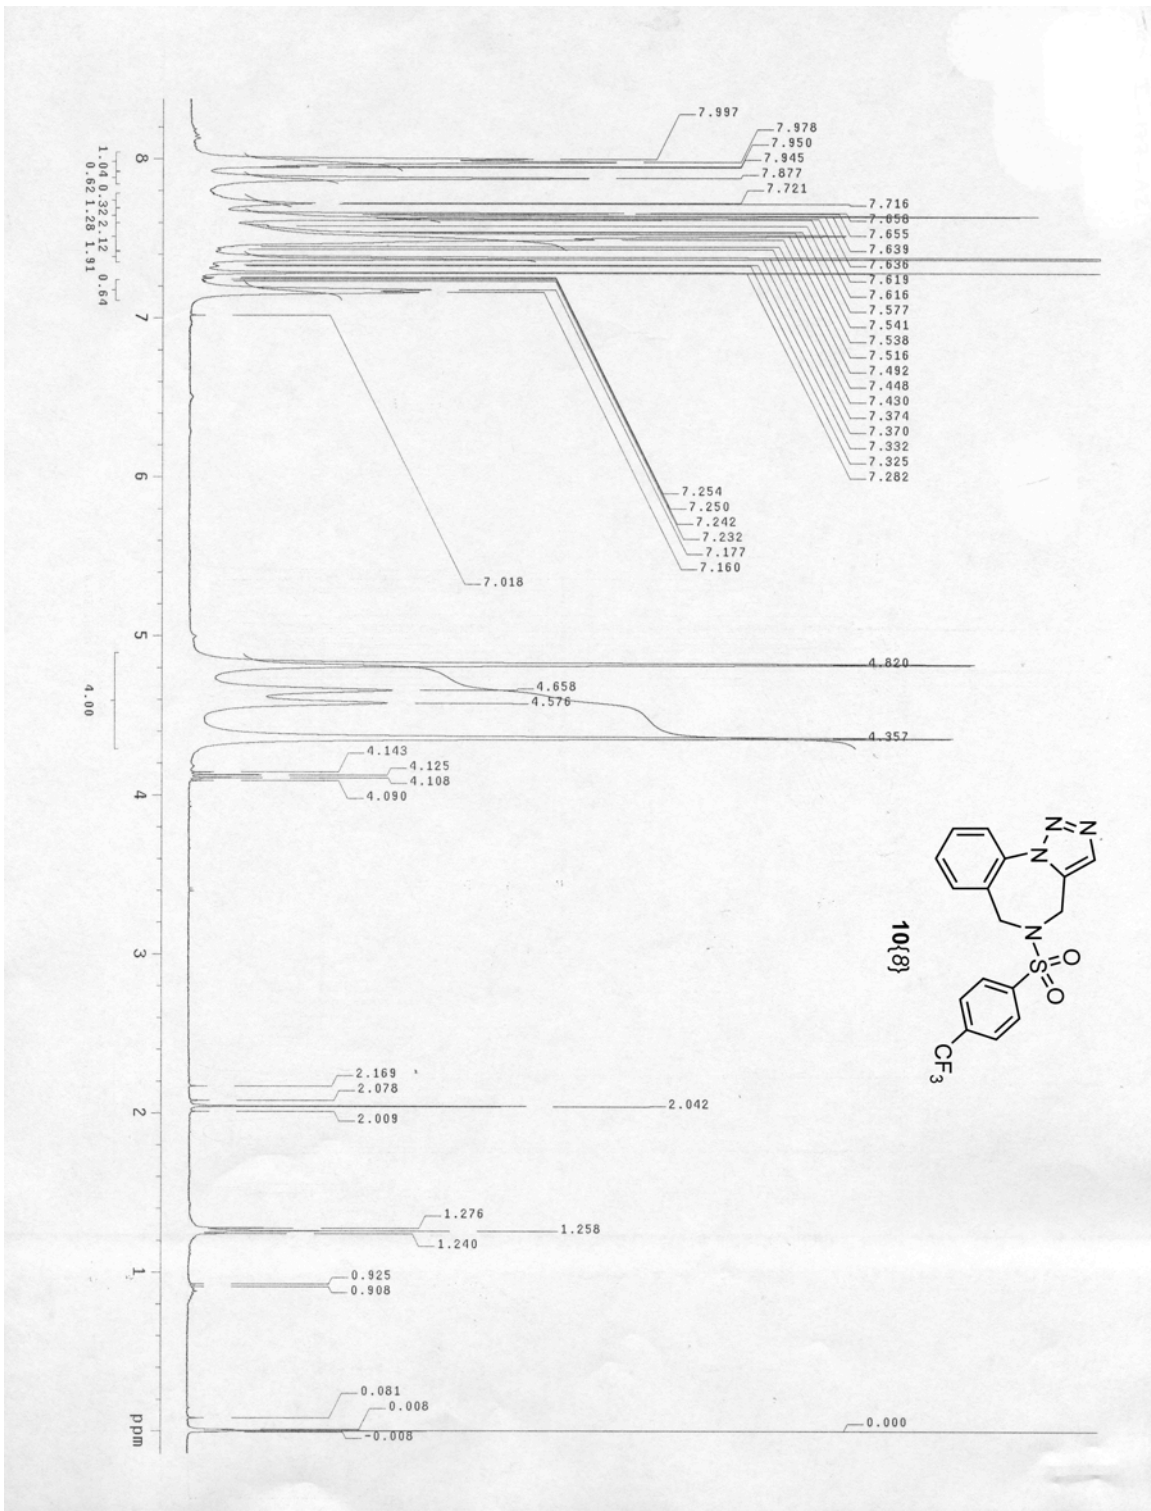

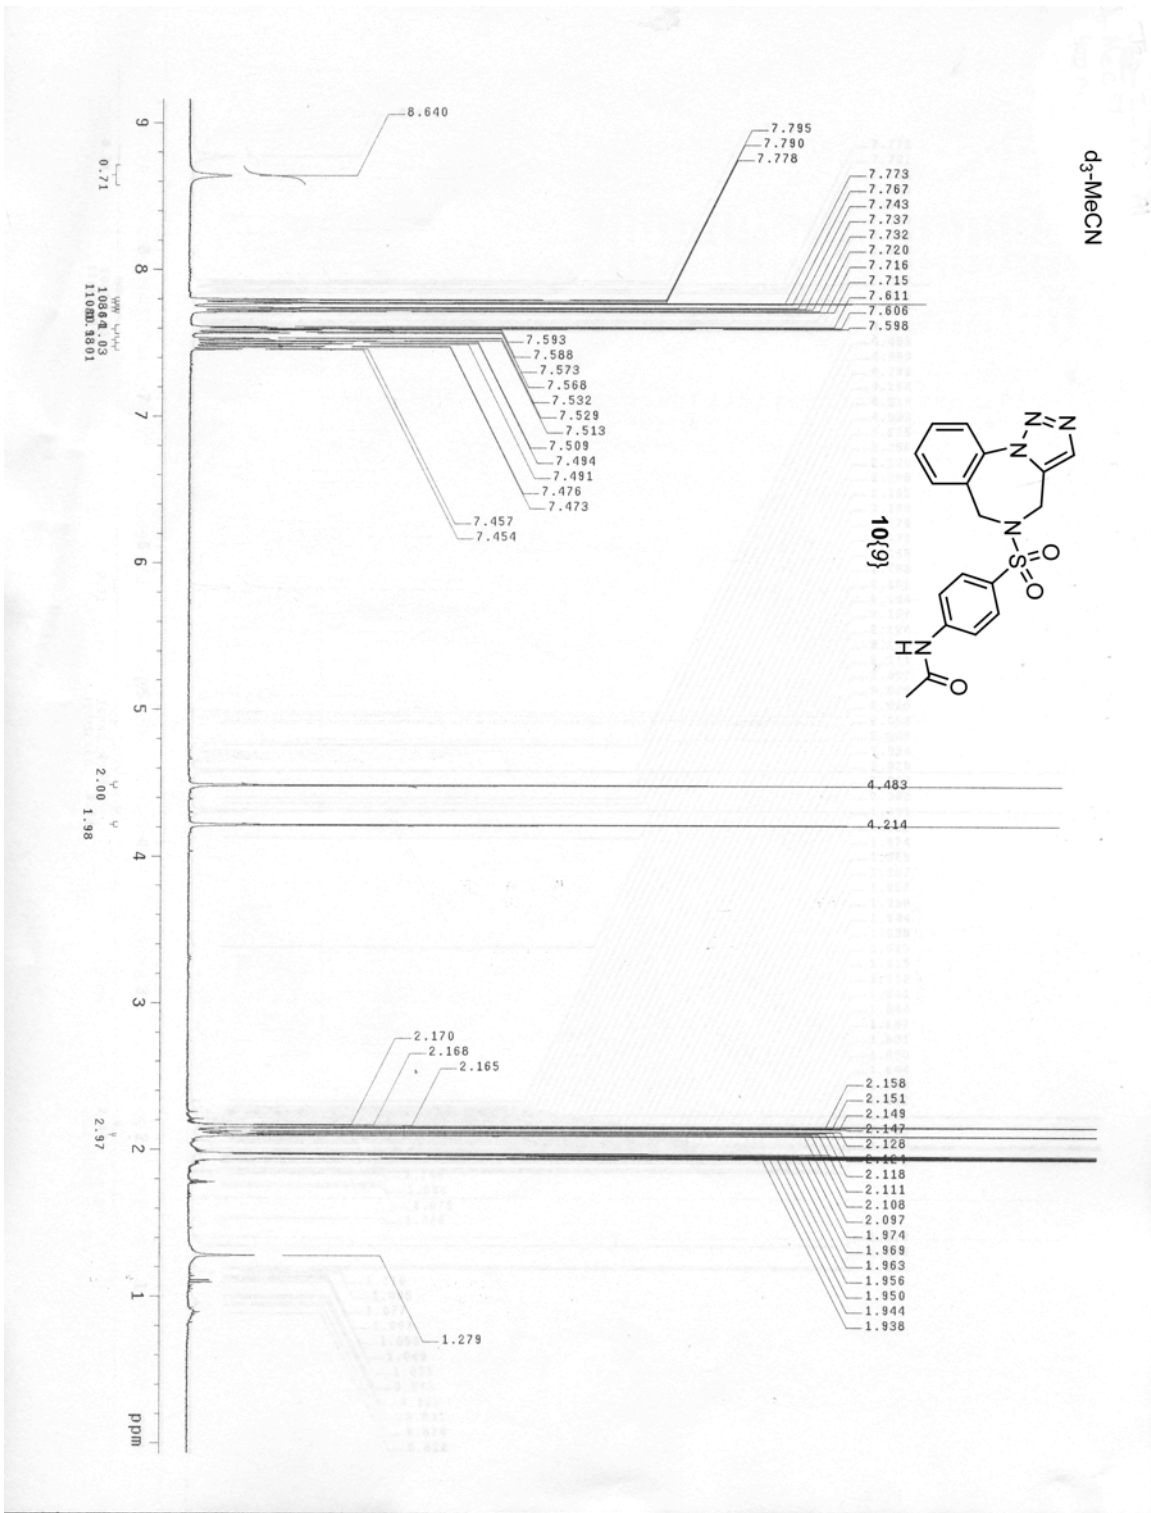

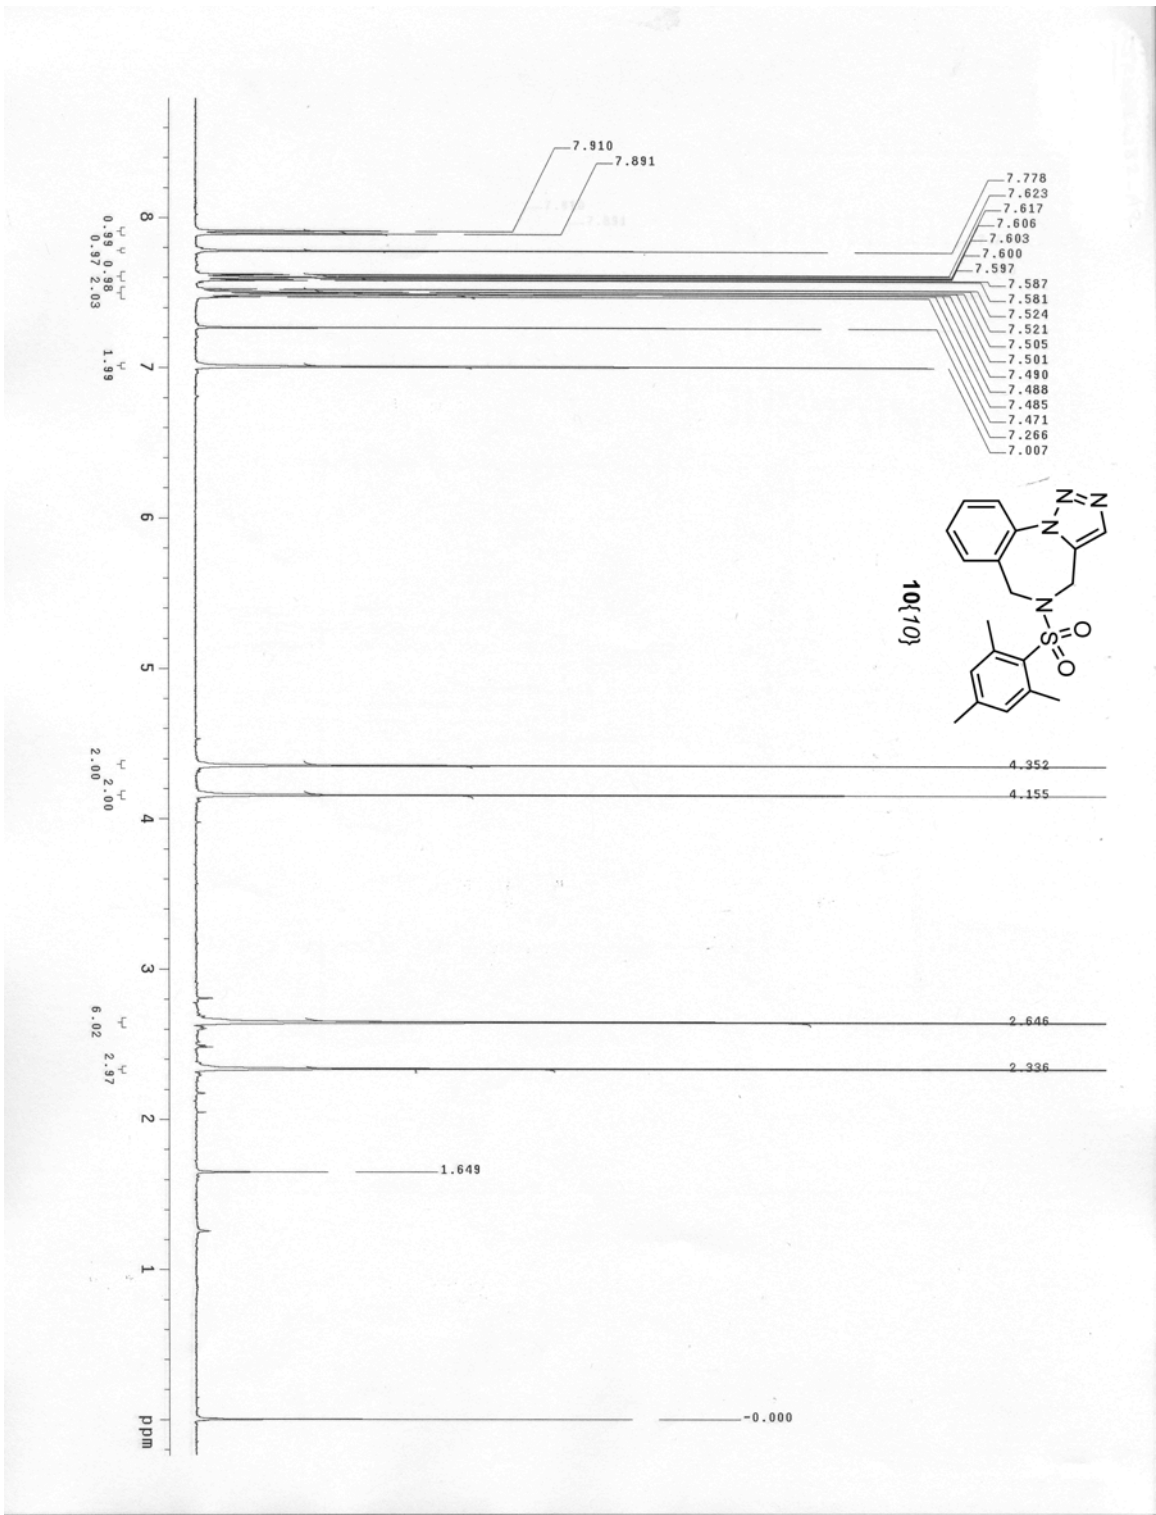

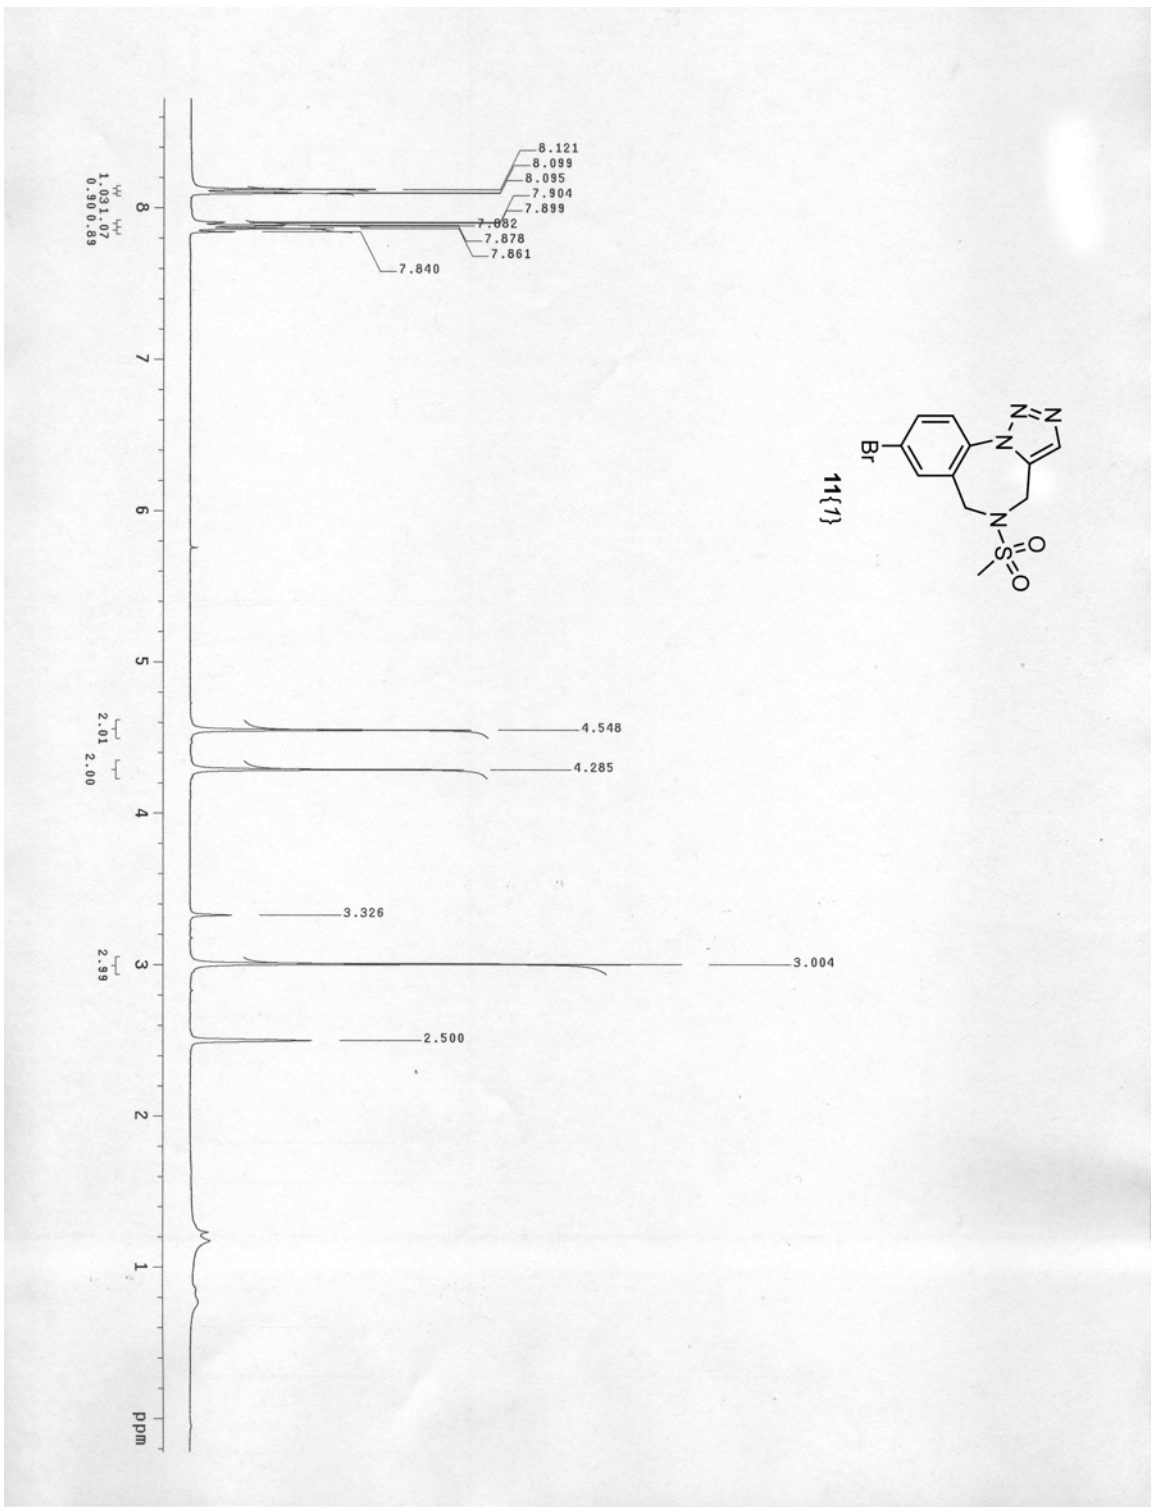



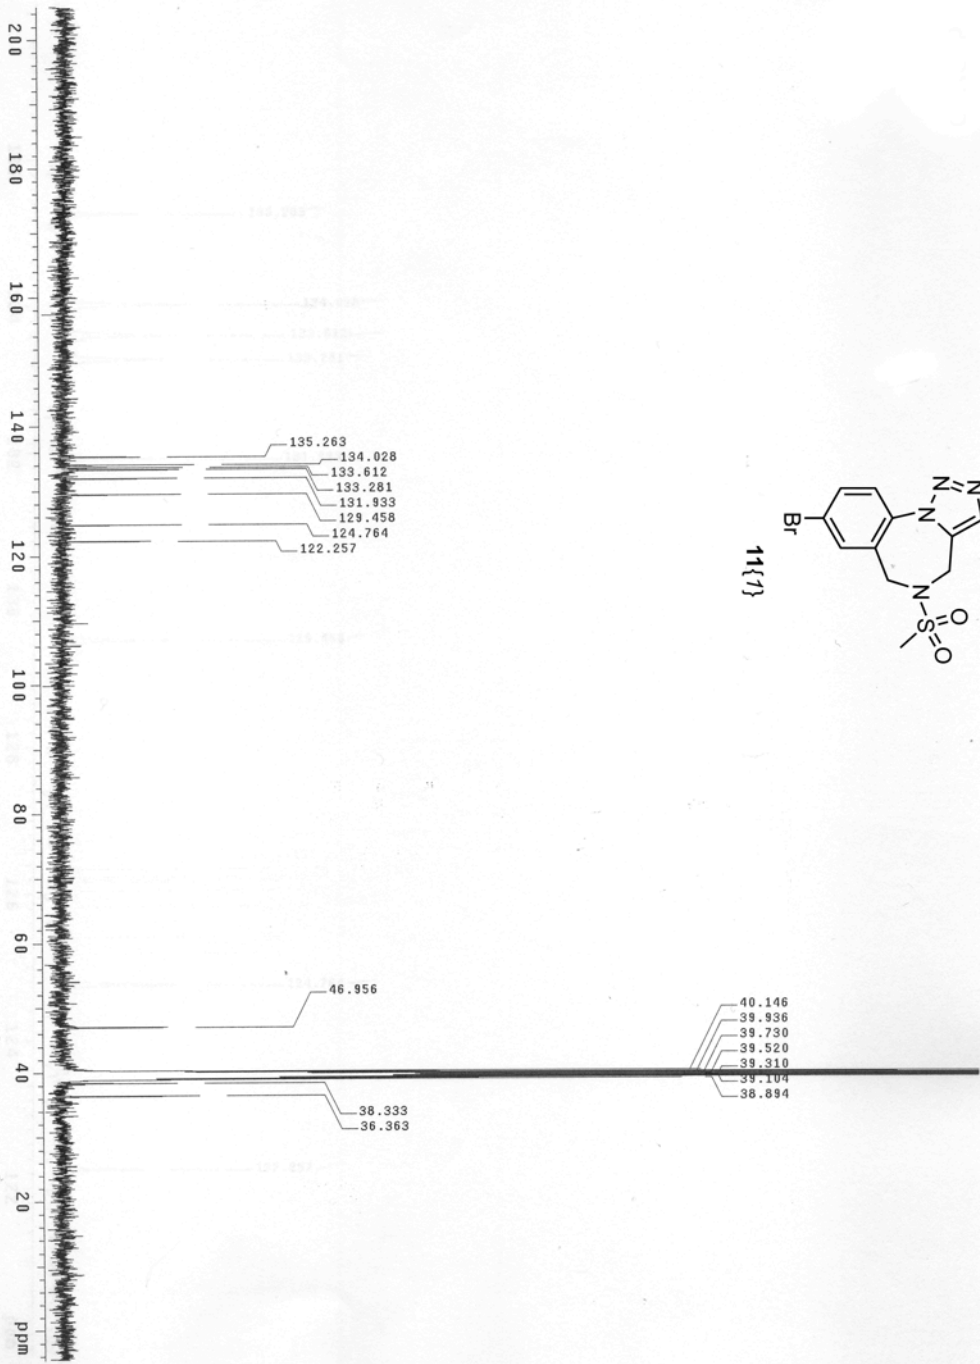

d<sub>3</sub>-MeCN

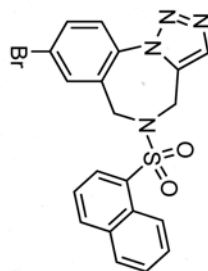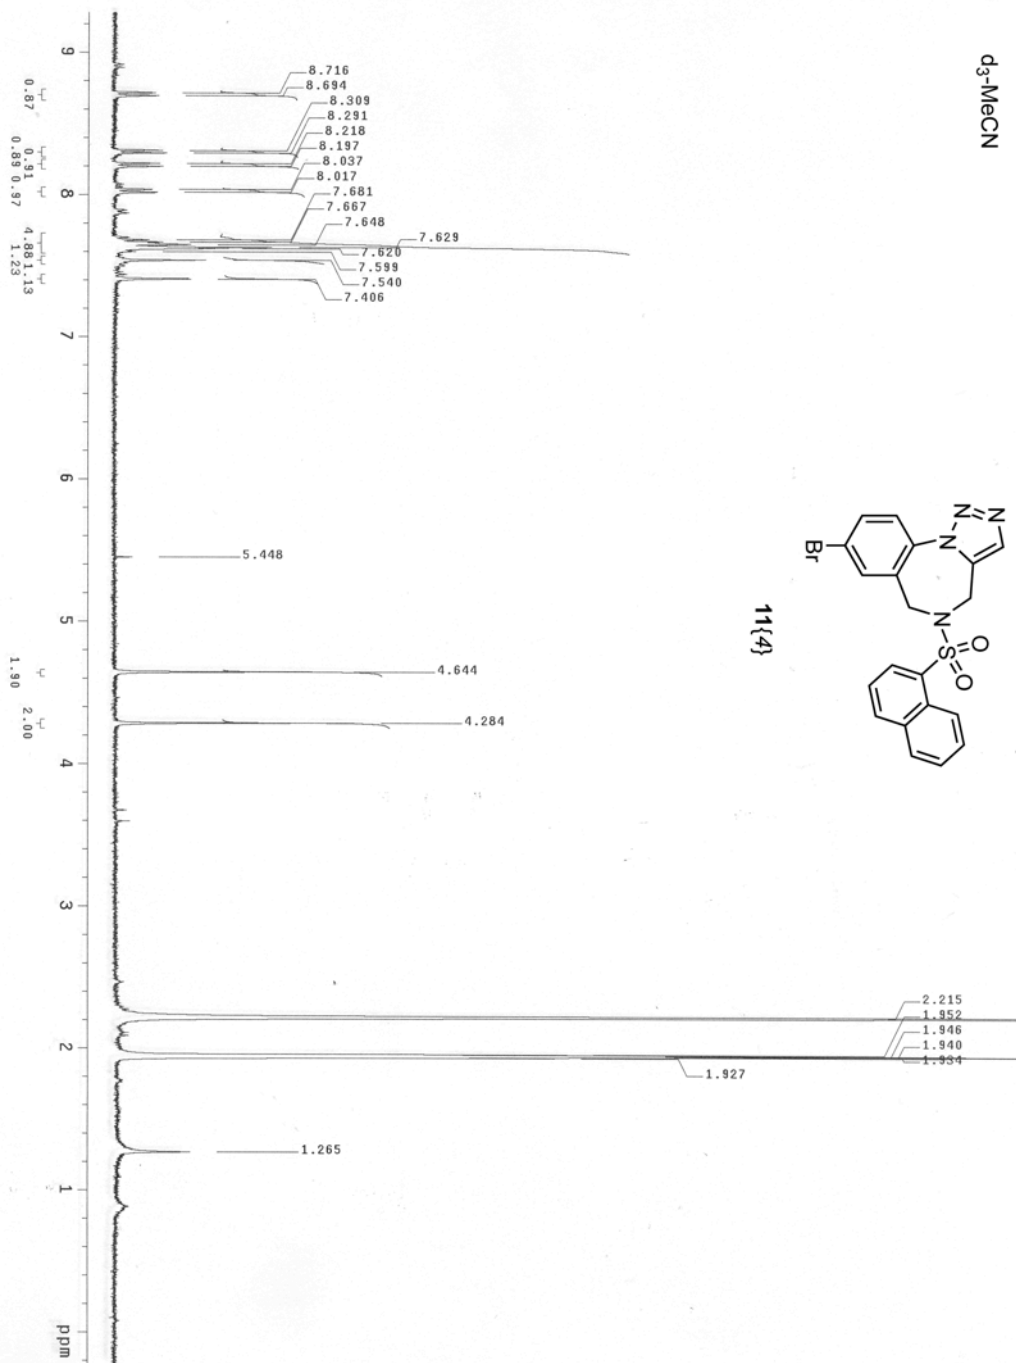

d<sub>3</sub>-MeCN

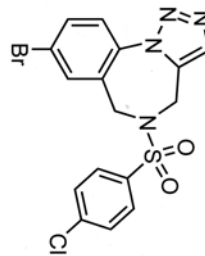

11(6)

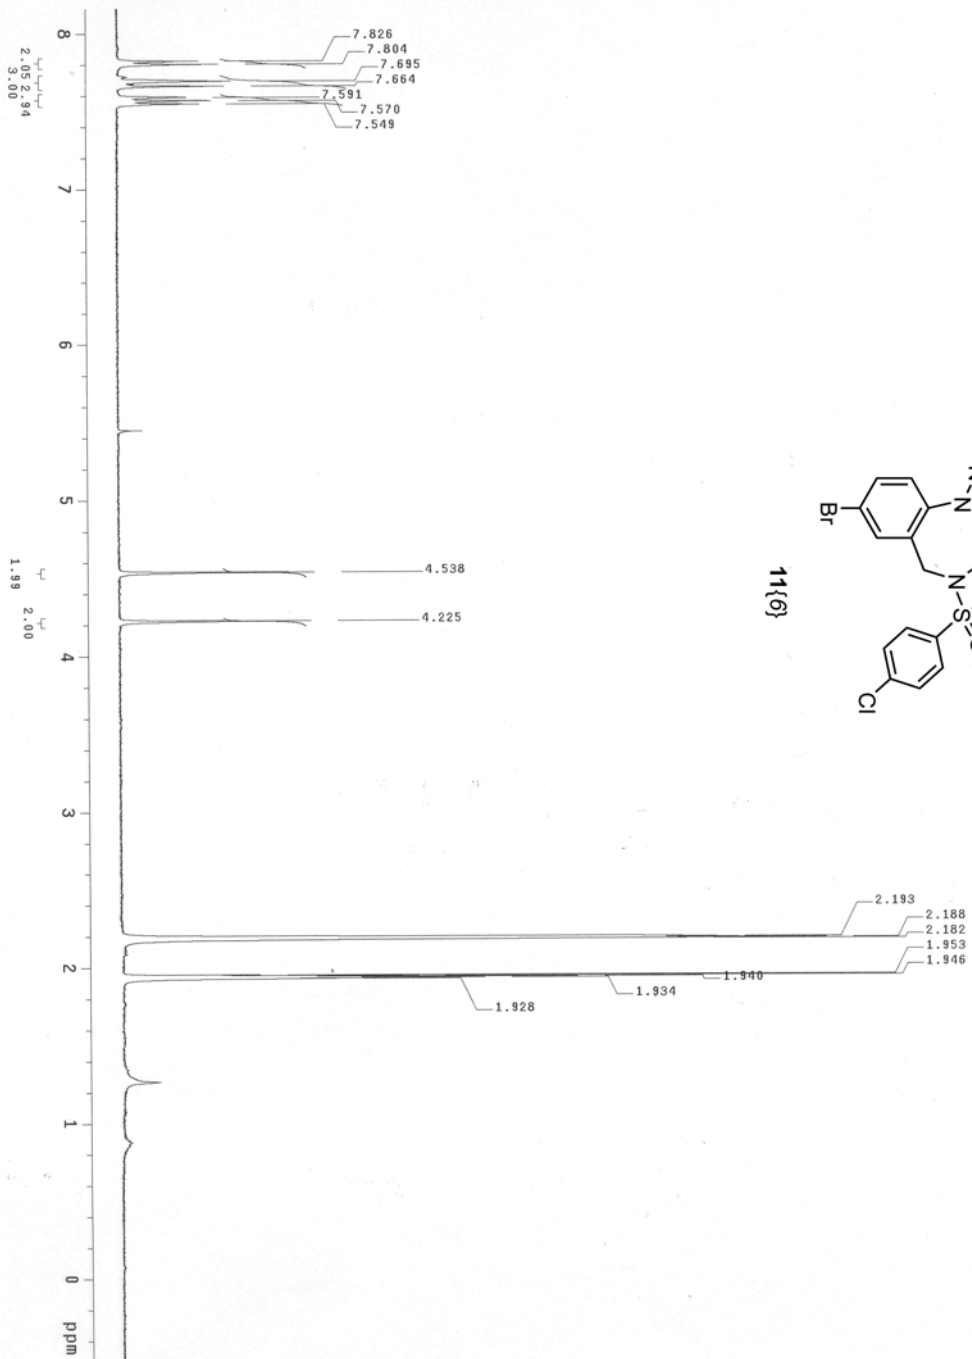

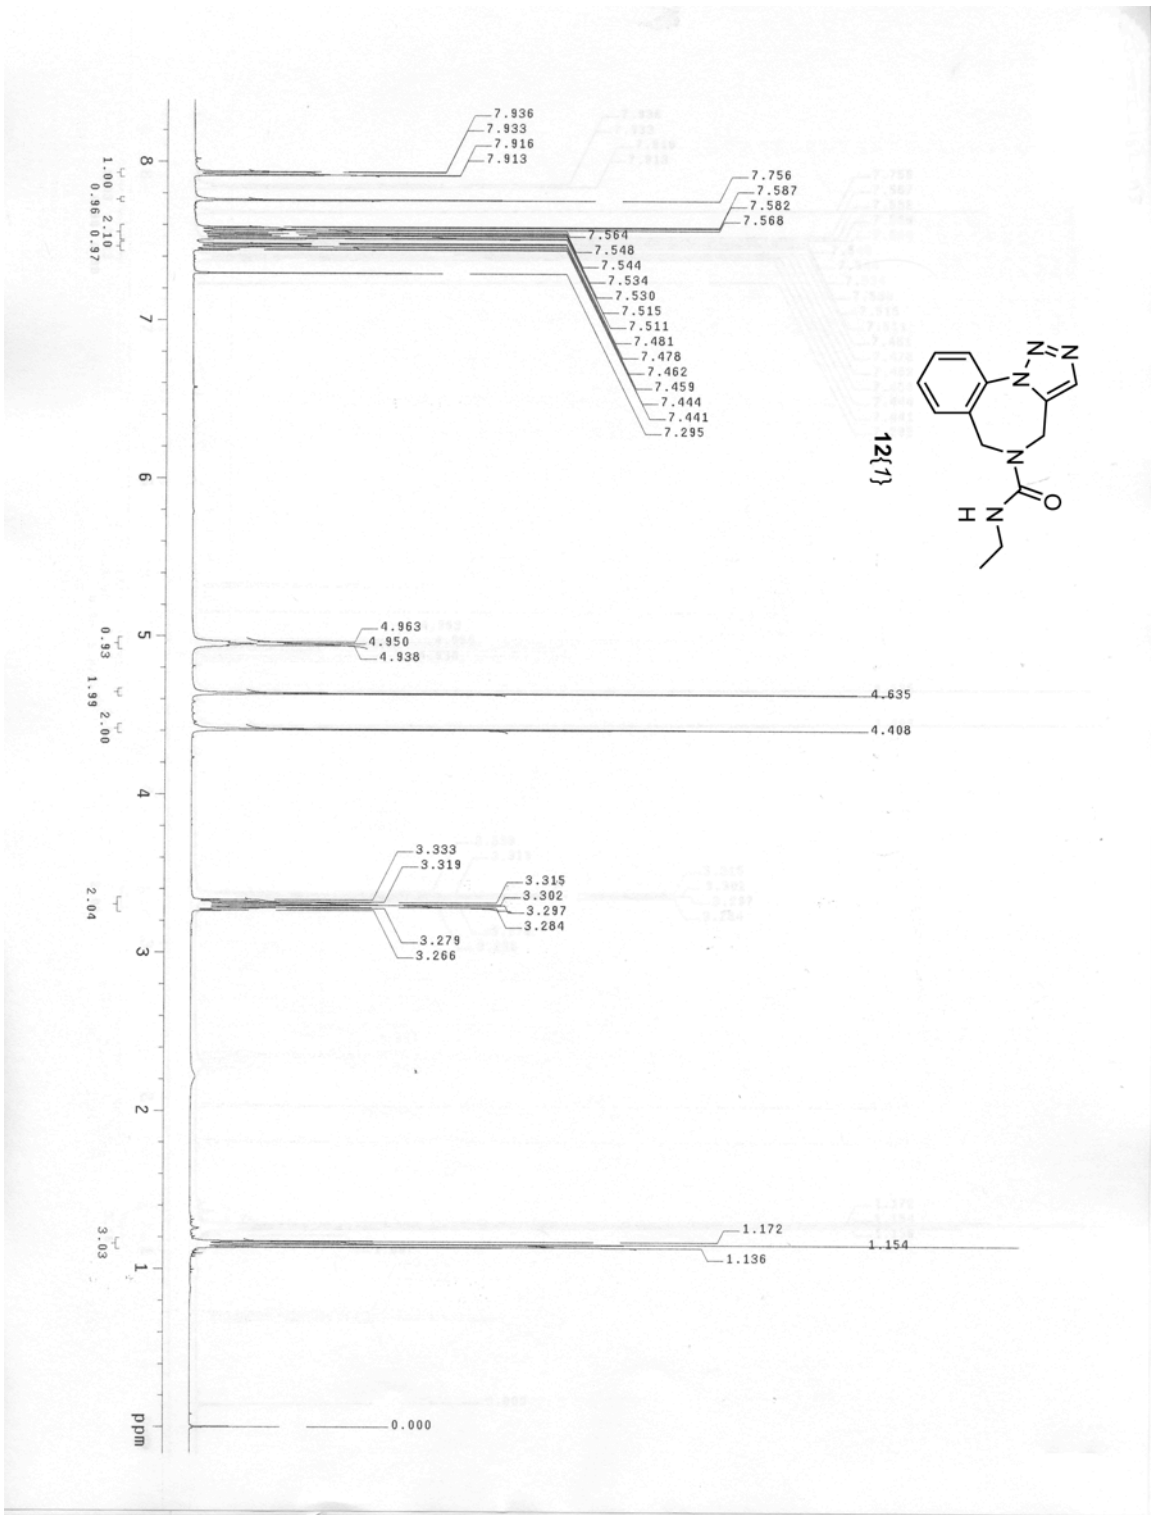

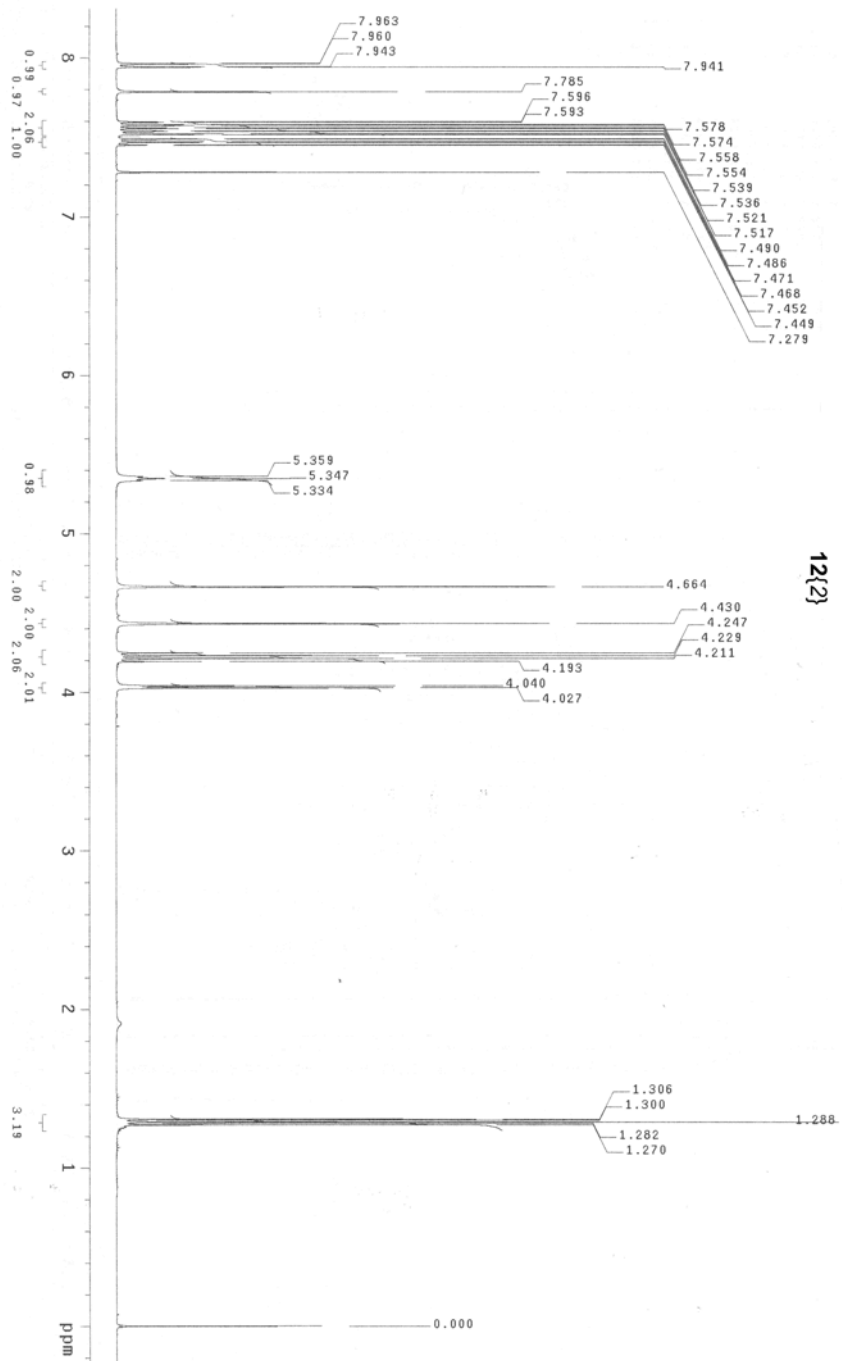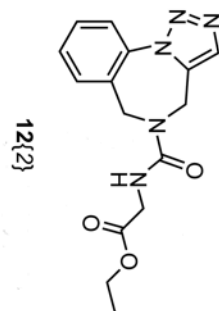

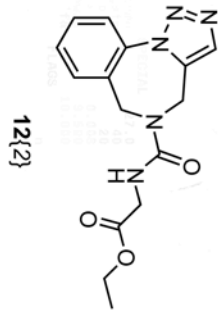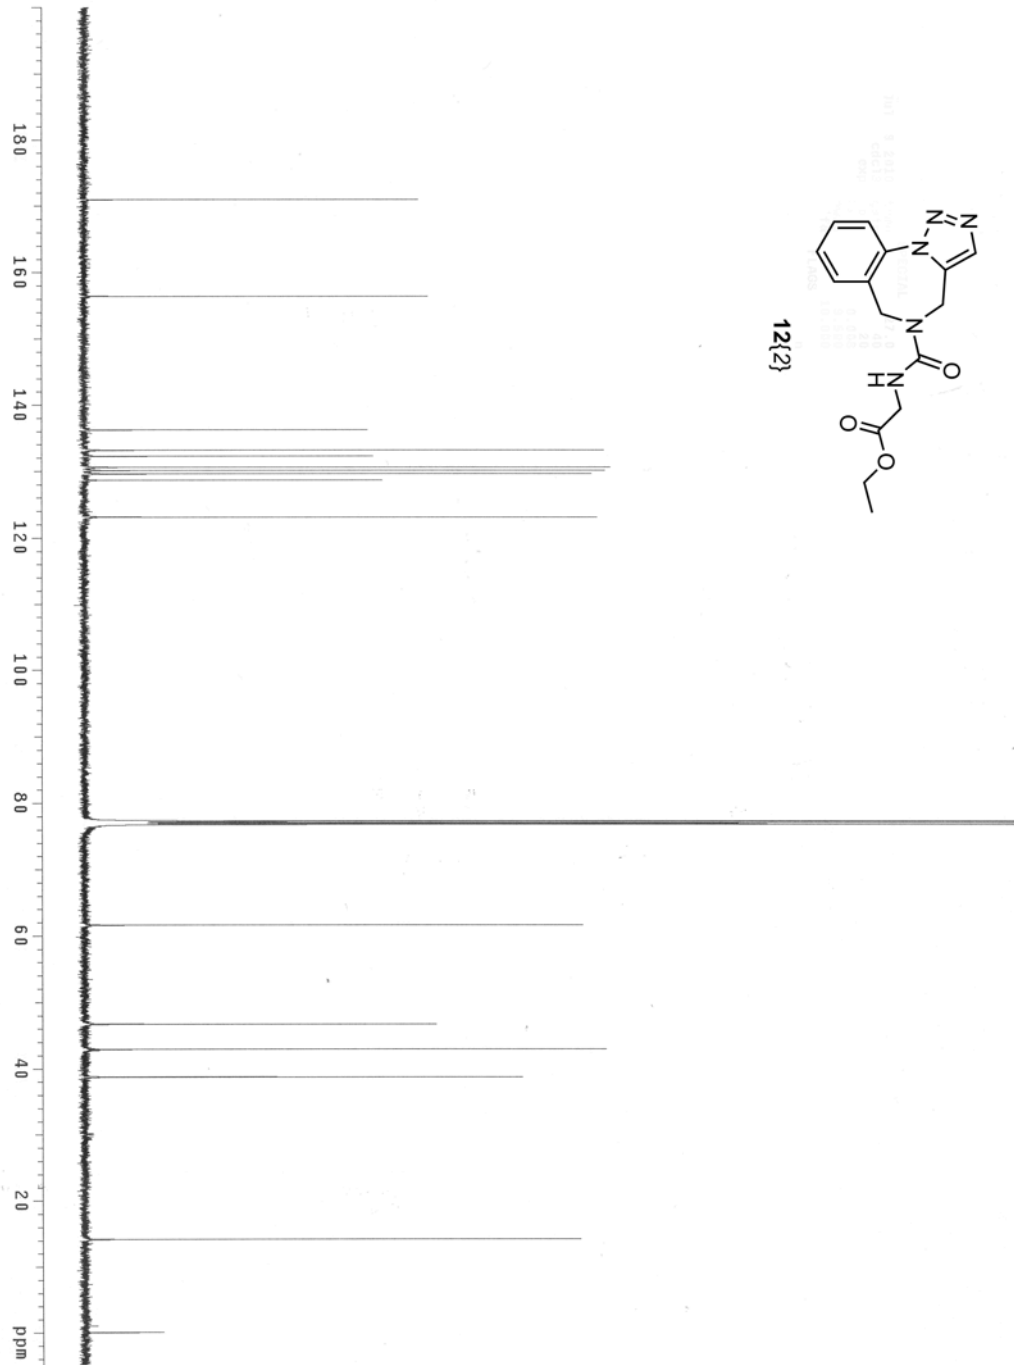

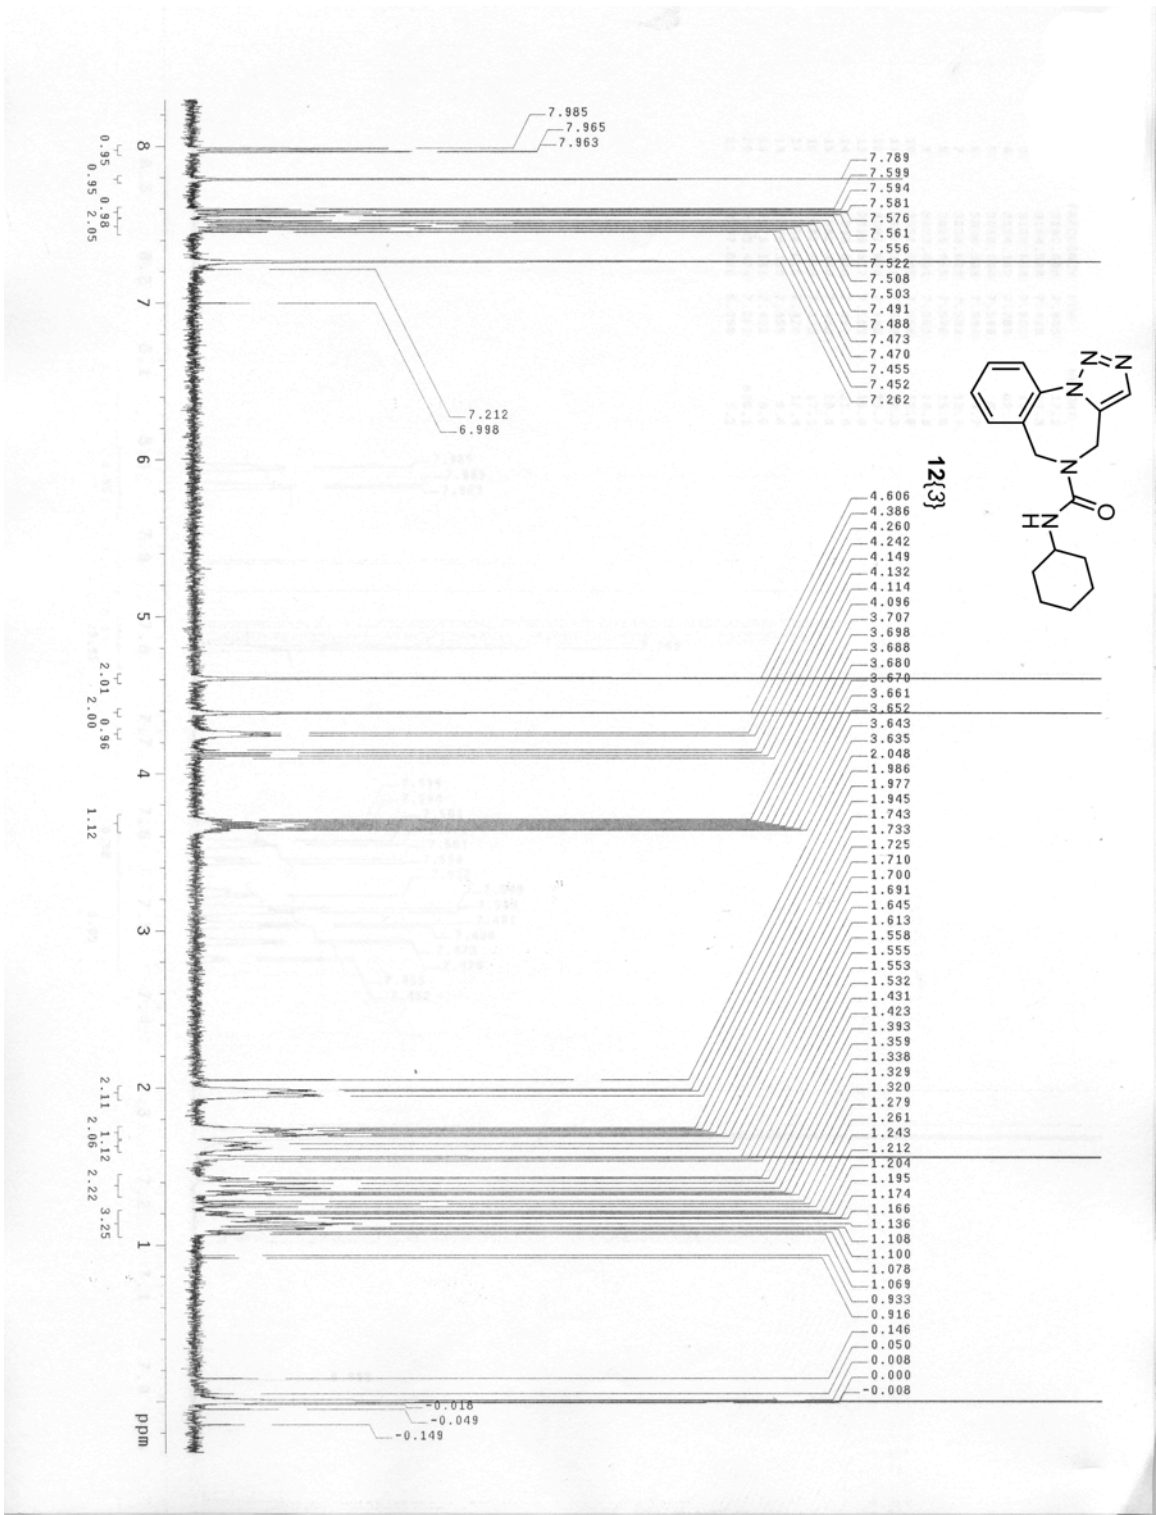

9  
8  
7  
6  
5  
4  
3  
2  
1  
0 ppm

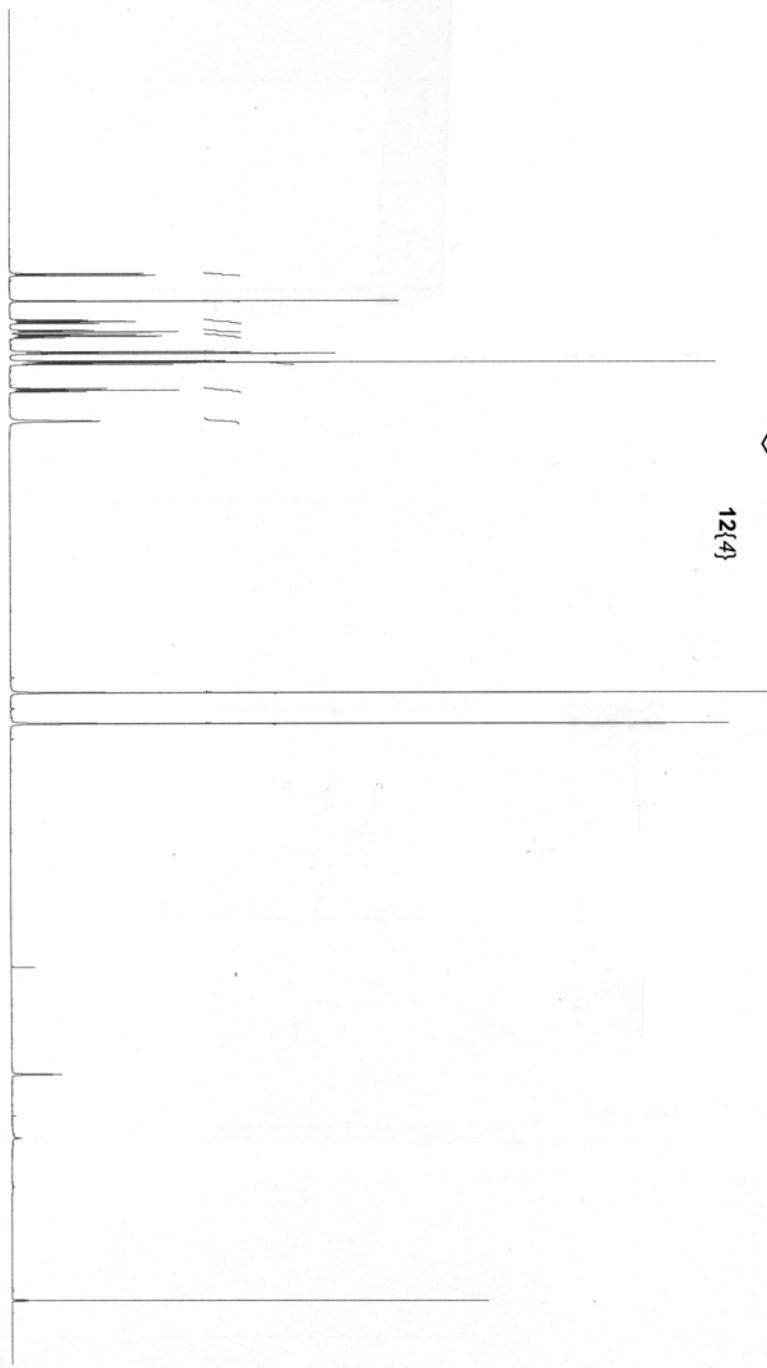

12(f)

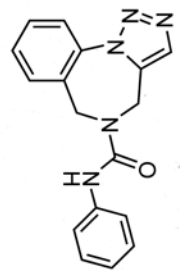



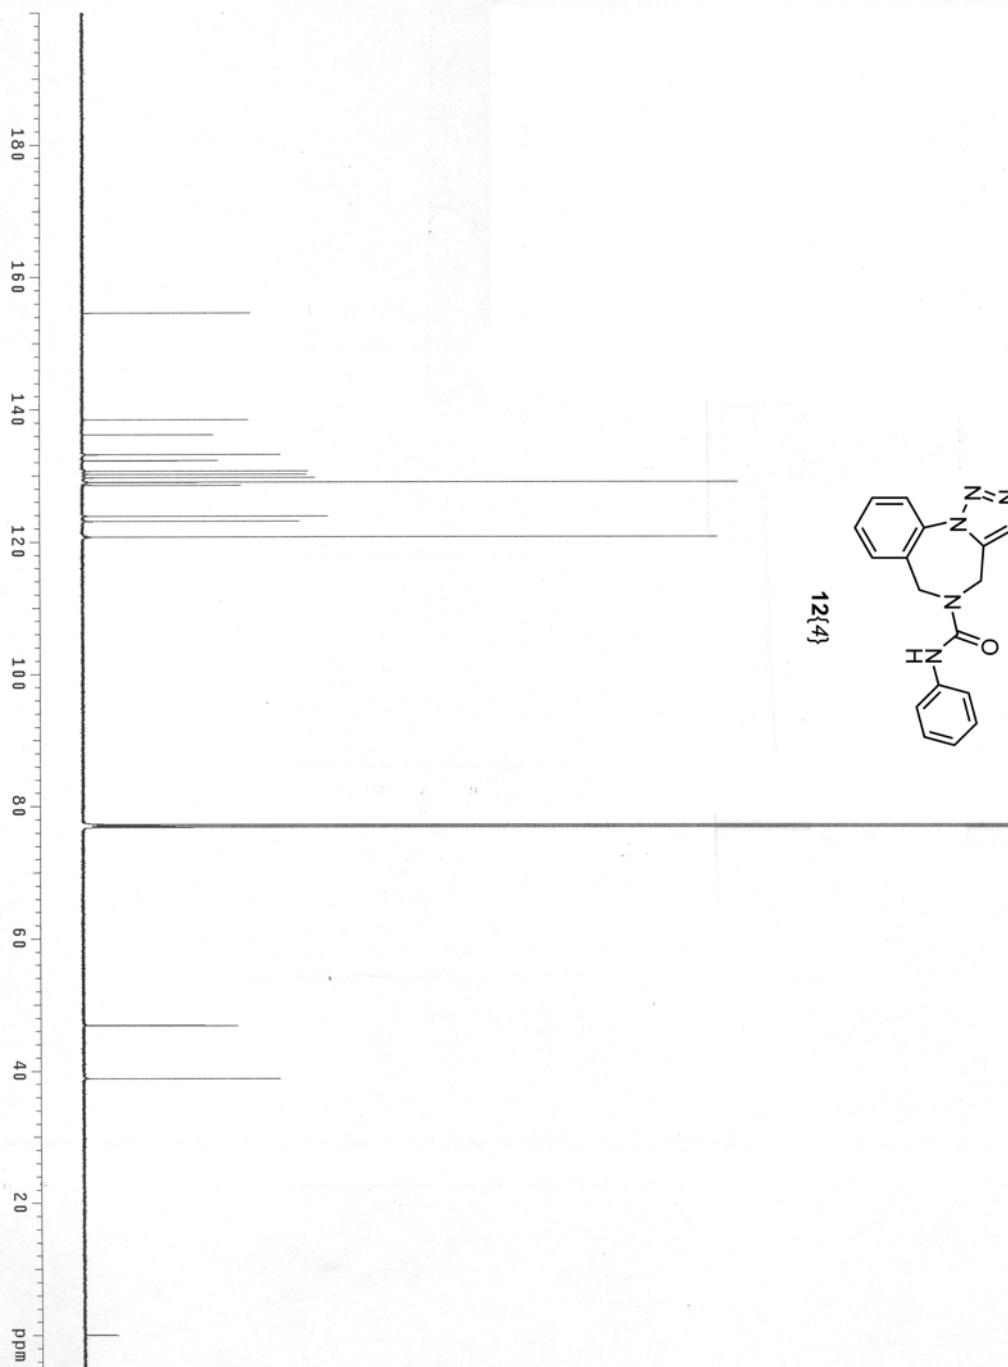

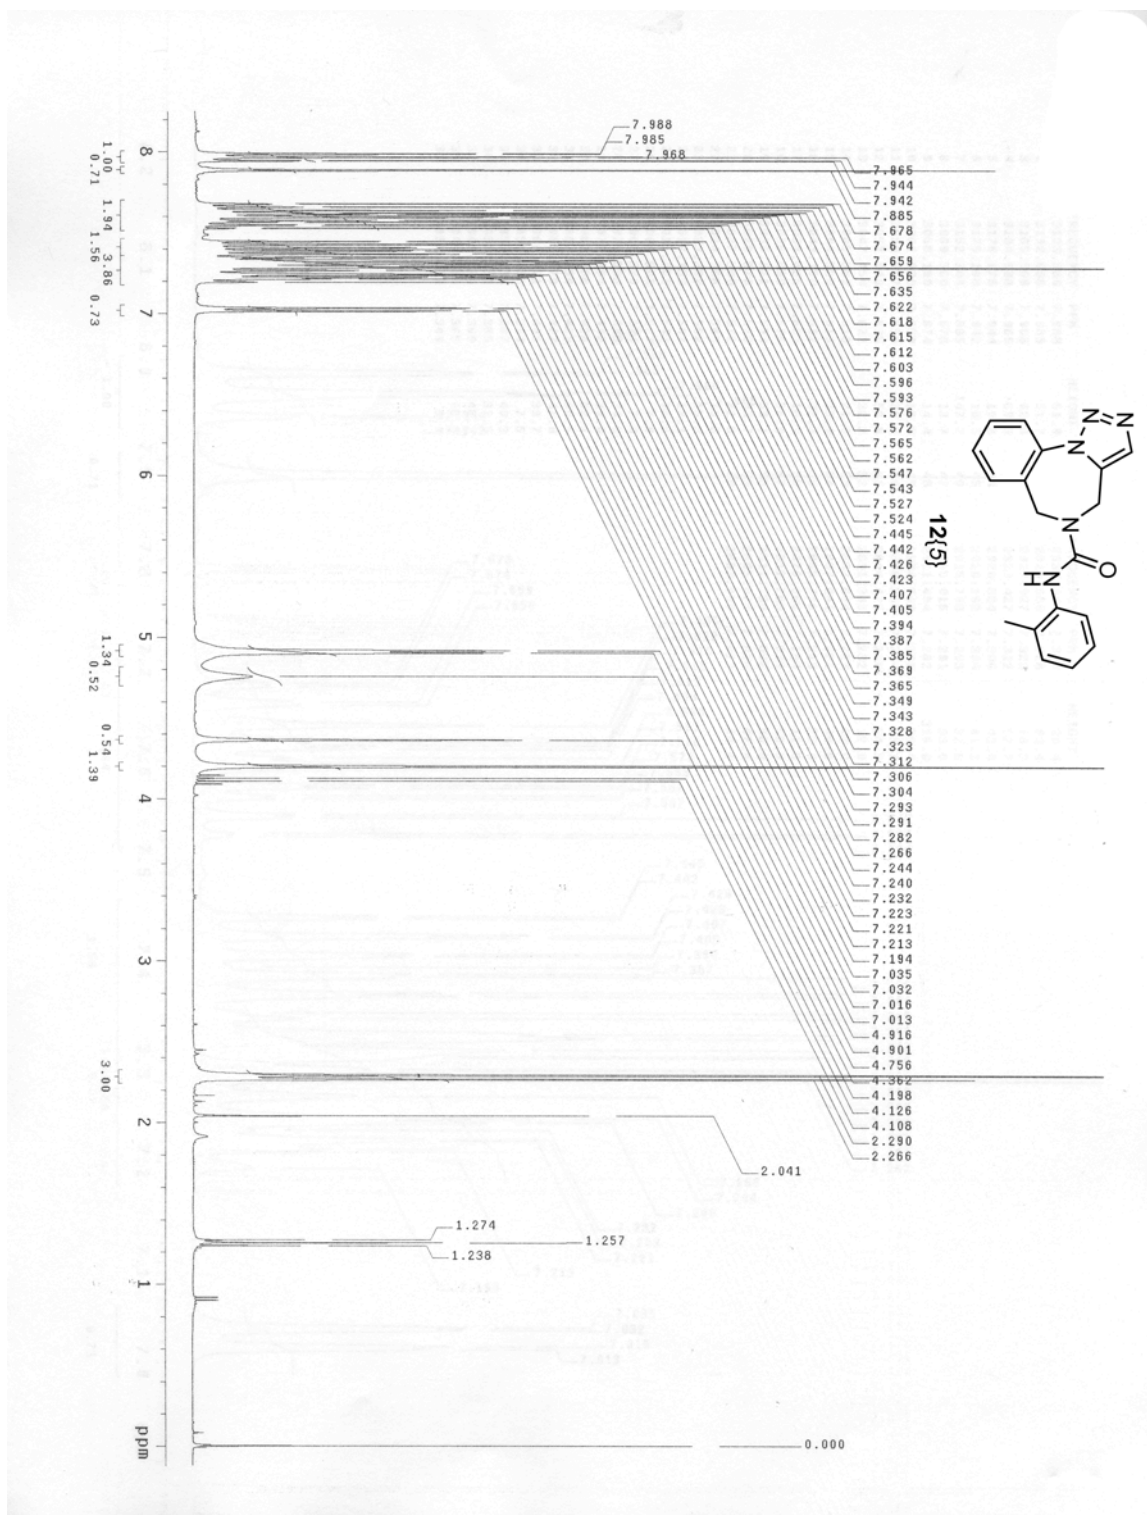

d<sub>4</sub>-MeOD

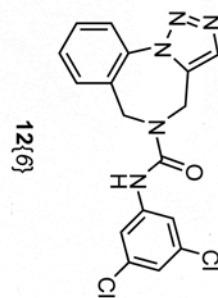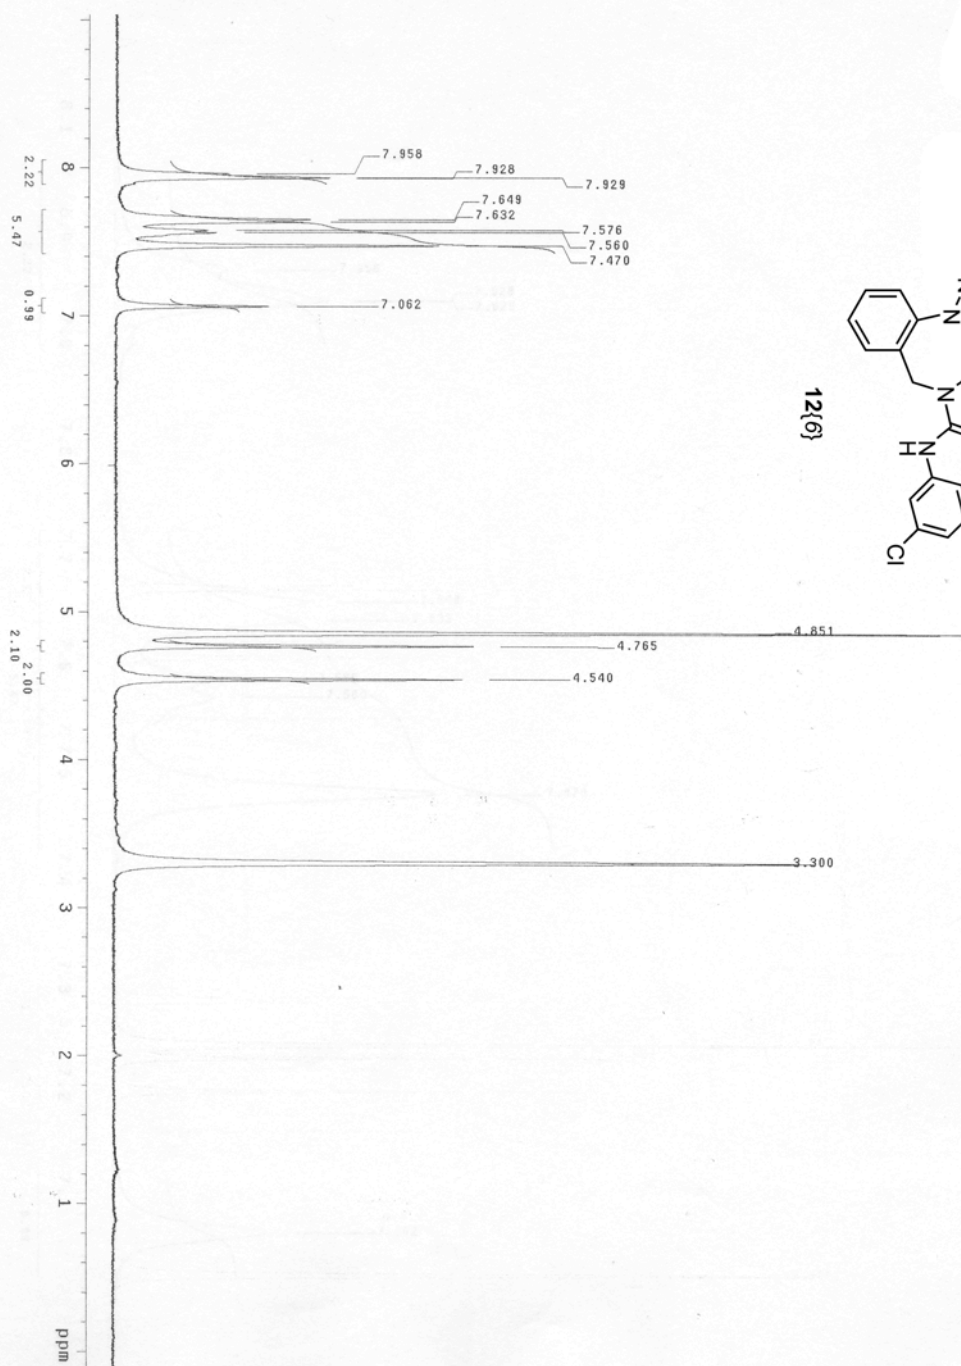

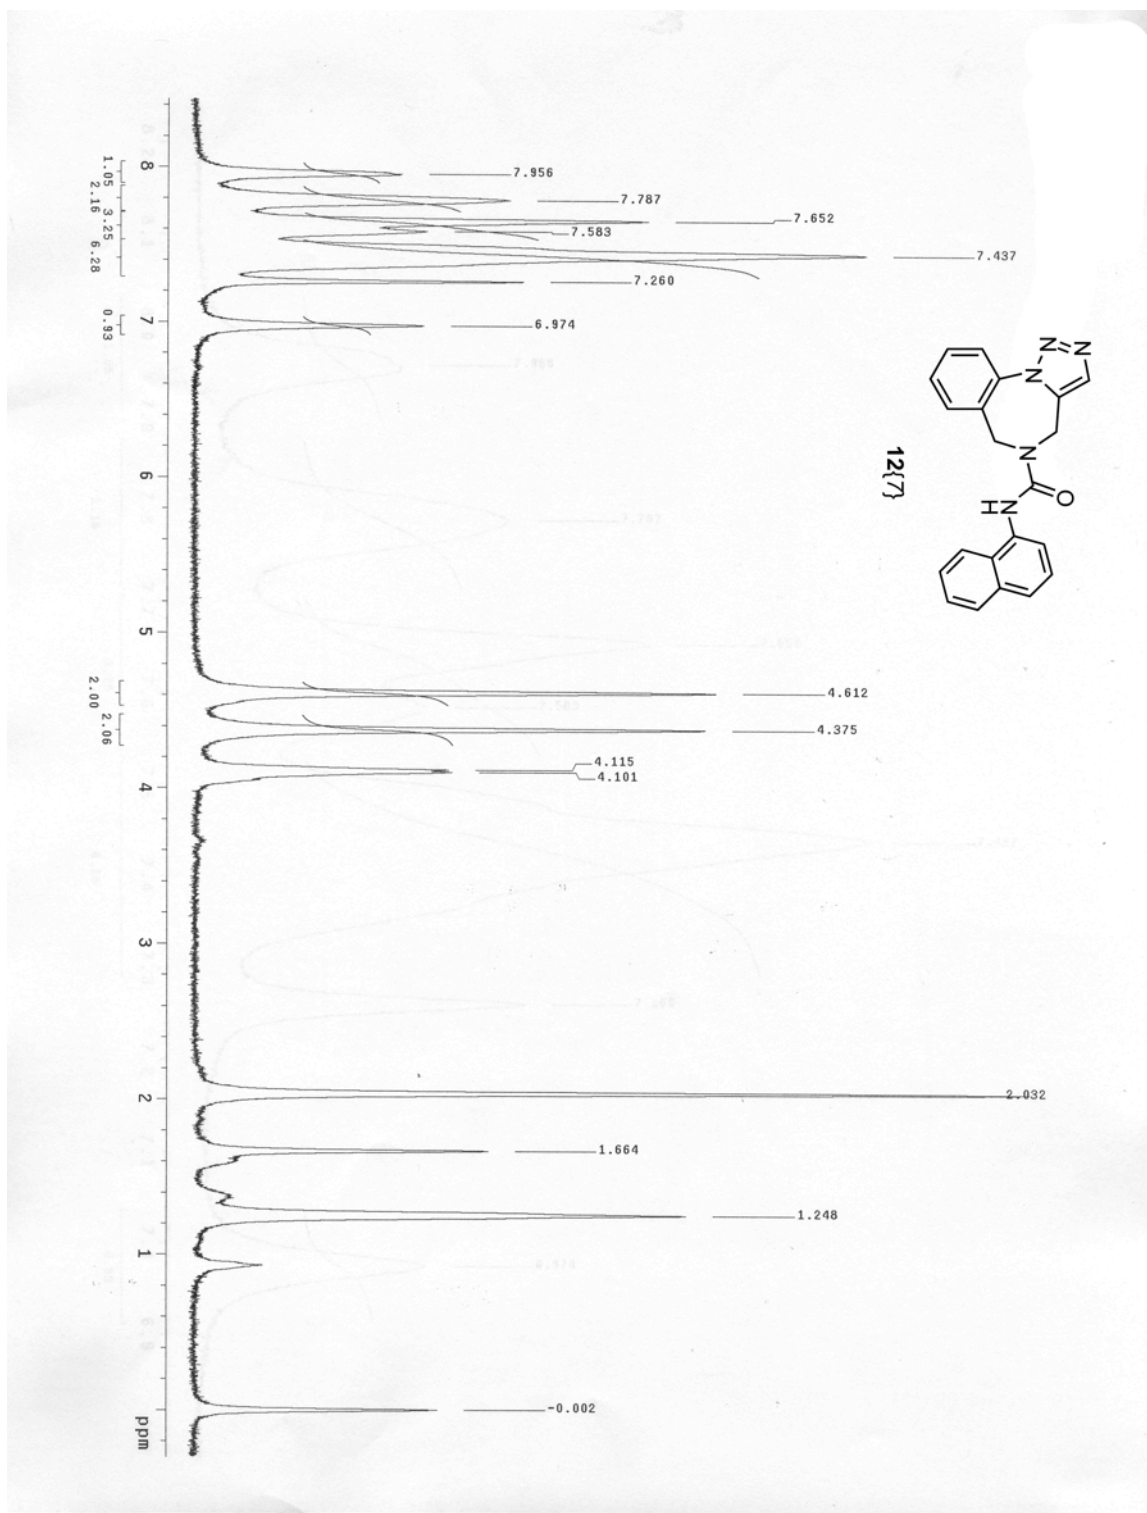

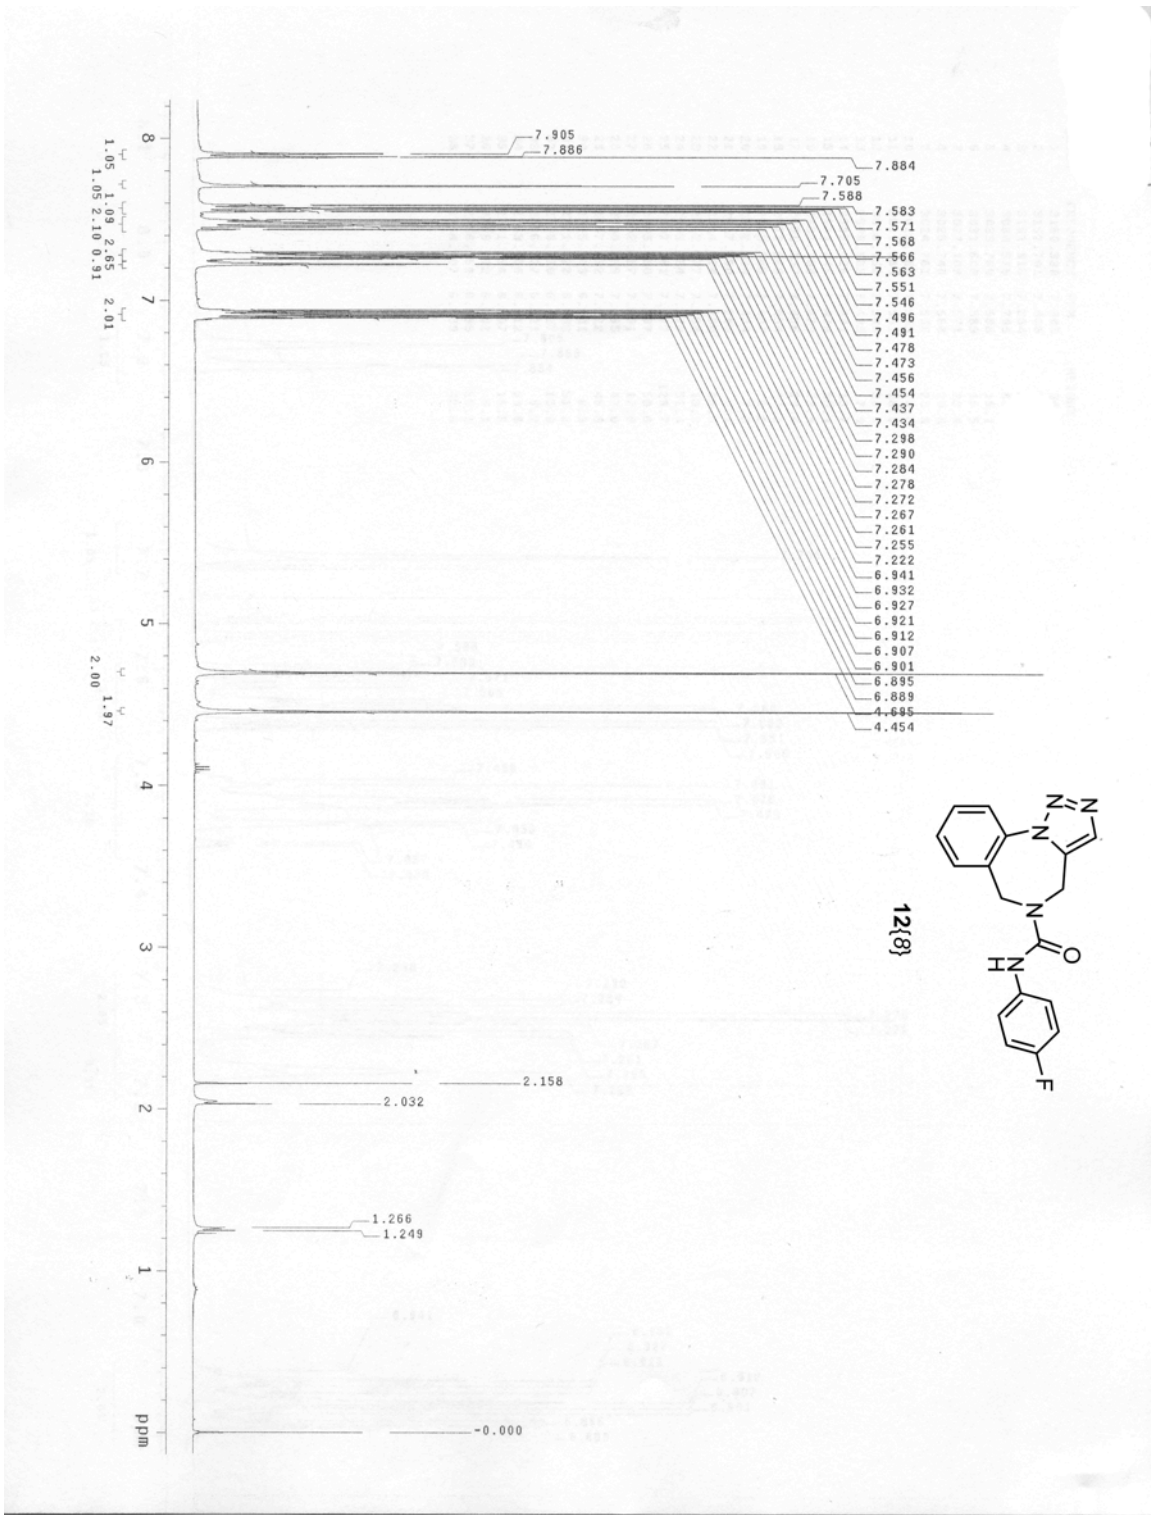

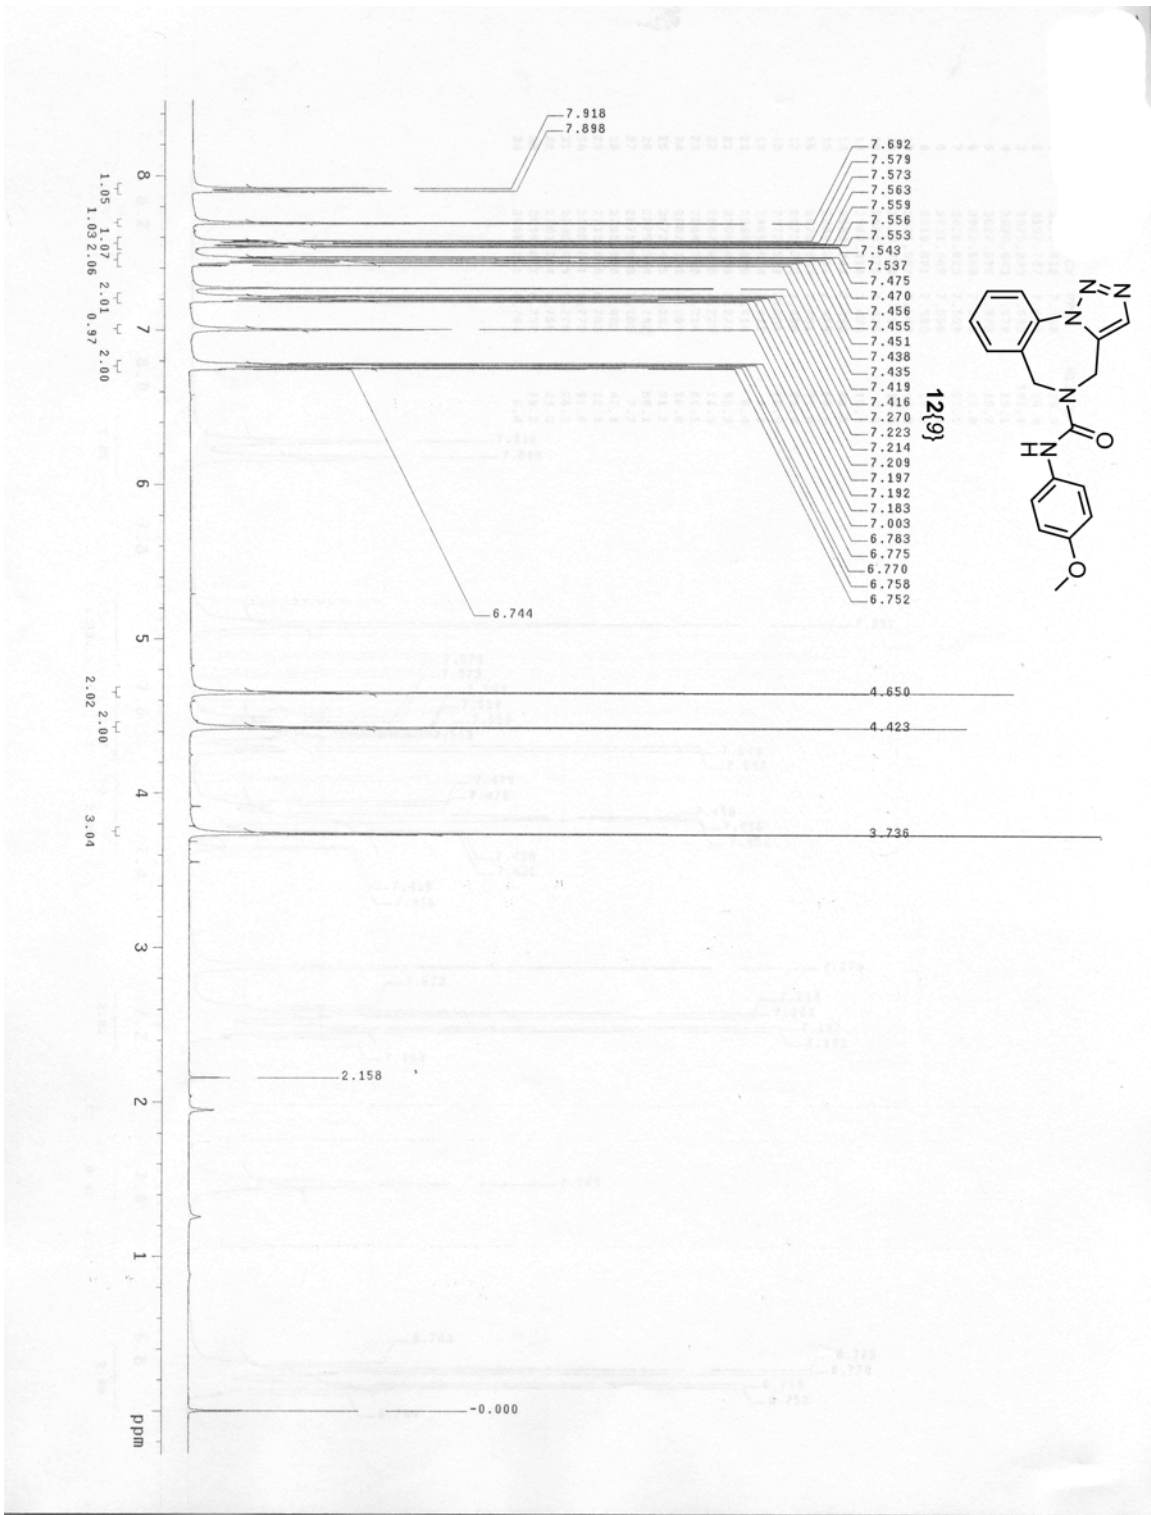

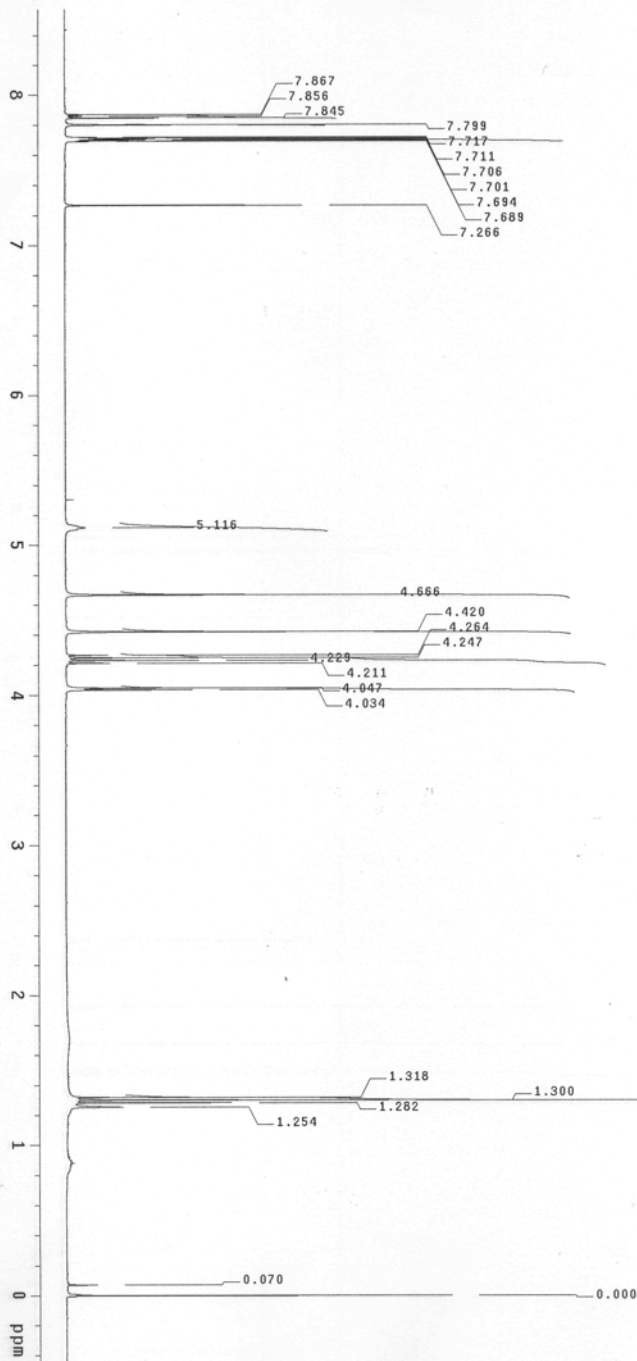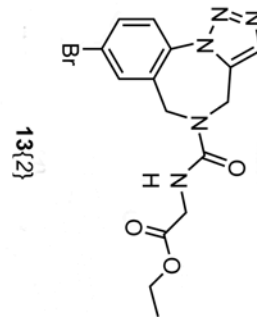

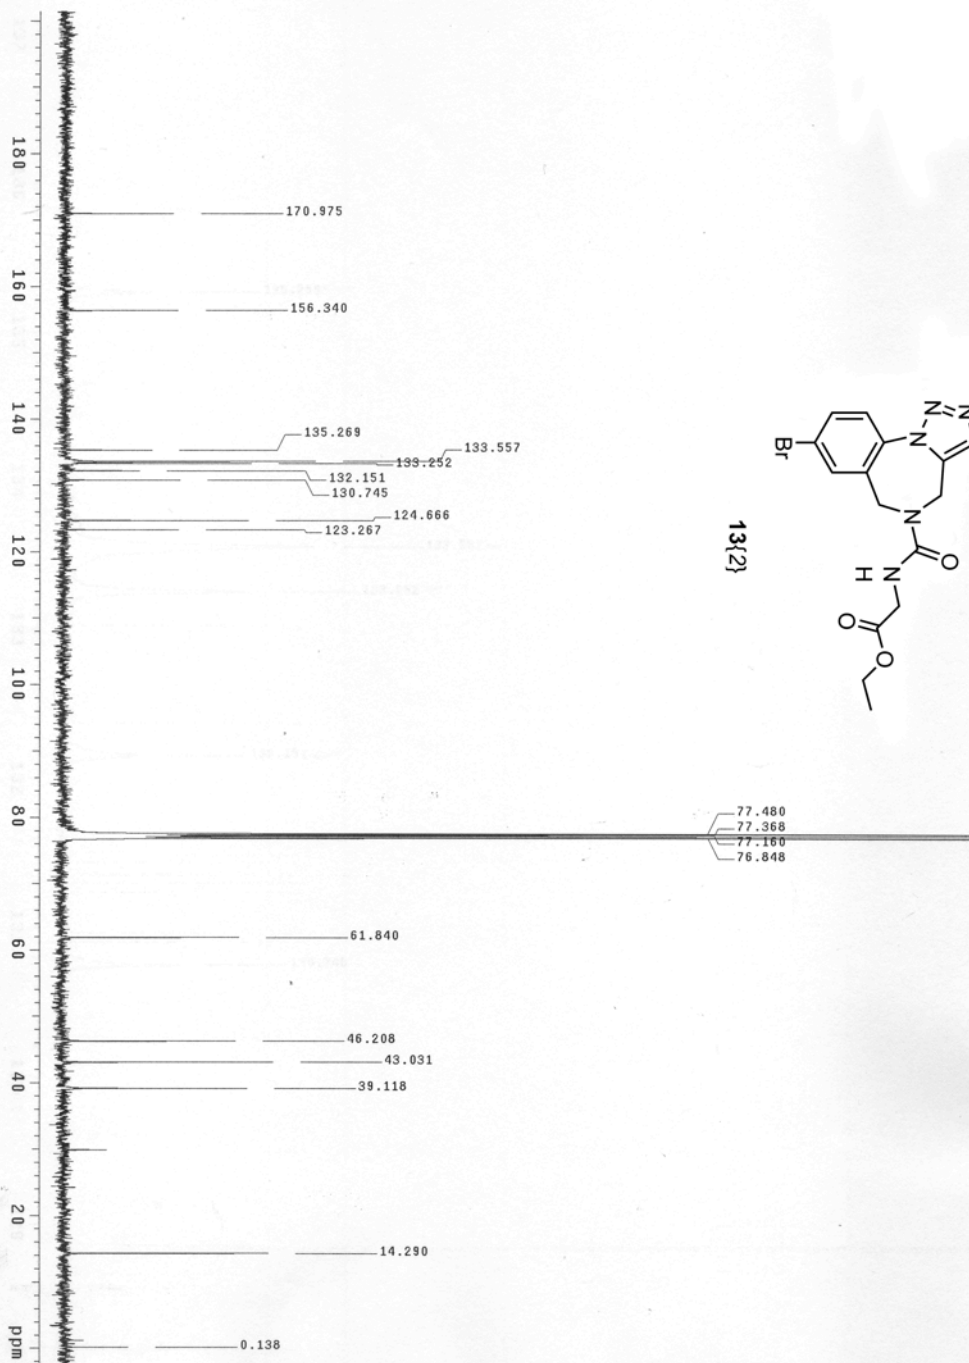



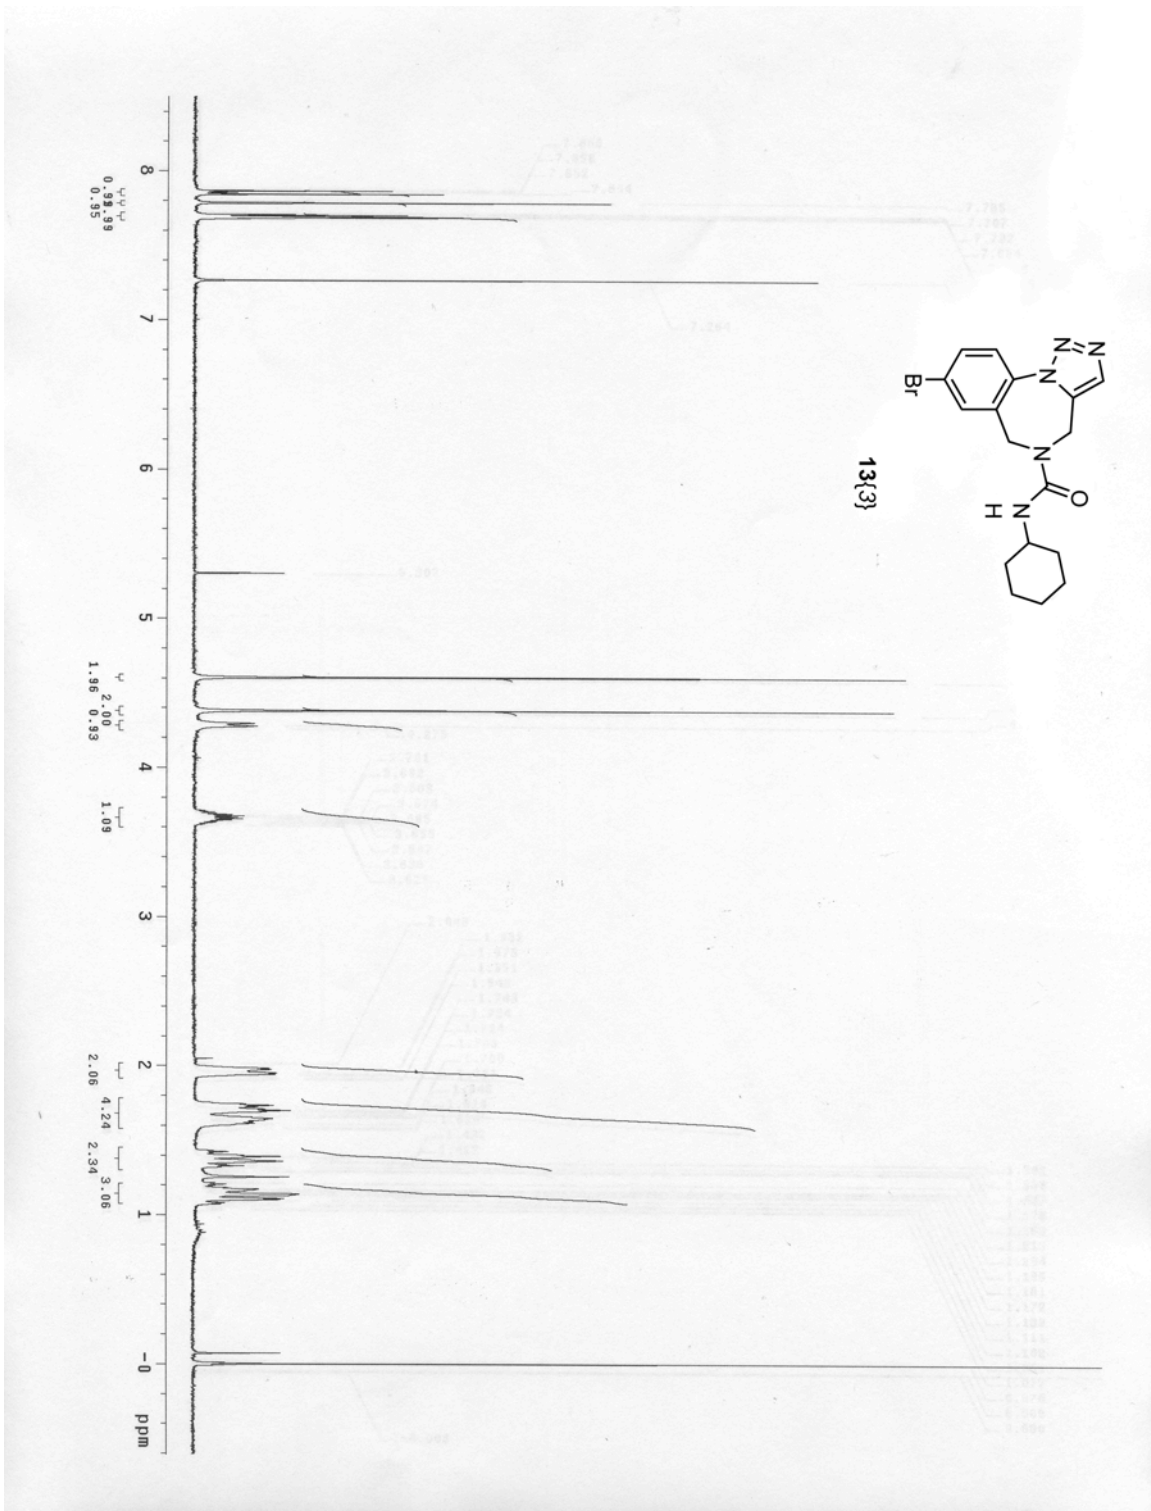

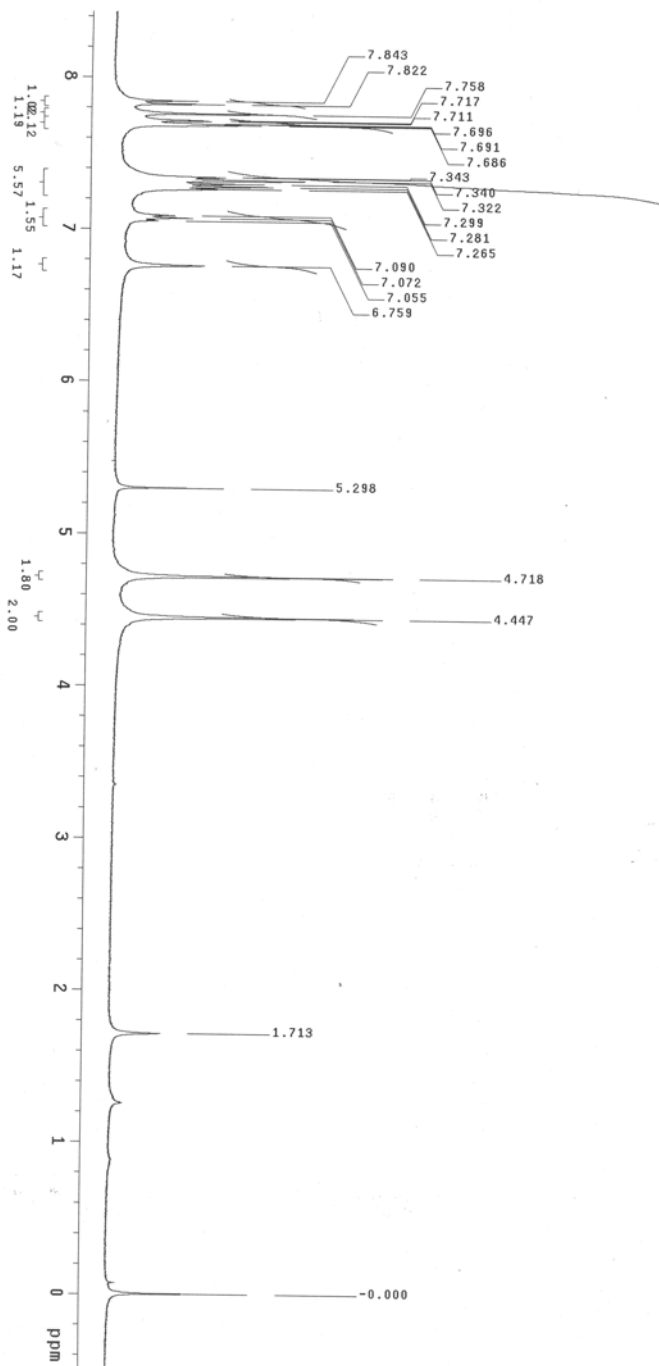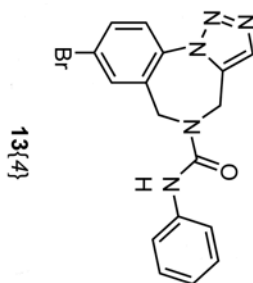

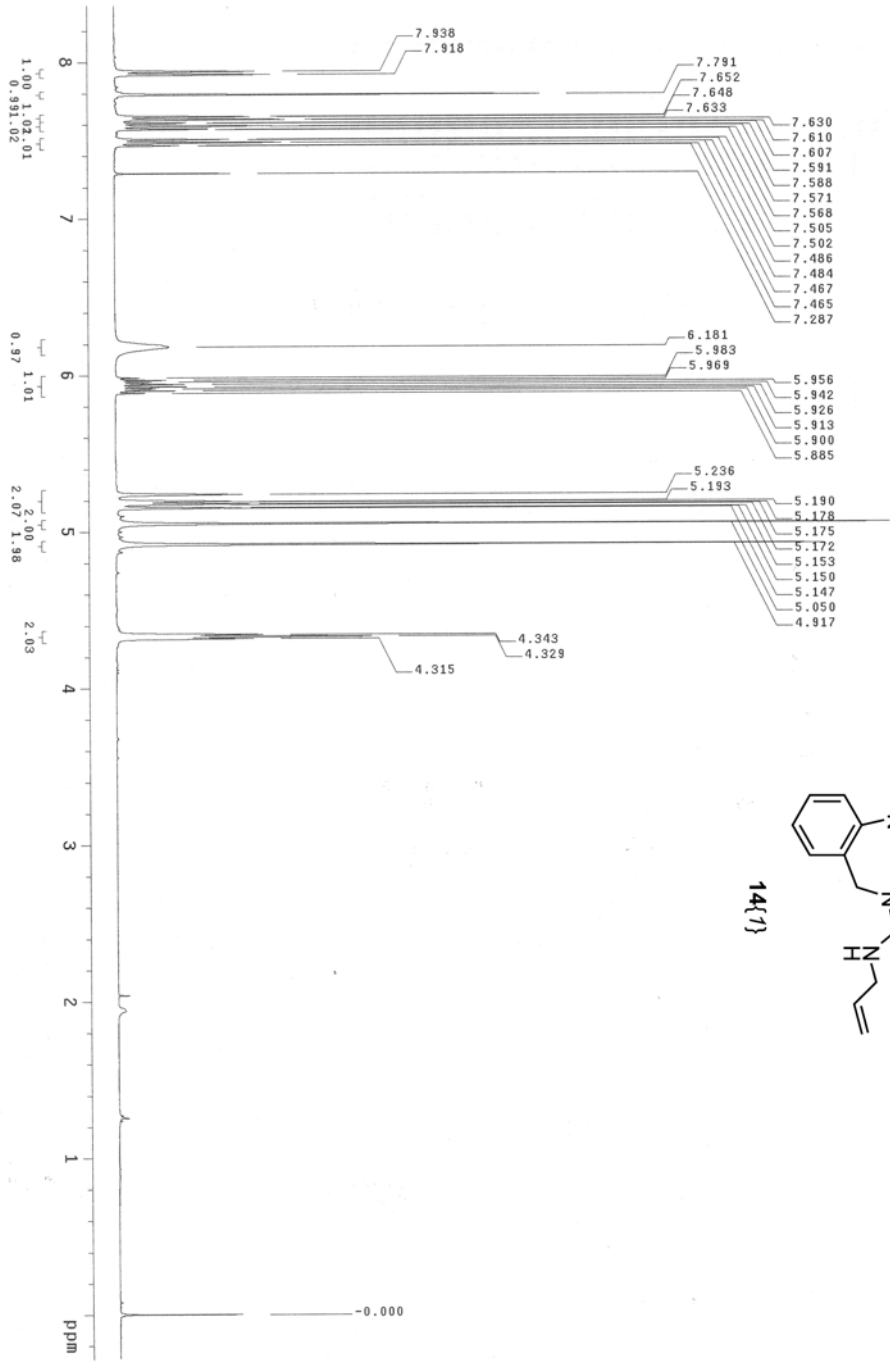

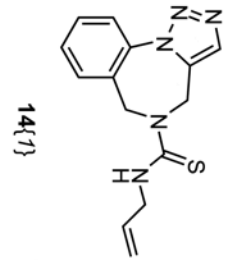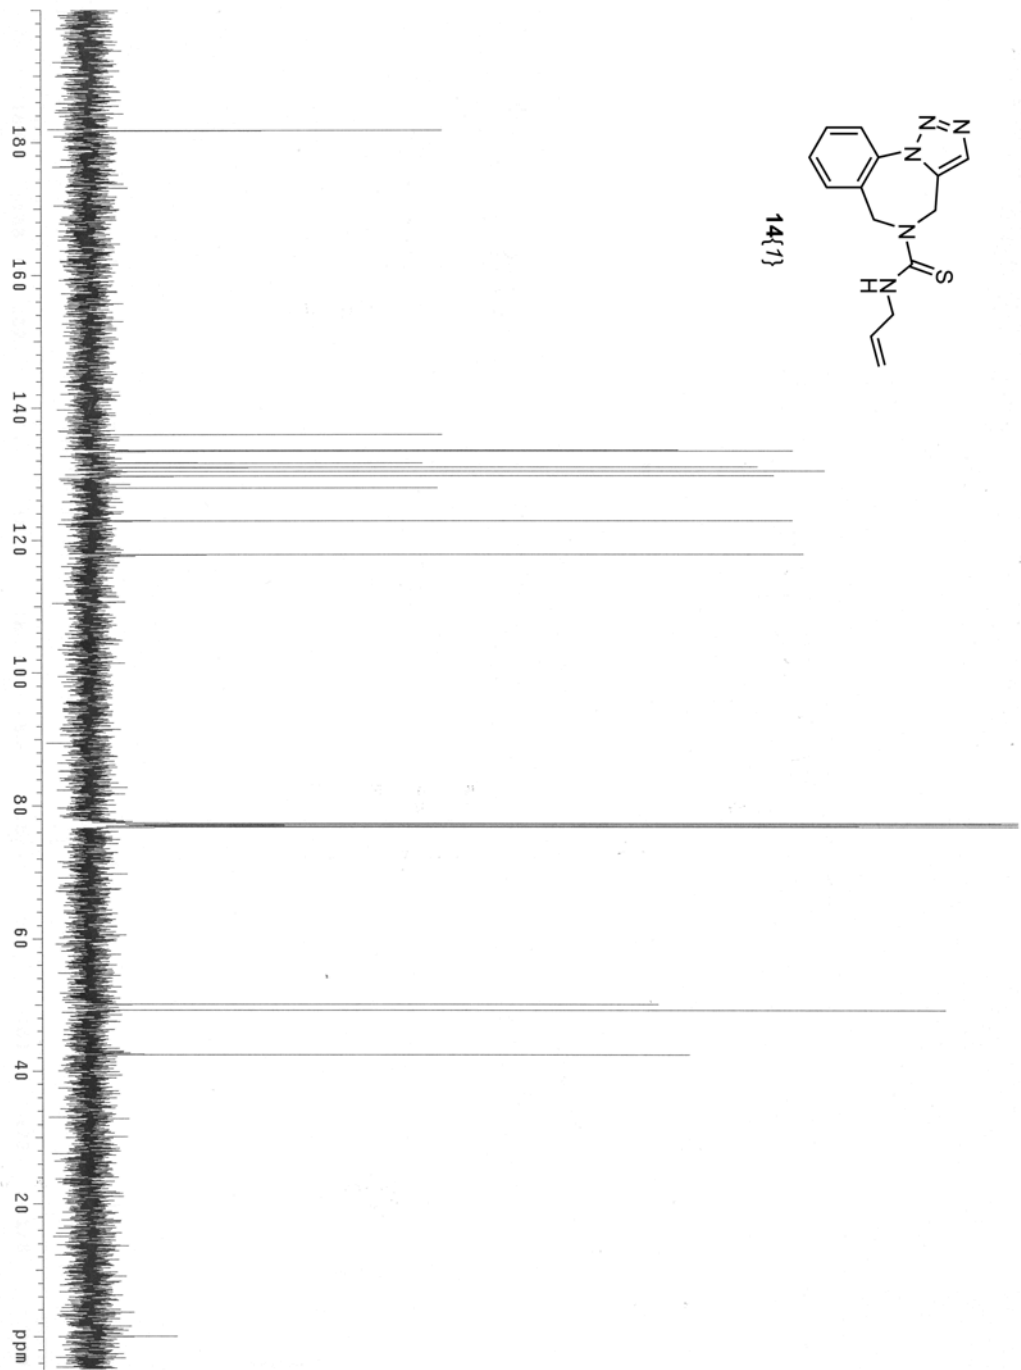

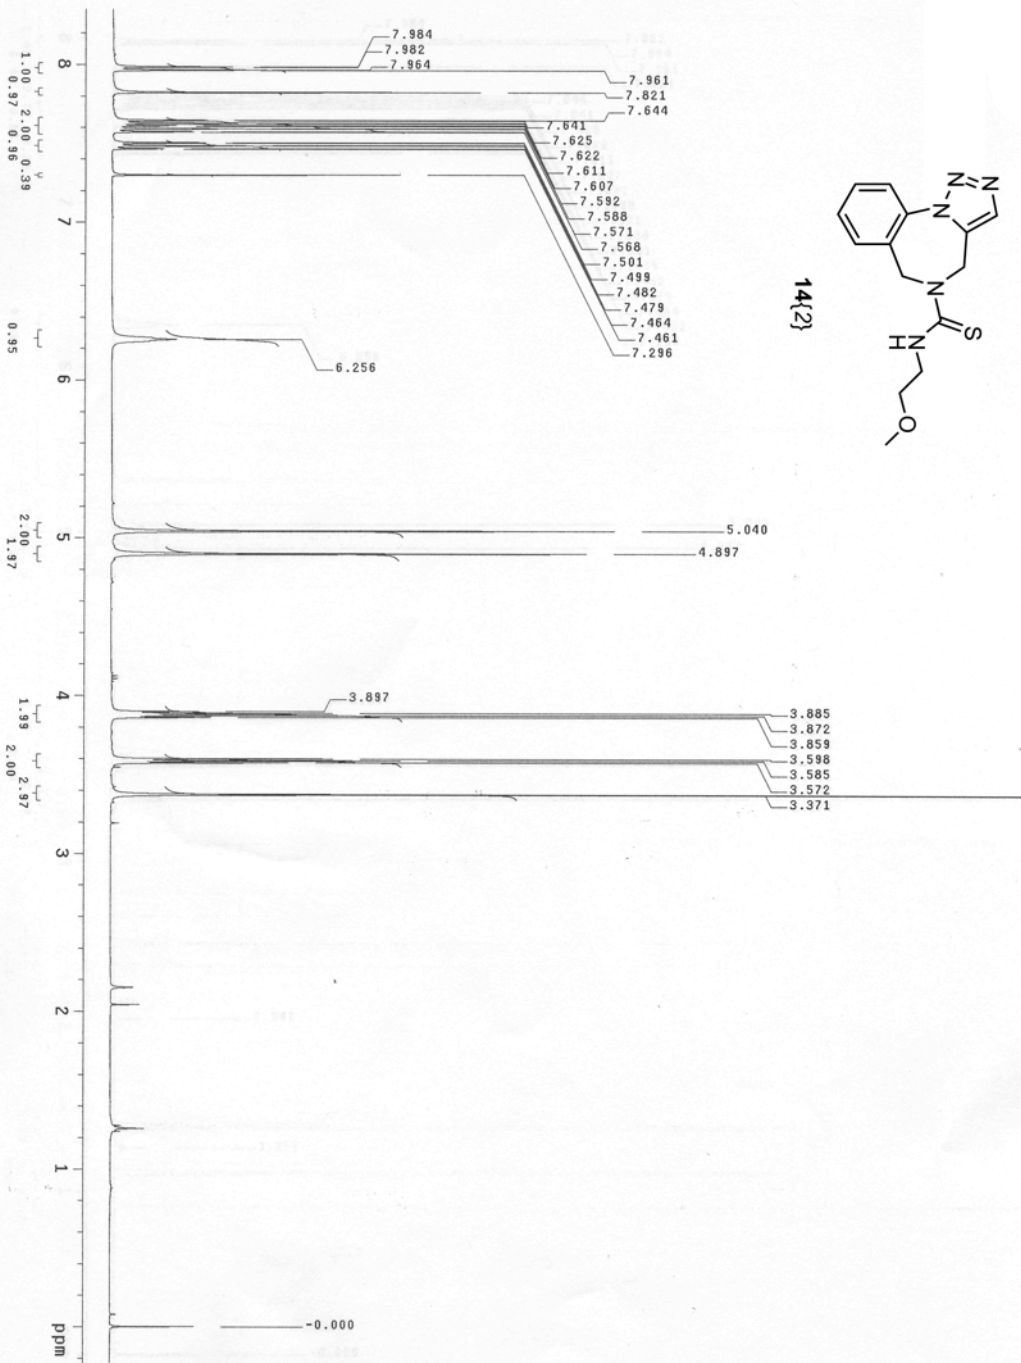

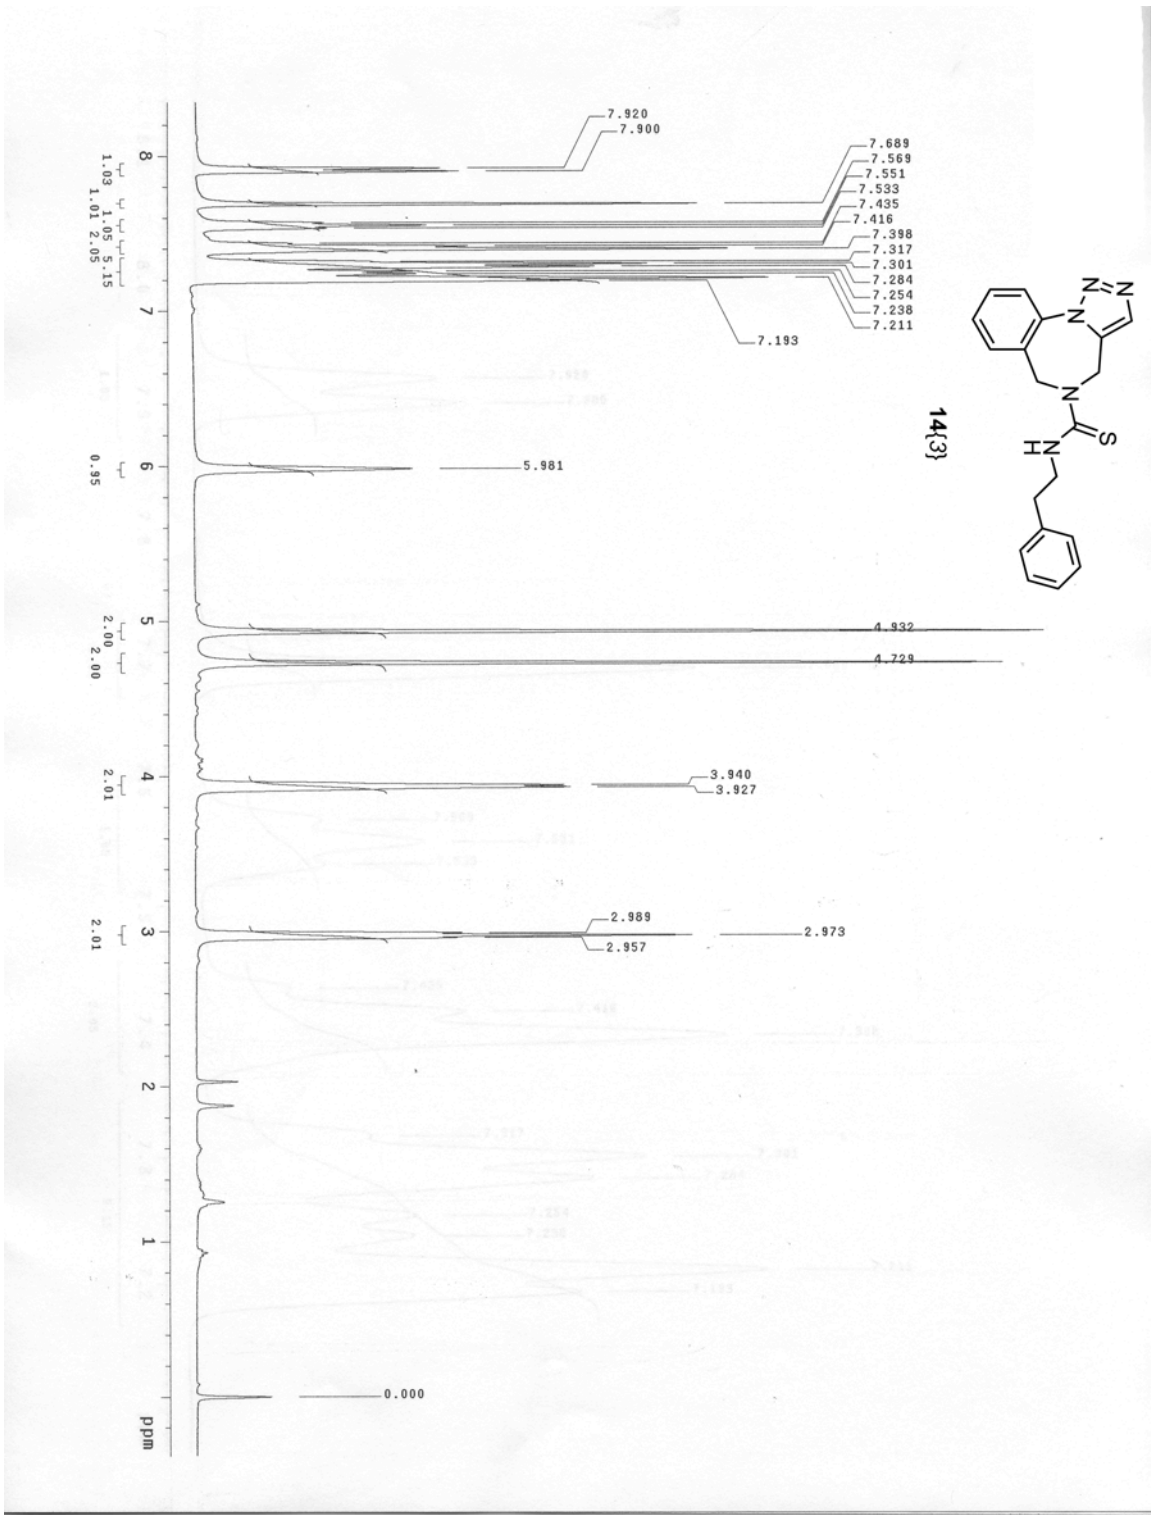

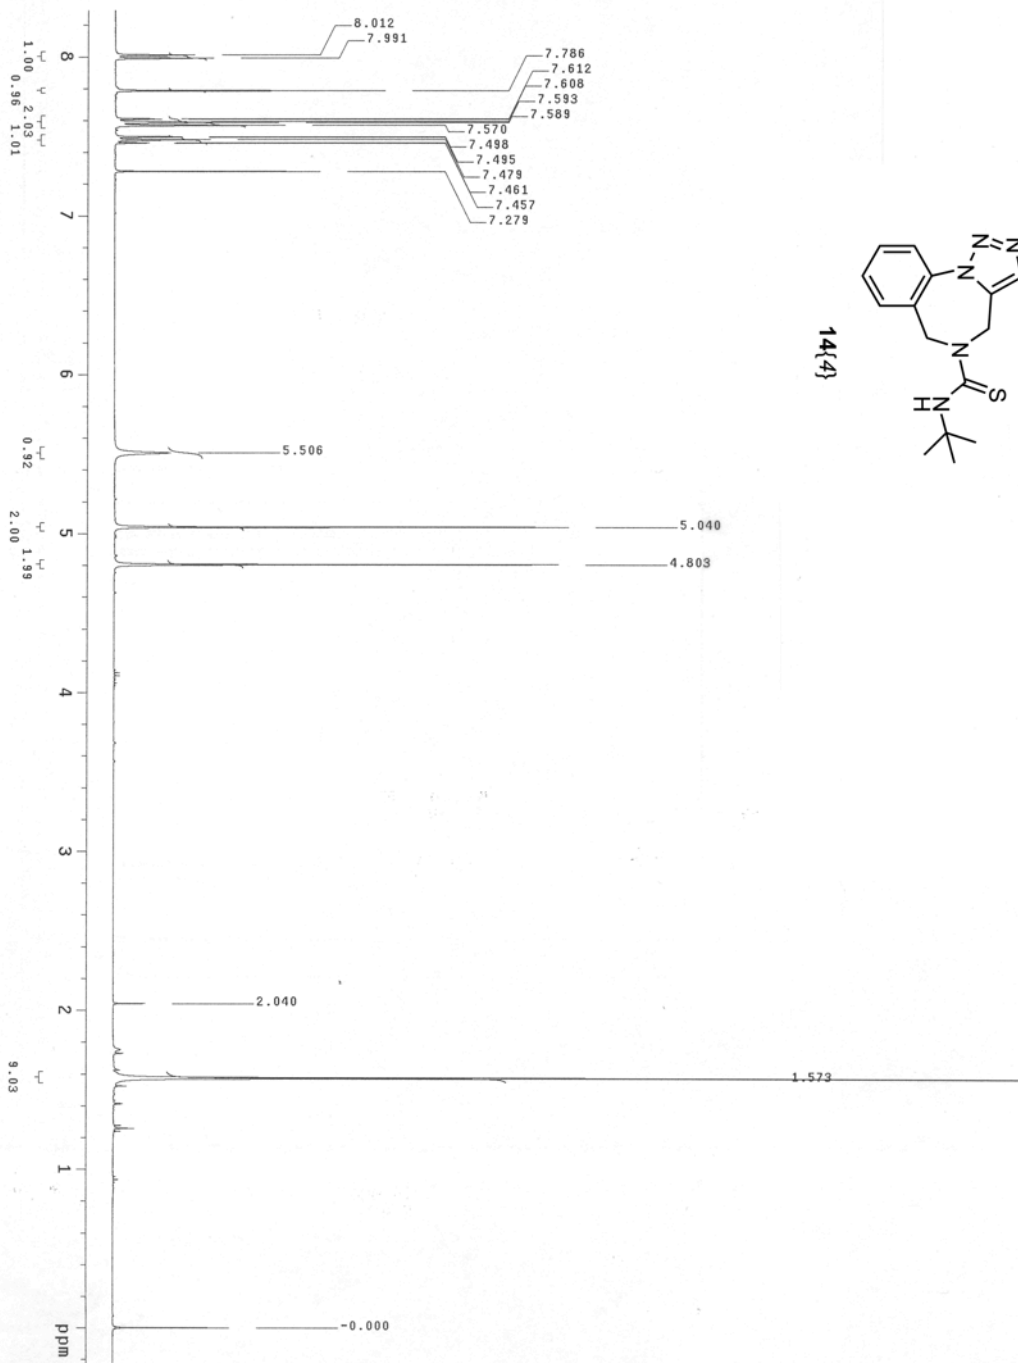

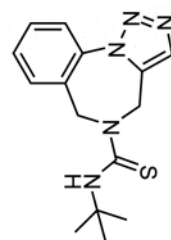

14(4)

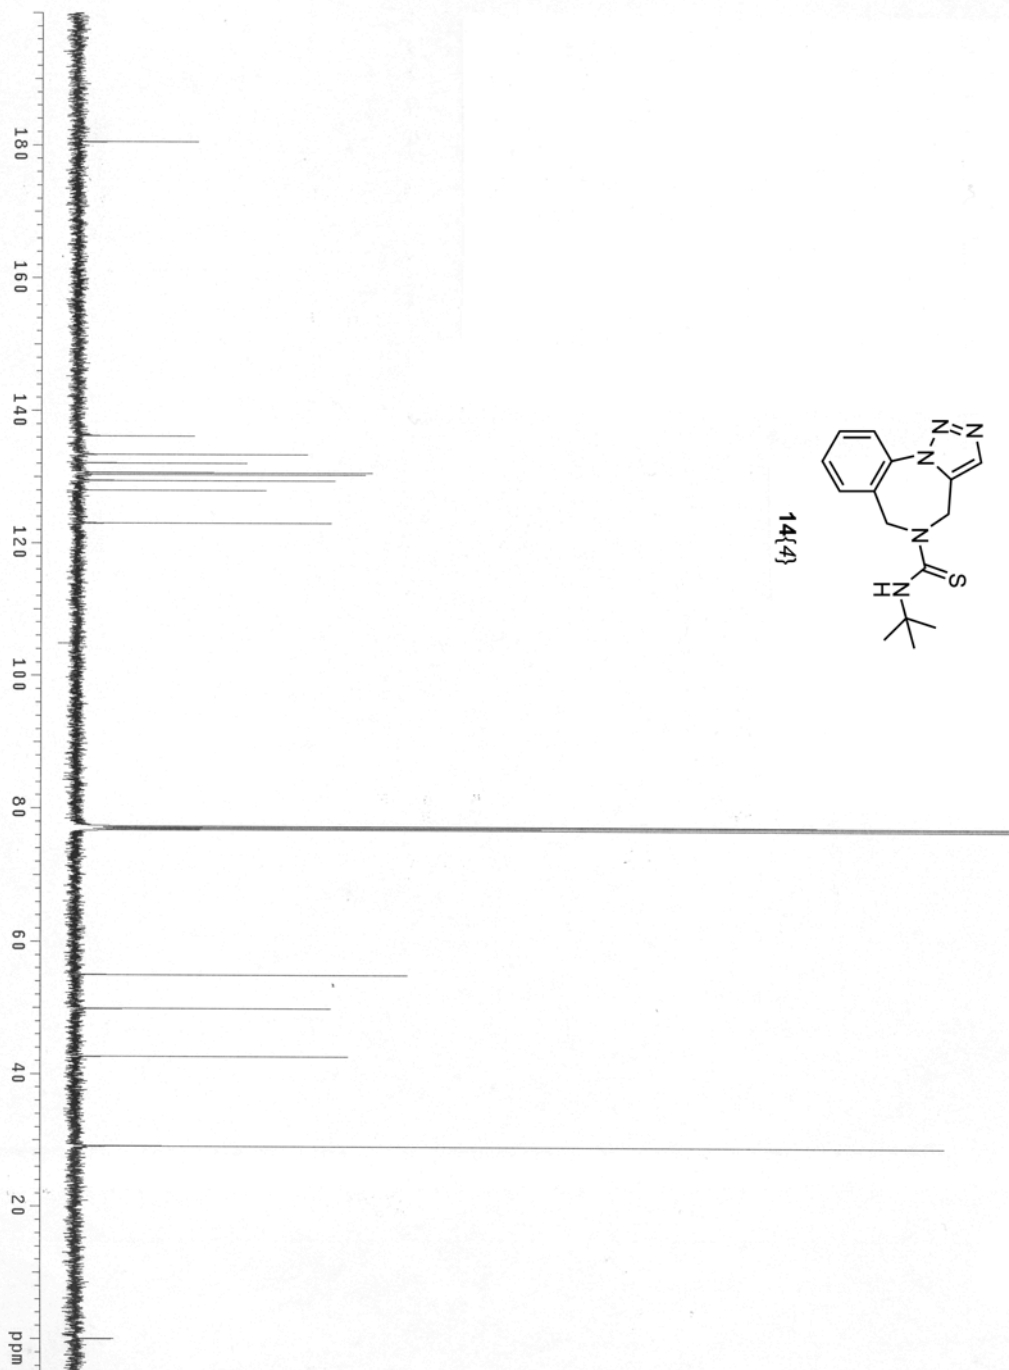



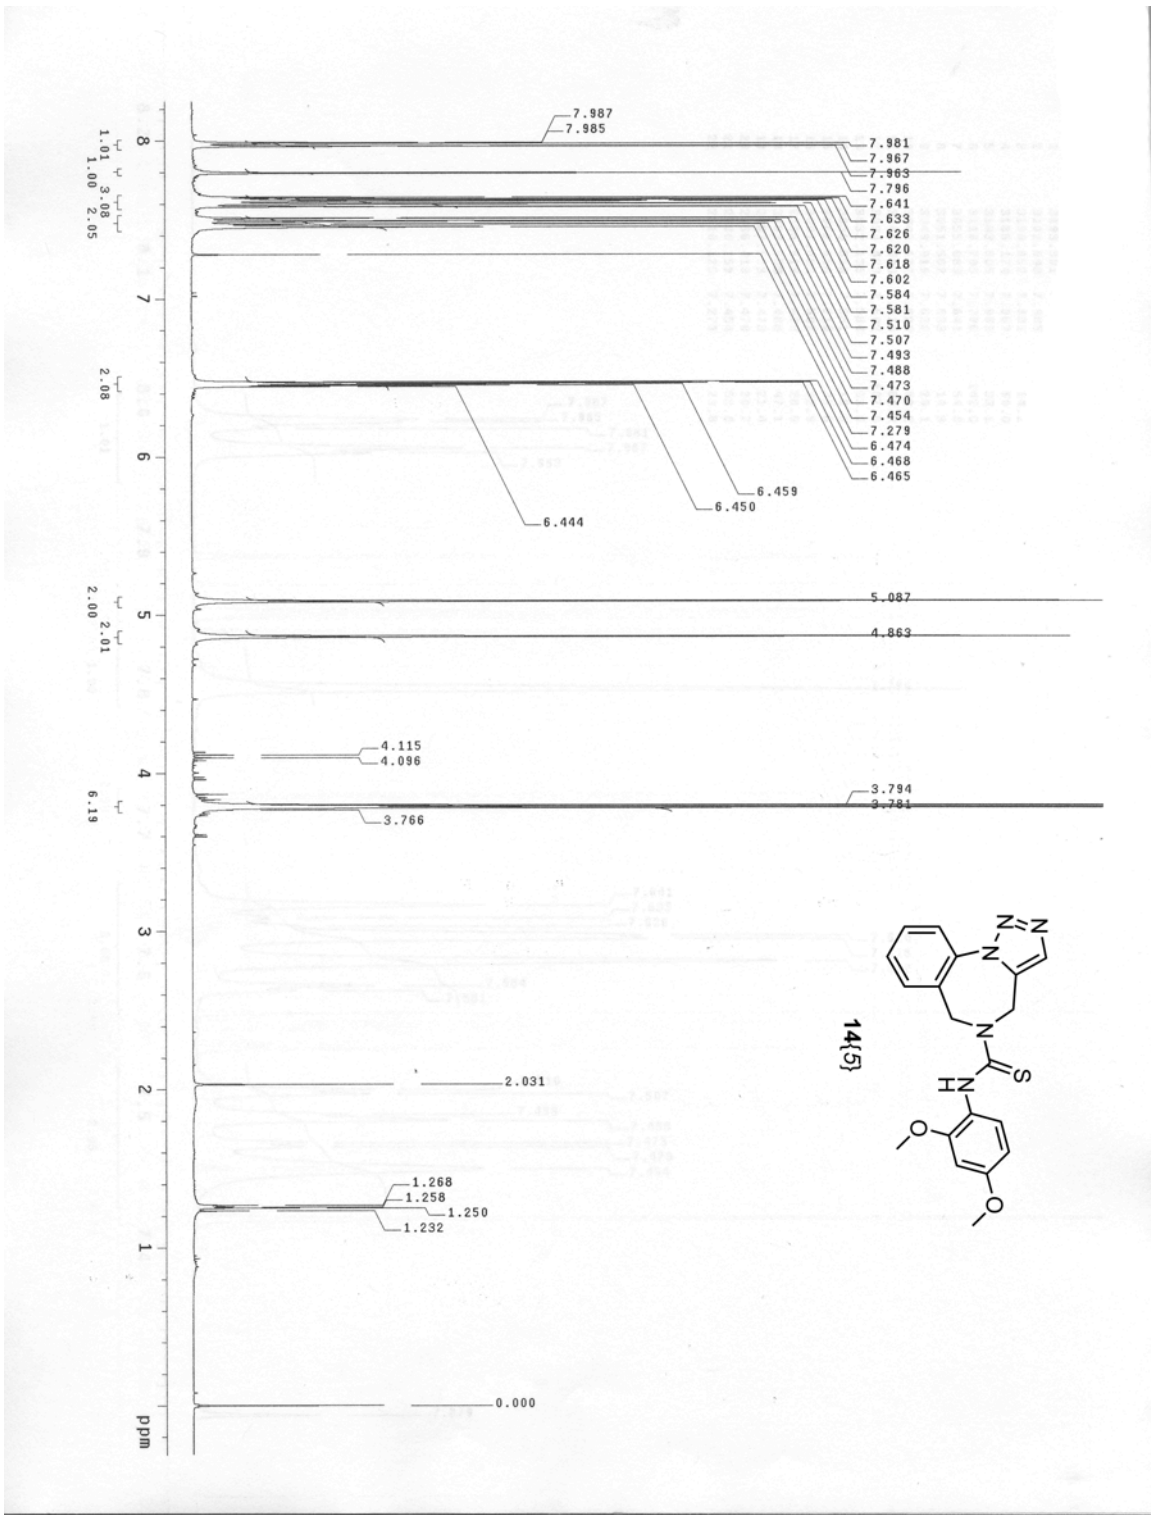

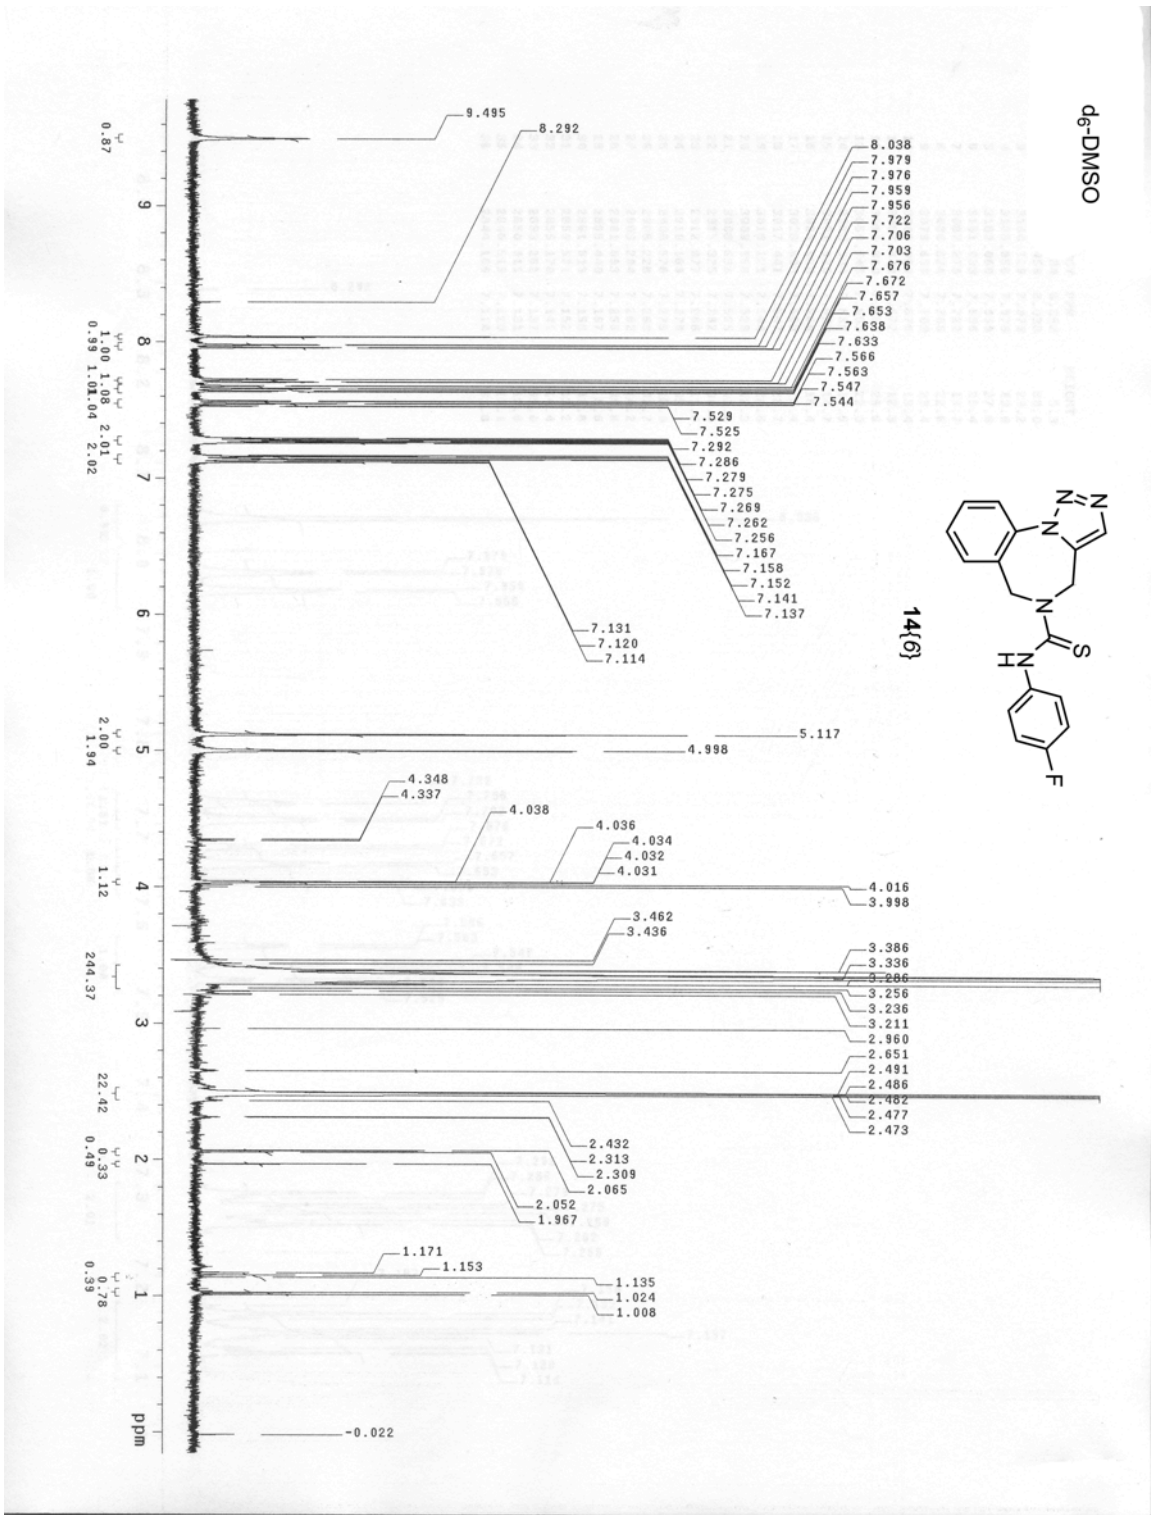

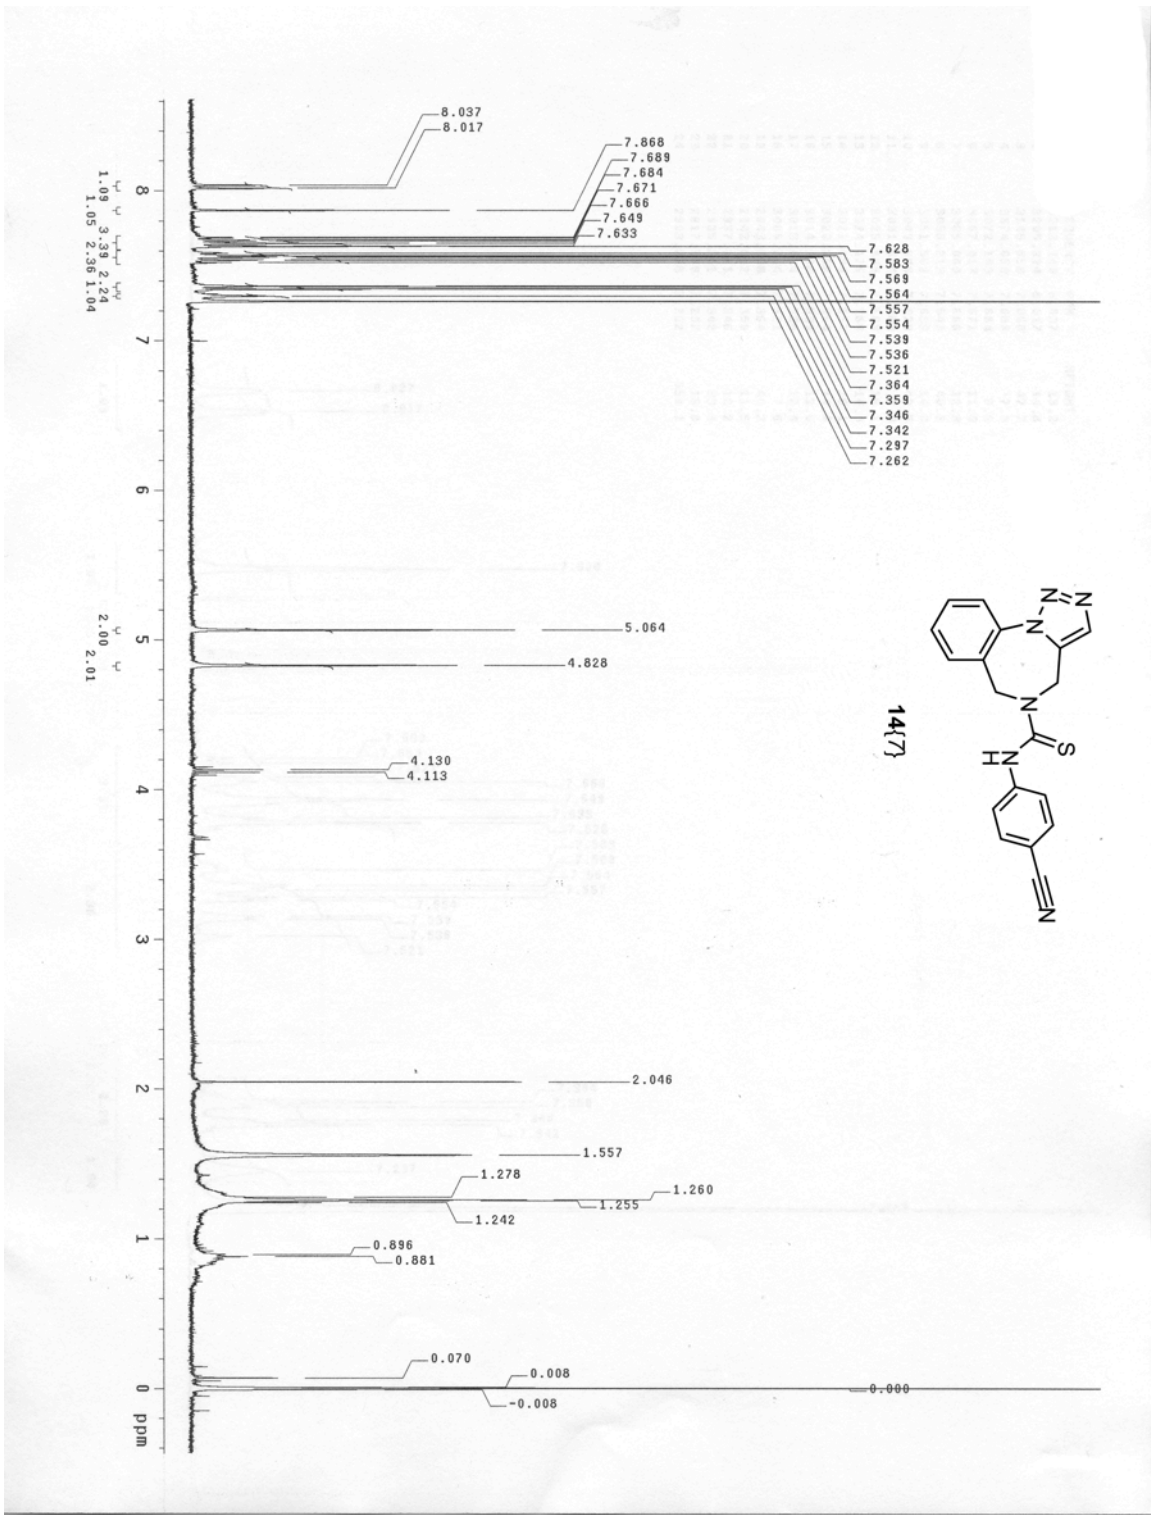

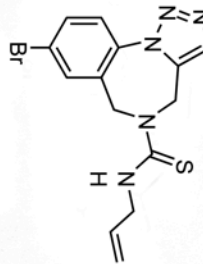

15(1)

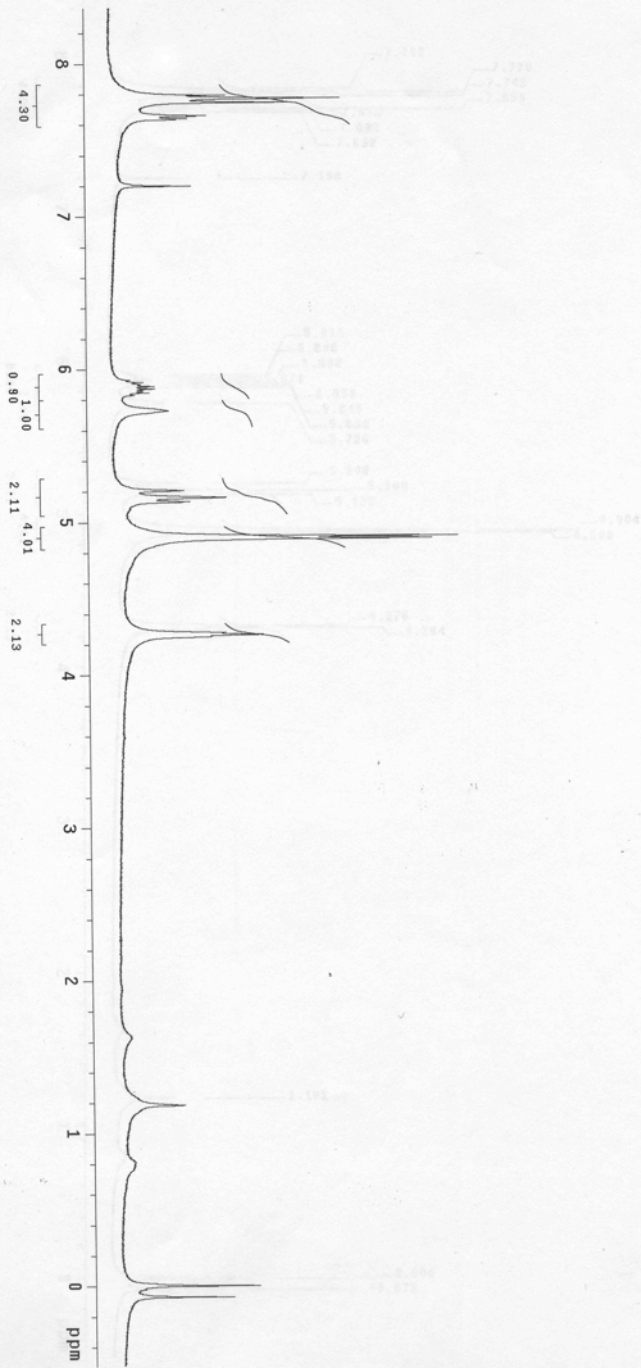

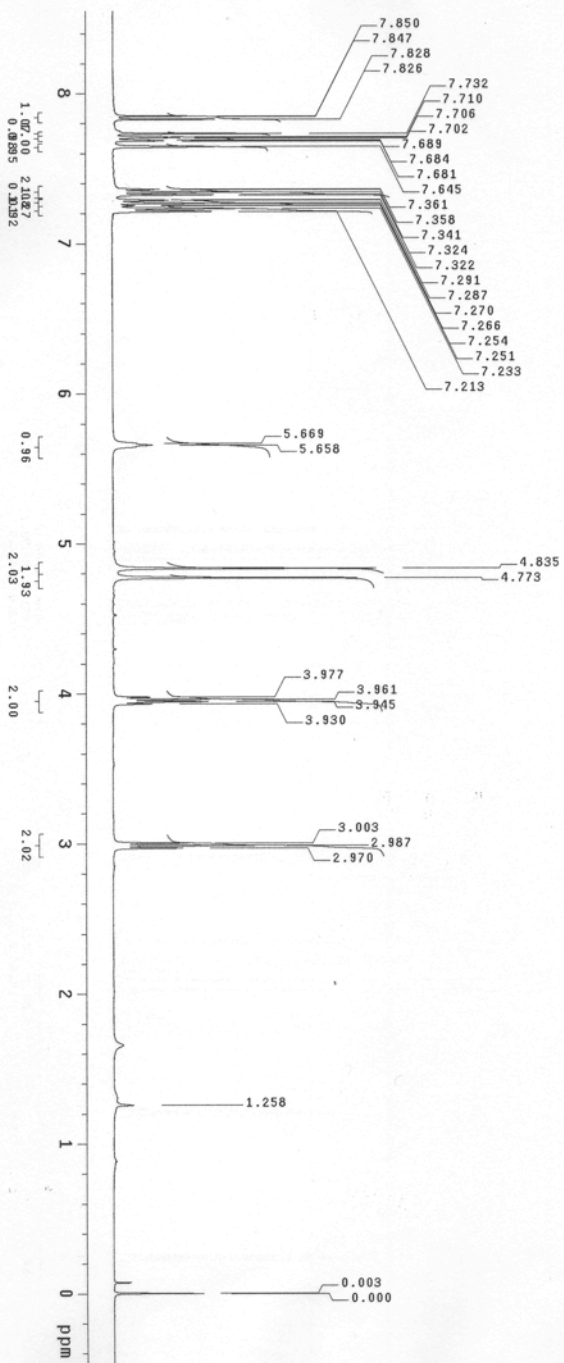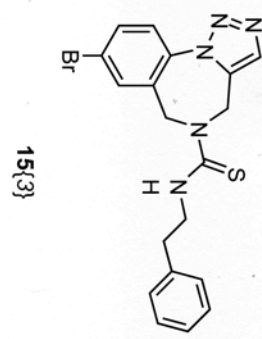

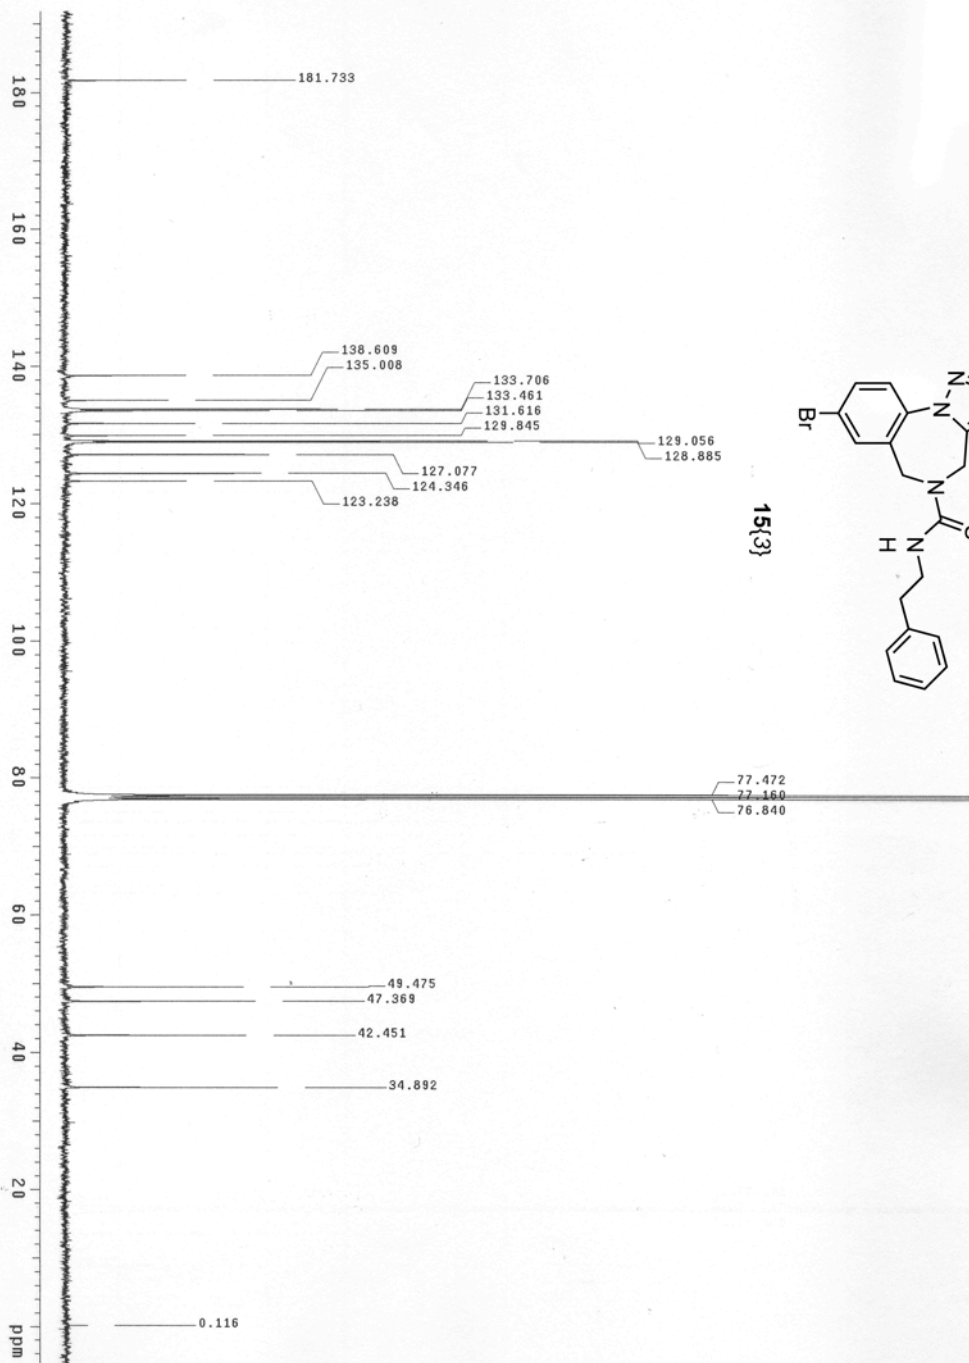

d<sub>3</sub>-MeCN

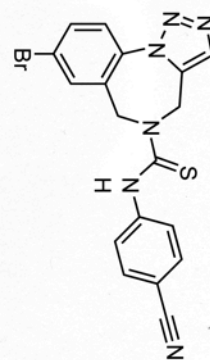

15(7)

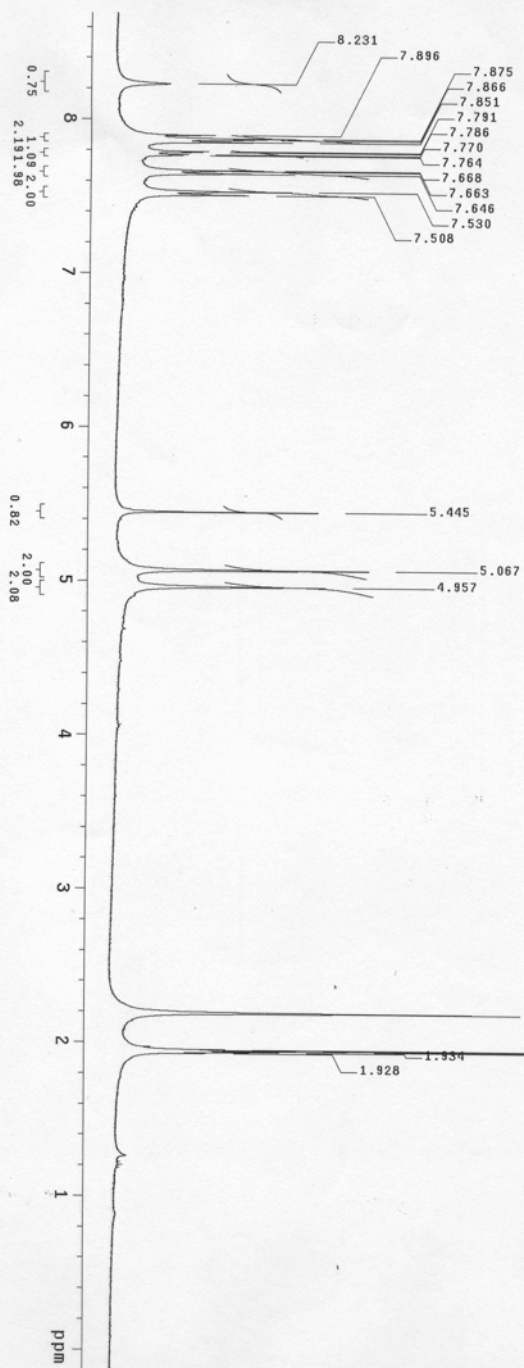

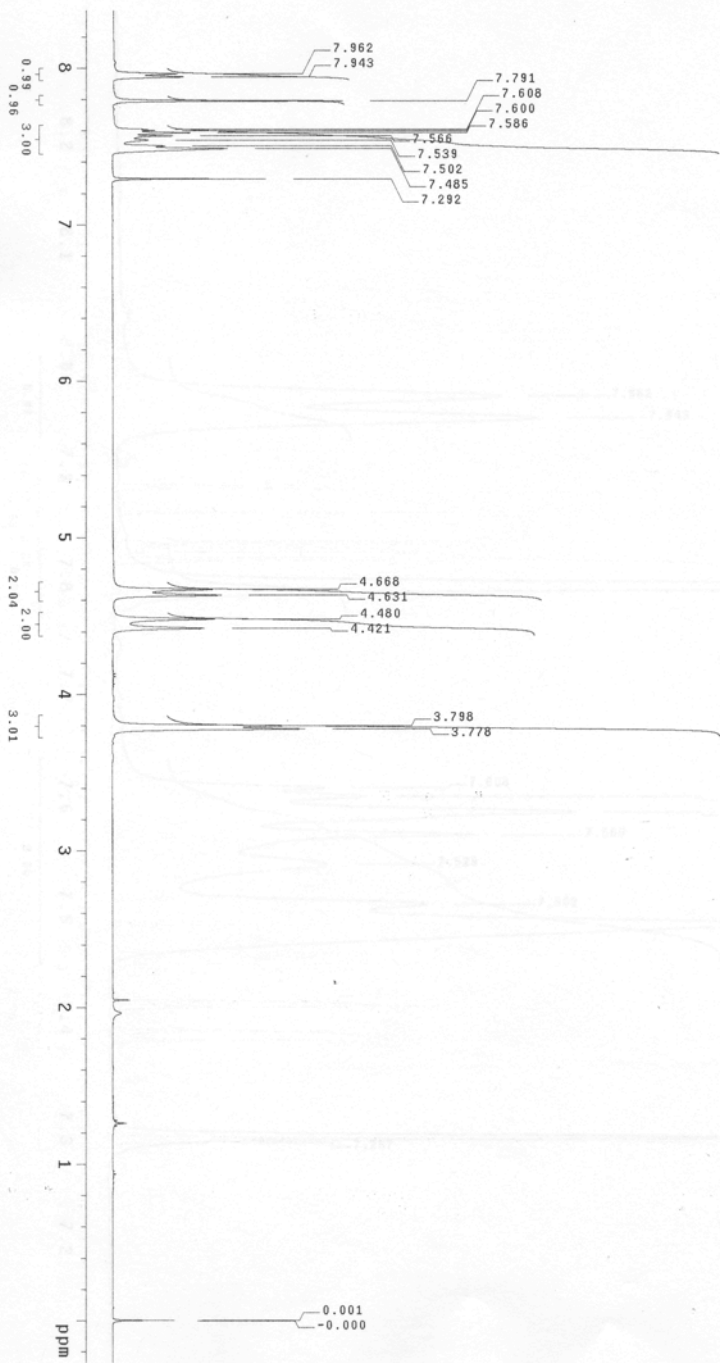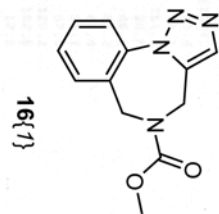



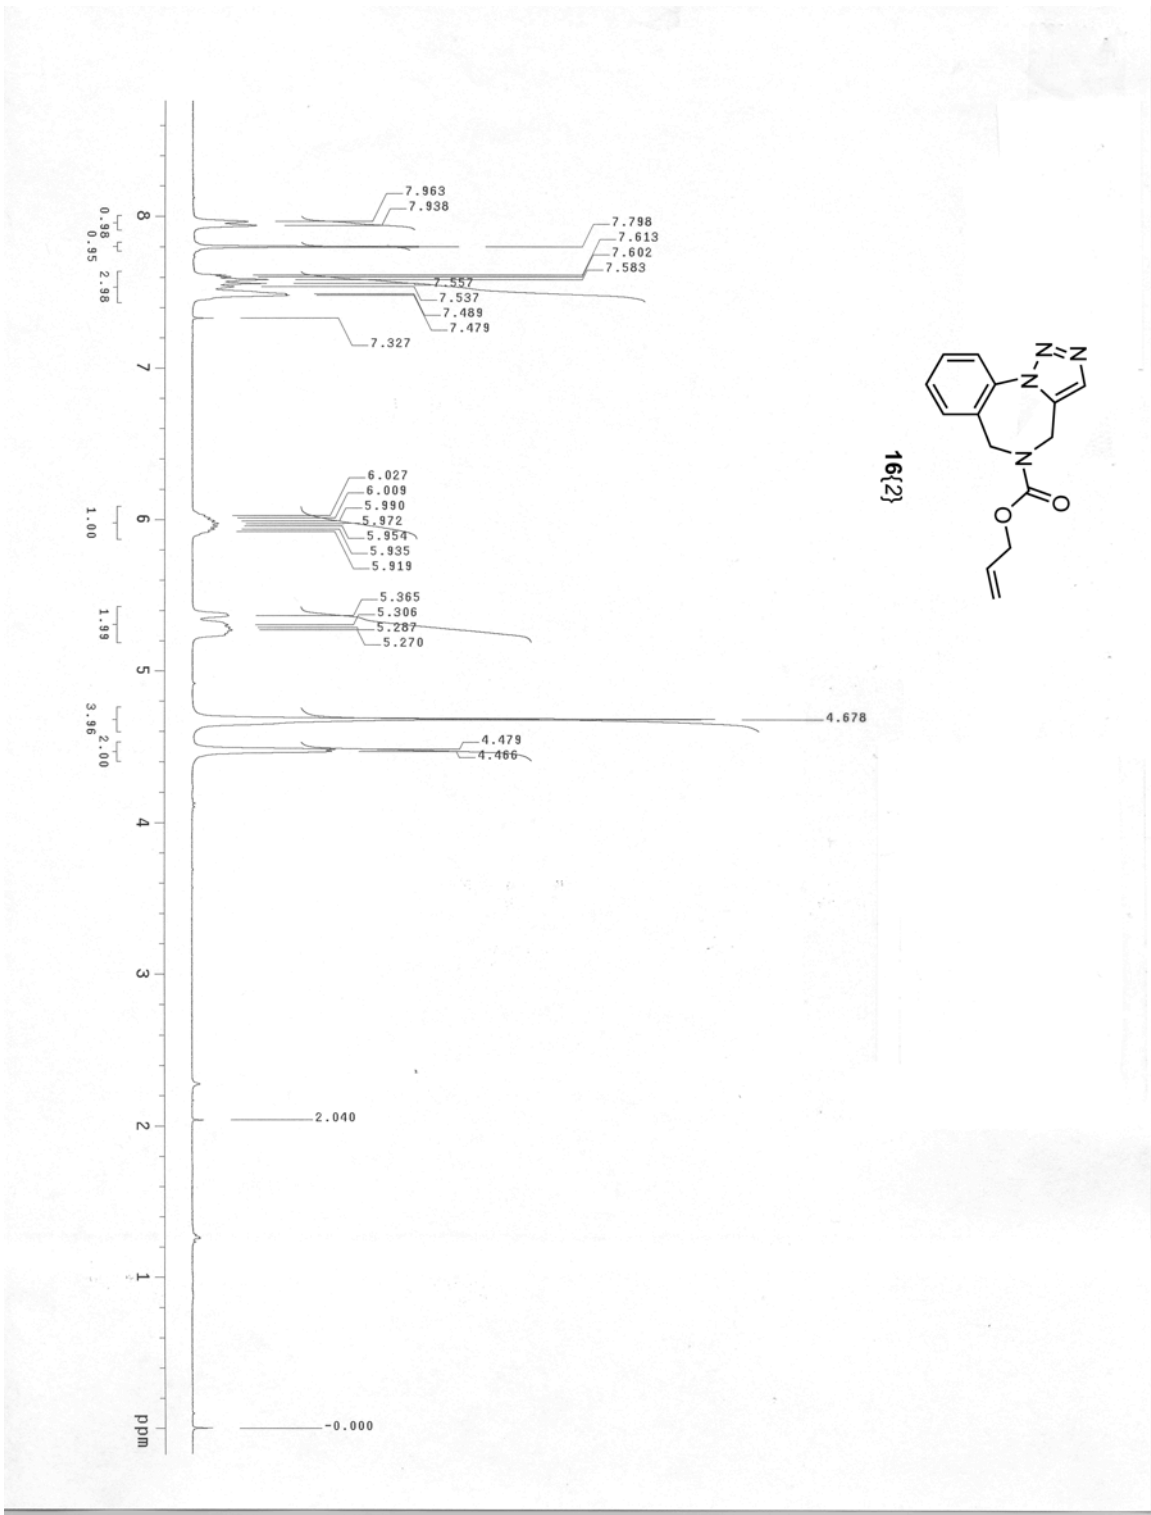

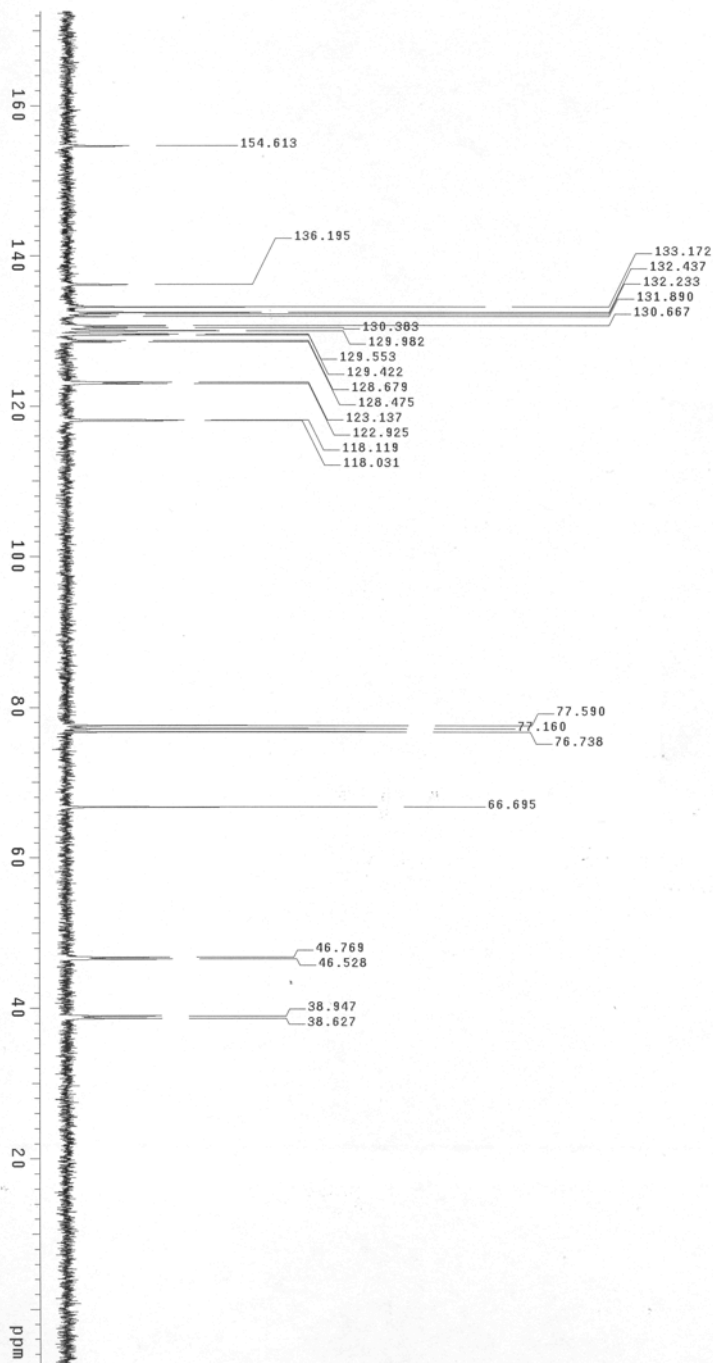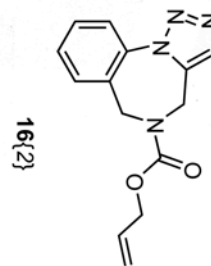

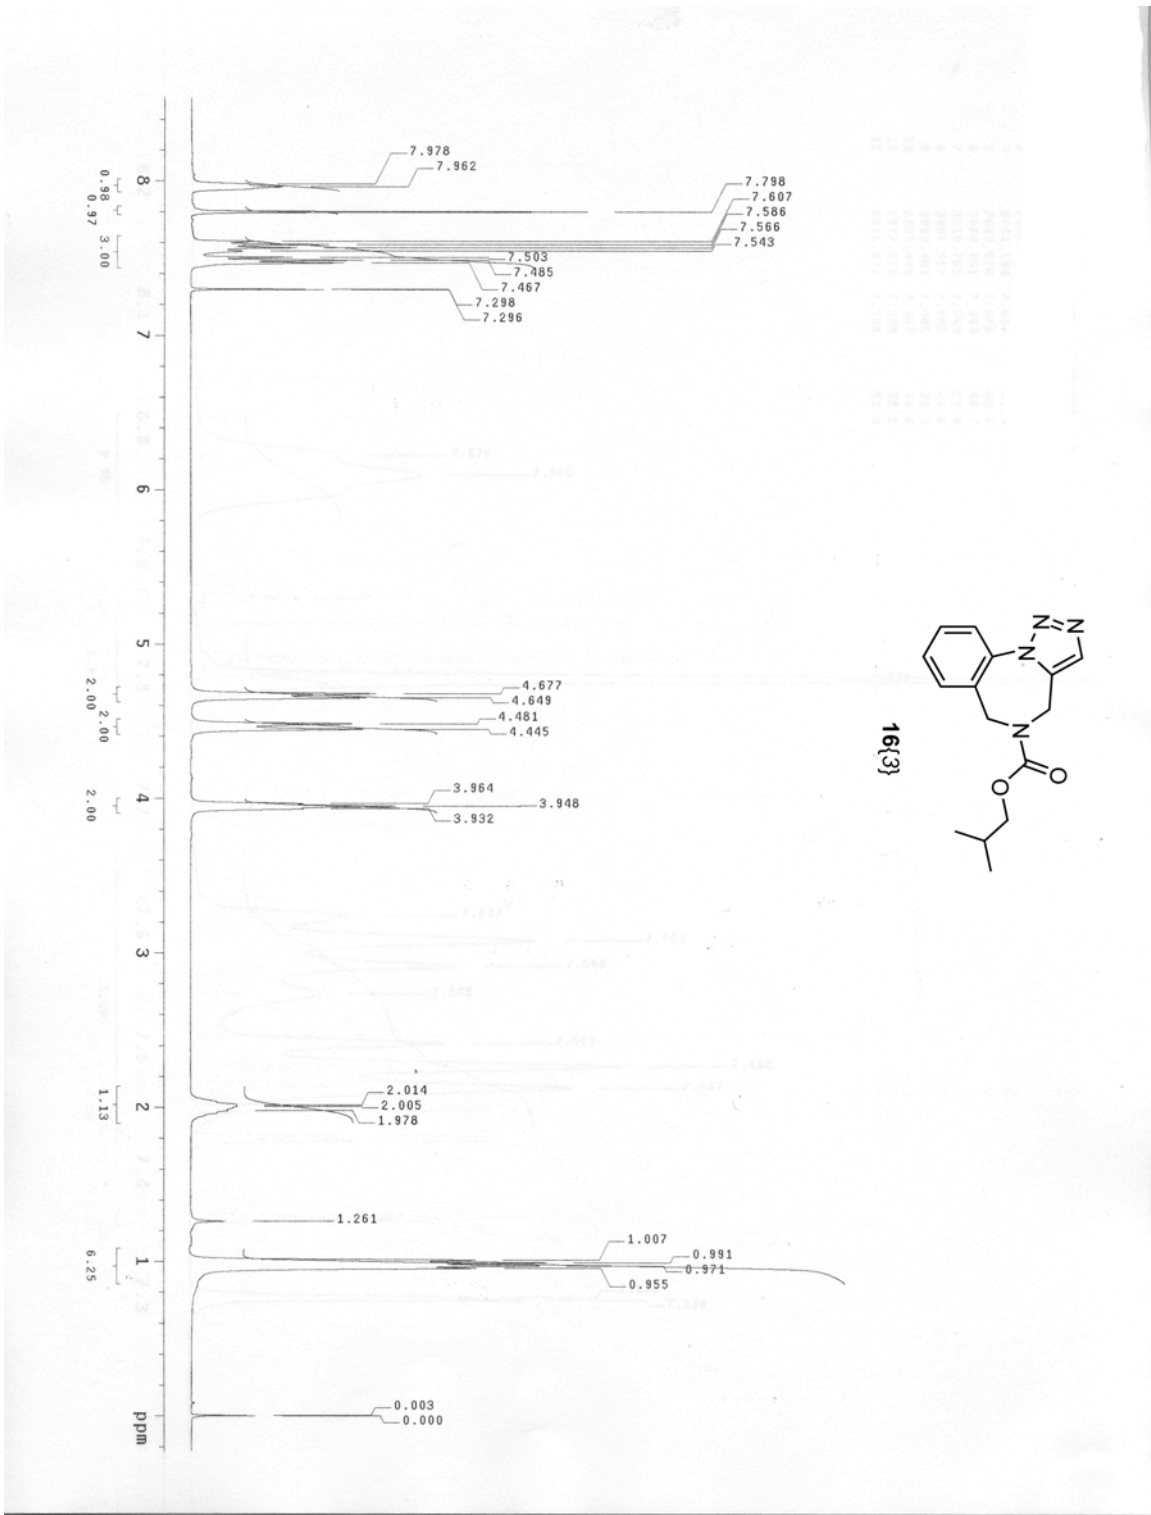

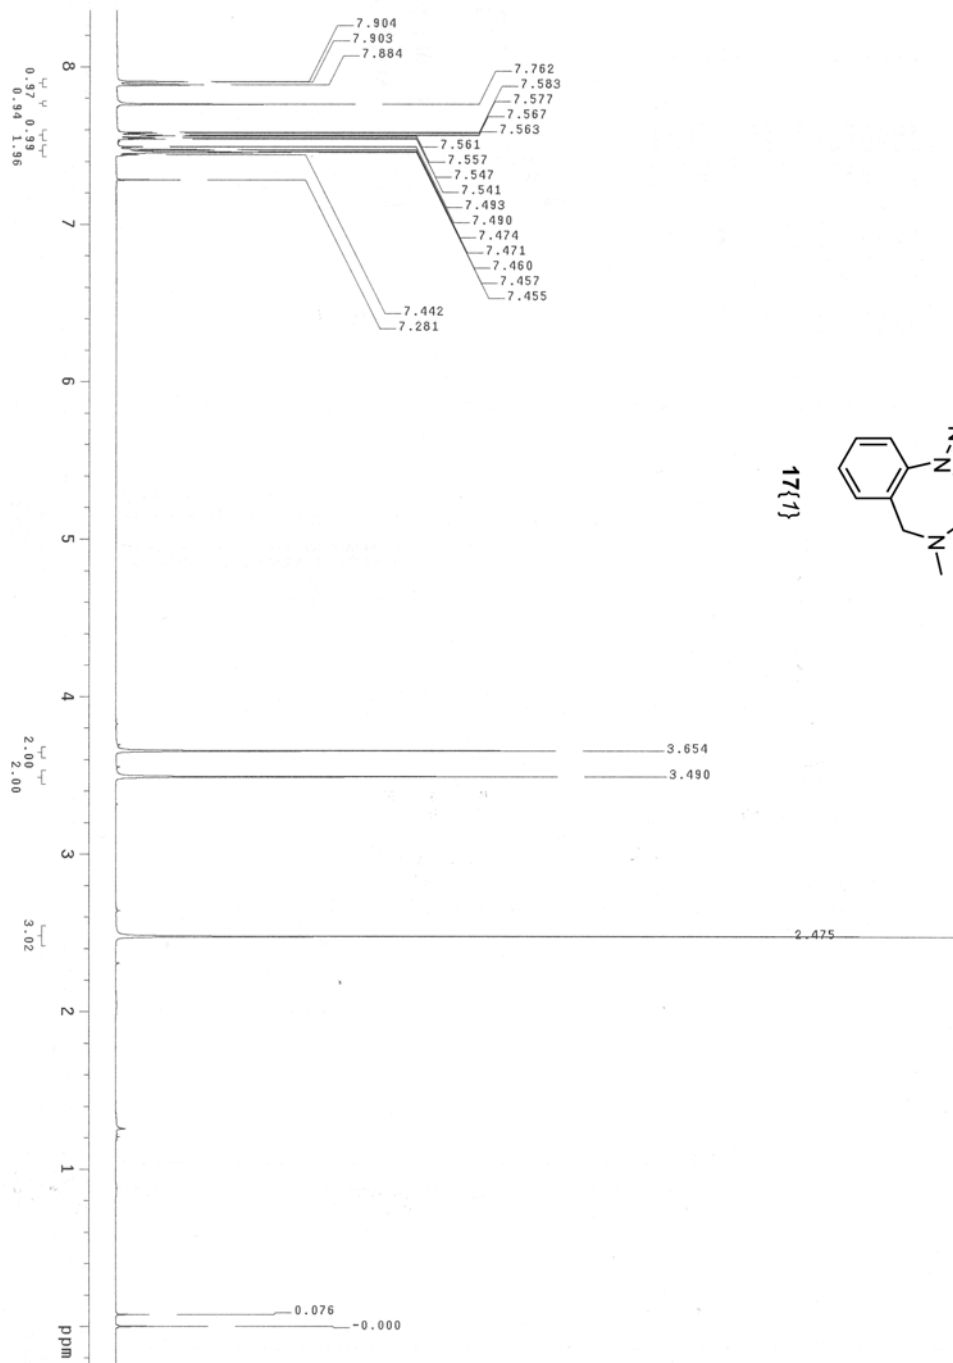

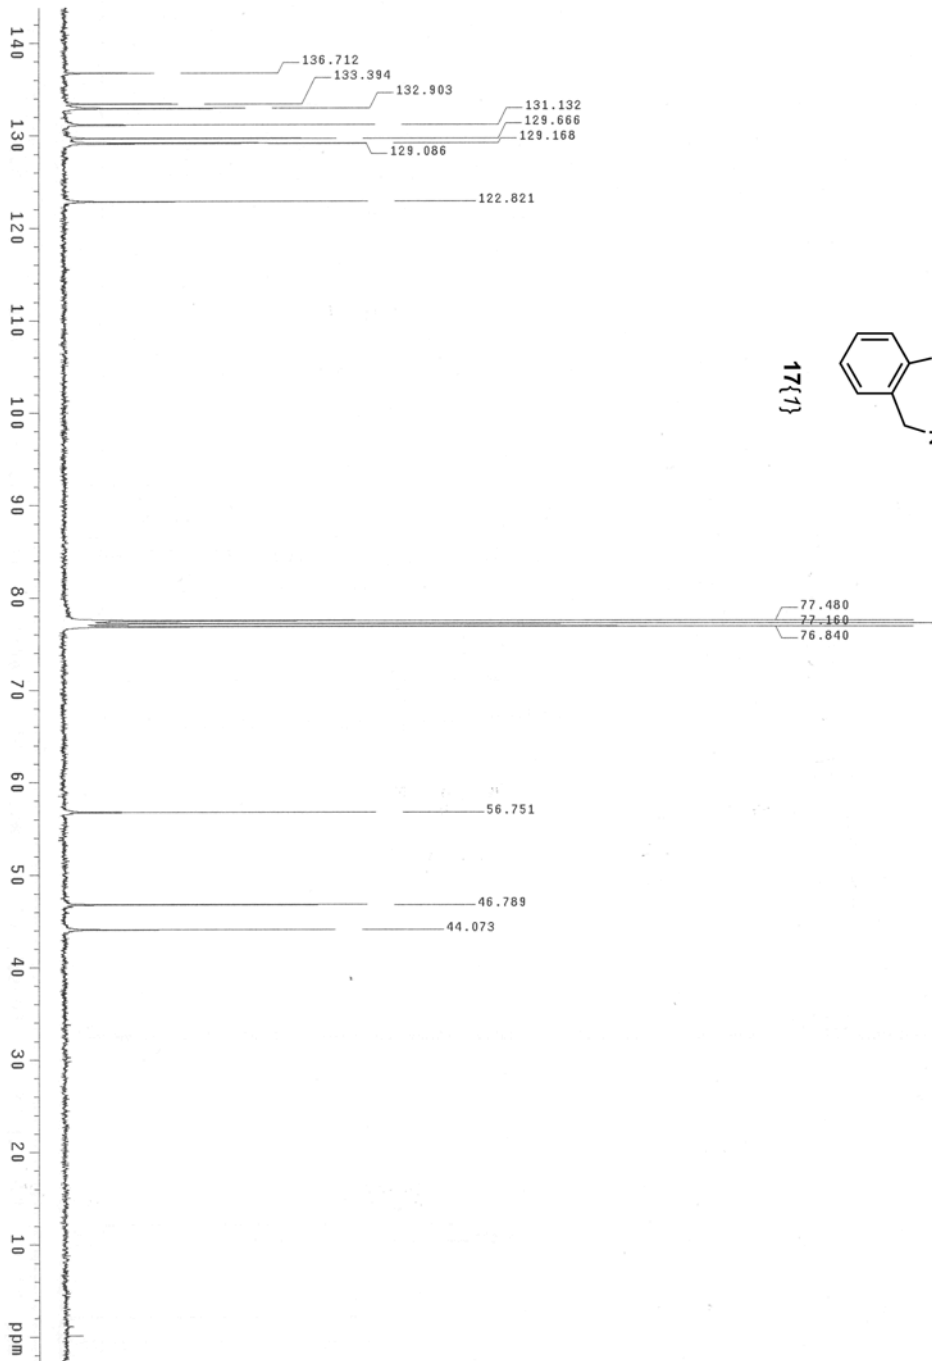

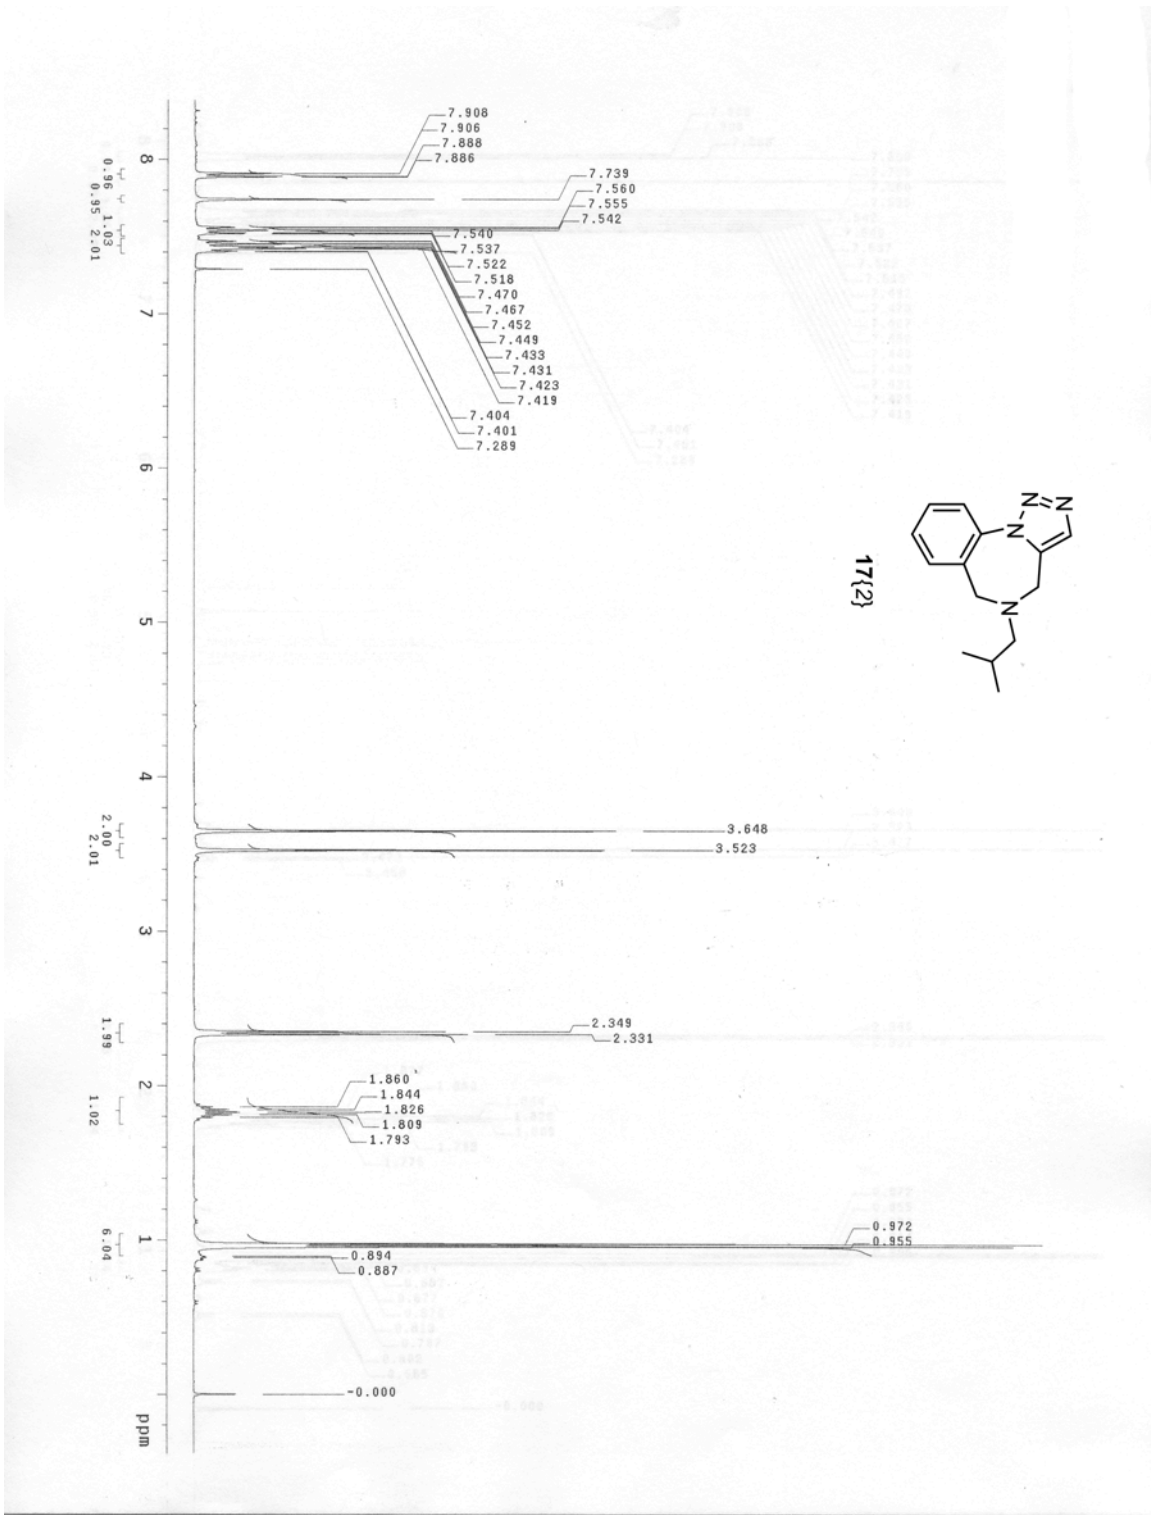

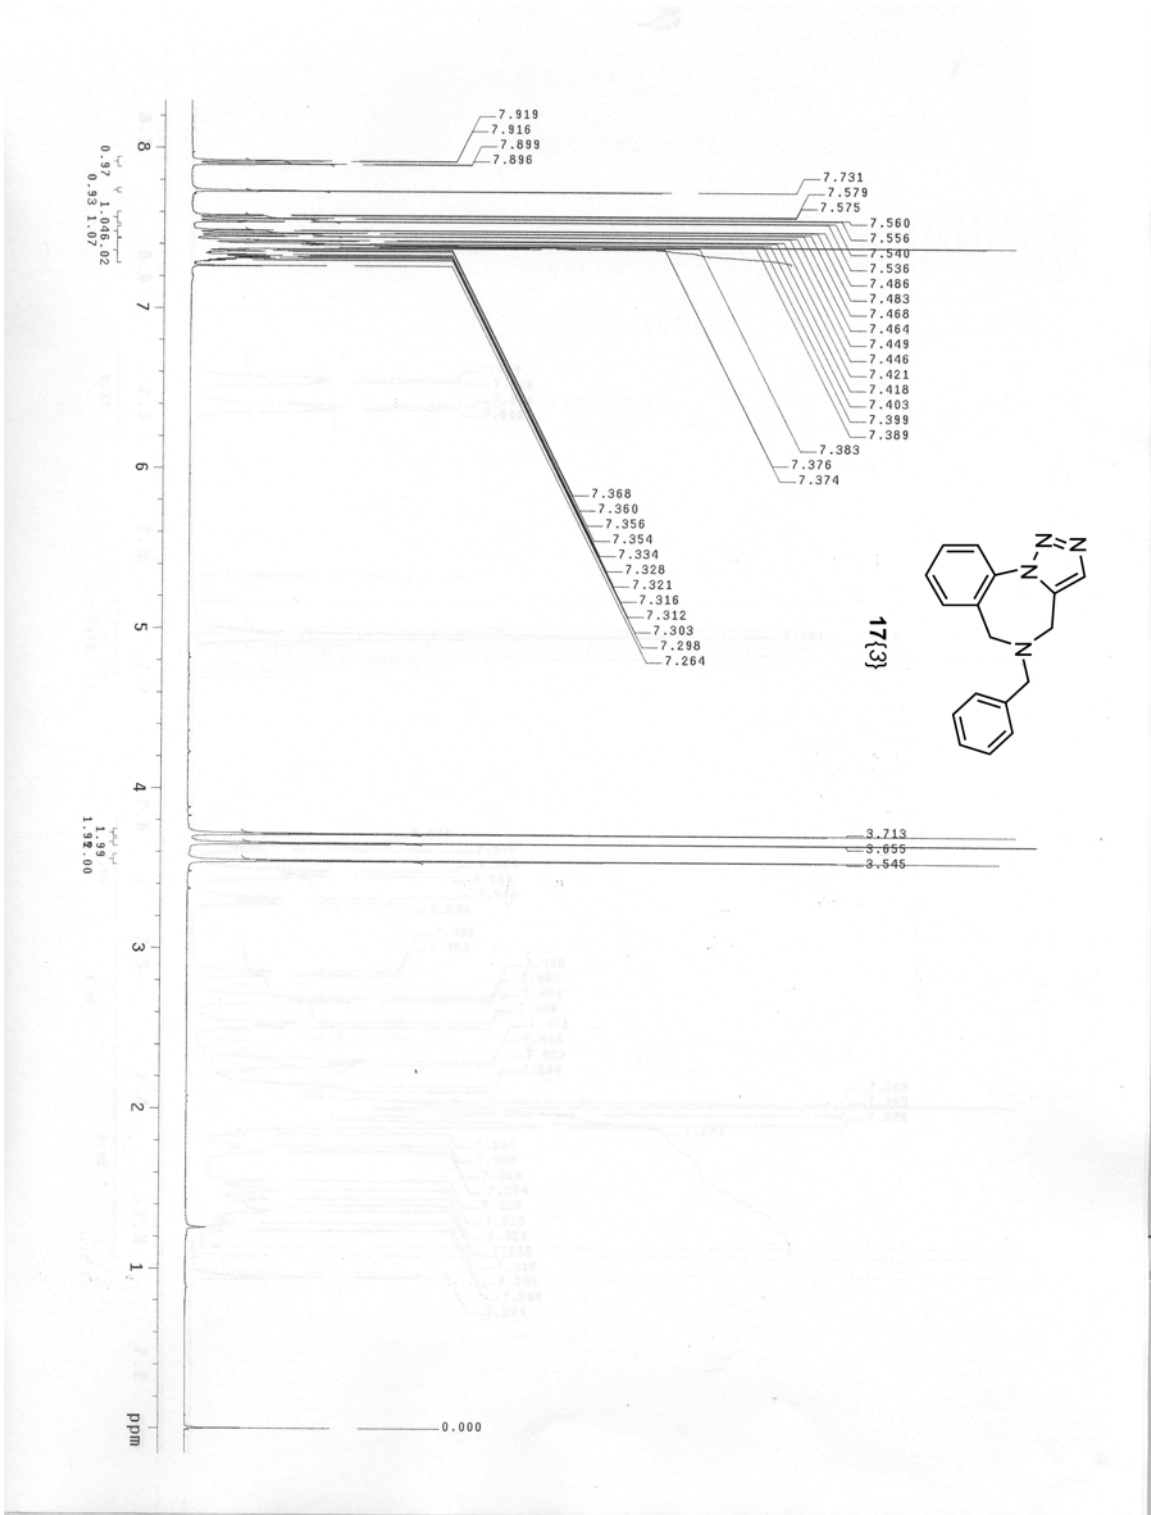

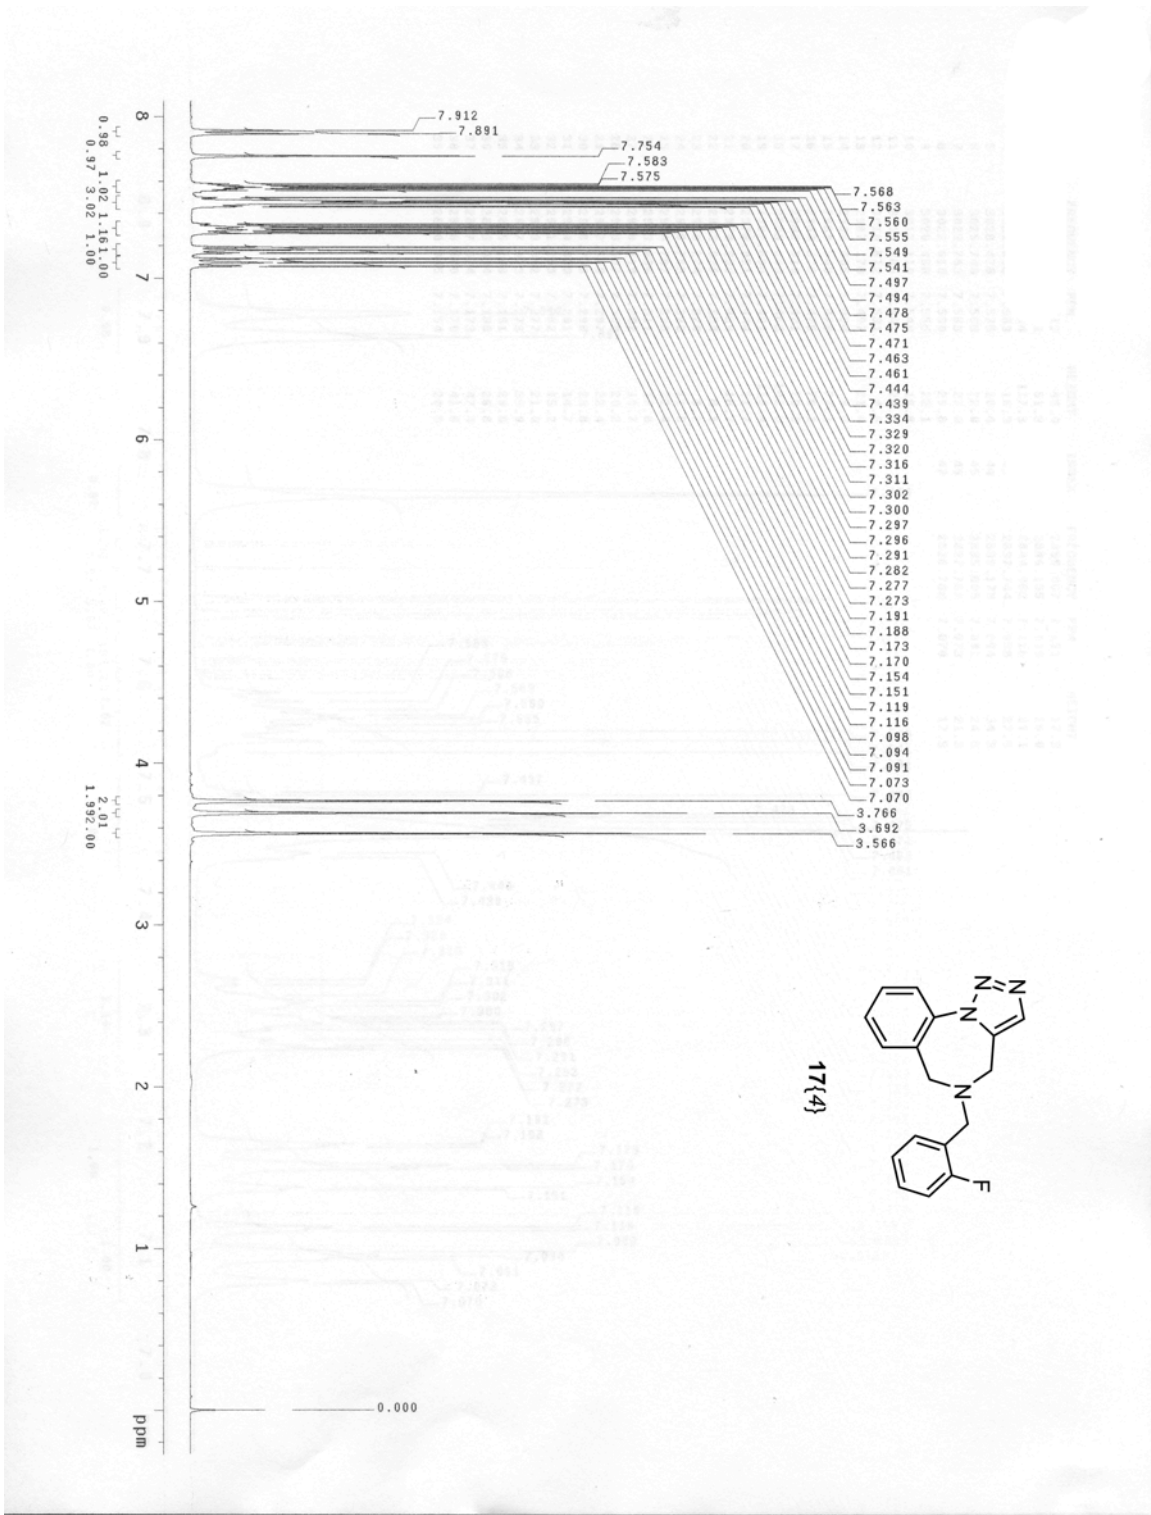



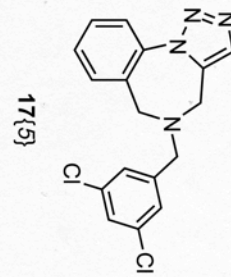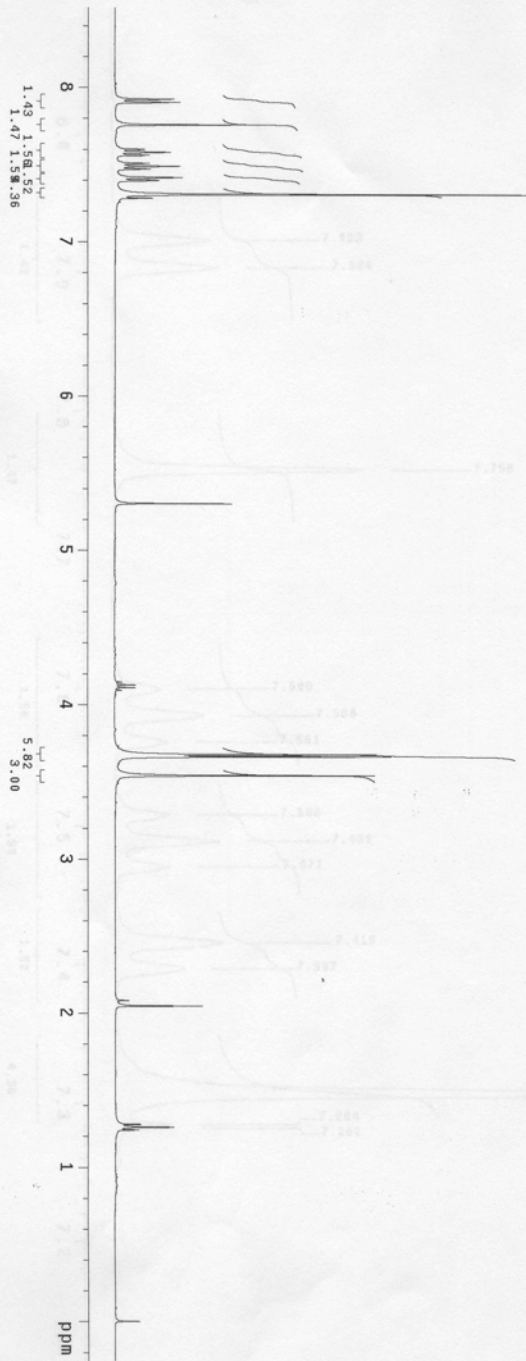

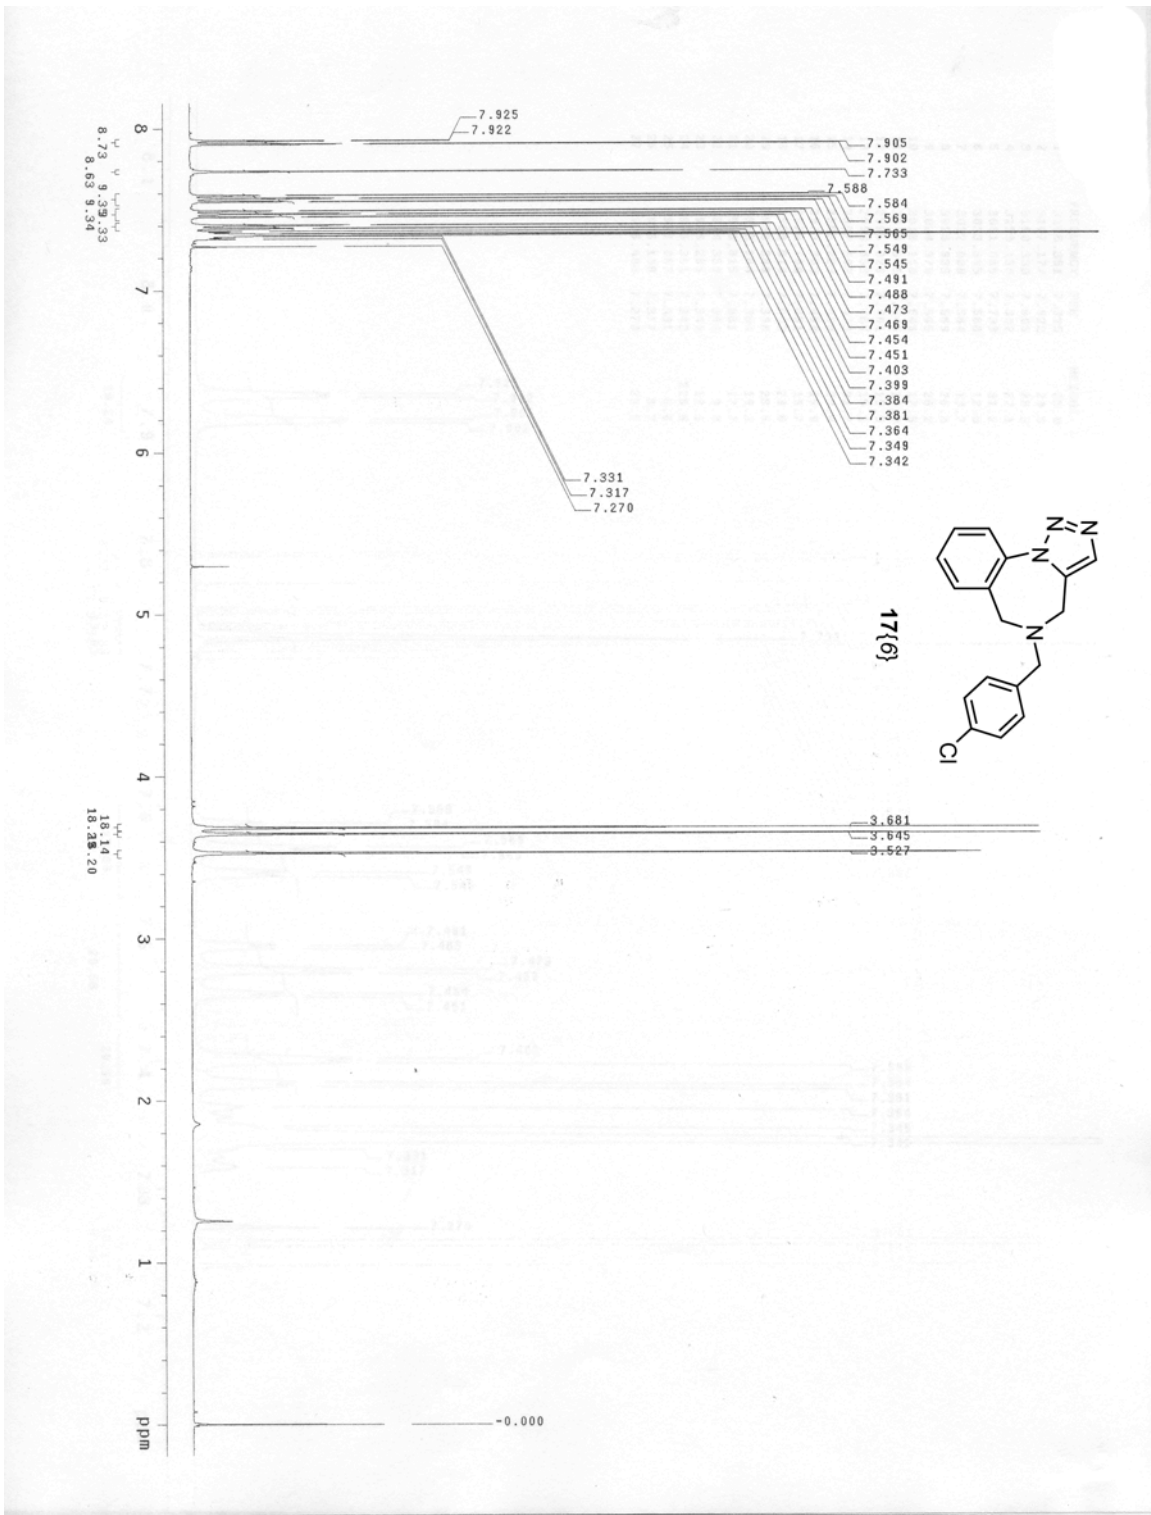

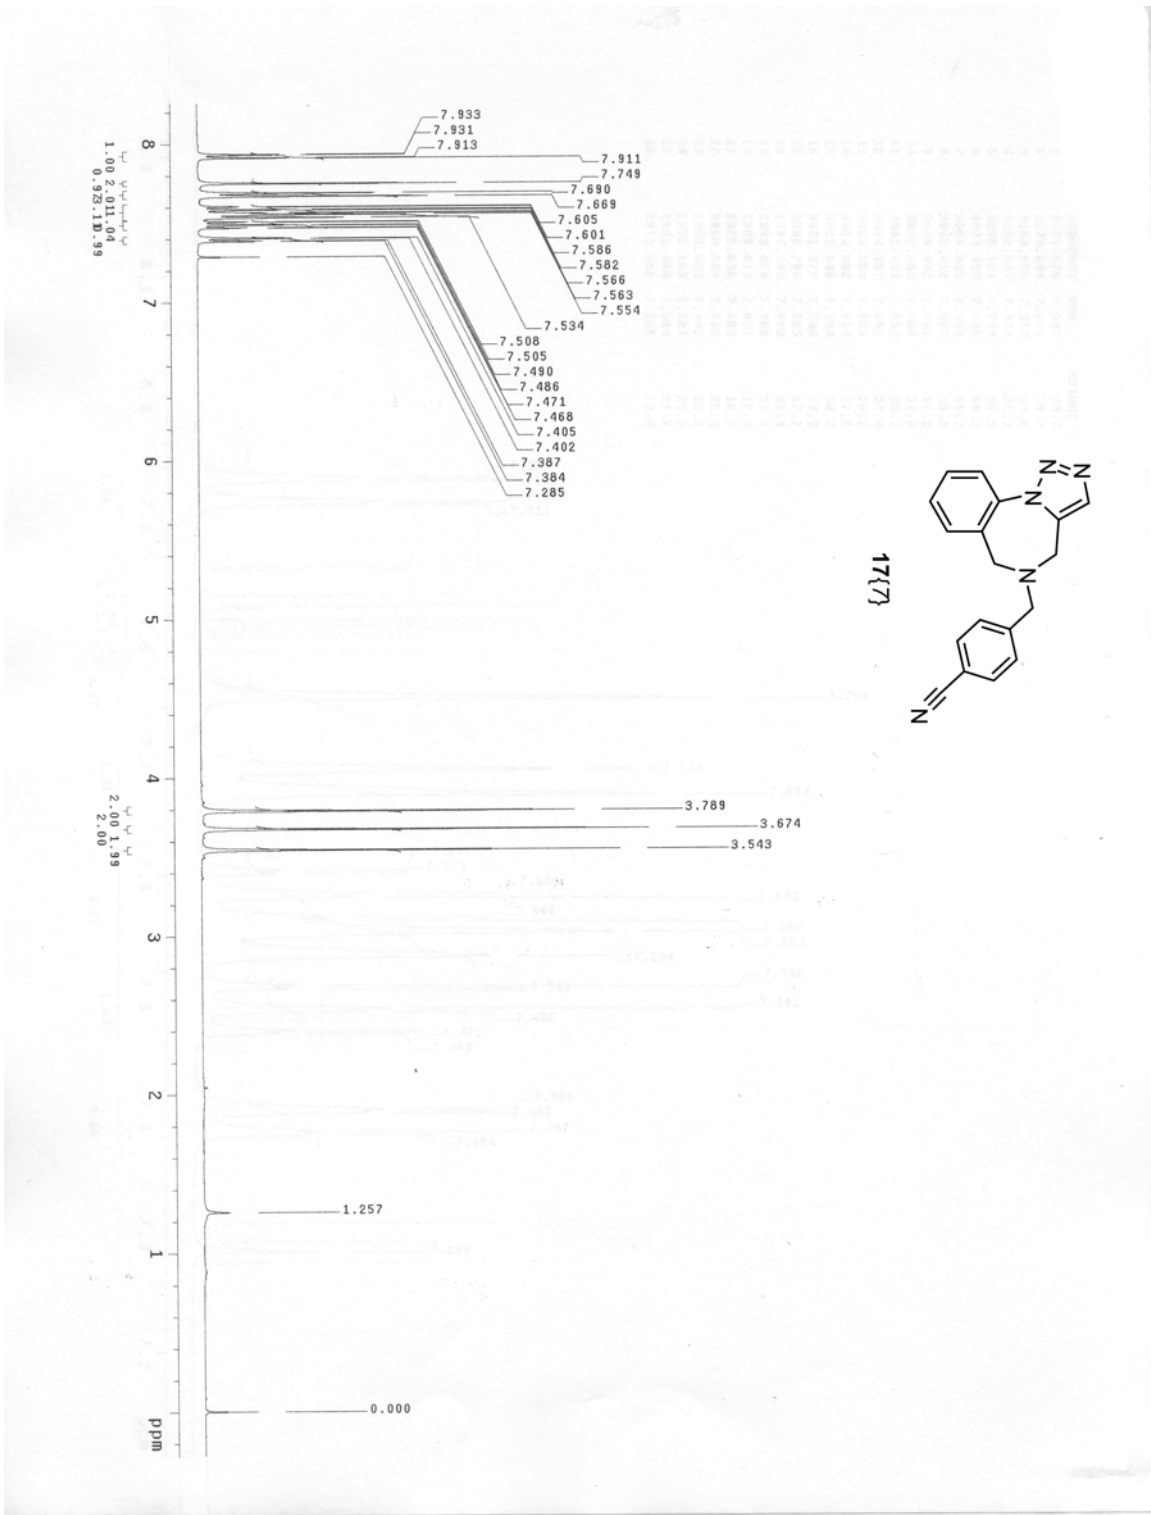

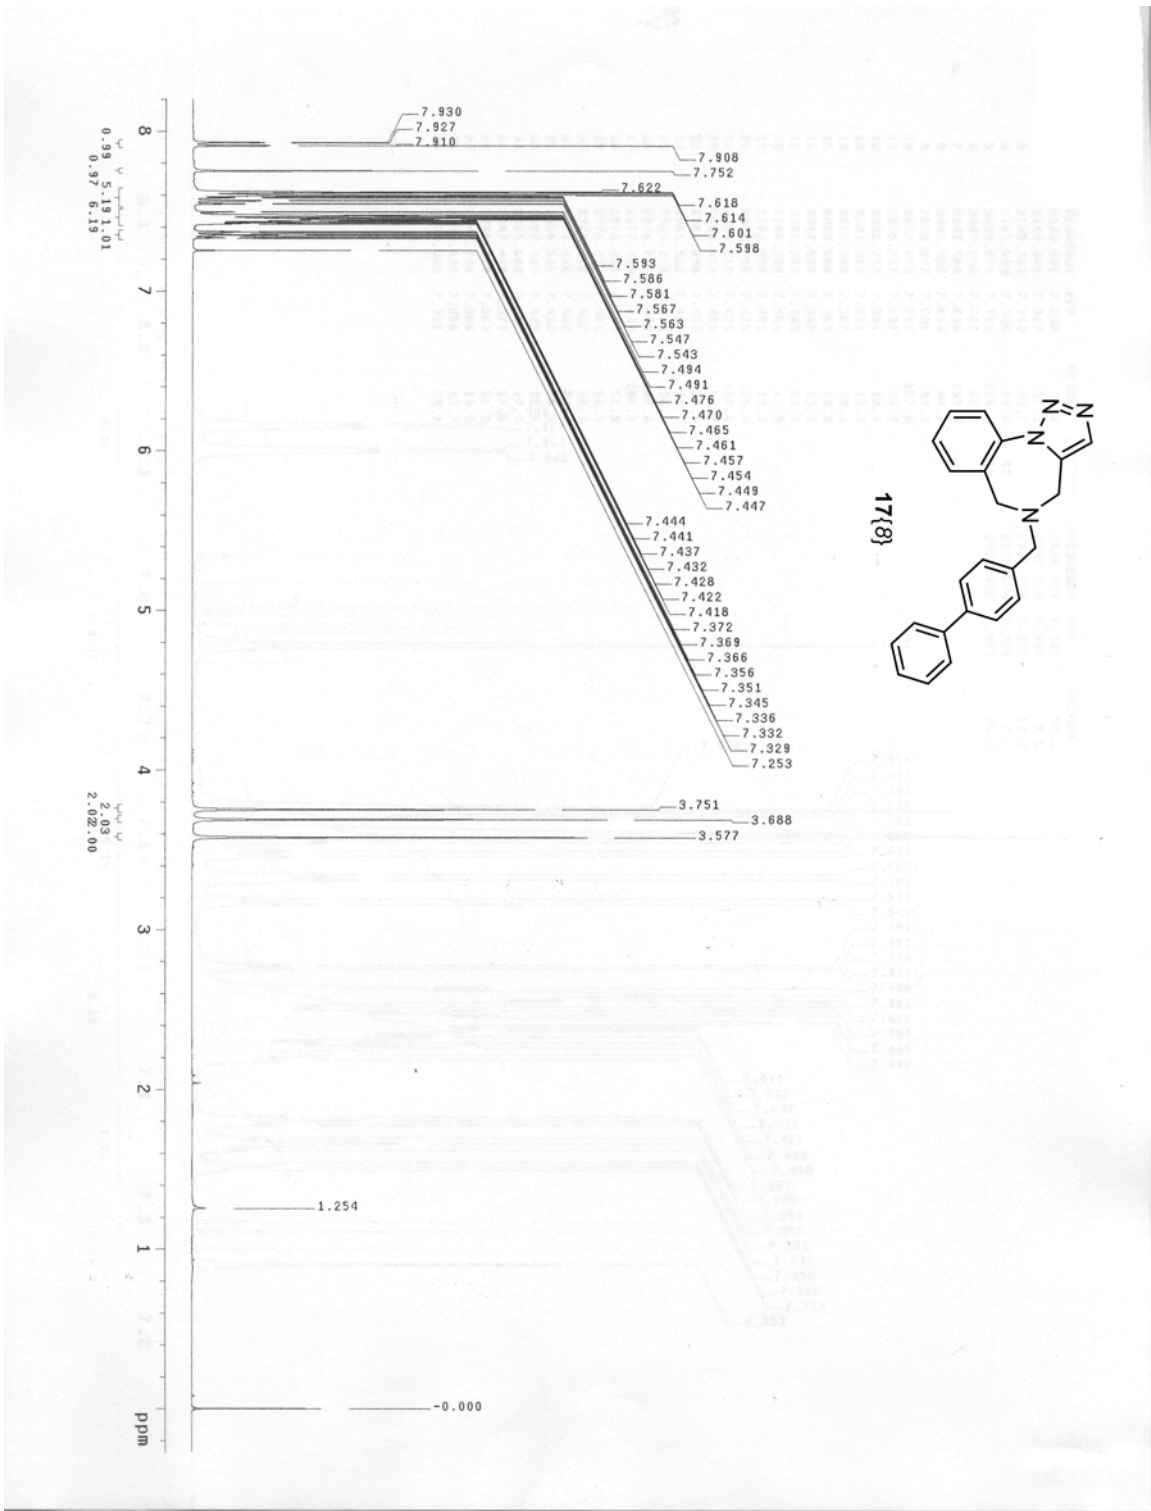

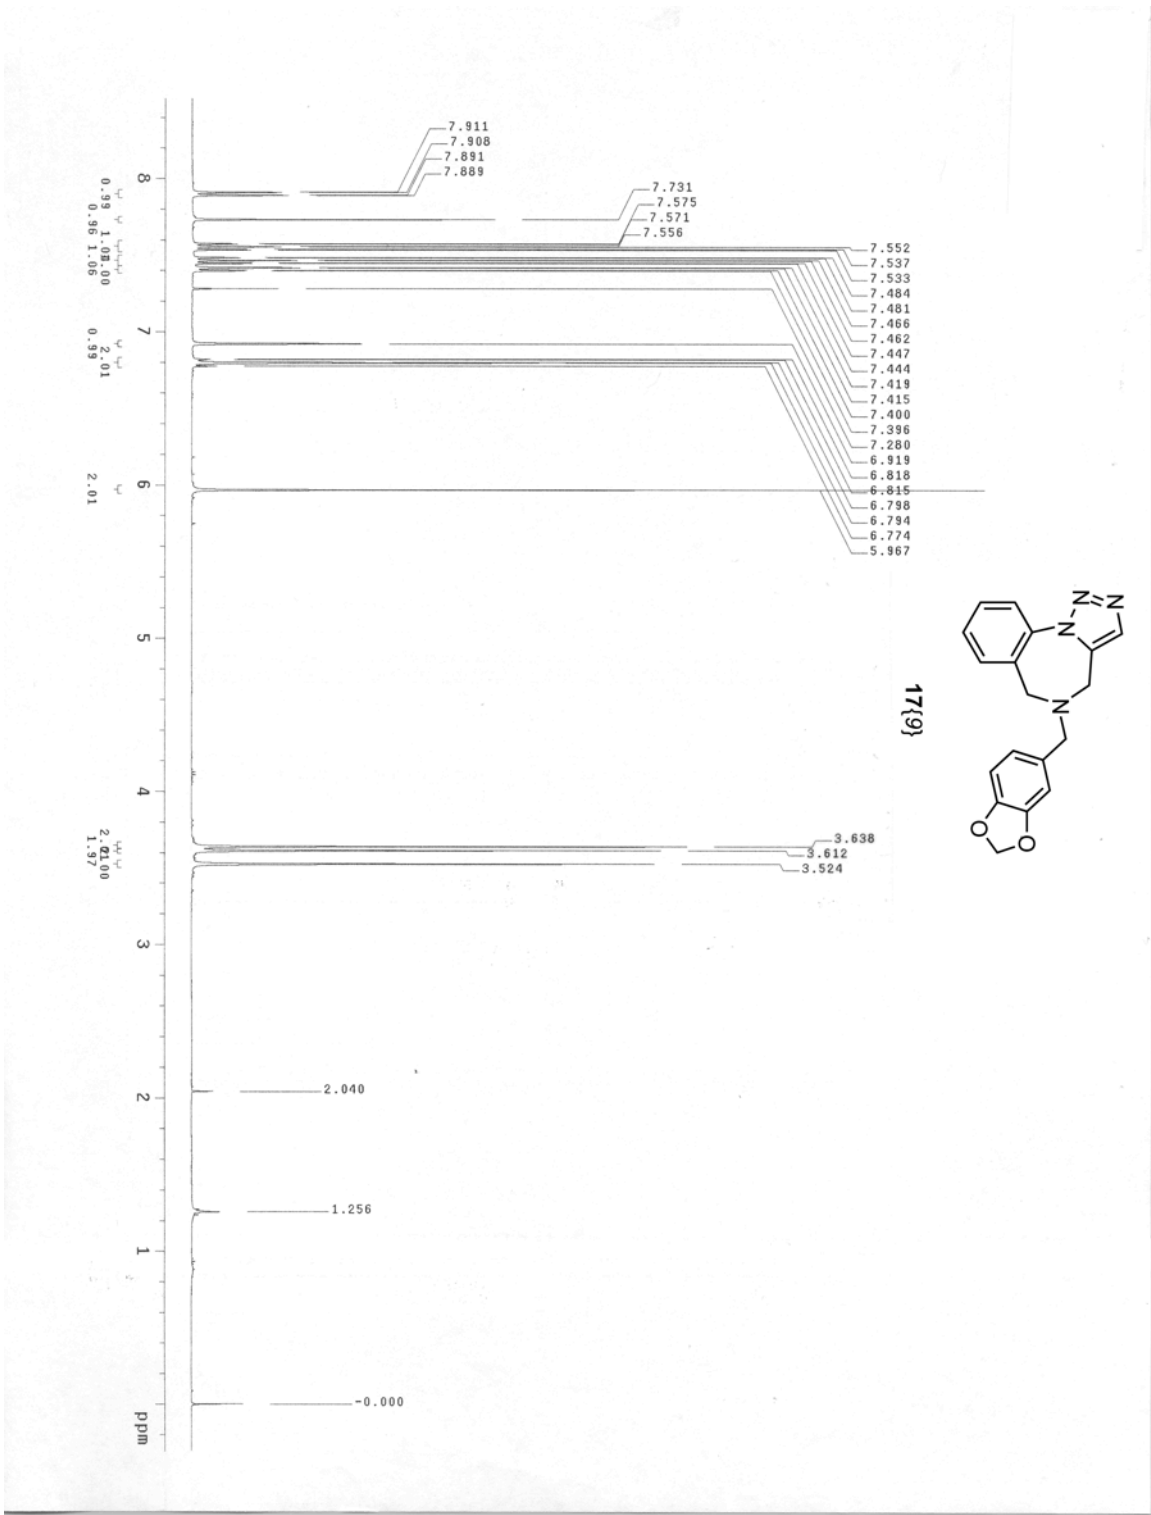

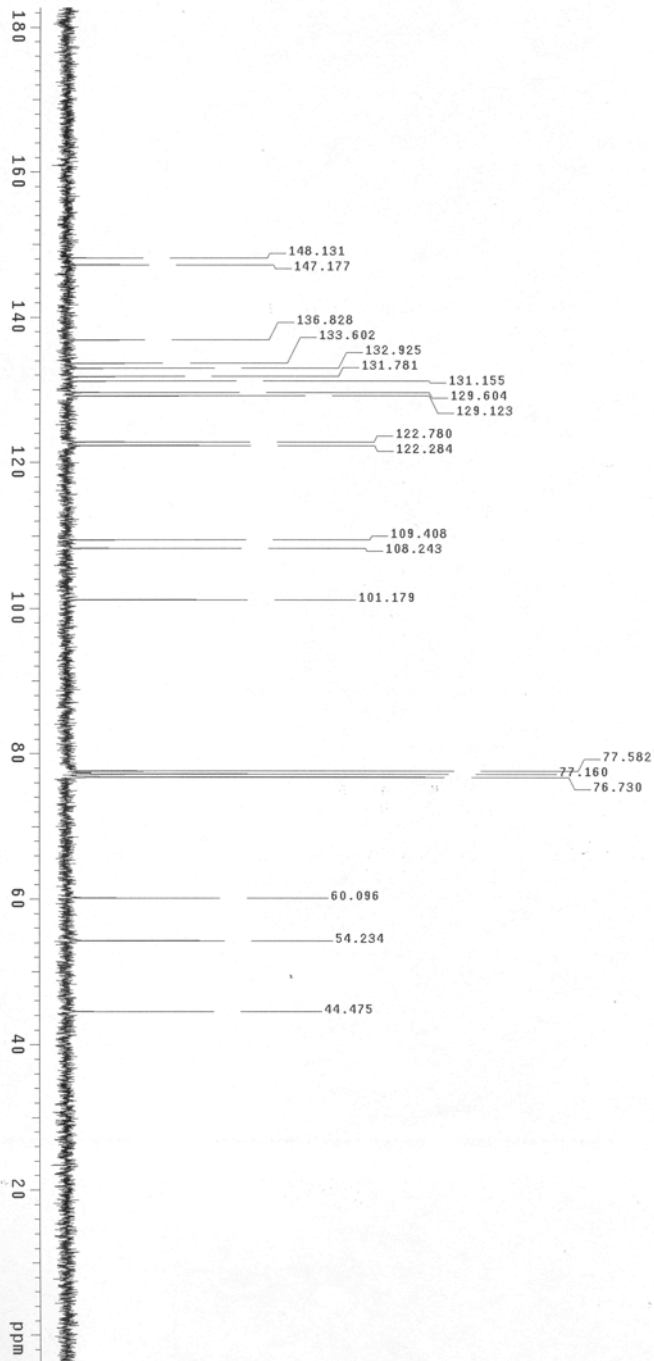

17(9)

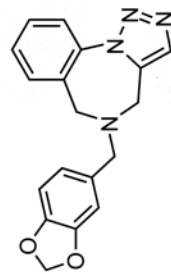

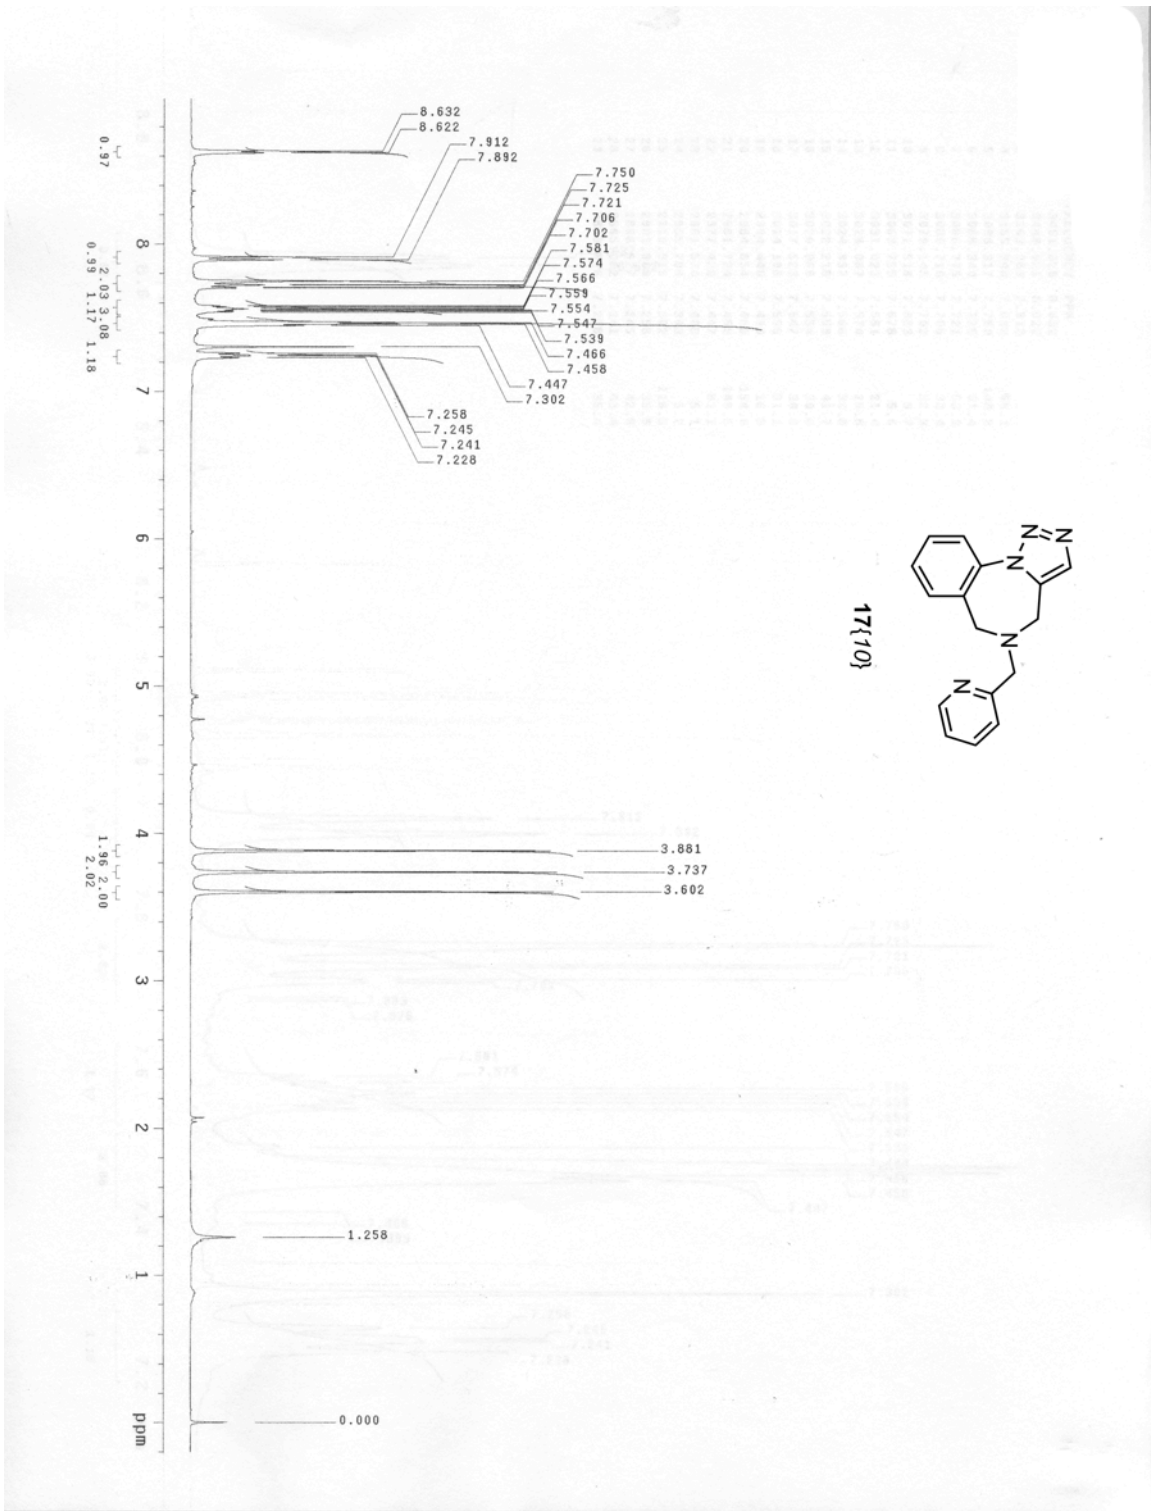

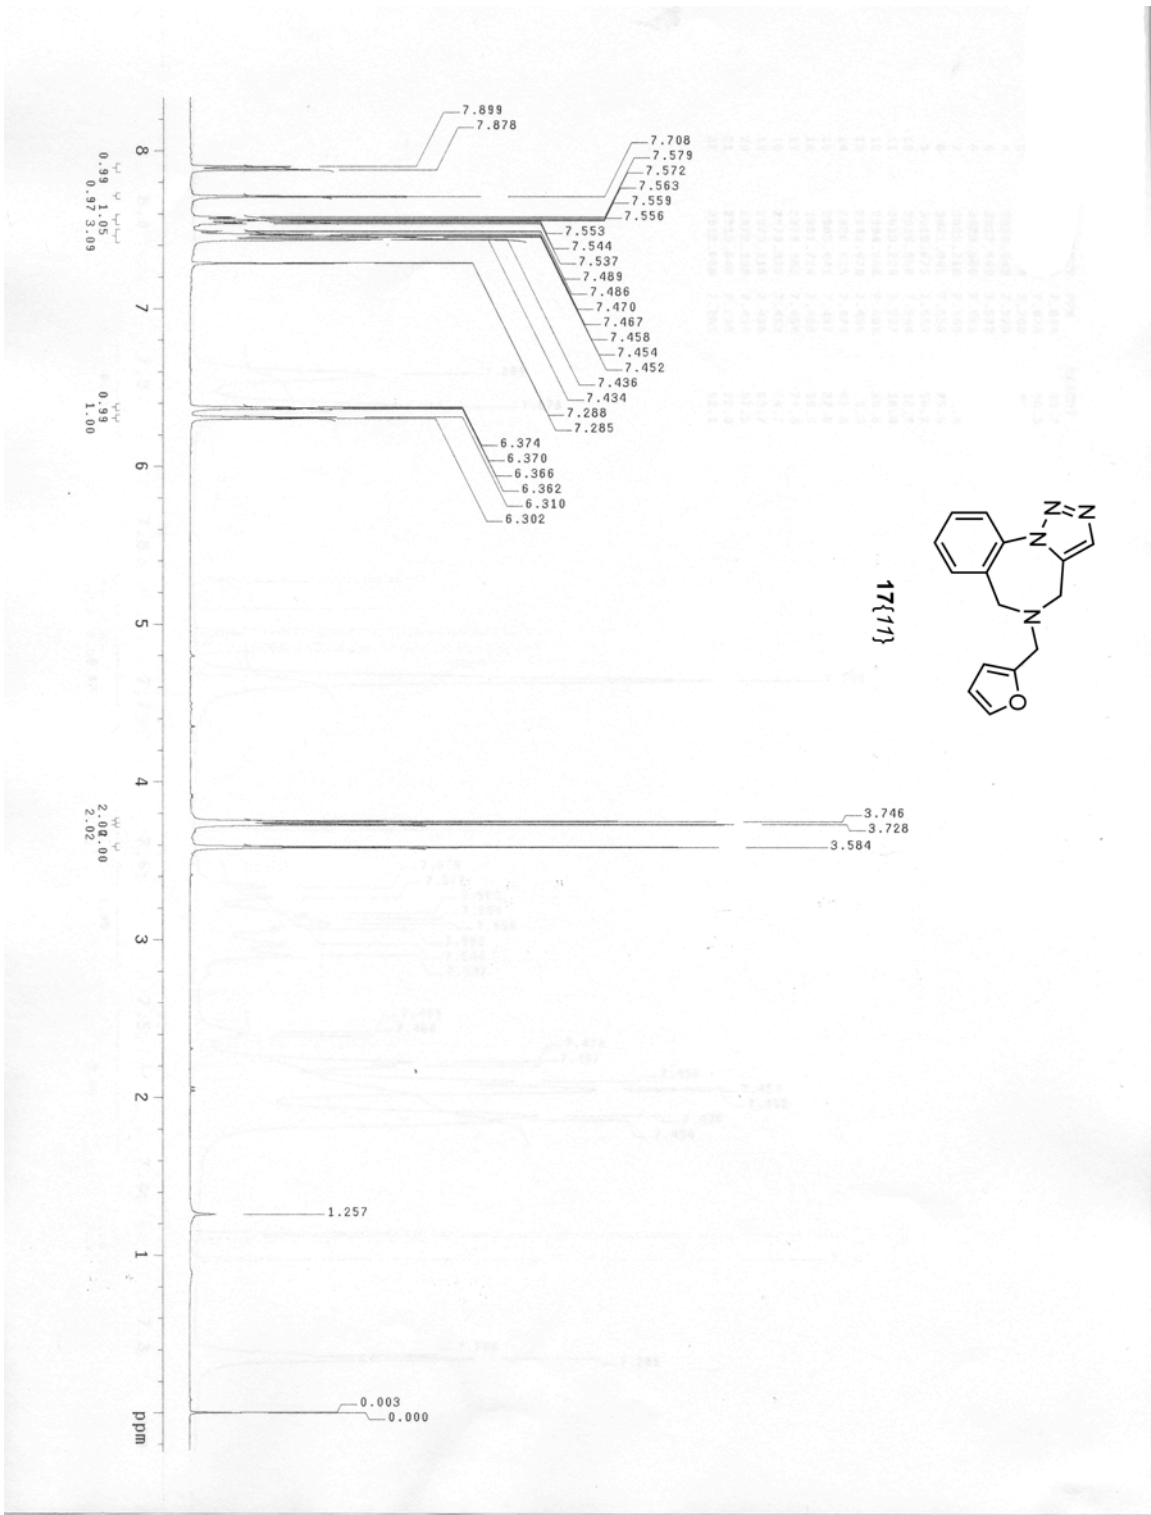



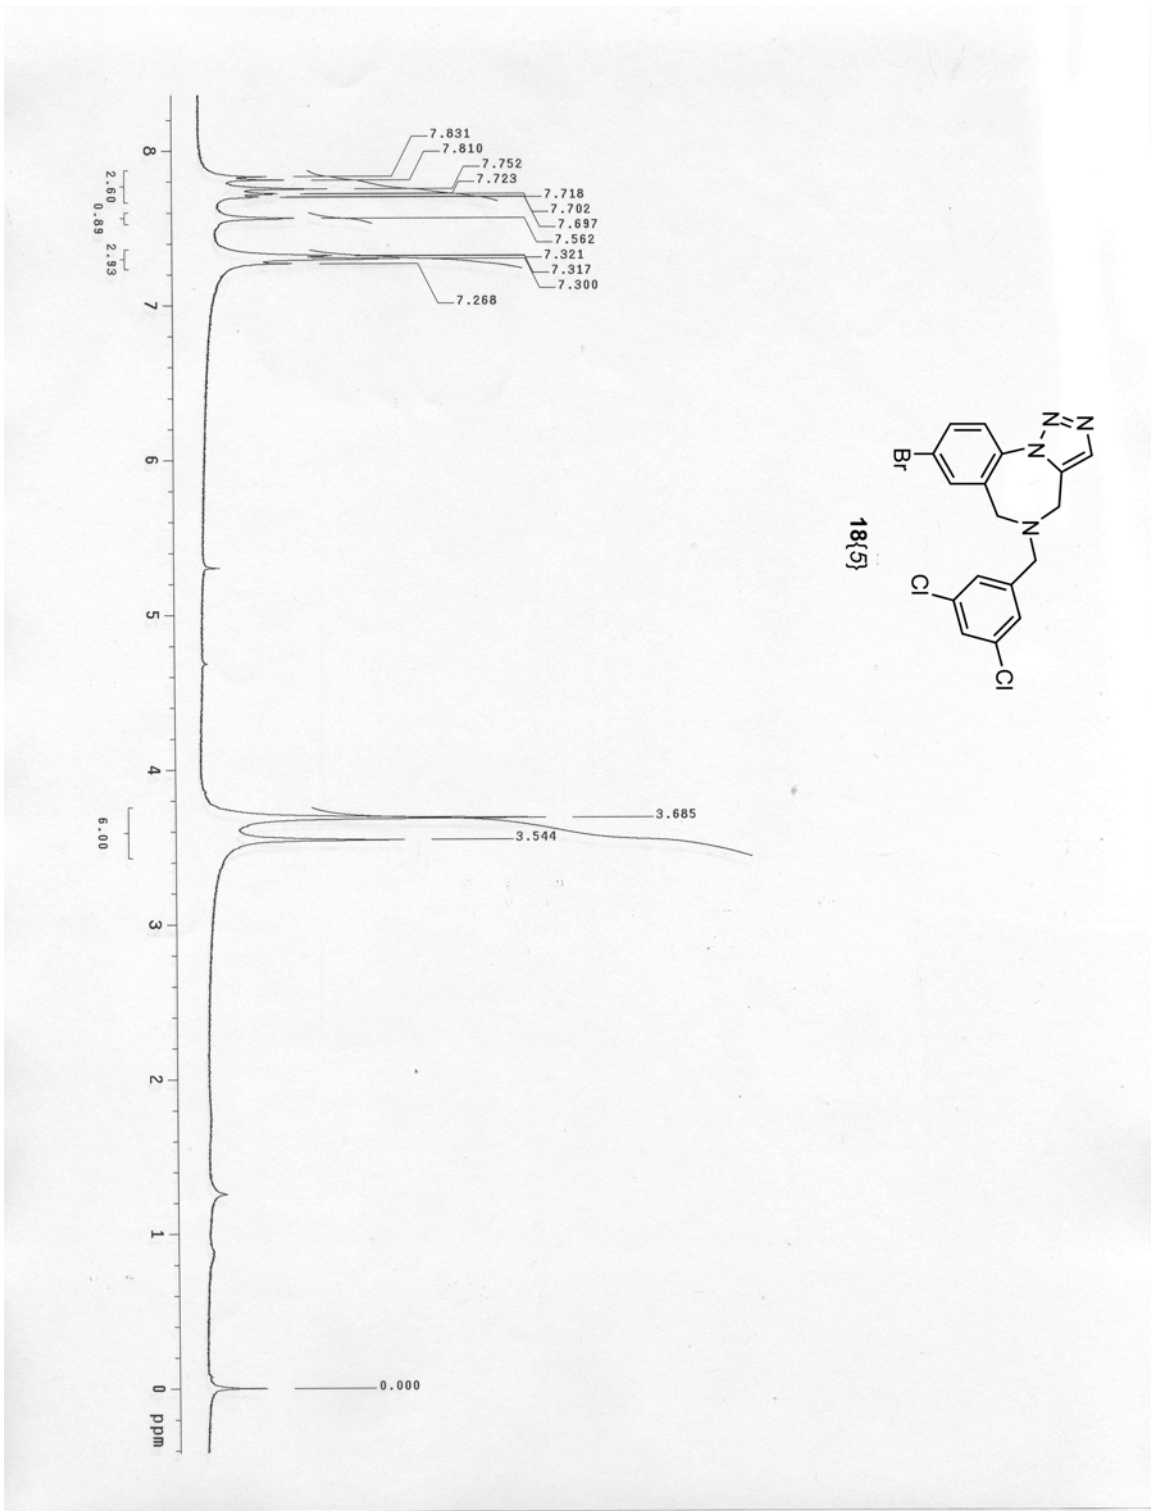

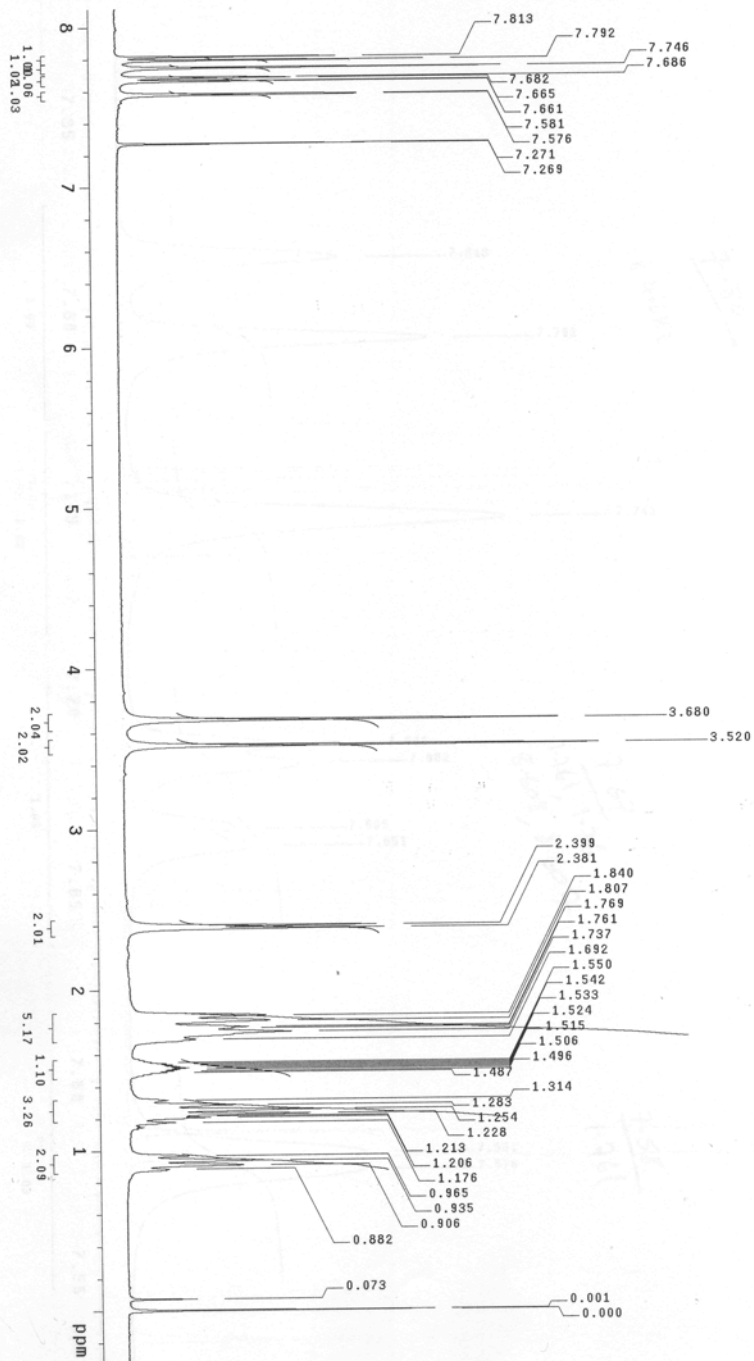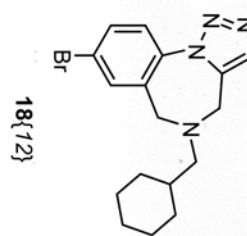

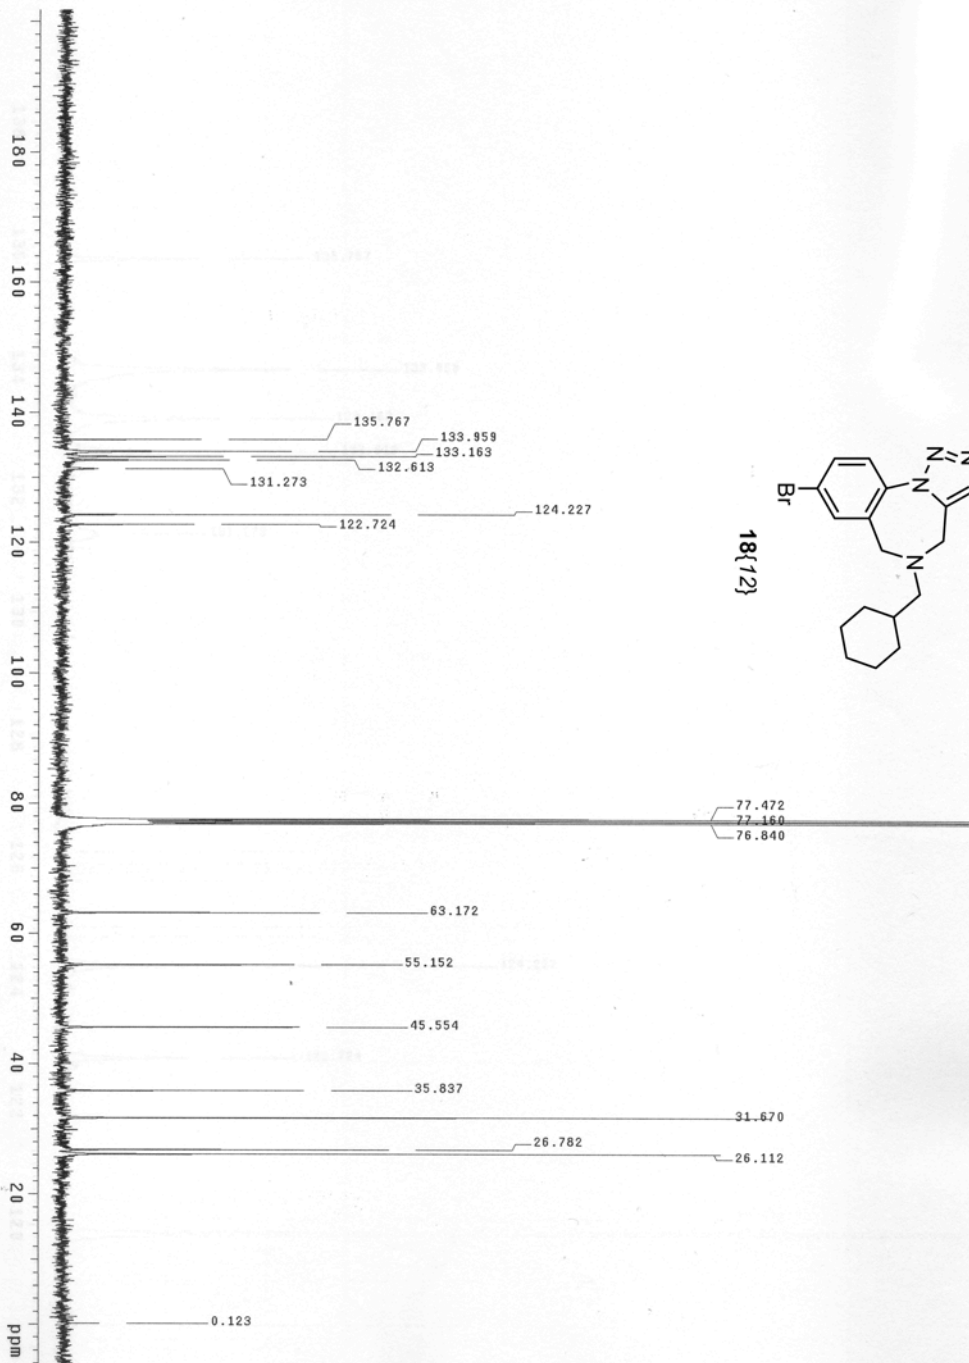

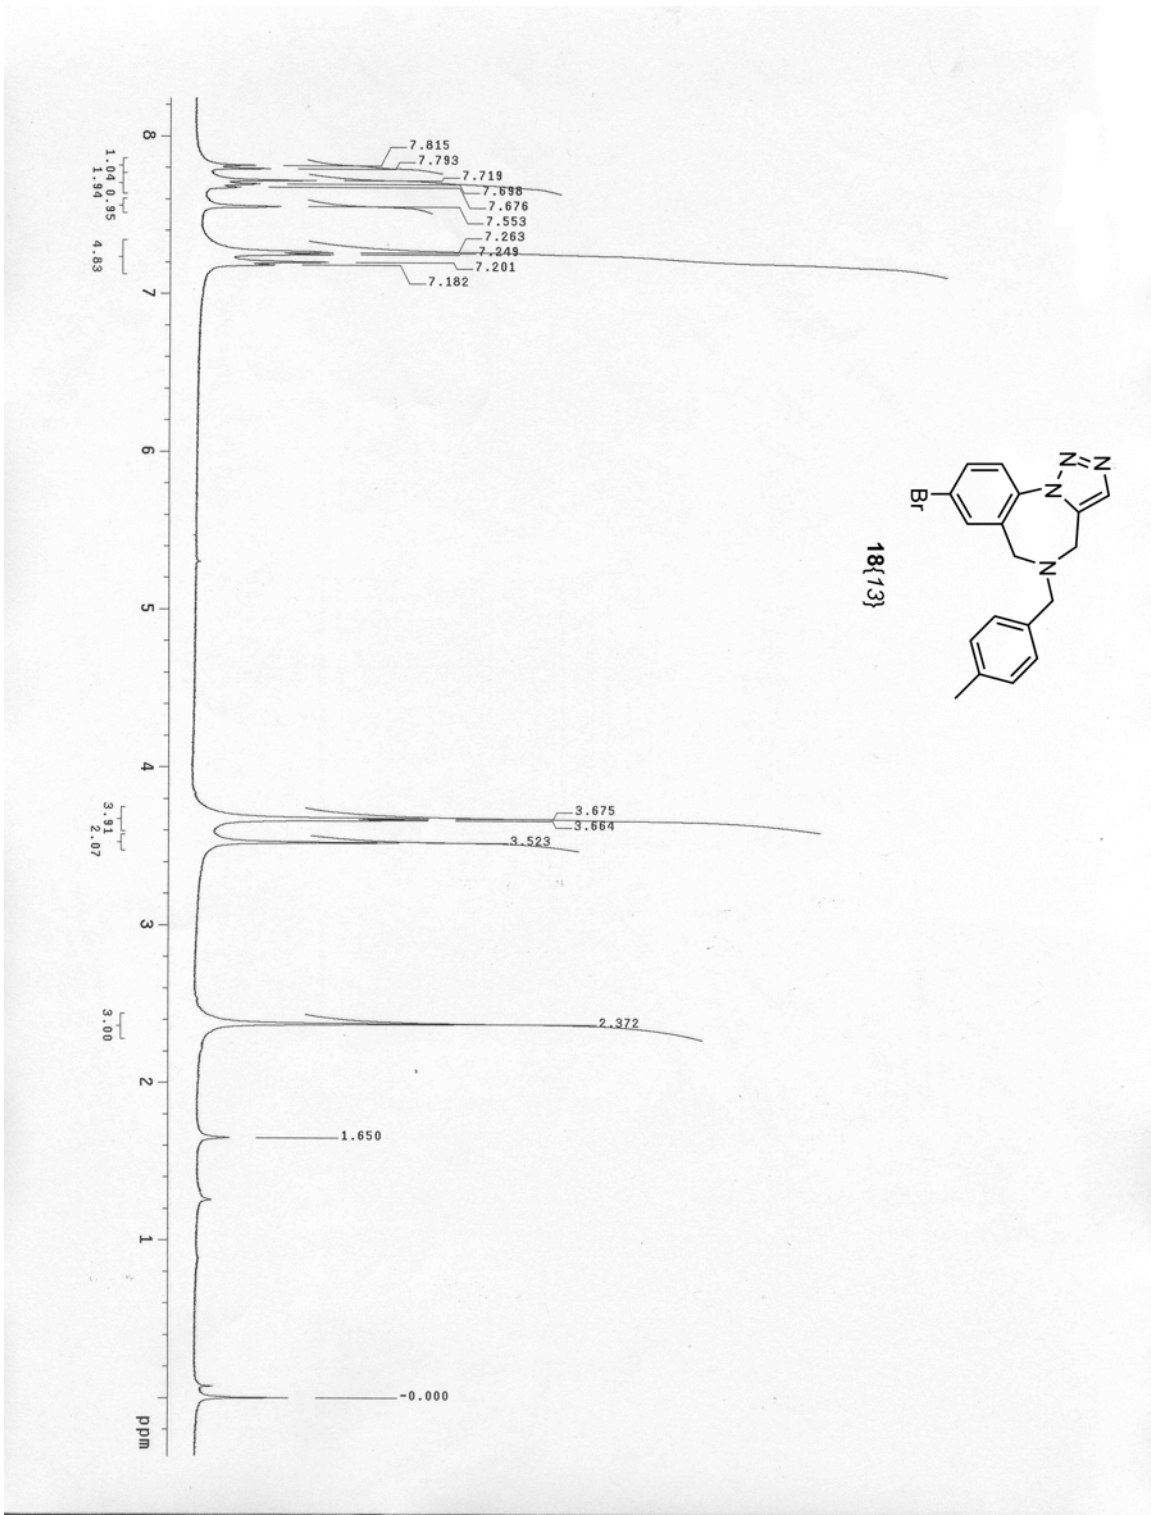

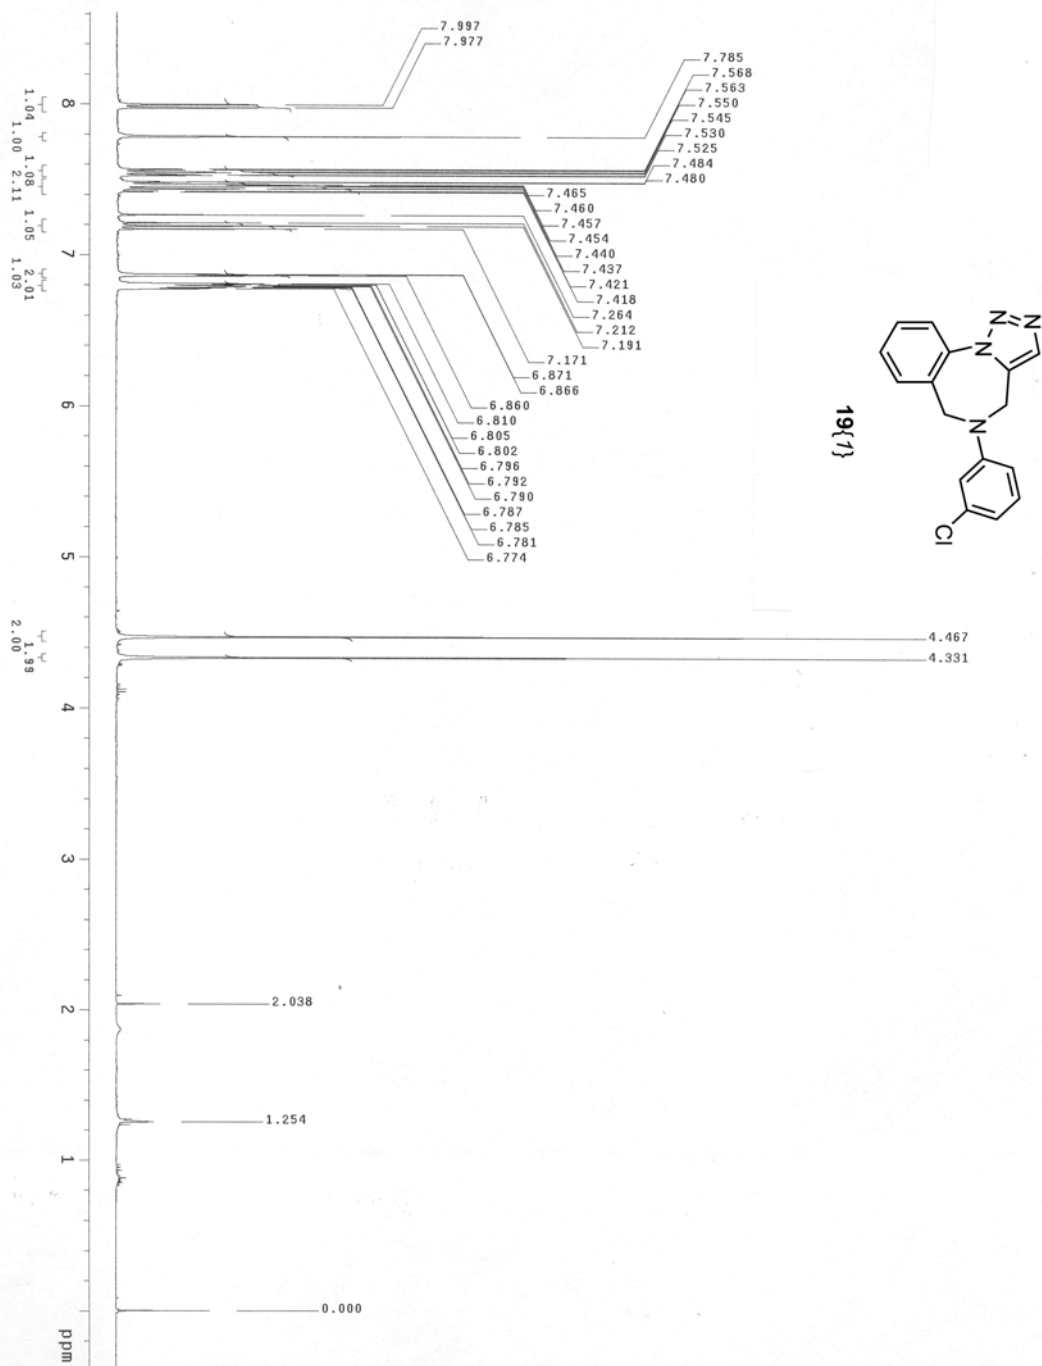

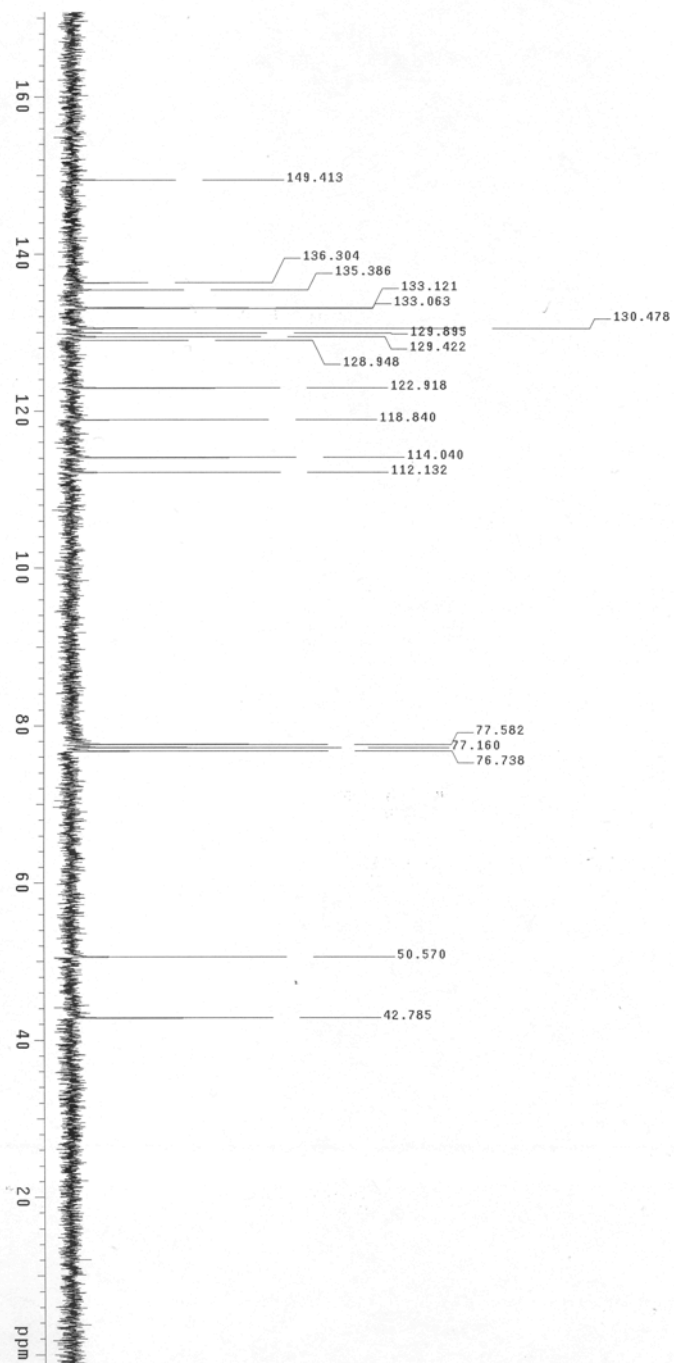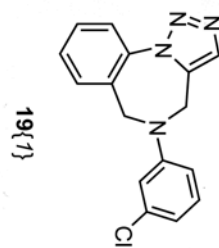

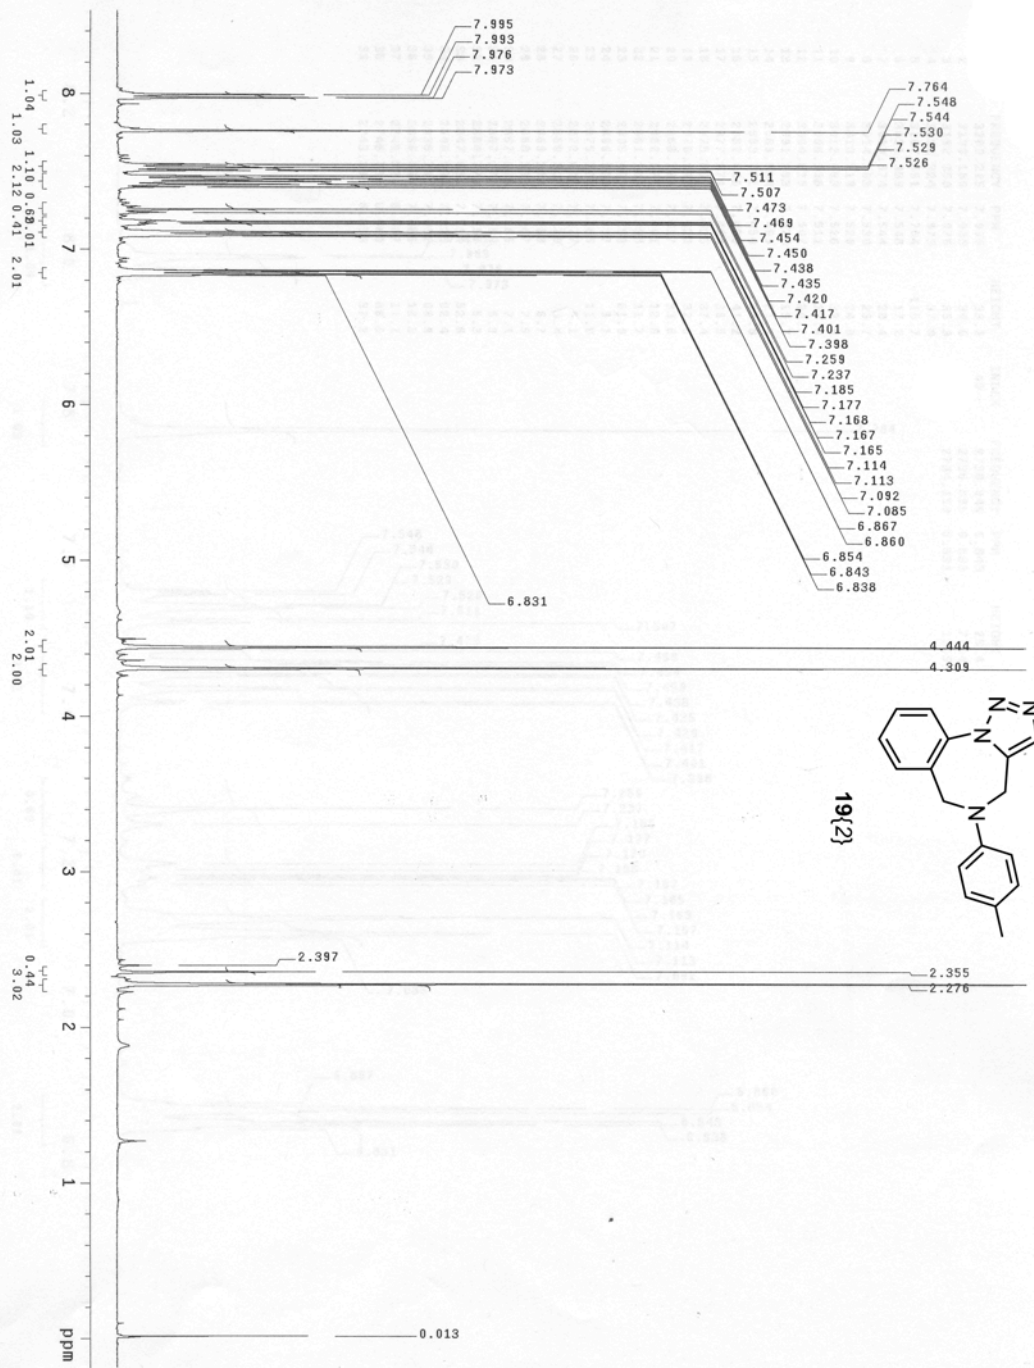

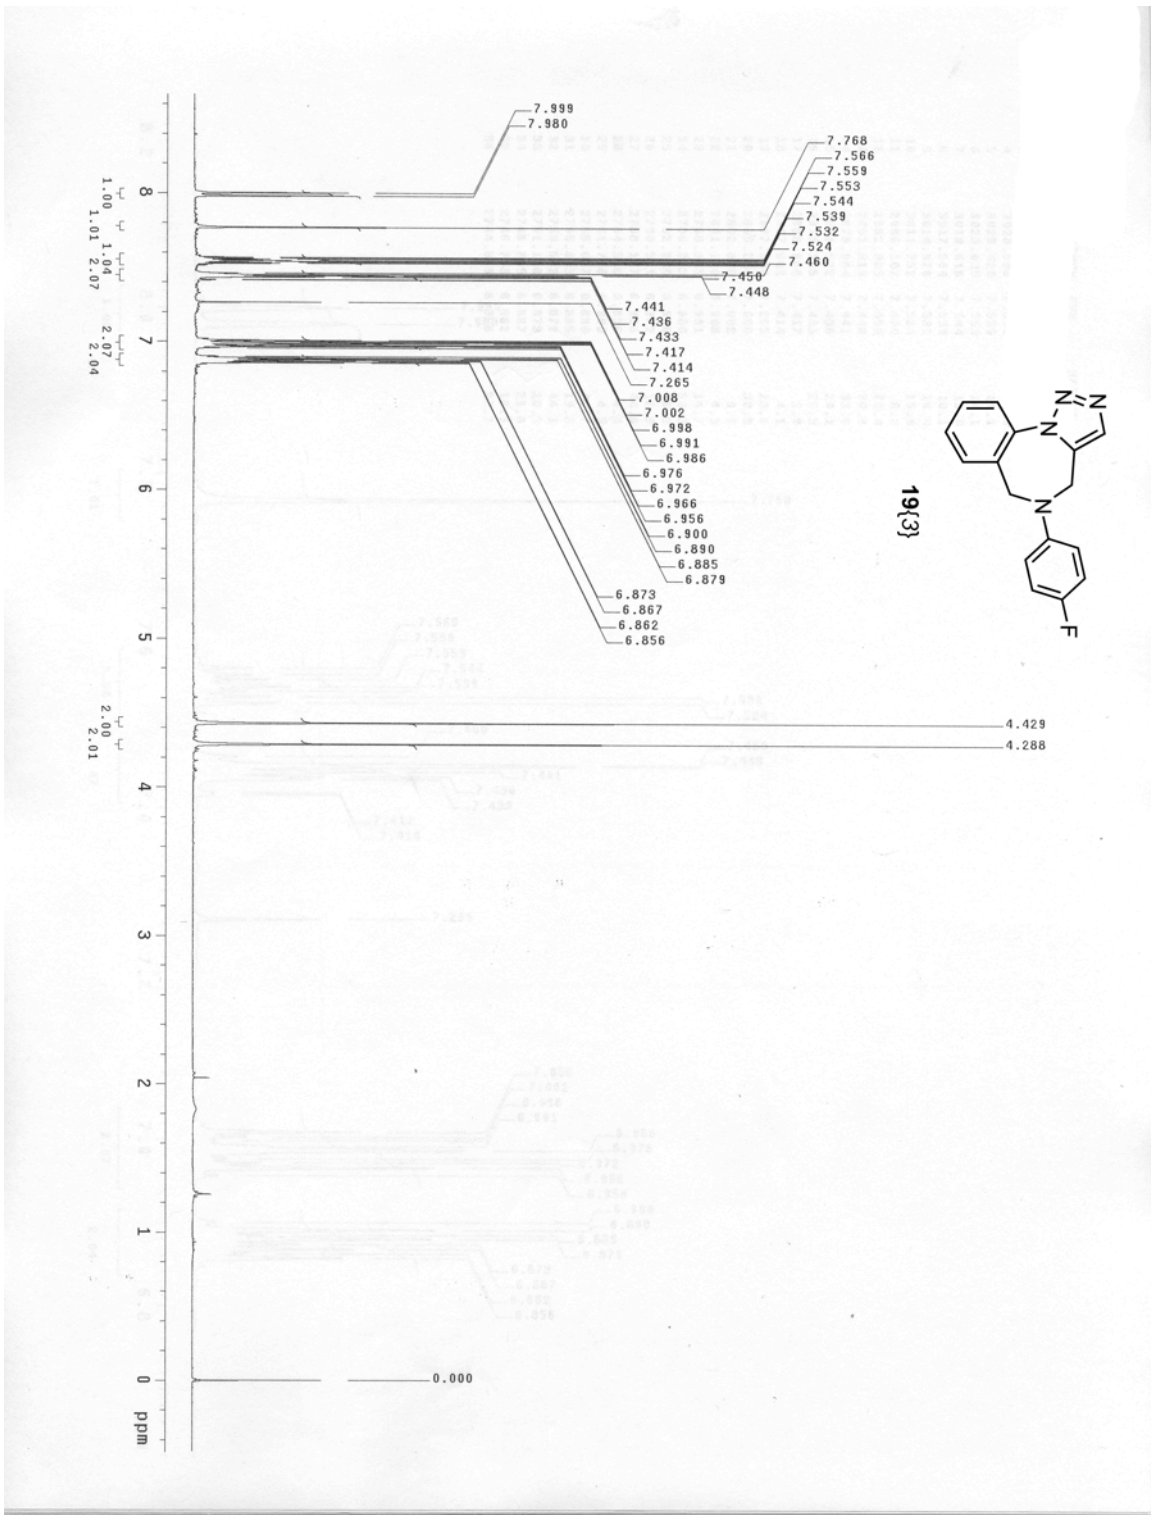



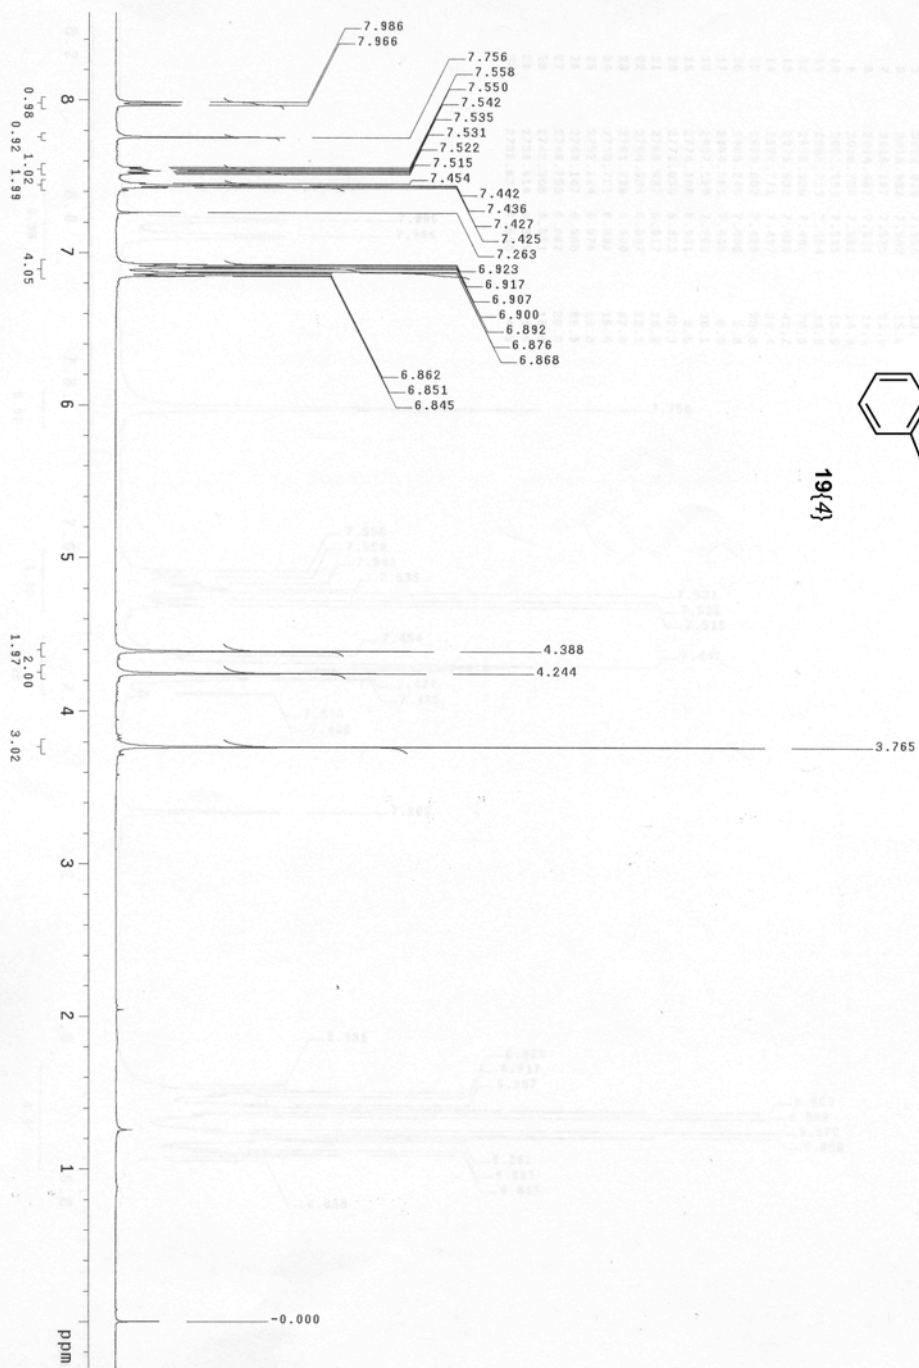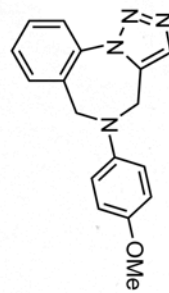

19(4)

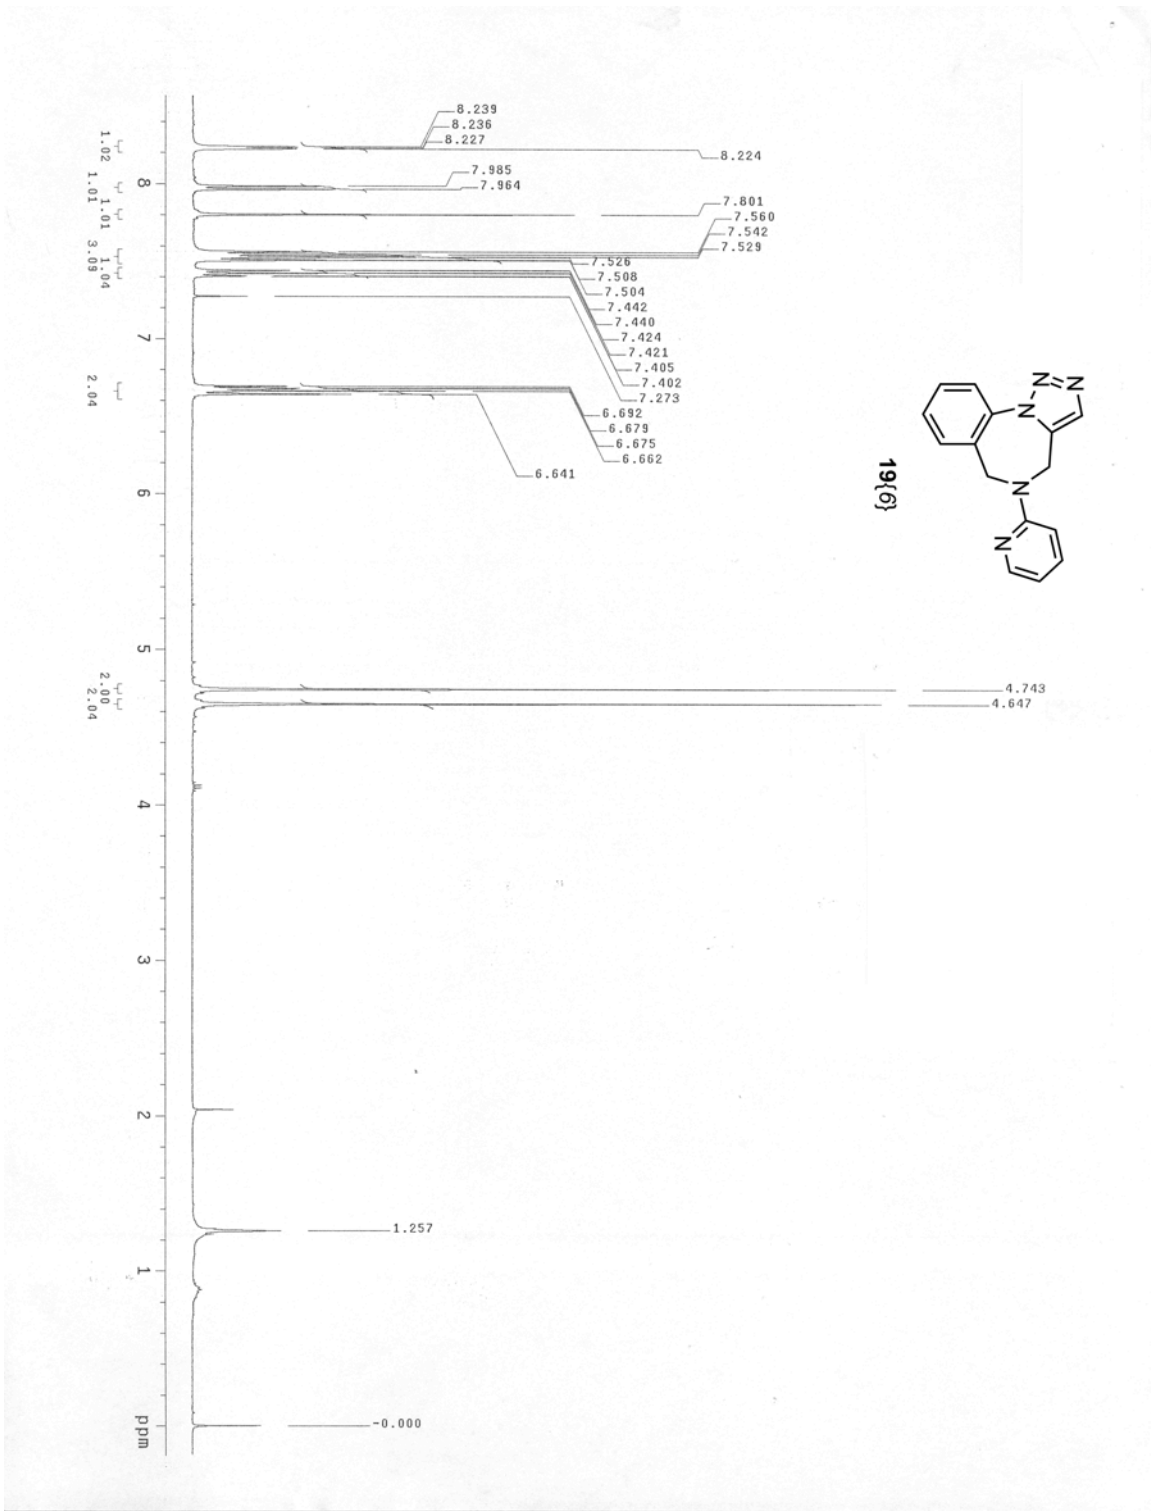

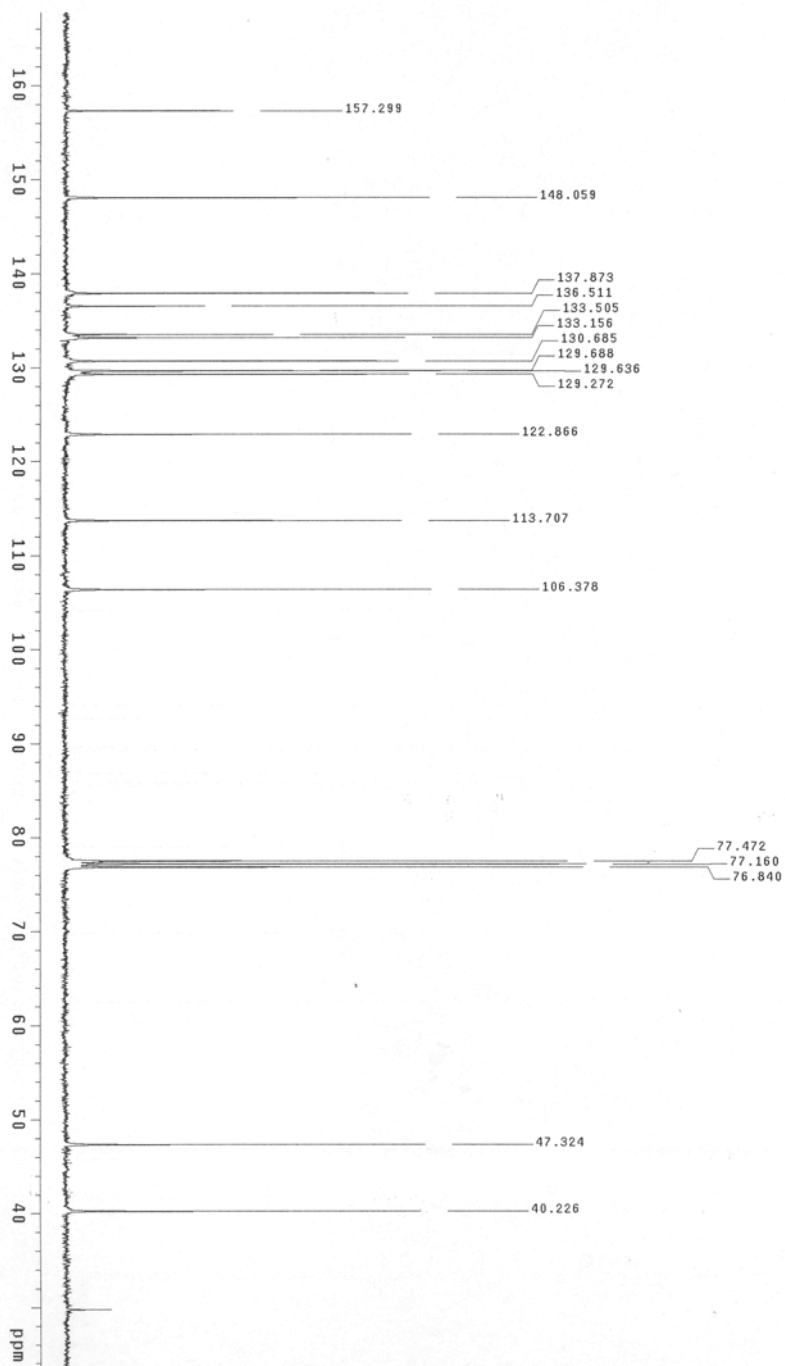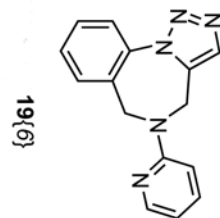

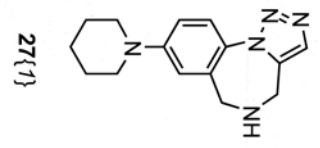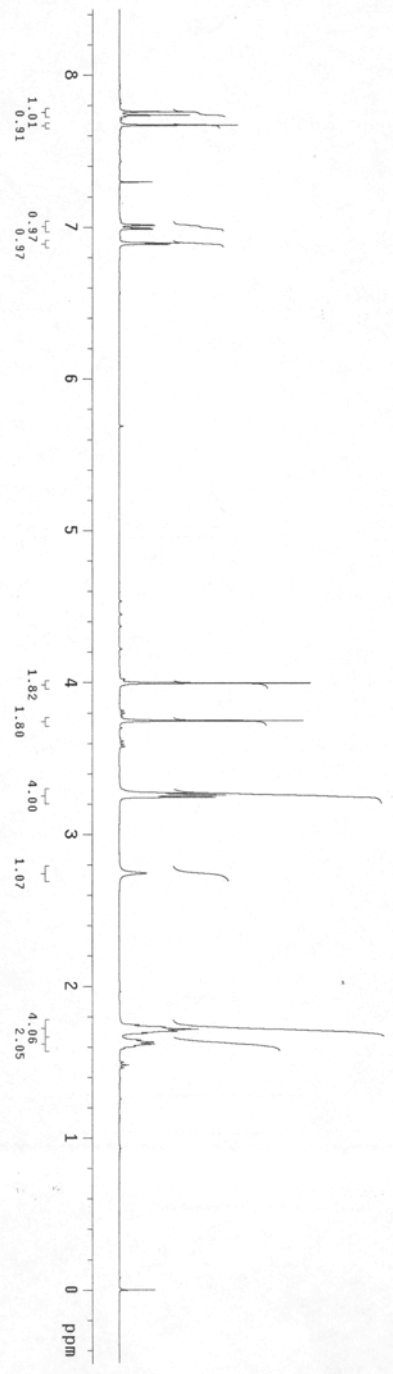

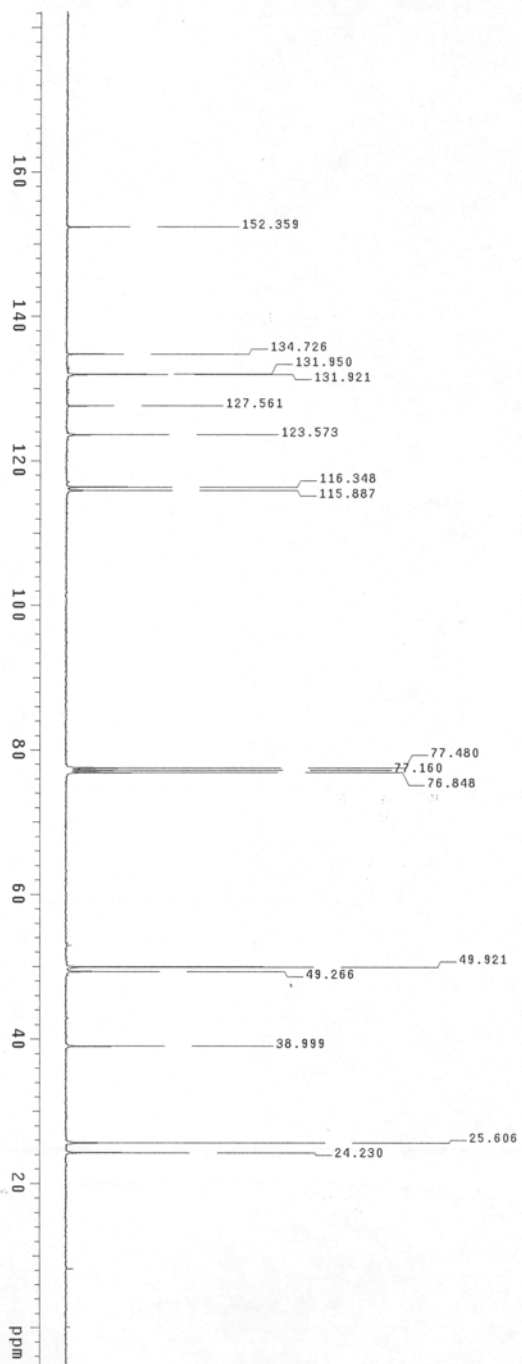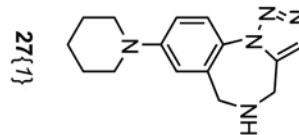

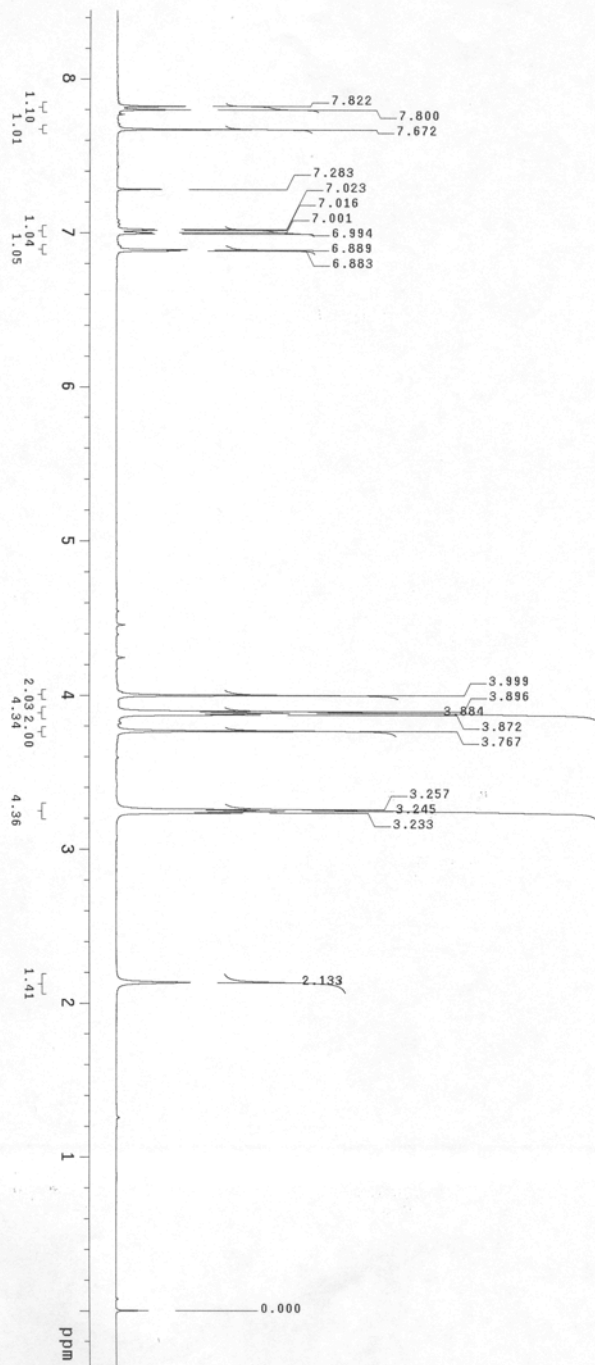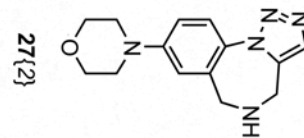

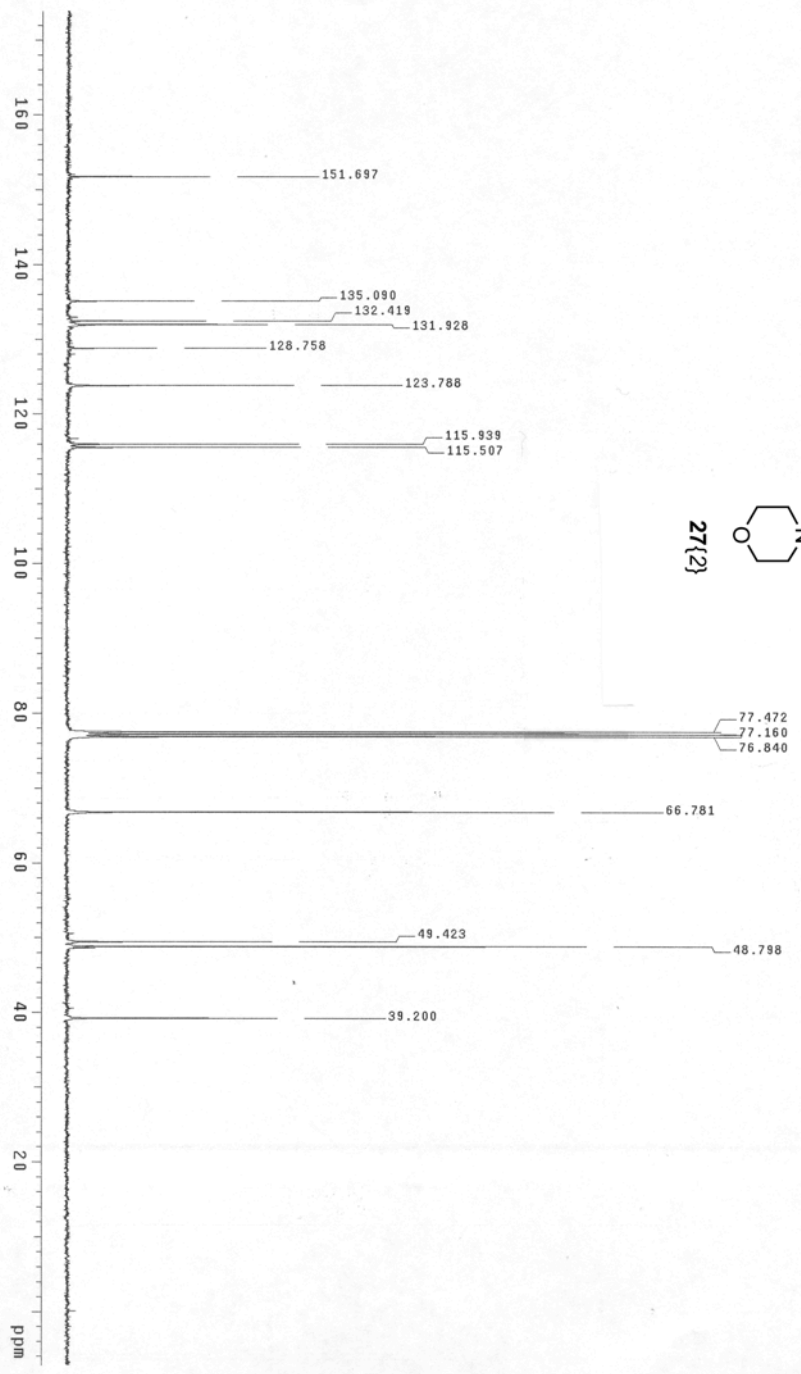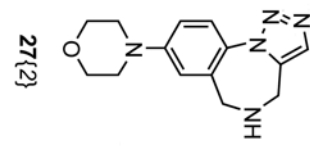

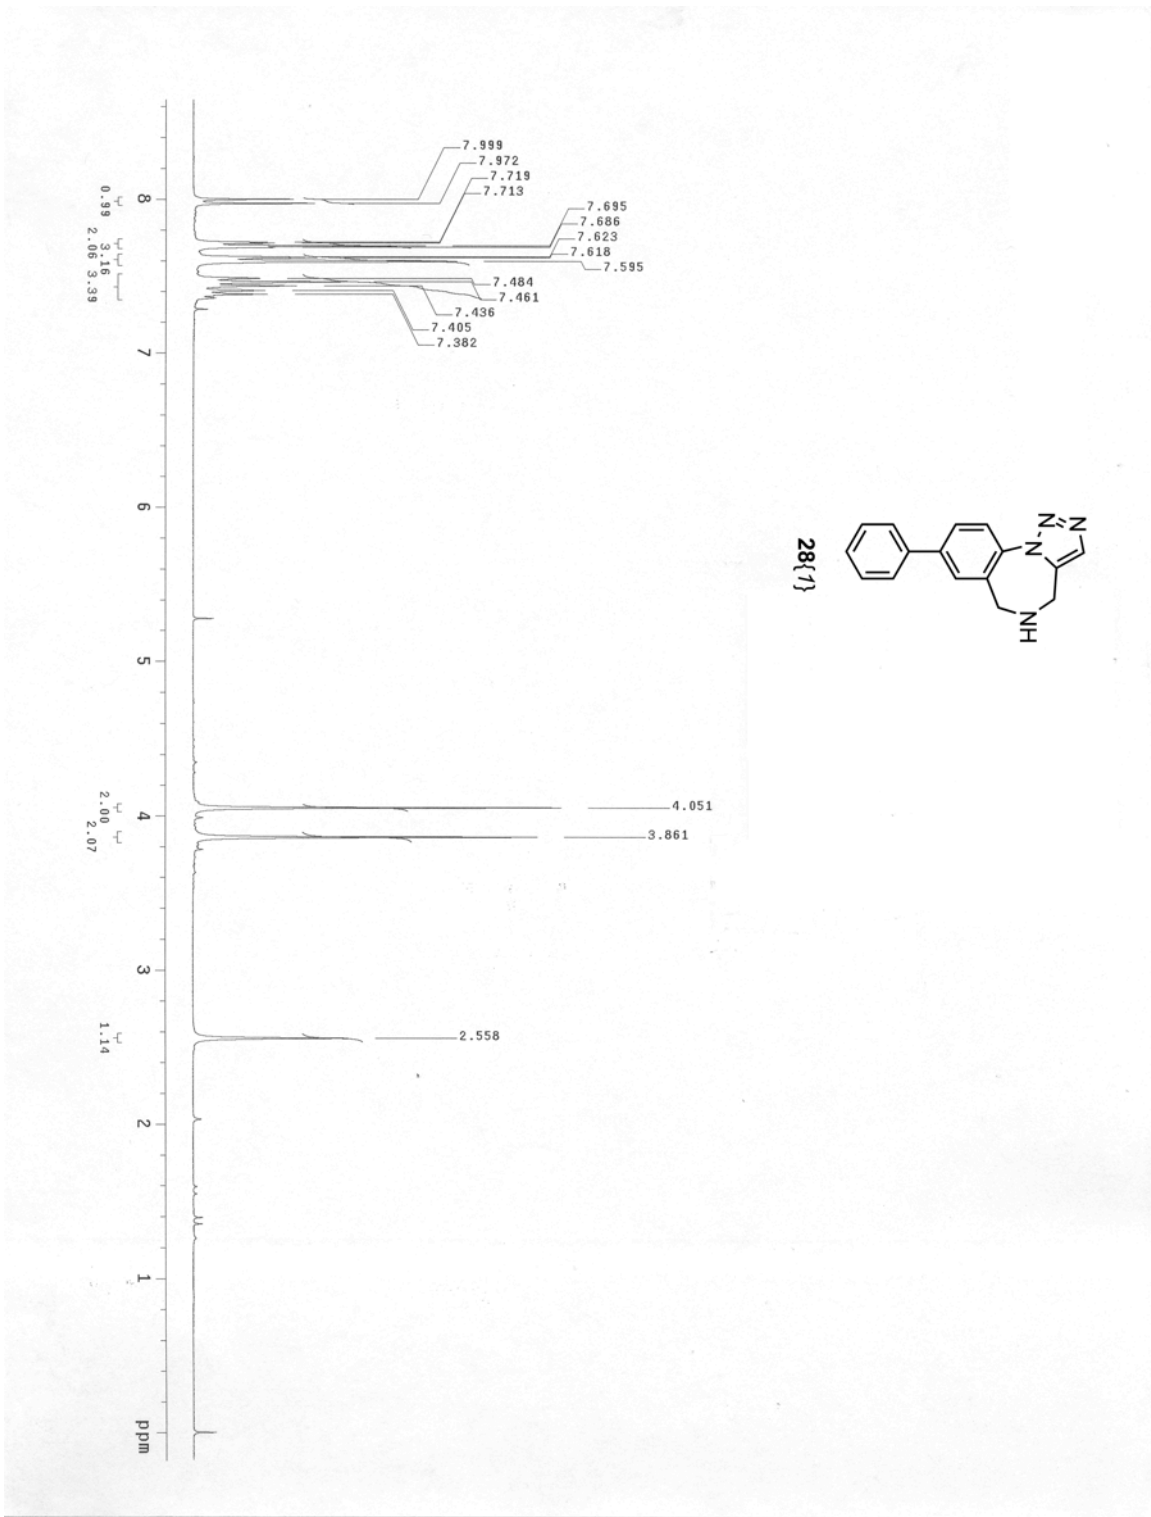



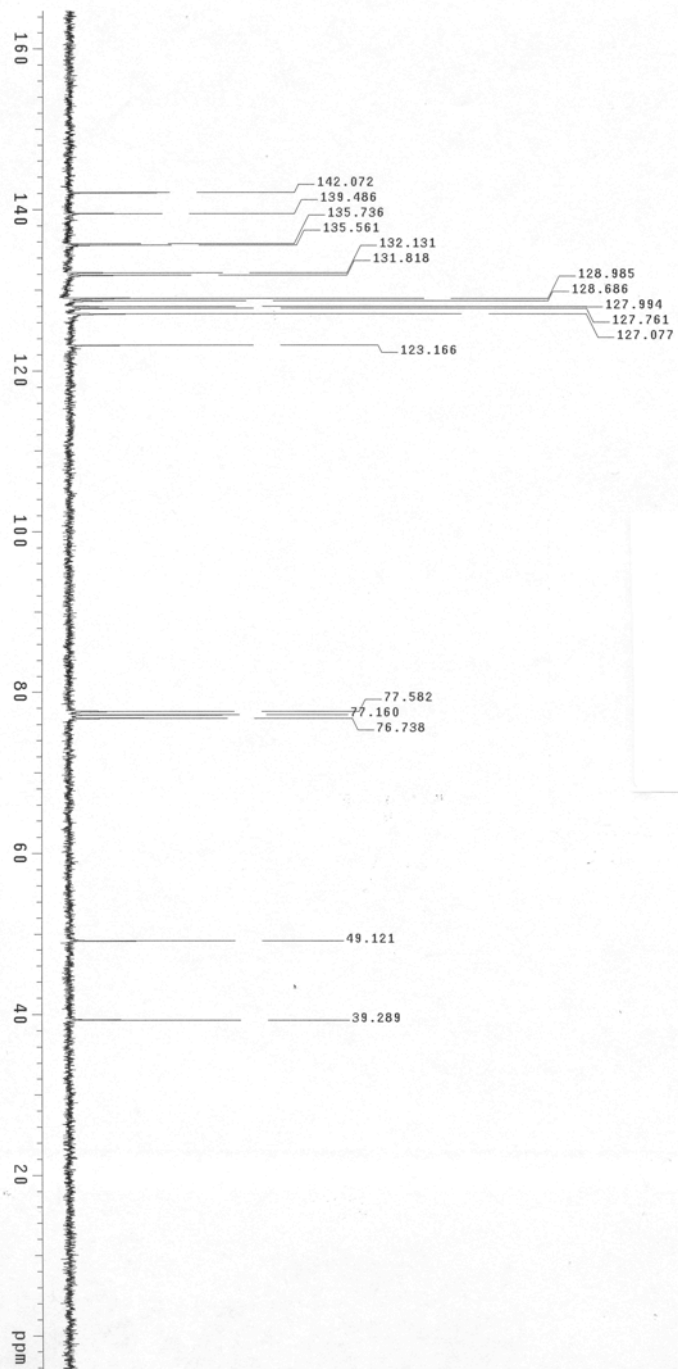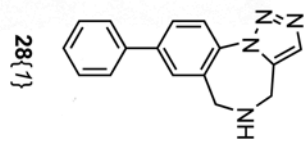

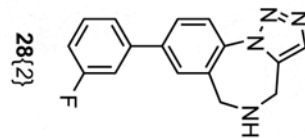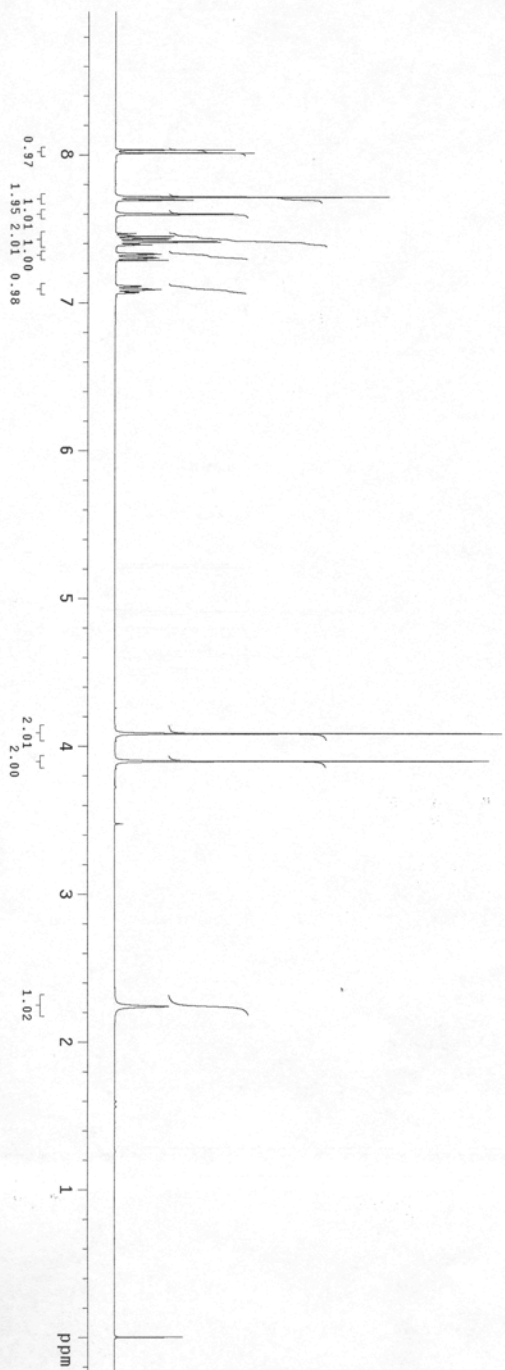

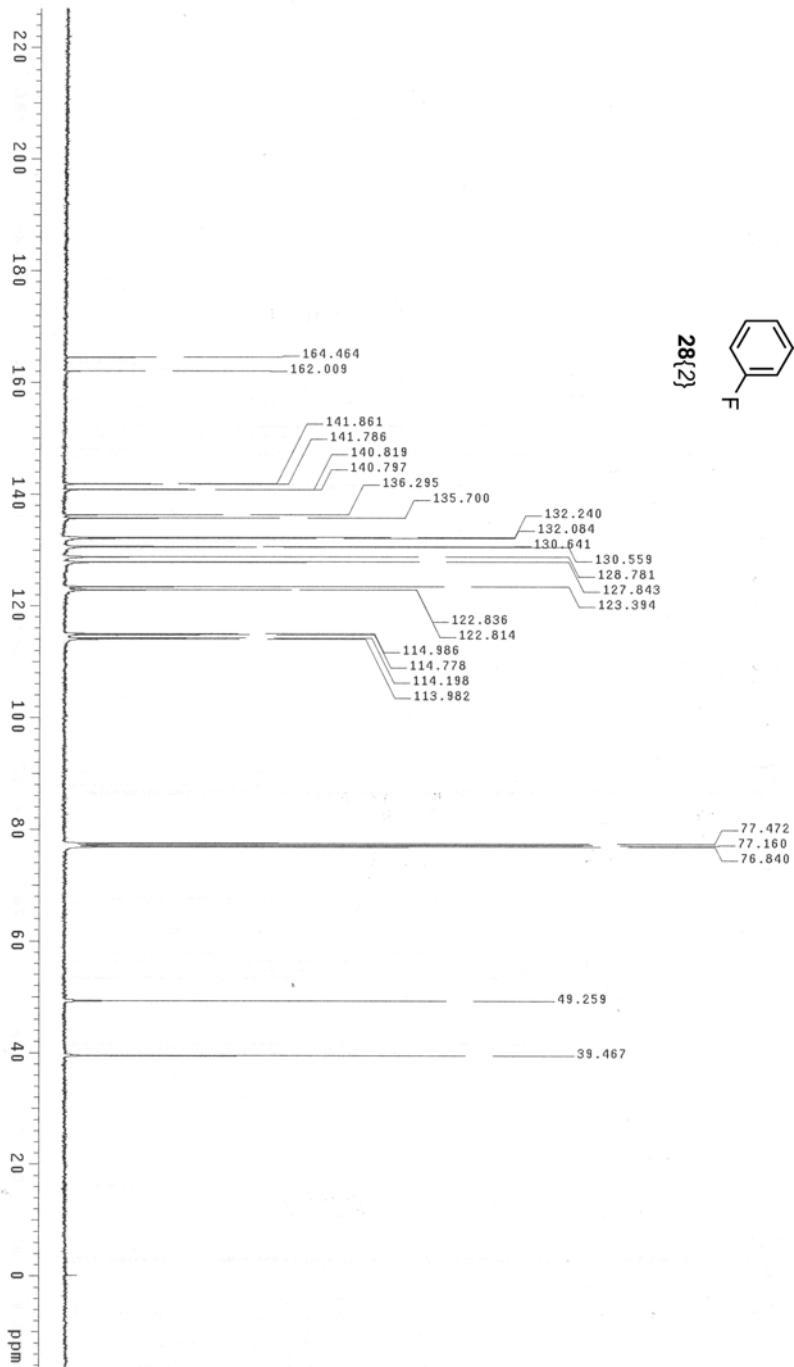

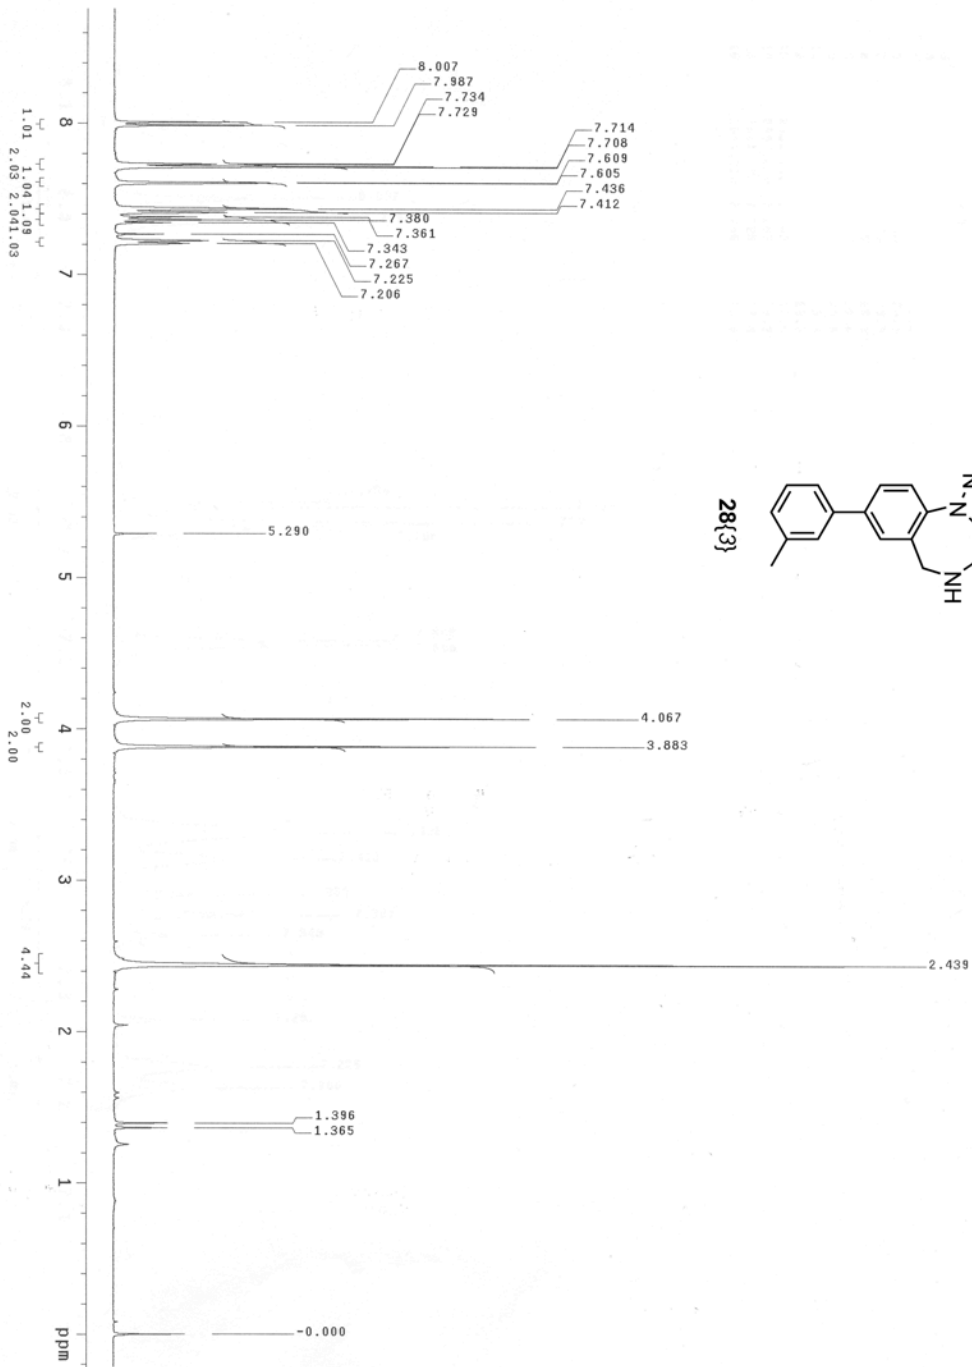

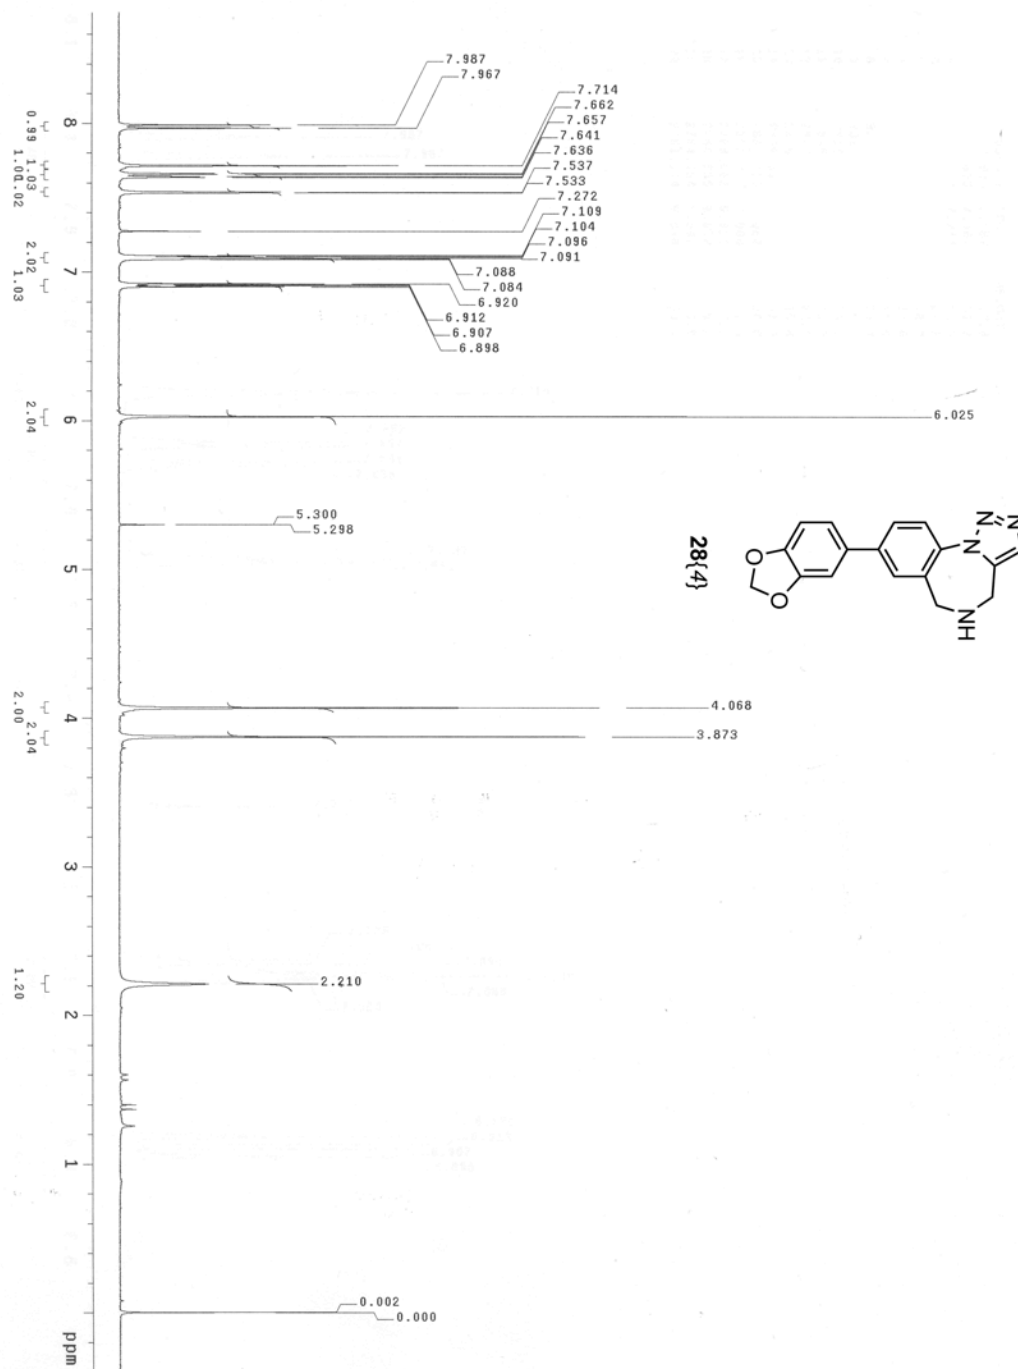

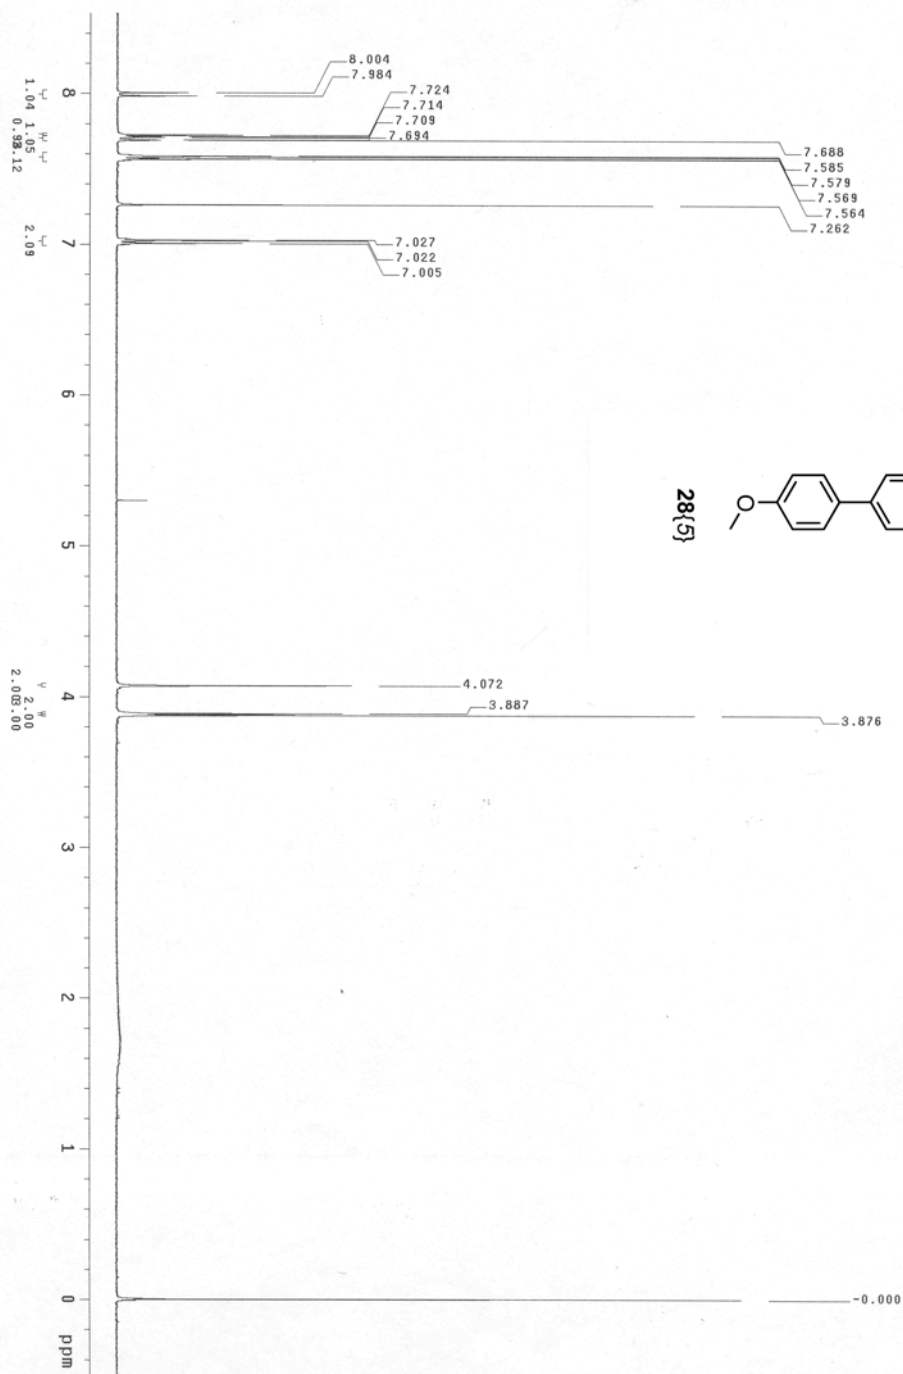

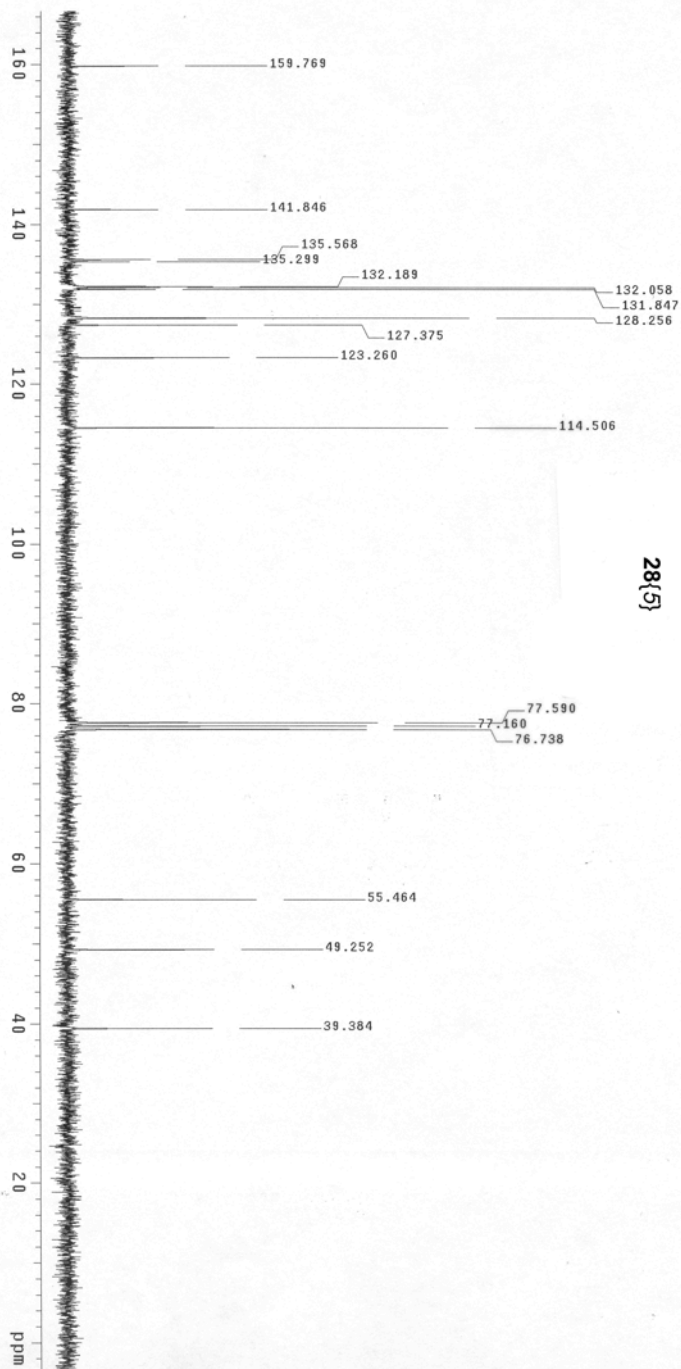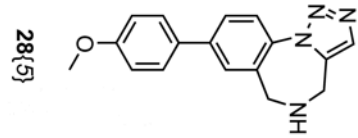

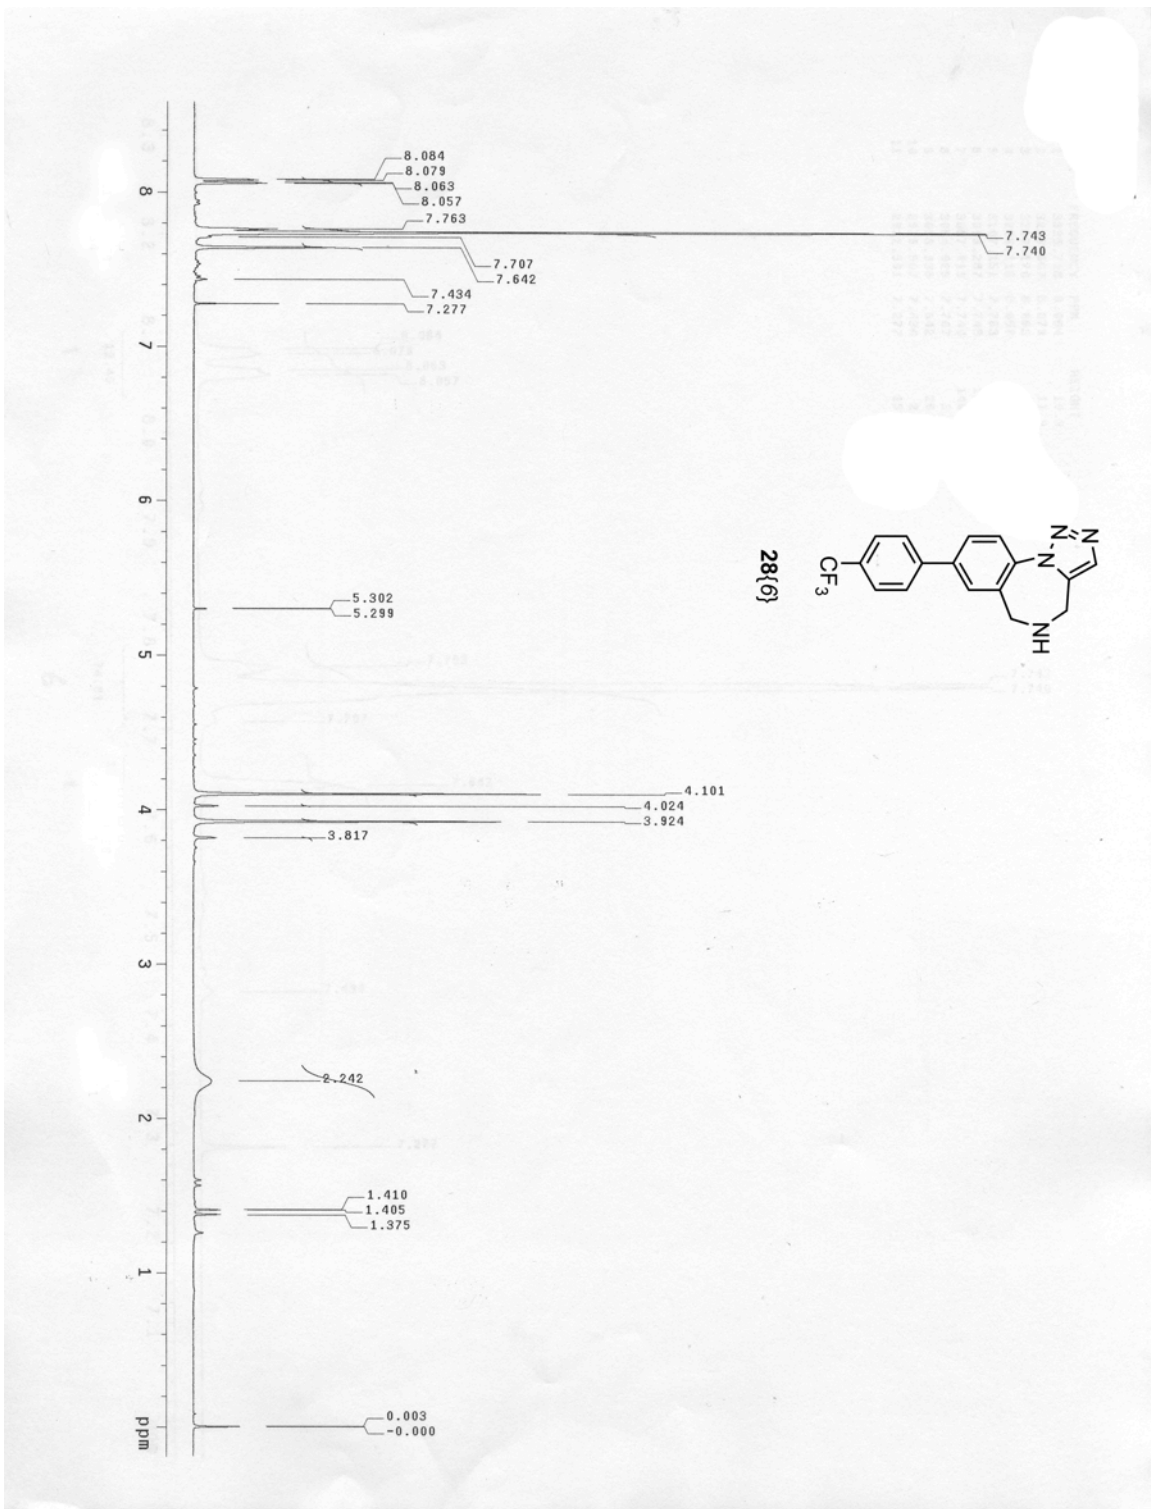



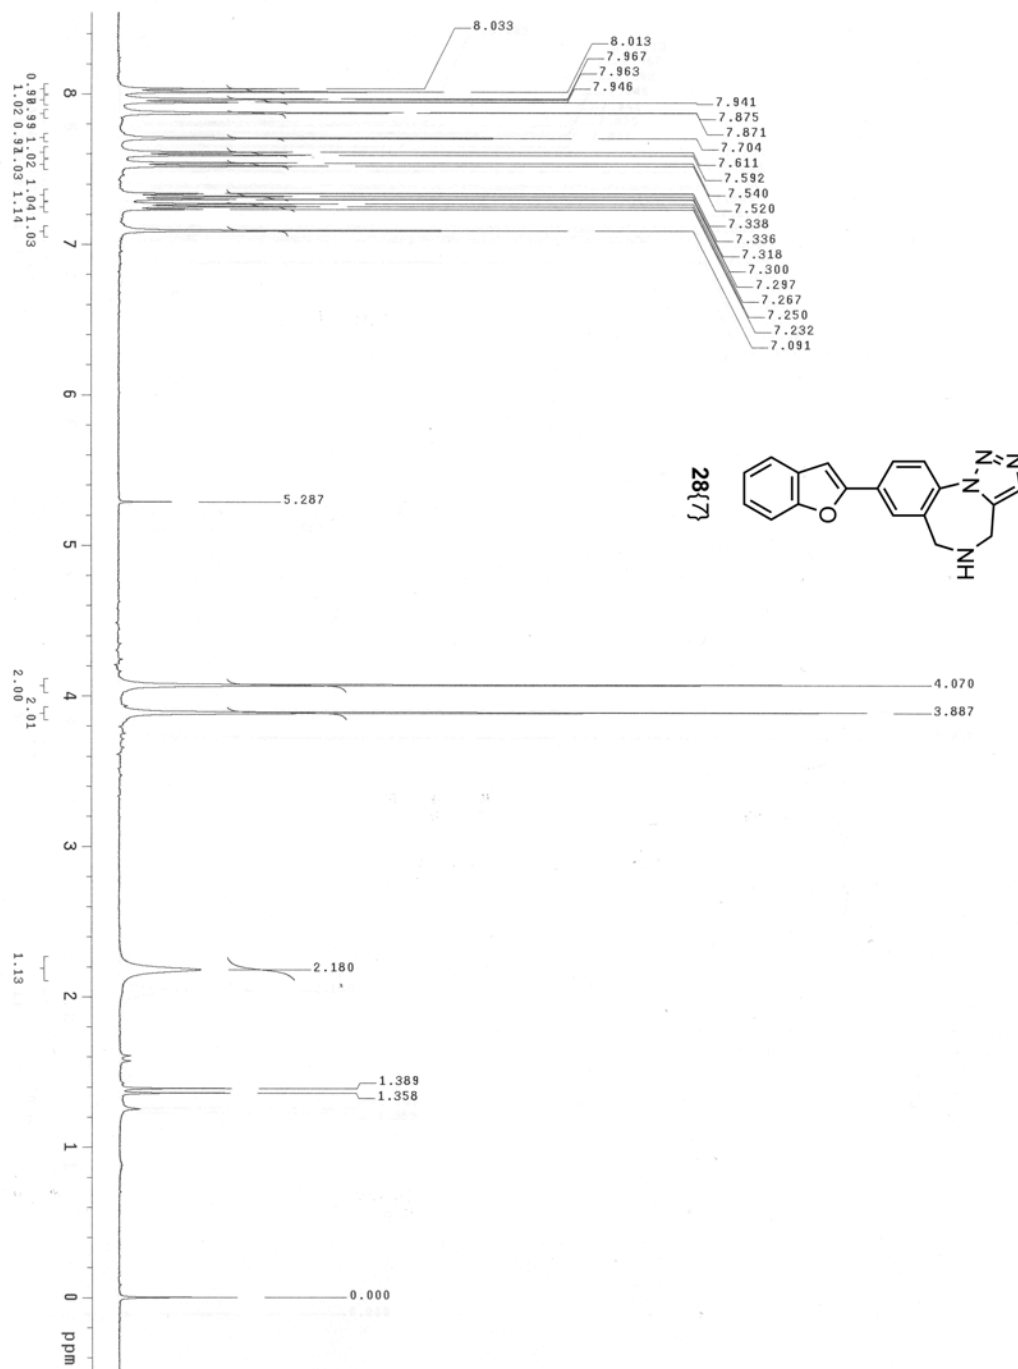

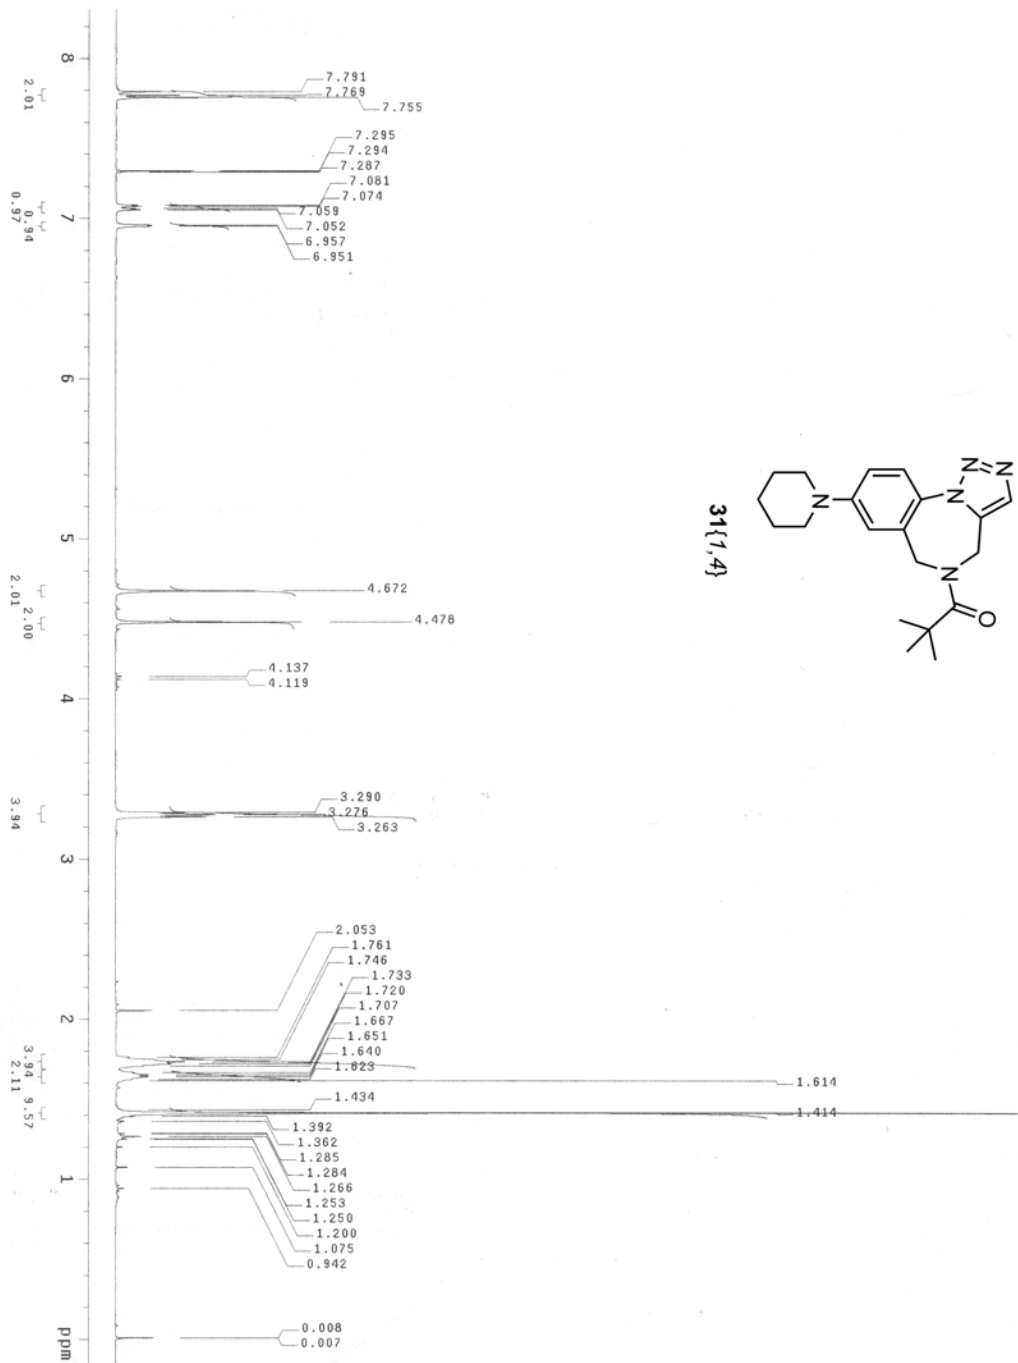

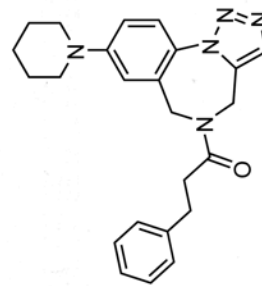

31{1,13}

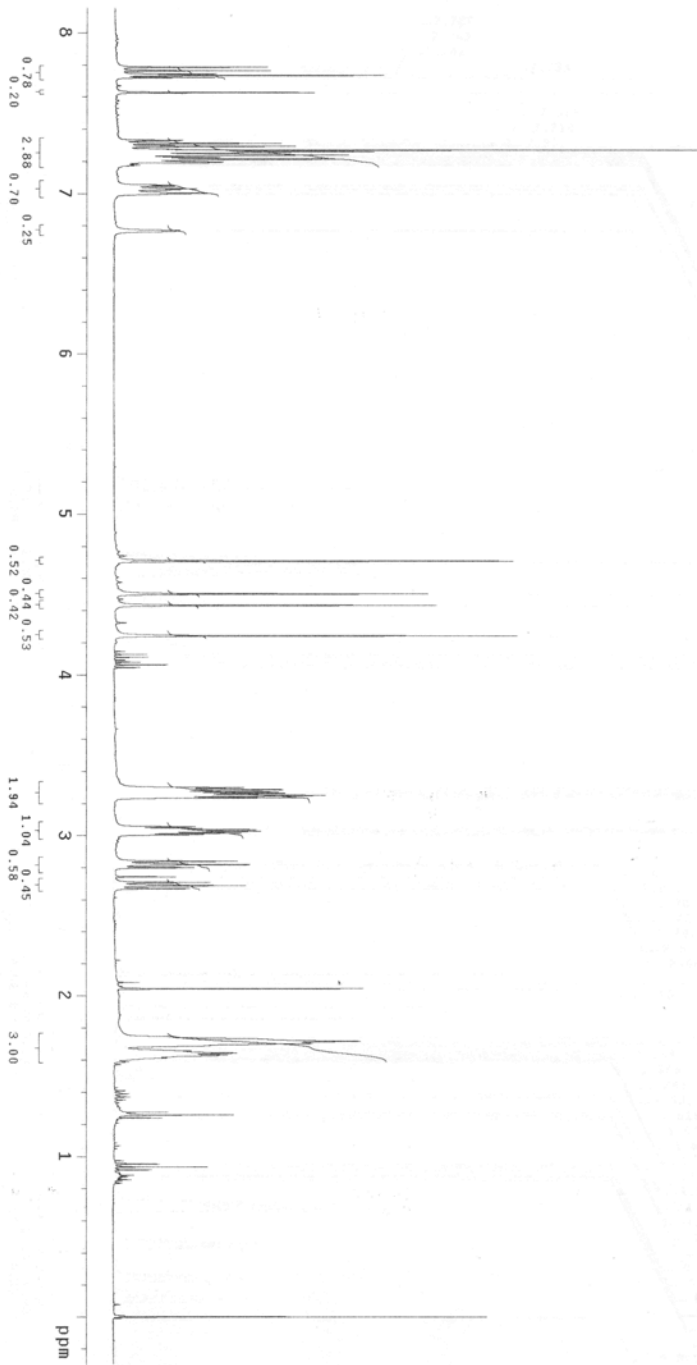

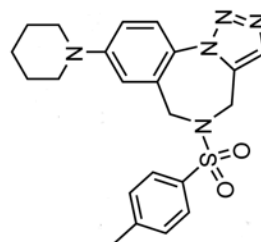

33{1,5}

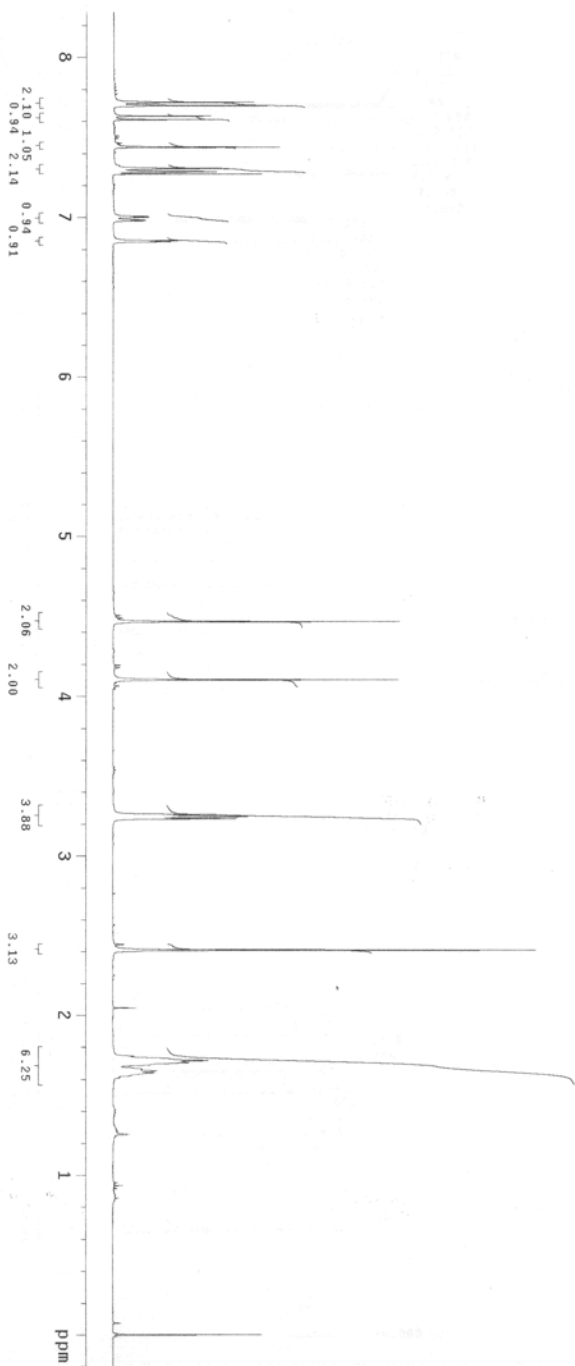

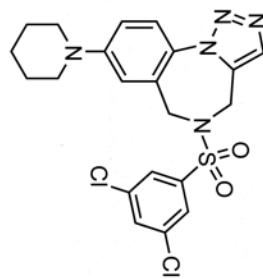

33{1,11}

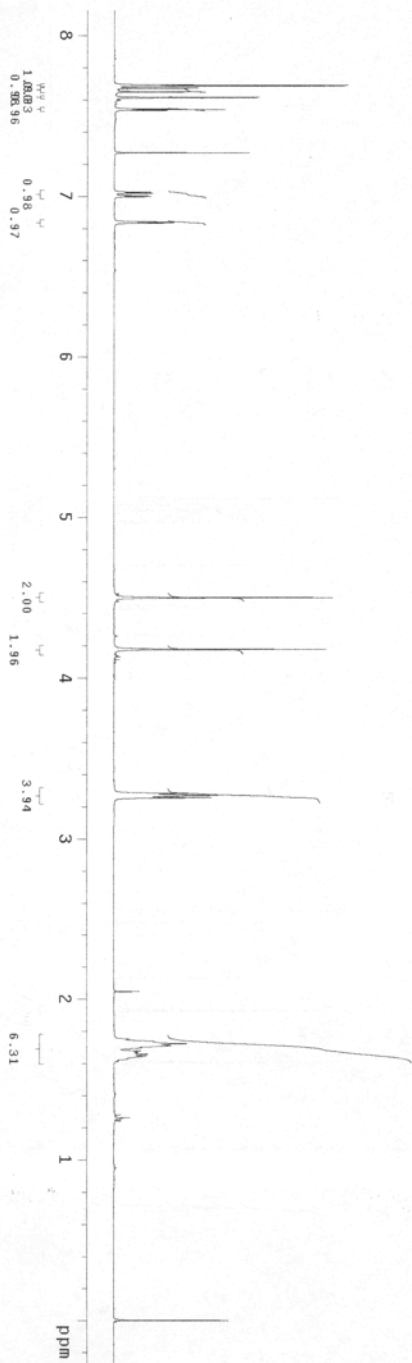

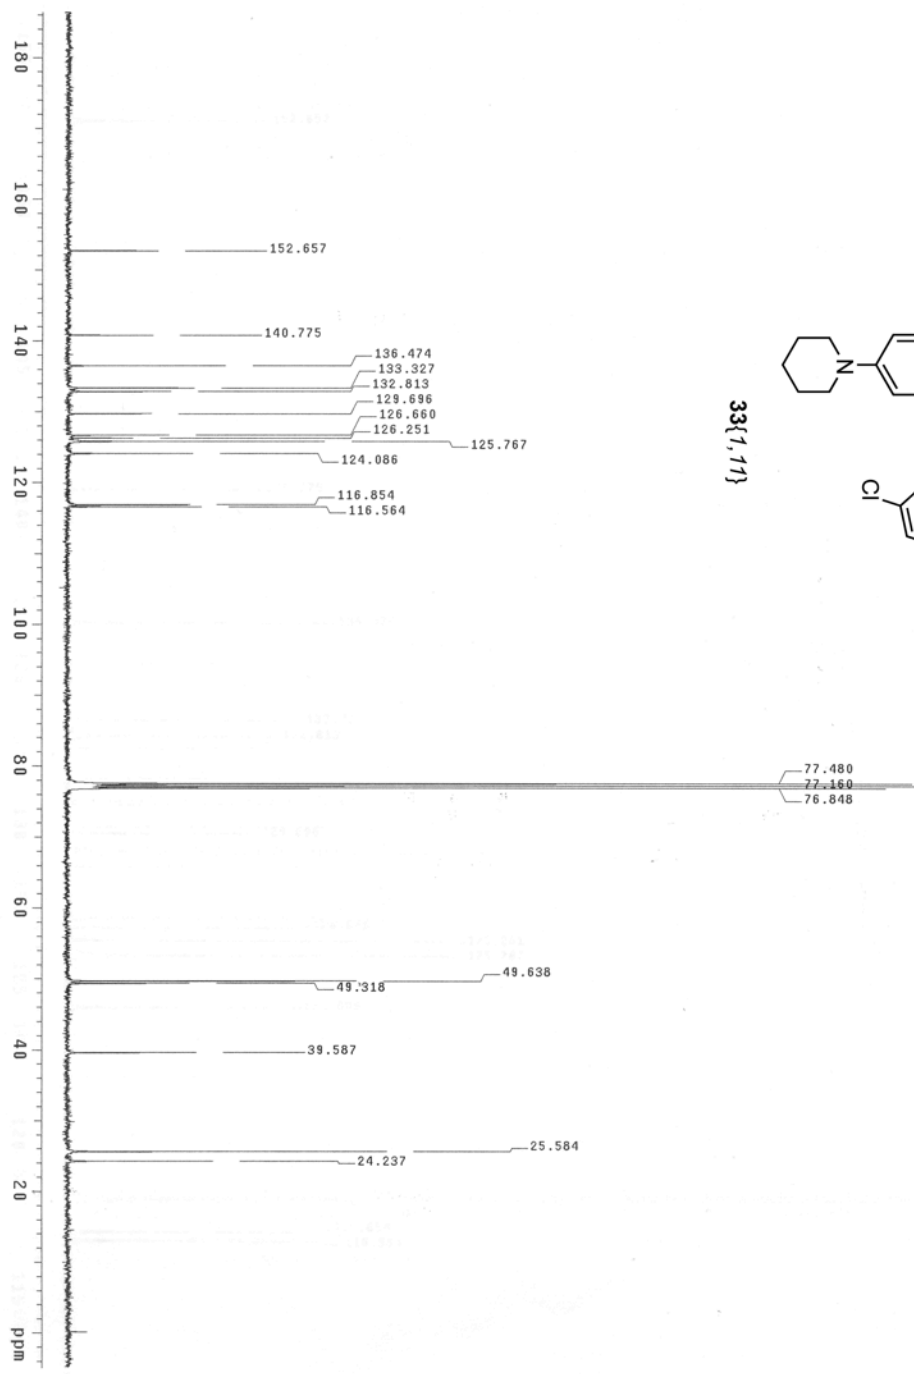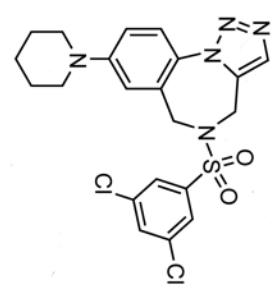

33(1,11)

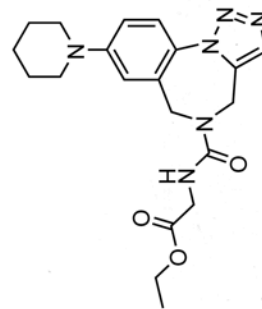

35{1,2}

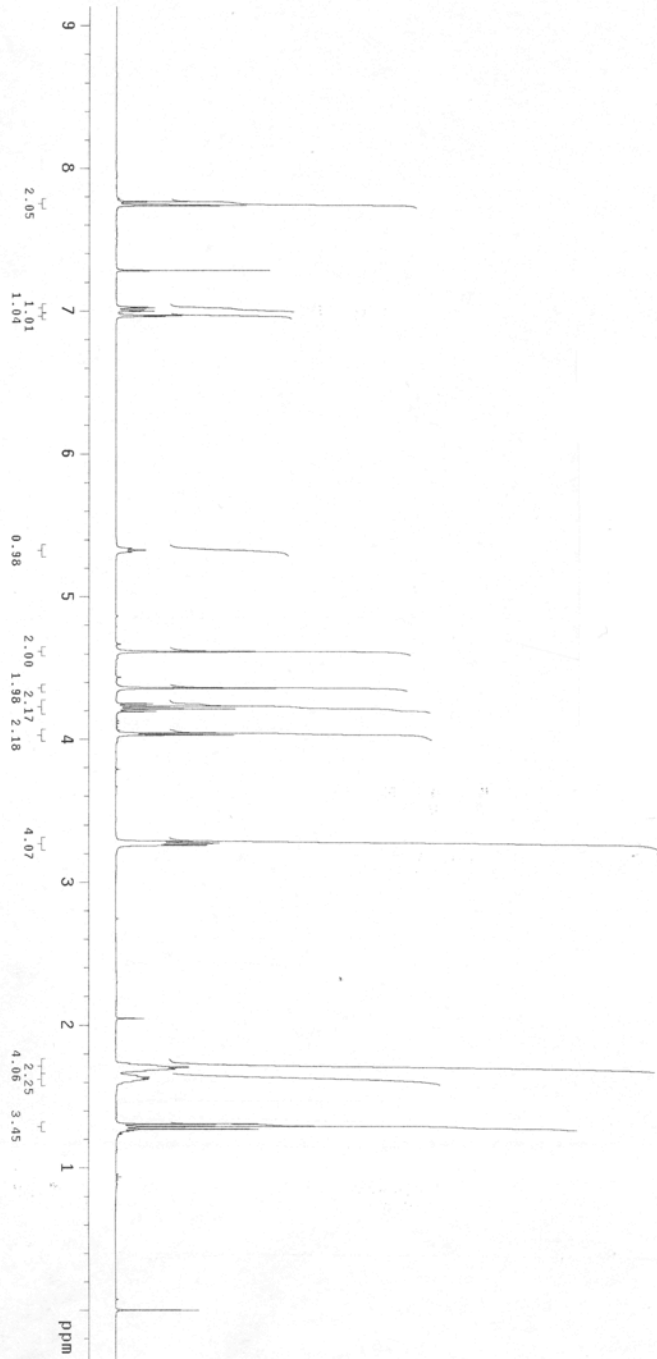

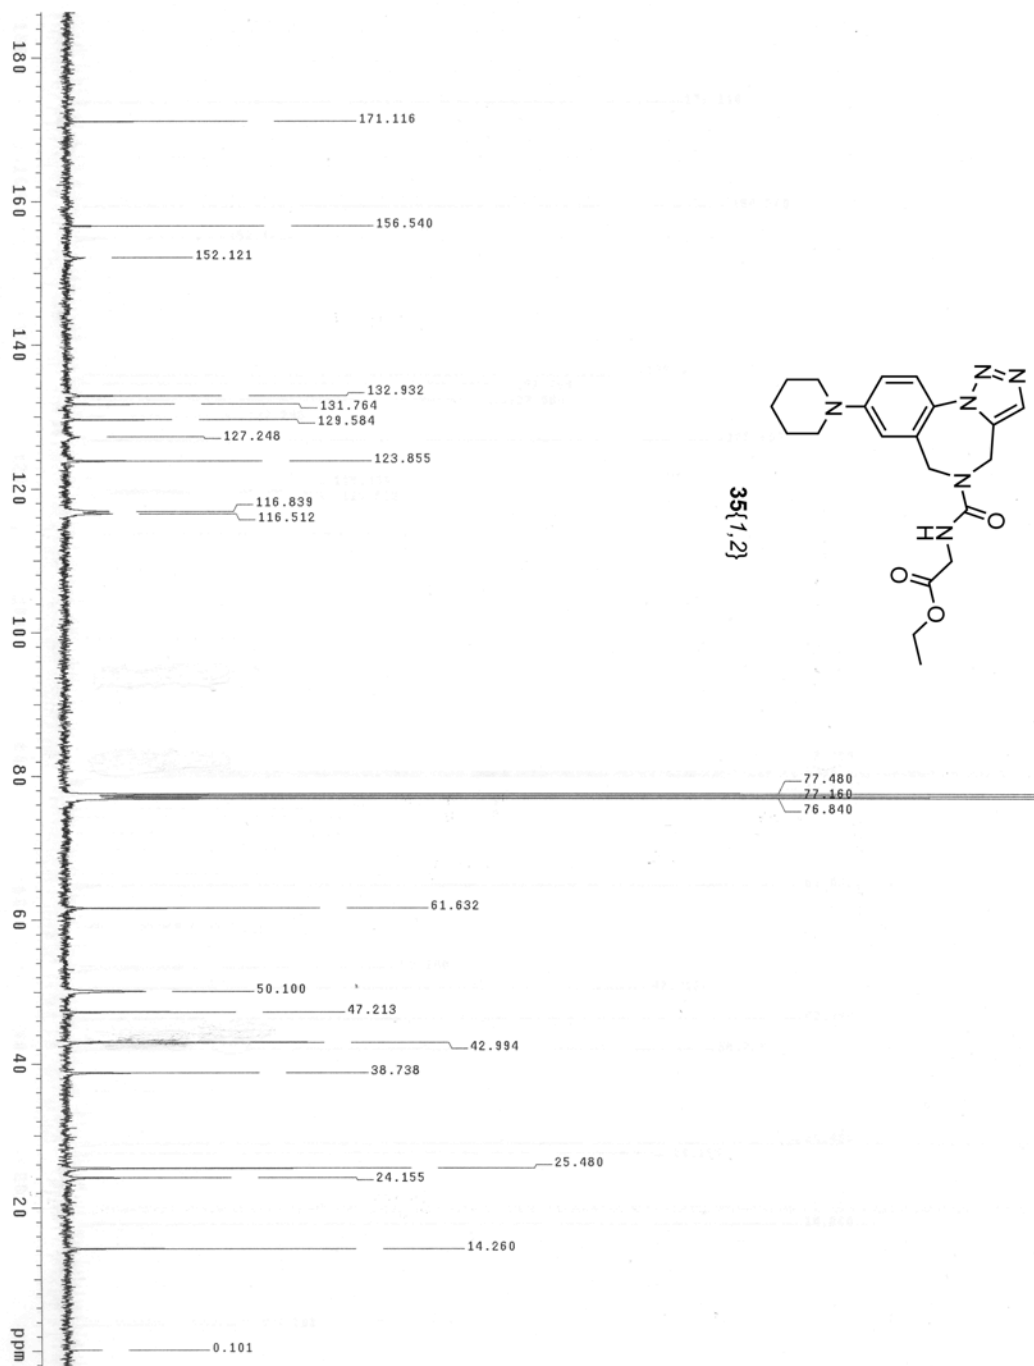



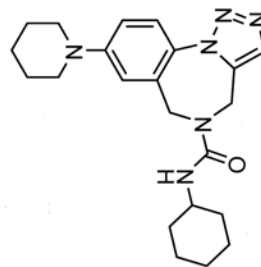

35(1,3)

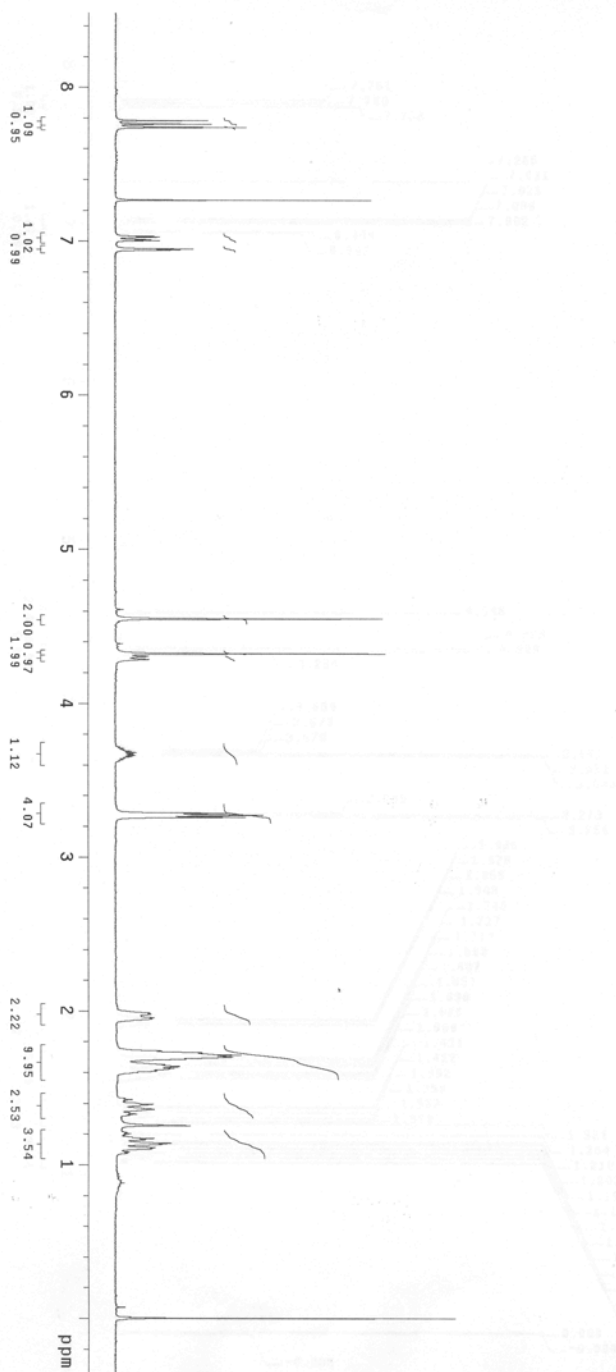

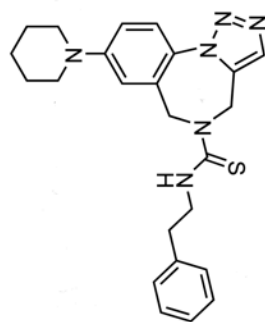

37{1,3}

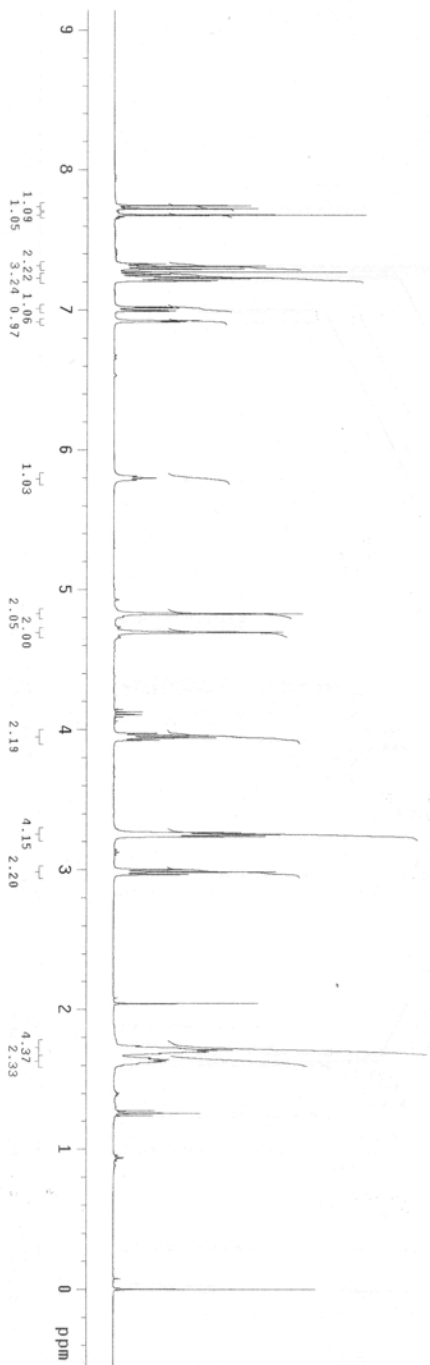

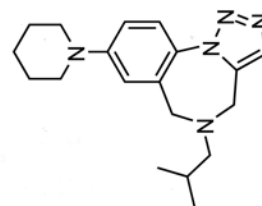

39 {1, 2}

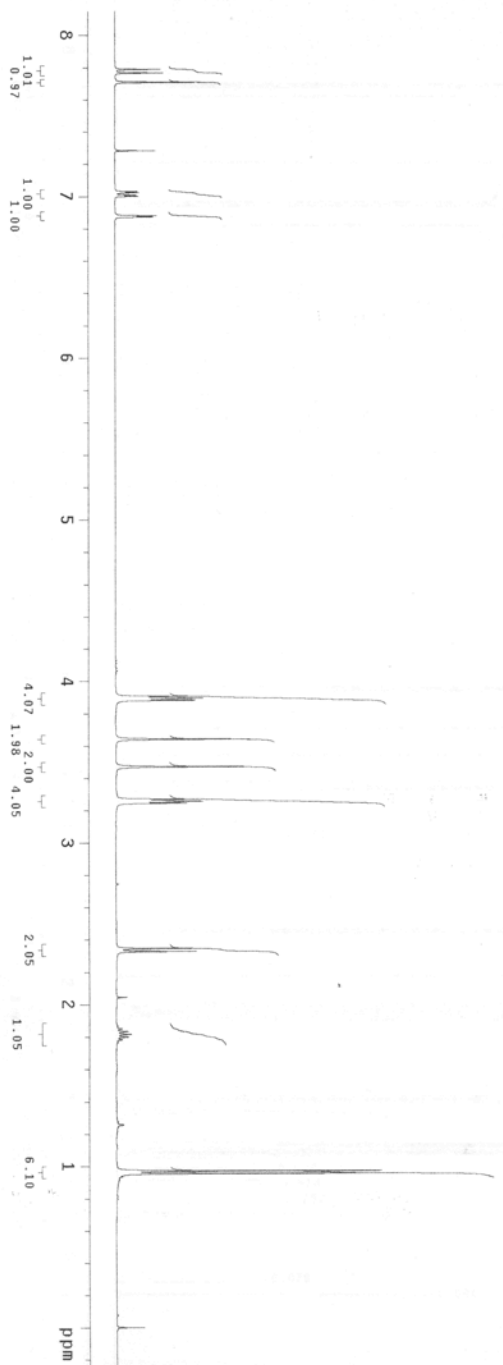

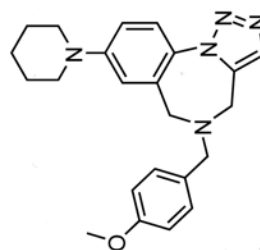

39{1,14}

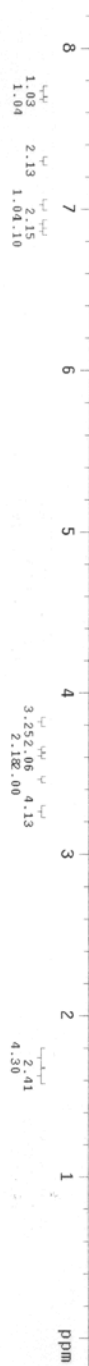

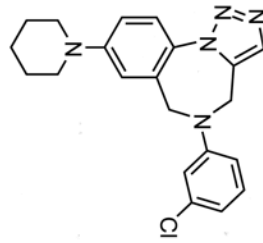

44{1,1}

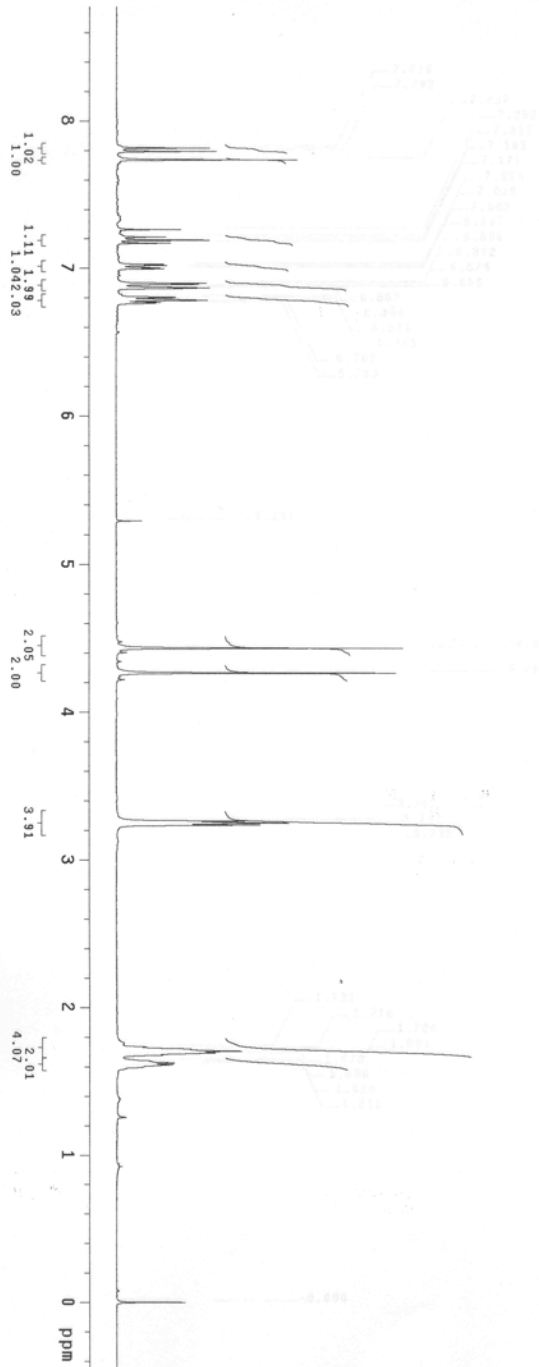

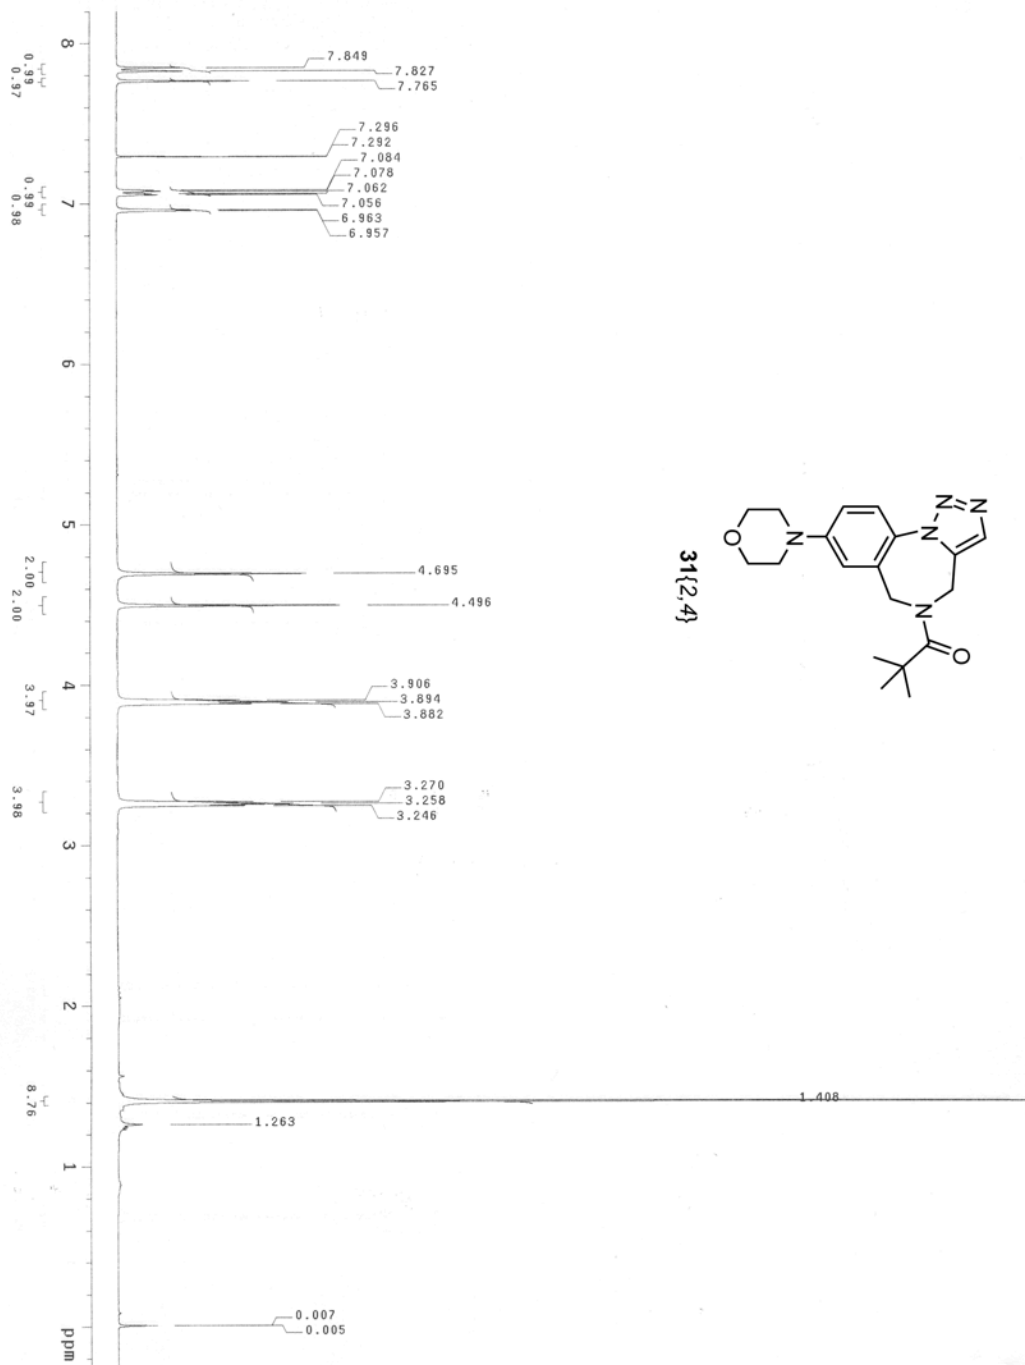

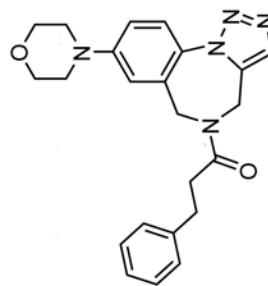

31{2,13}

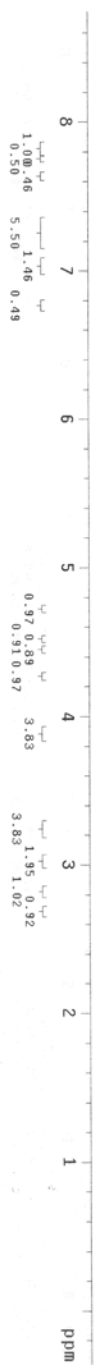

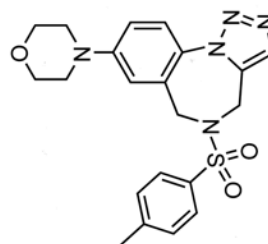

33(2,5)

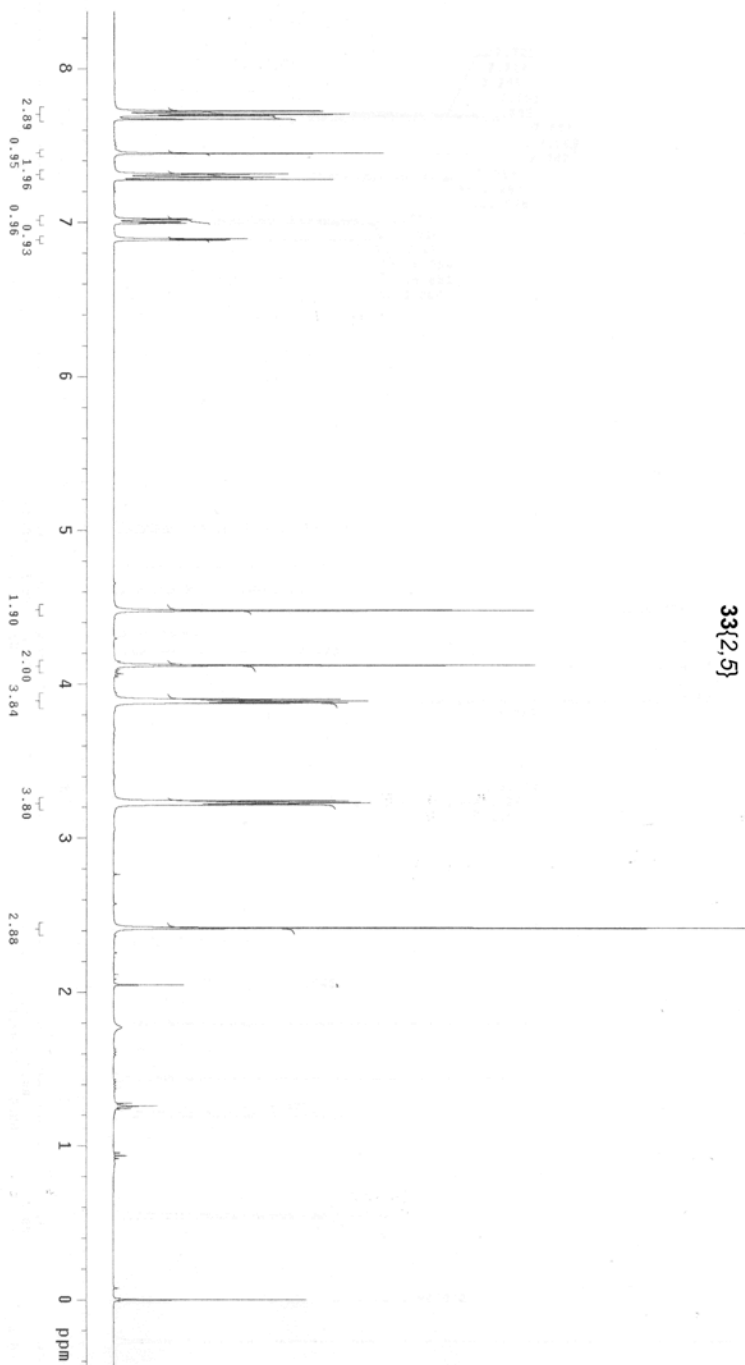



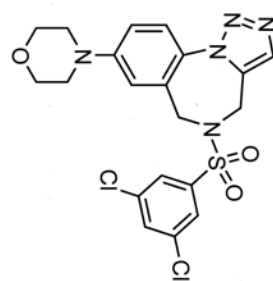

33{2,11}

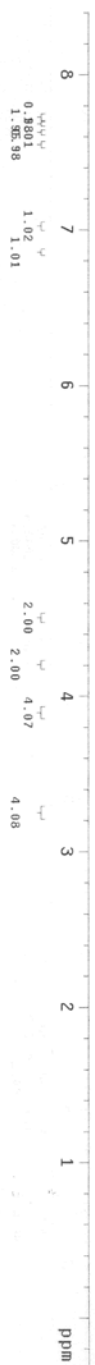

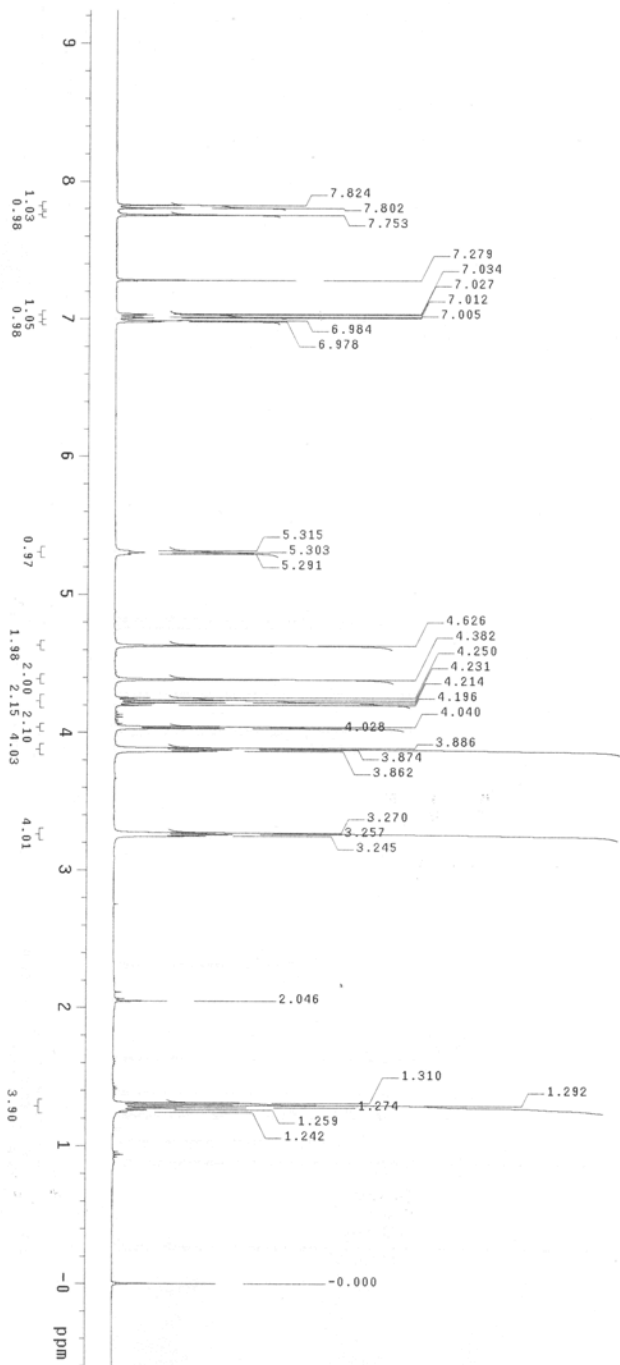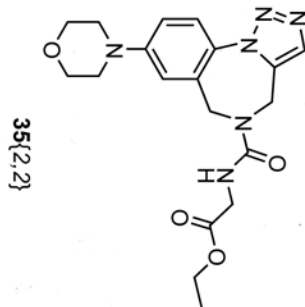

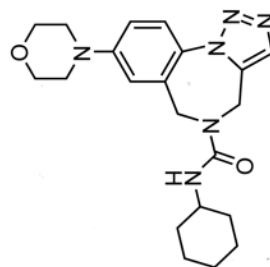

35{2,3}

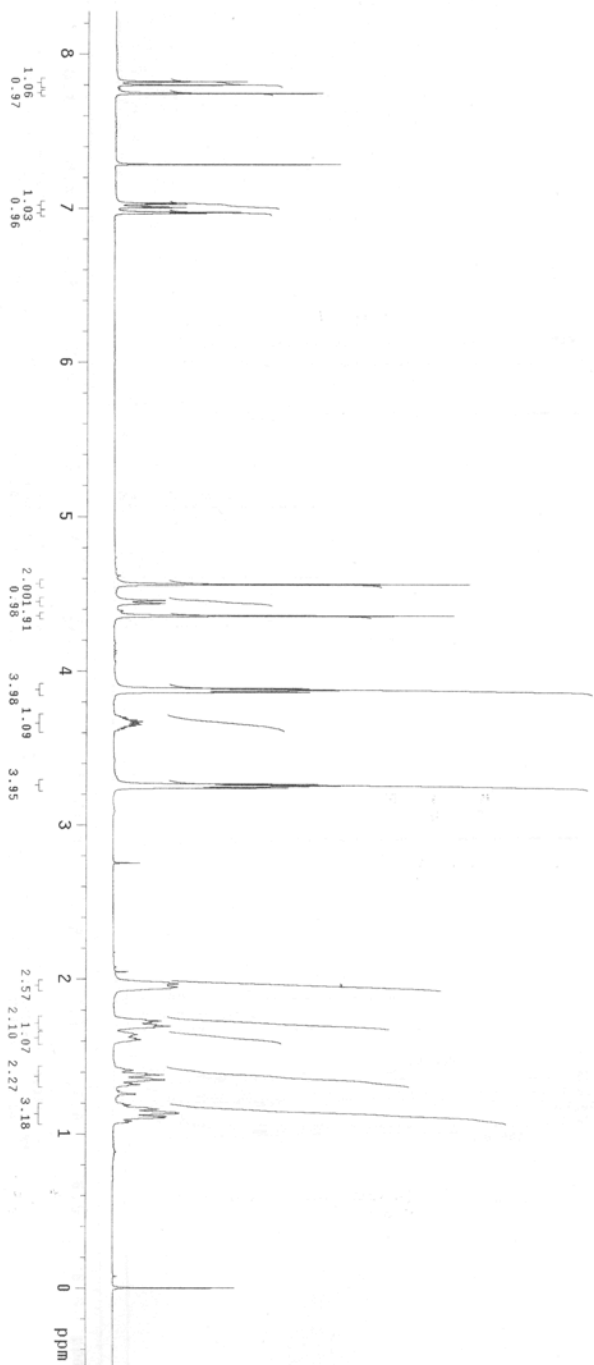

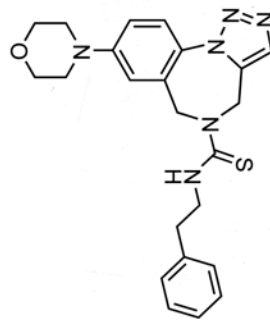

37{2,3}

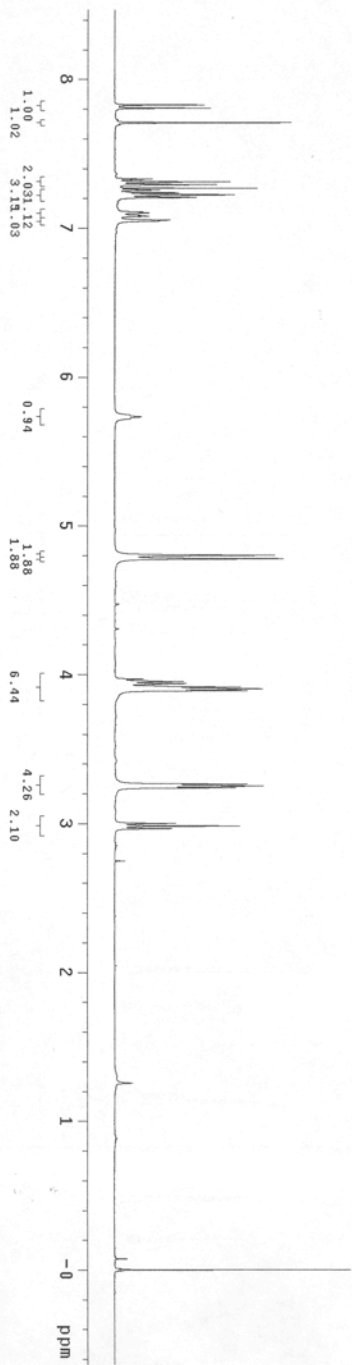

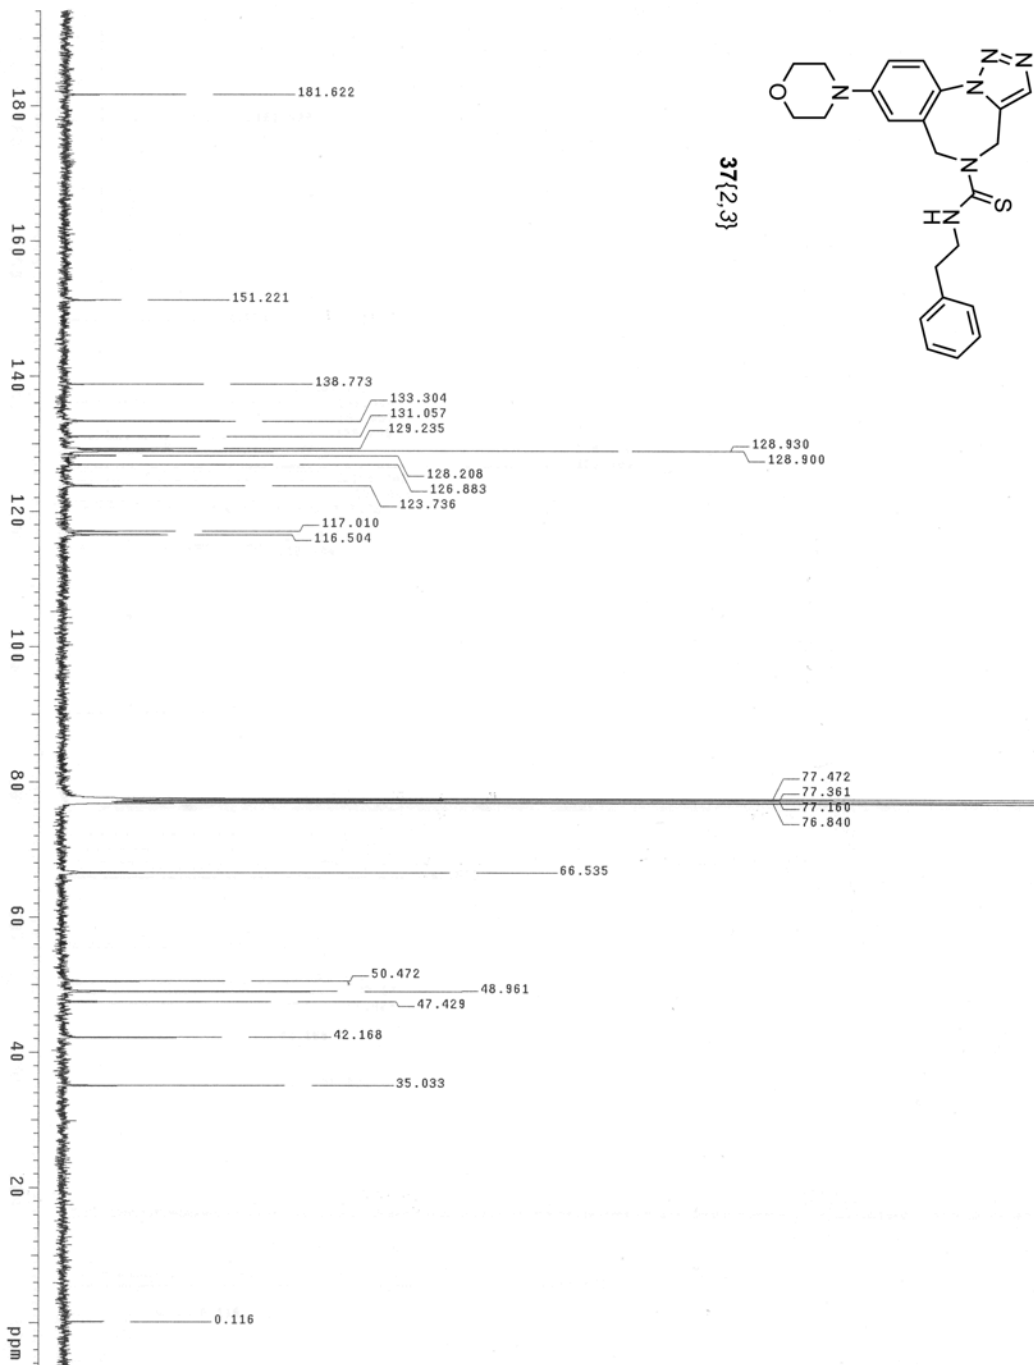

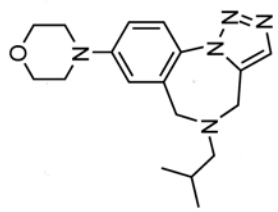

39(2,2)

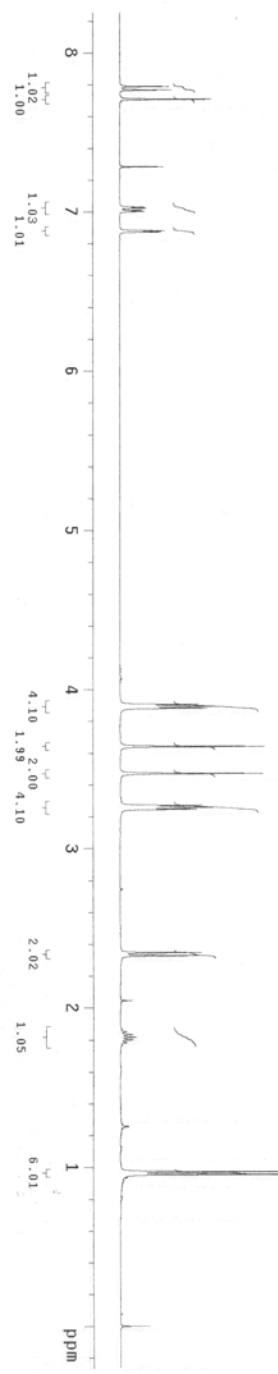

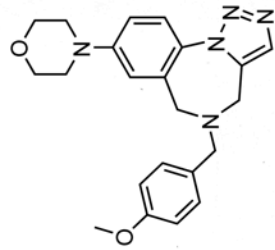

39(2,14)

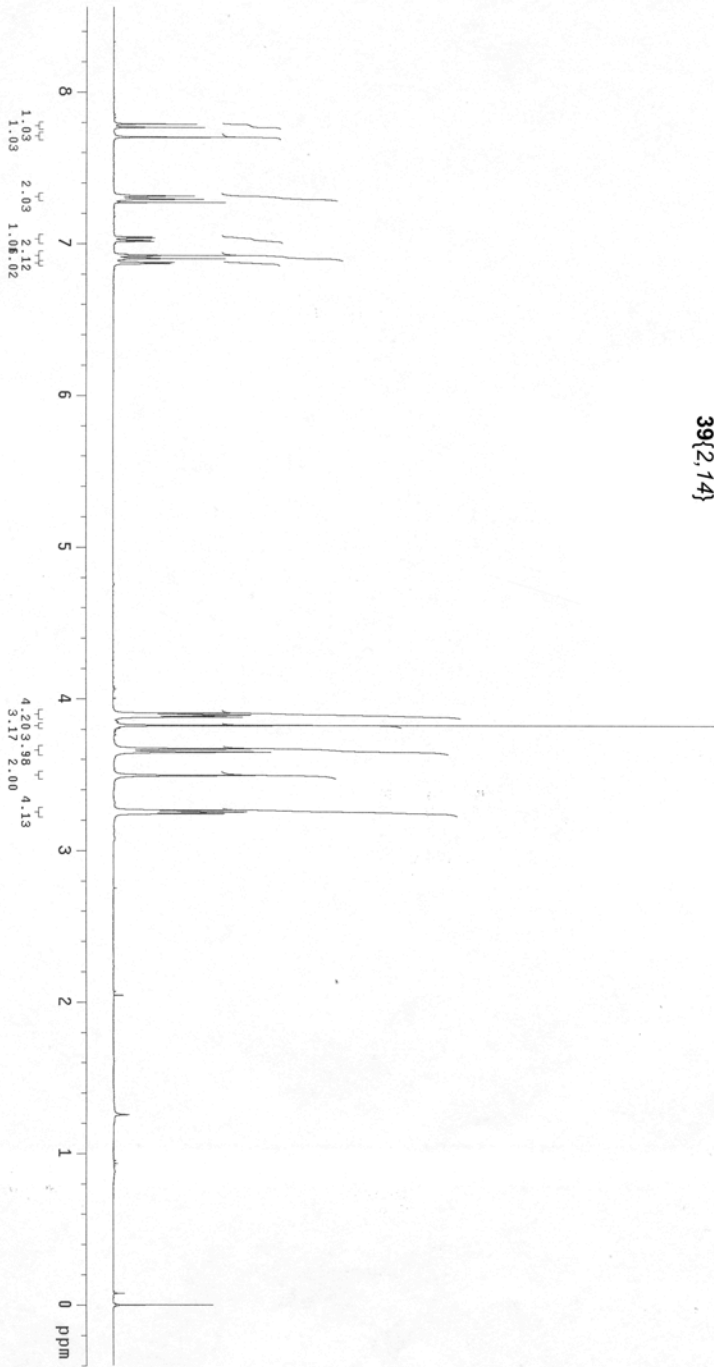

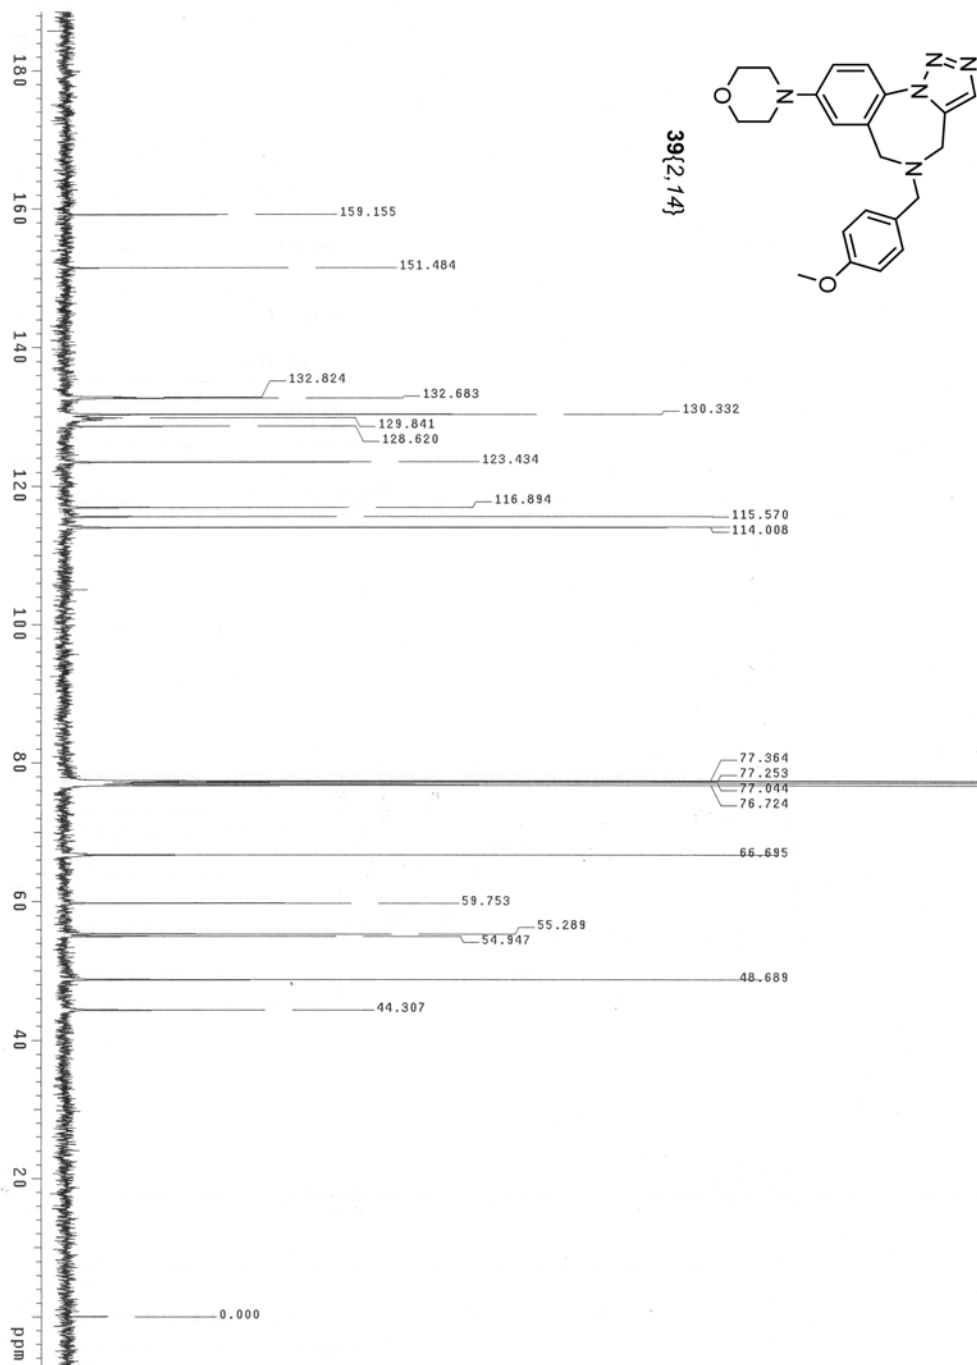



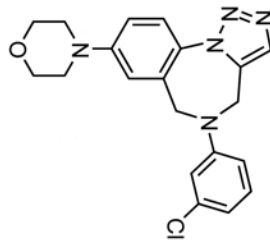

41{2,1}

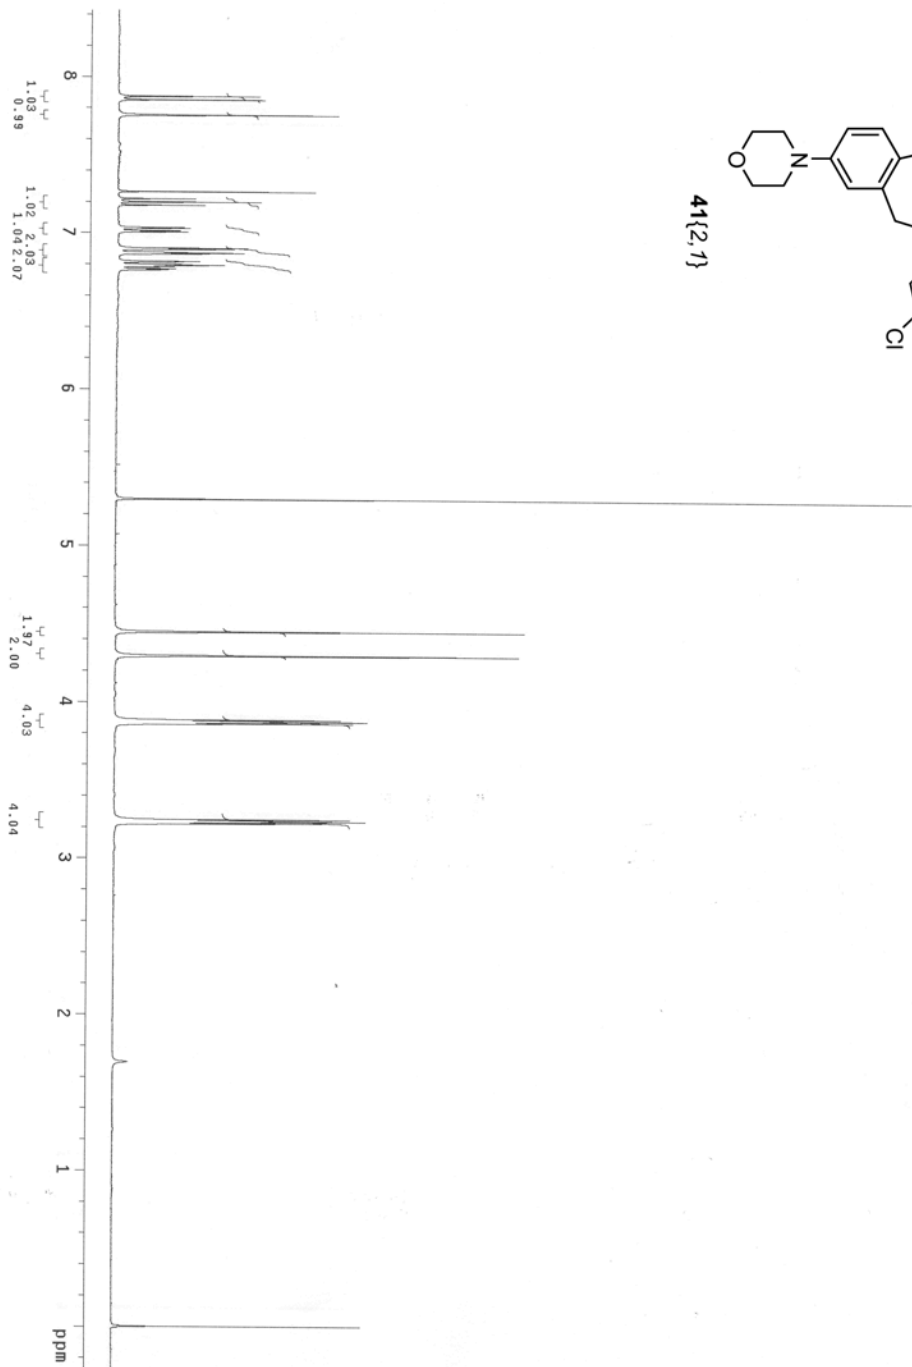

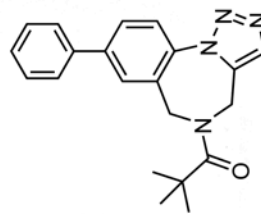

32(1.4)

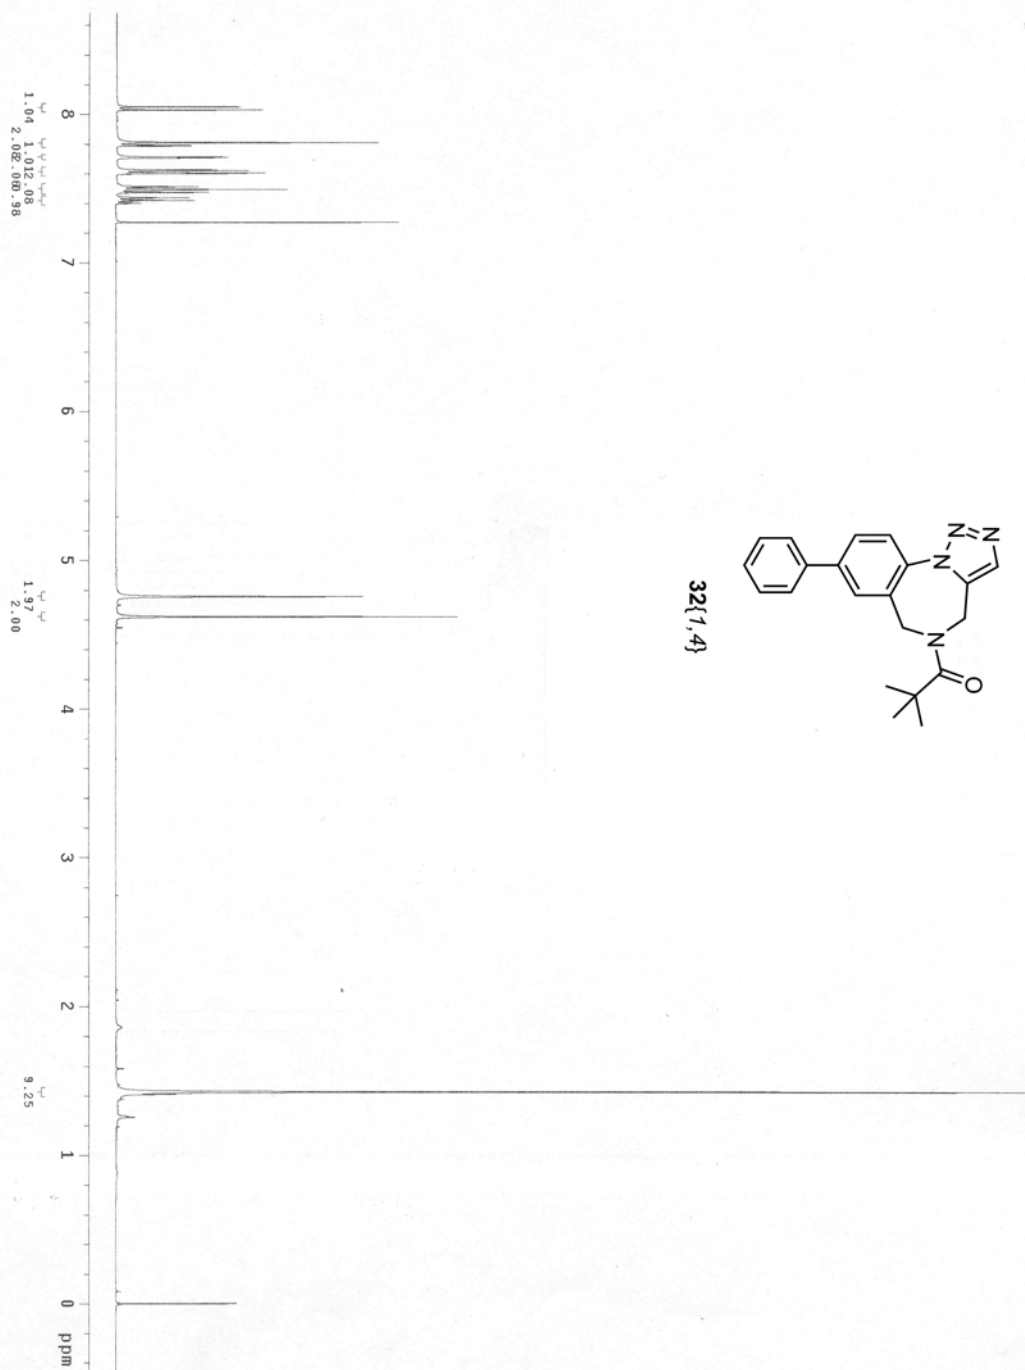

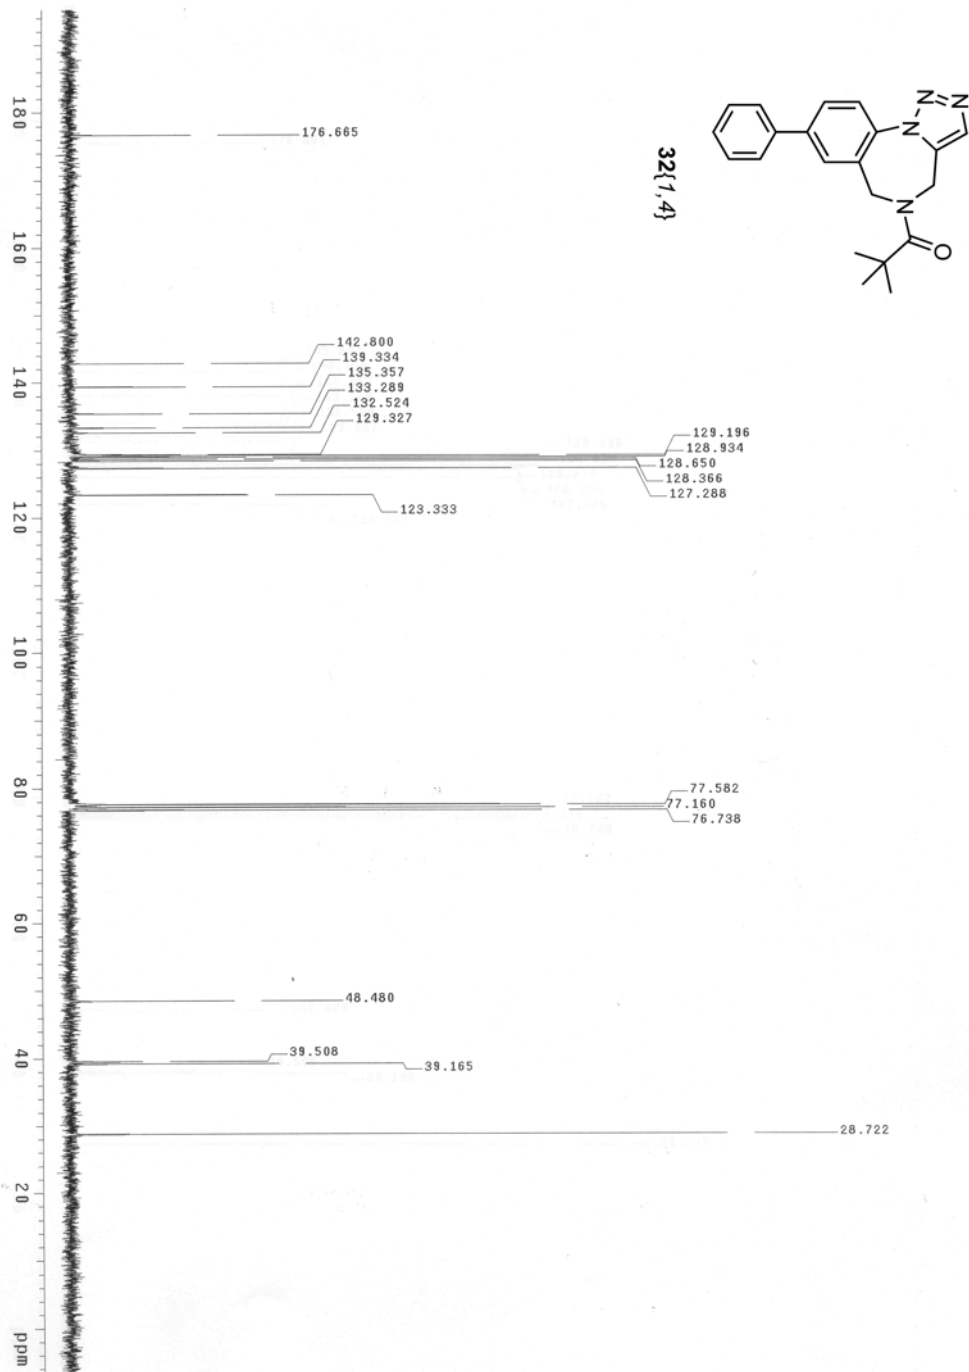

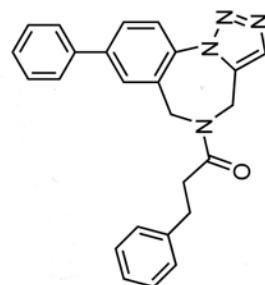

32{1,13}

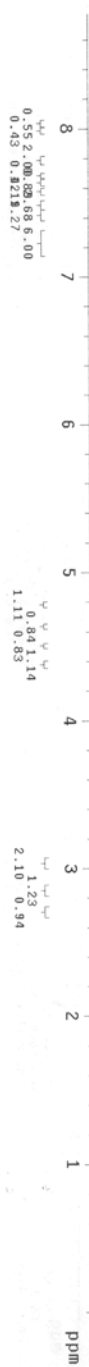

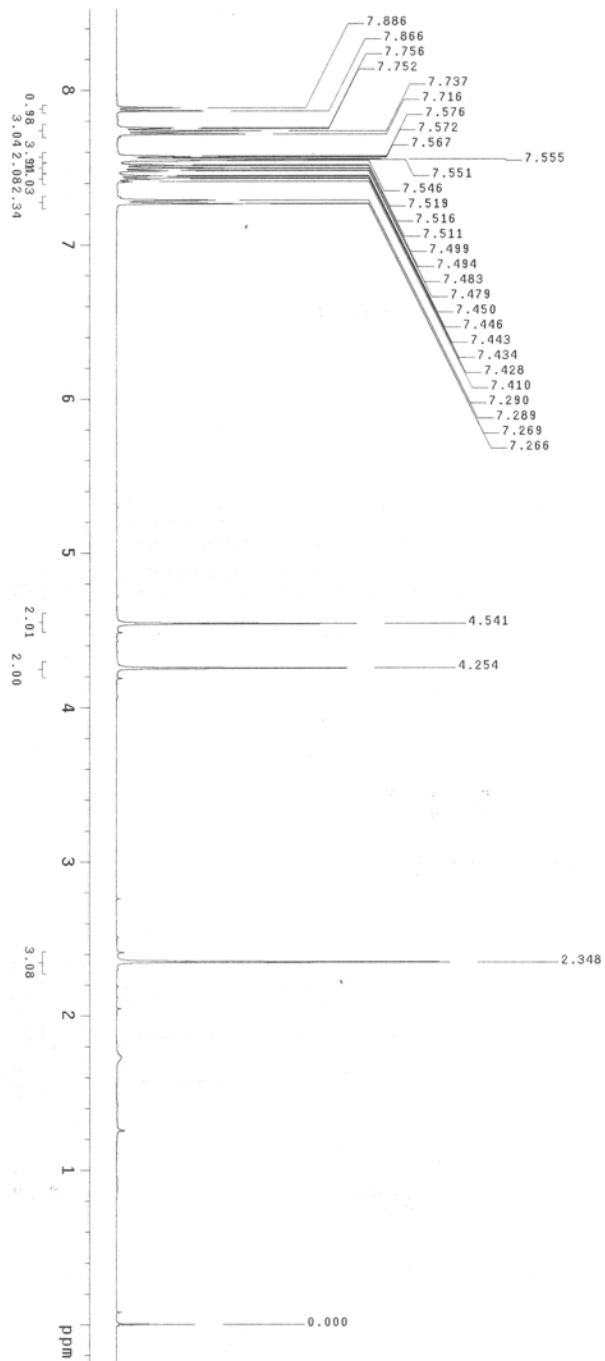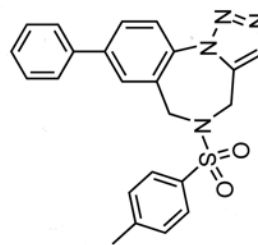

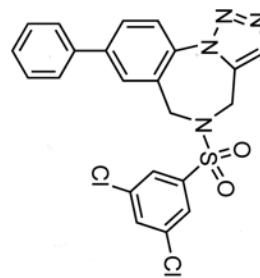

34(1,11)

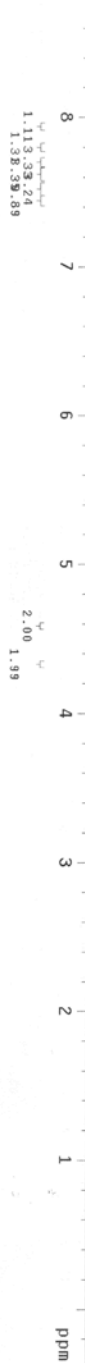

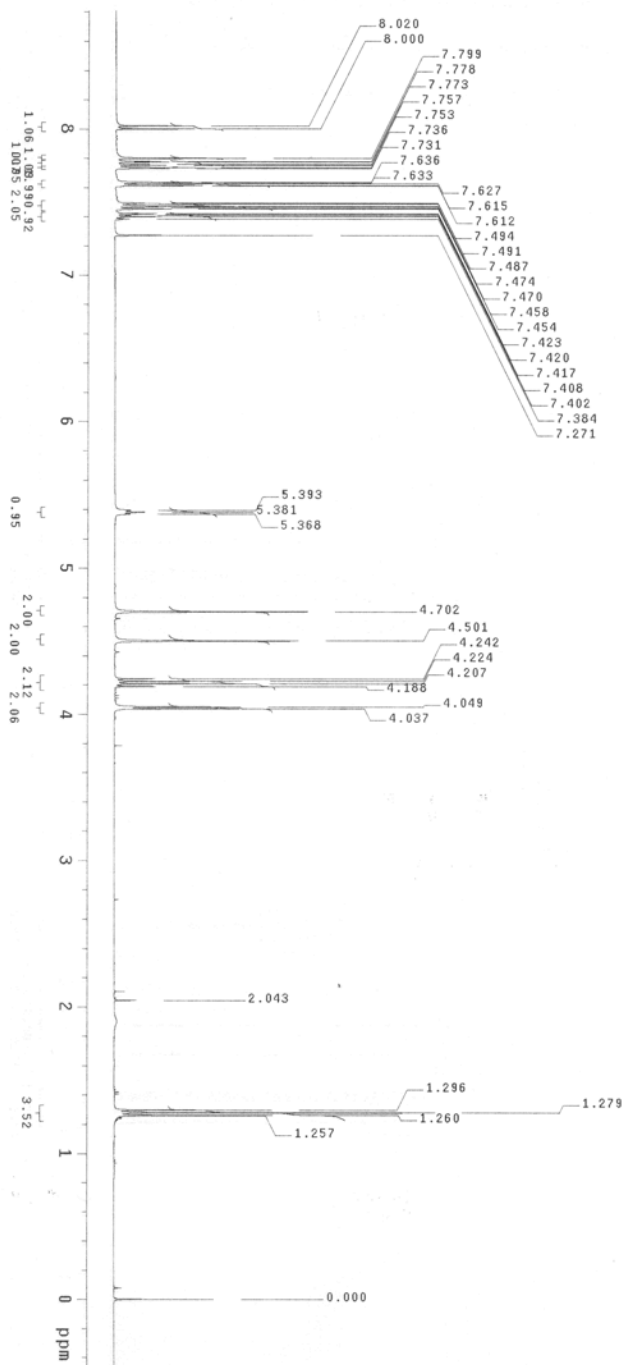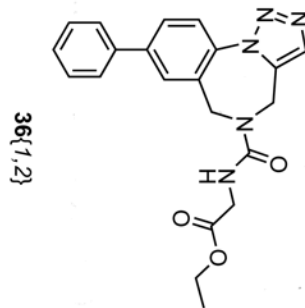

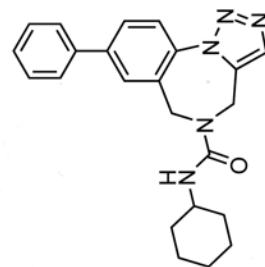

36 (1,3)

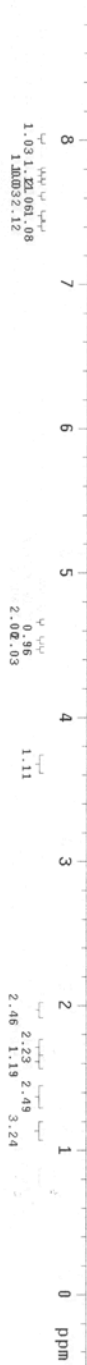



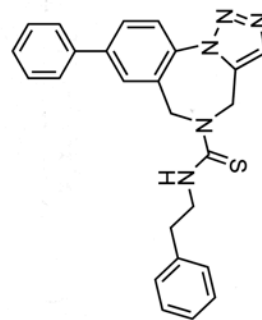

38{1,3}

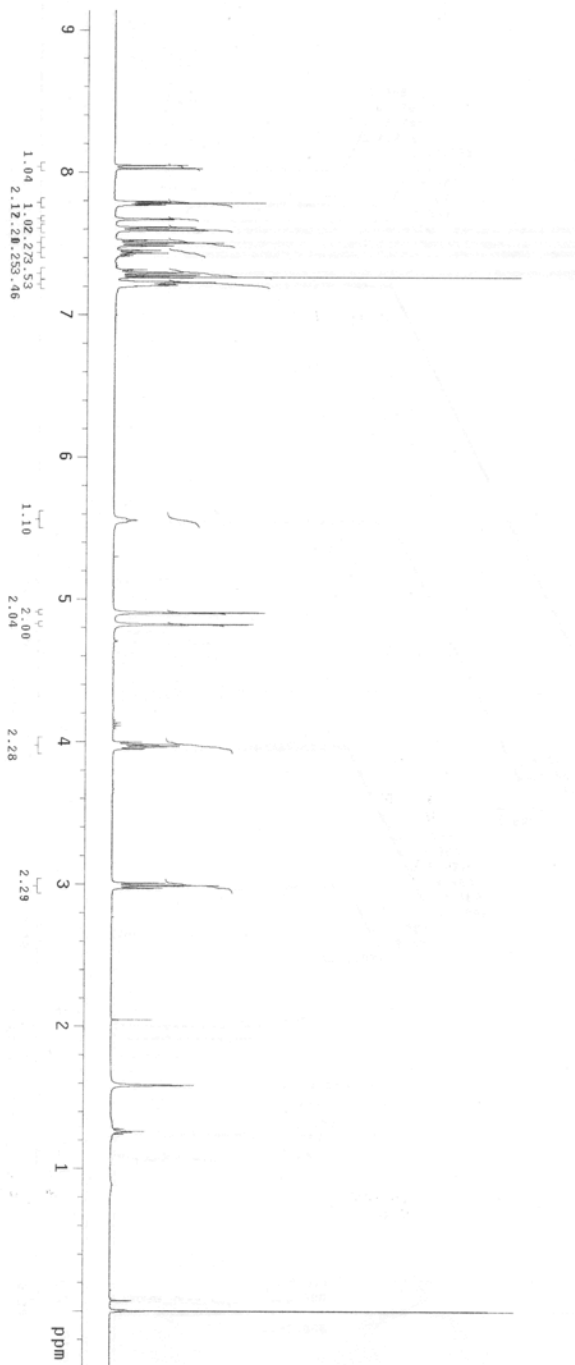

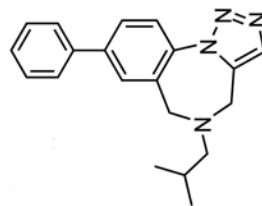

40 (1,2)

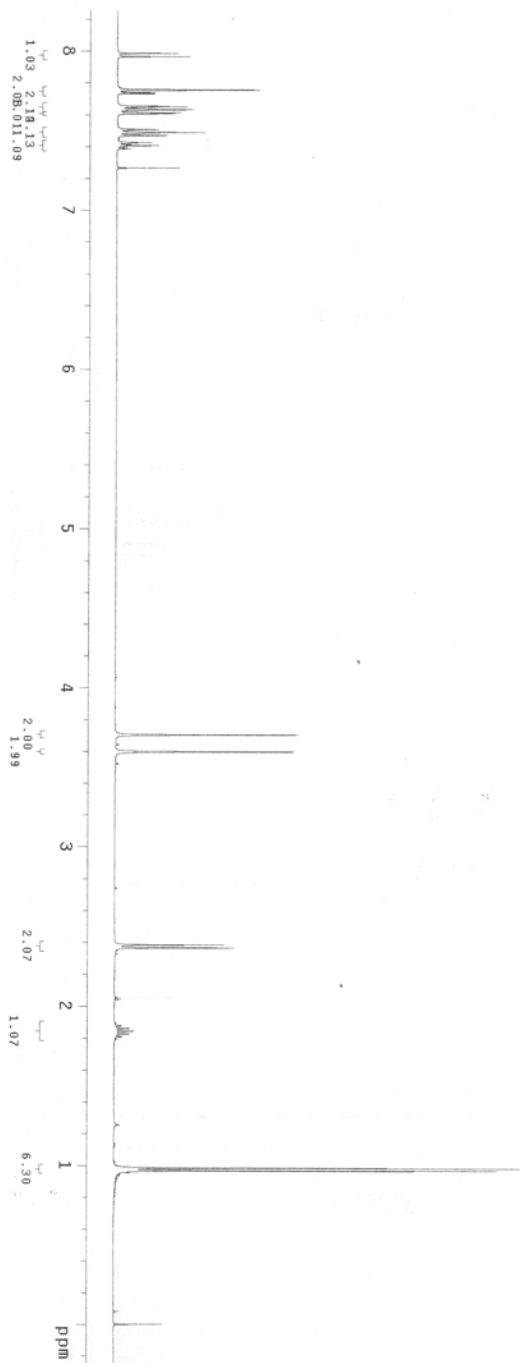

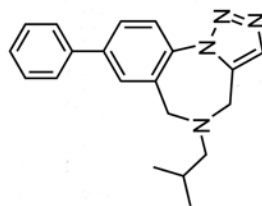

40(1,14)

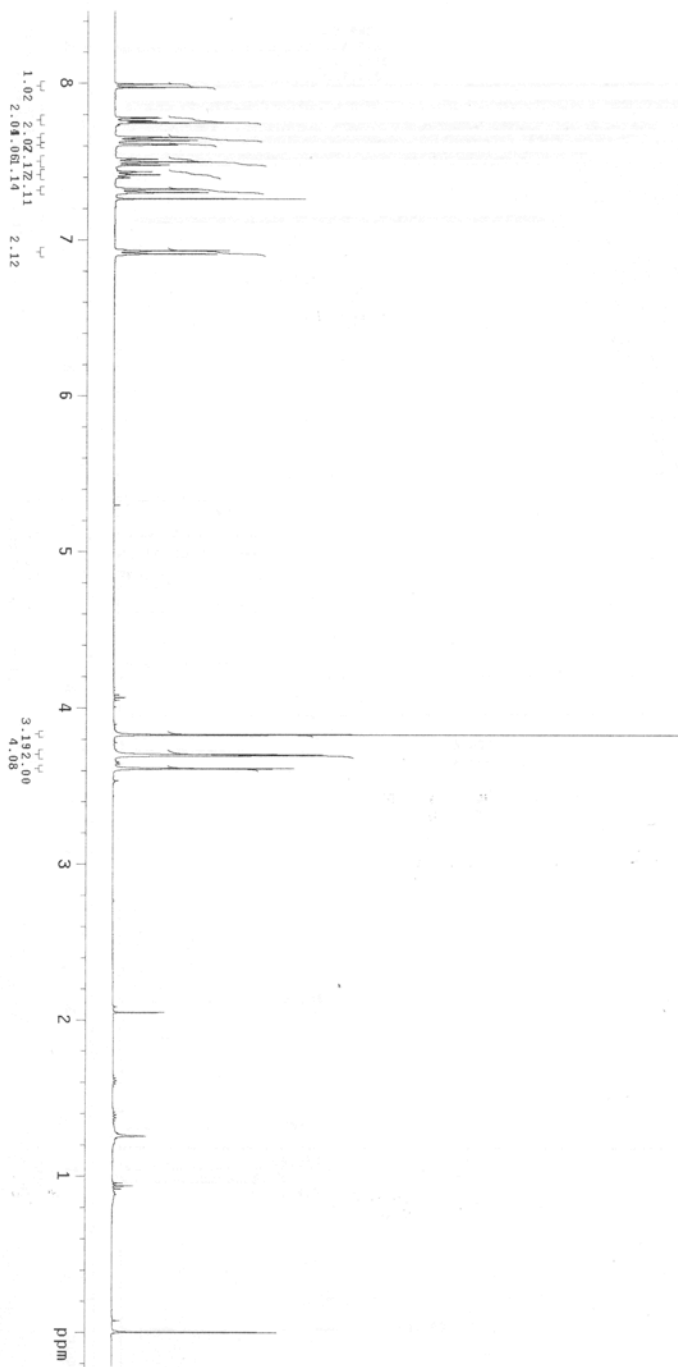

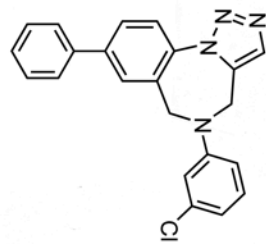

42(1,1)

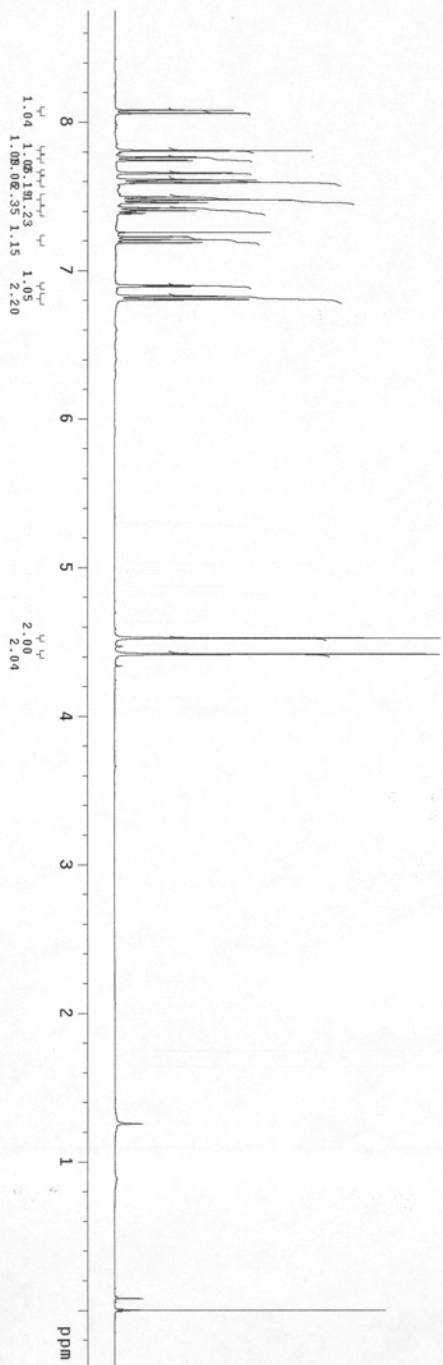

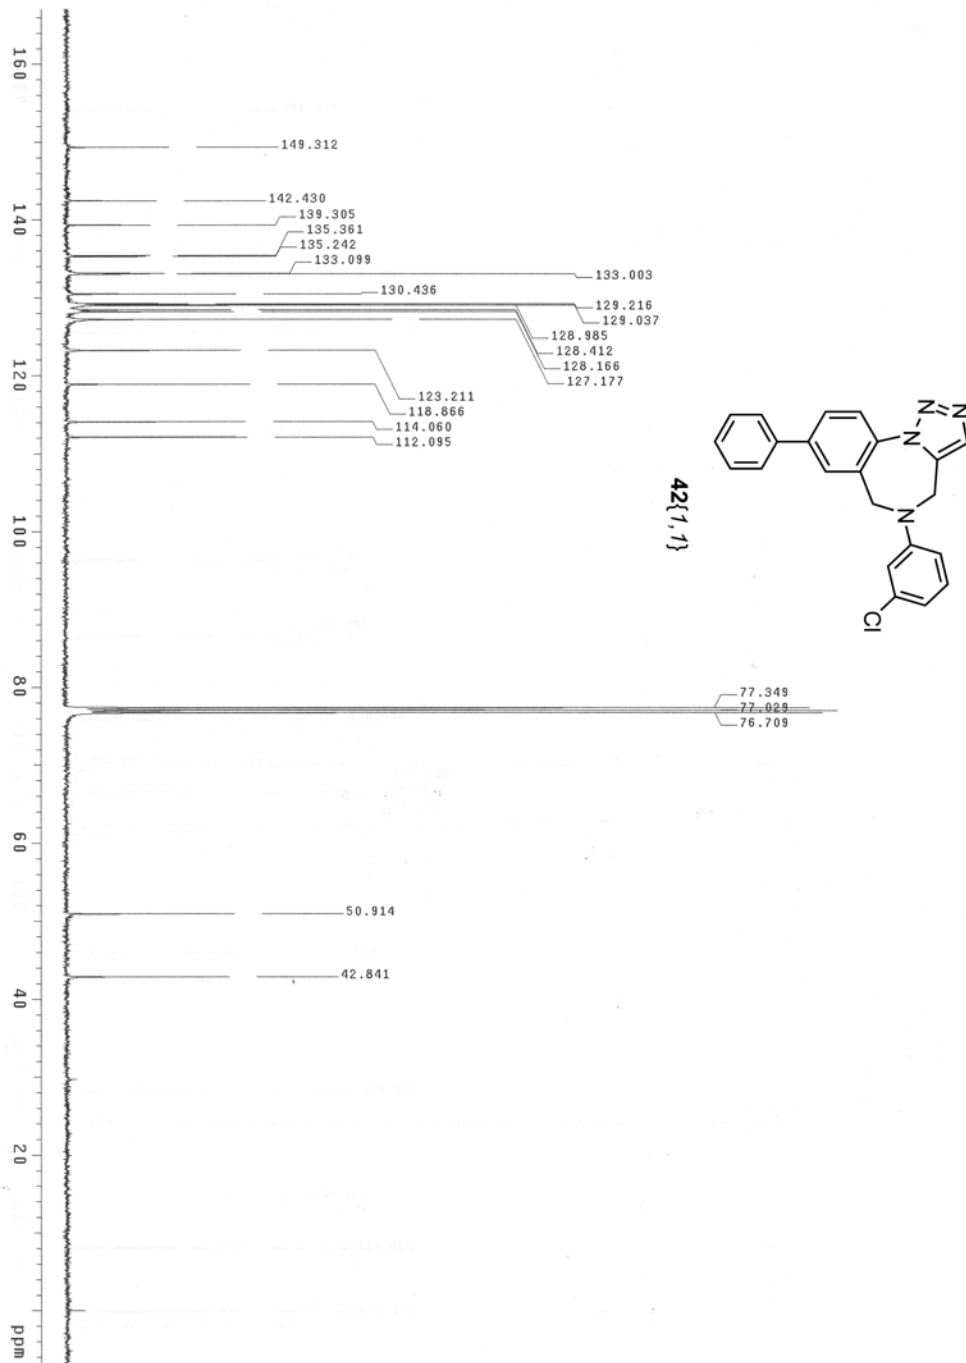

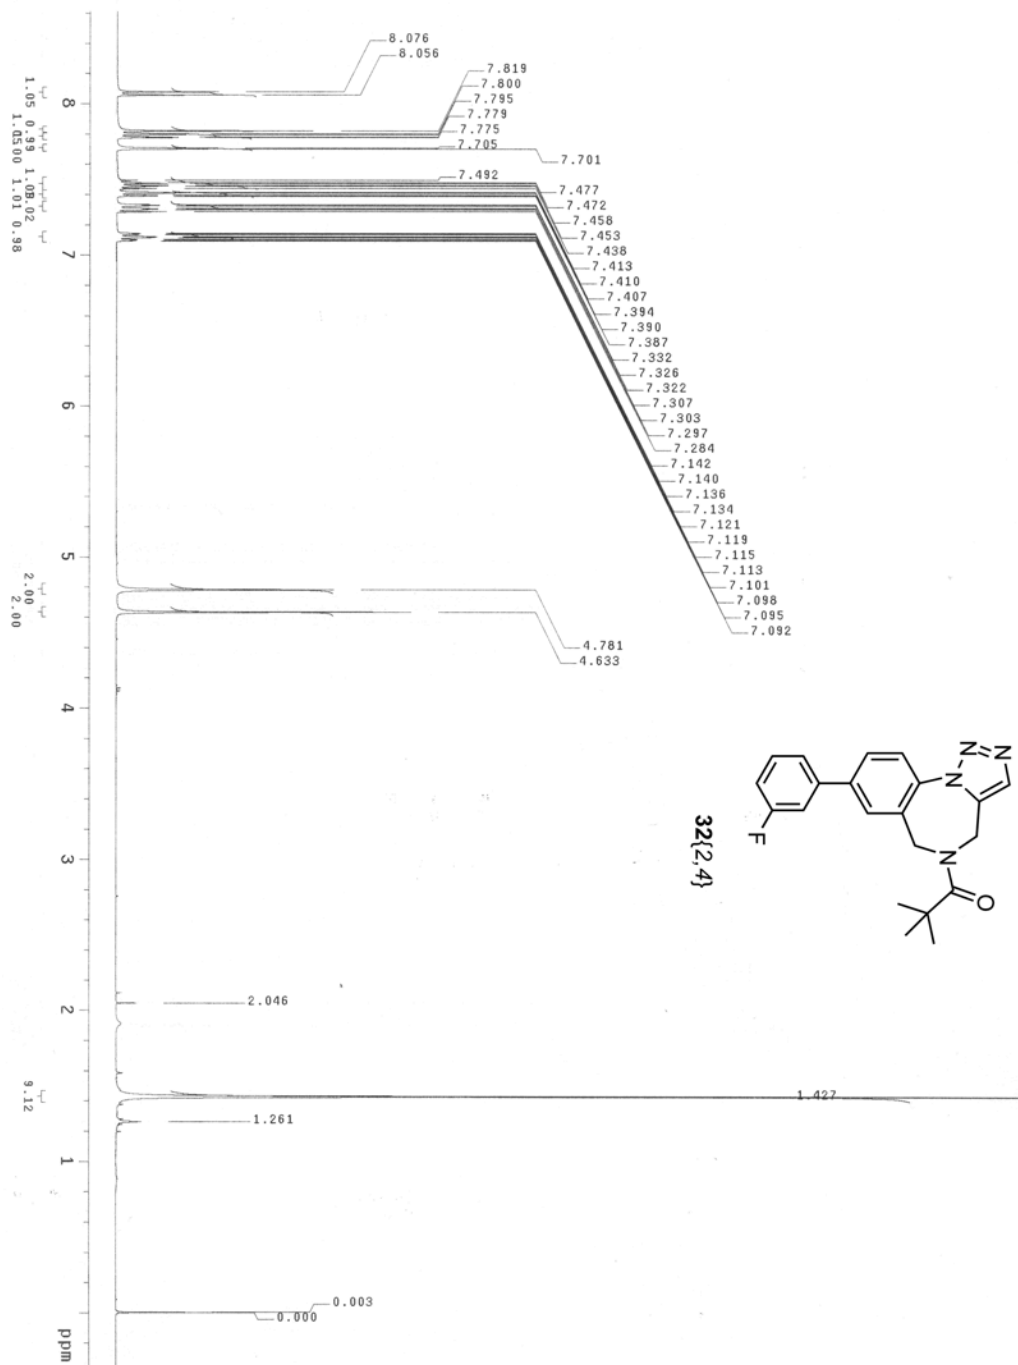

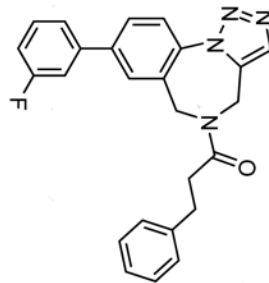

32{2,13}

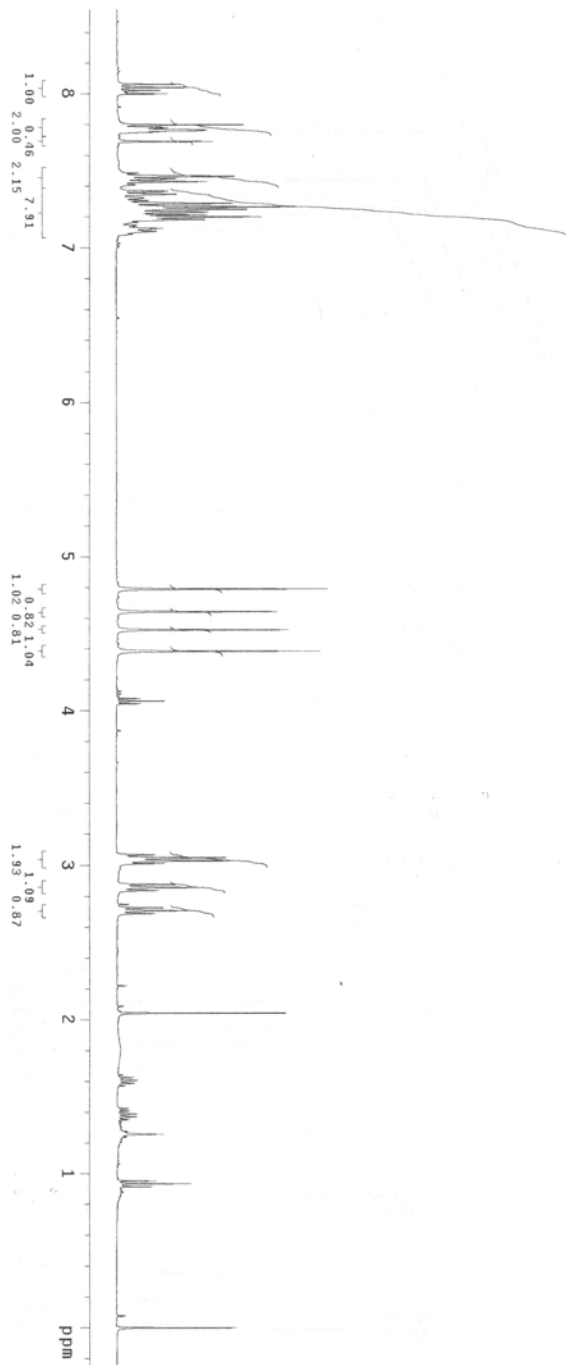

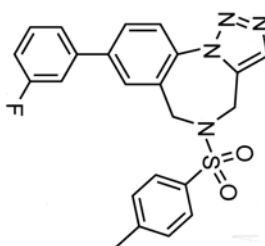

34{2,5}

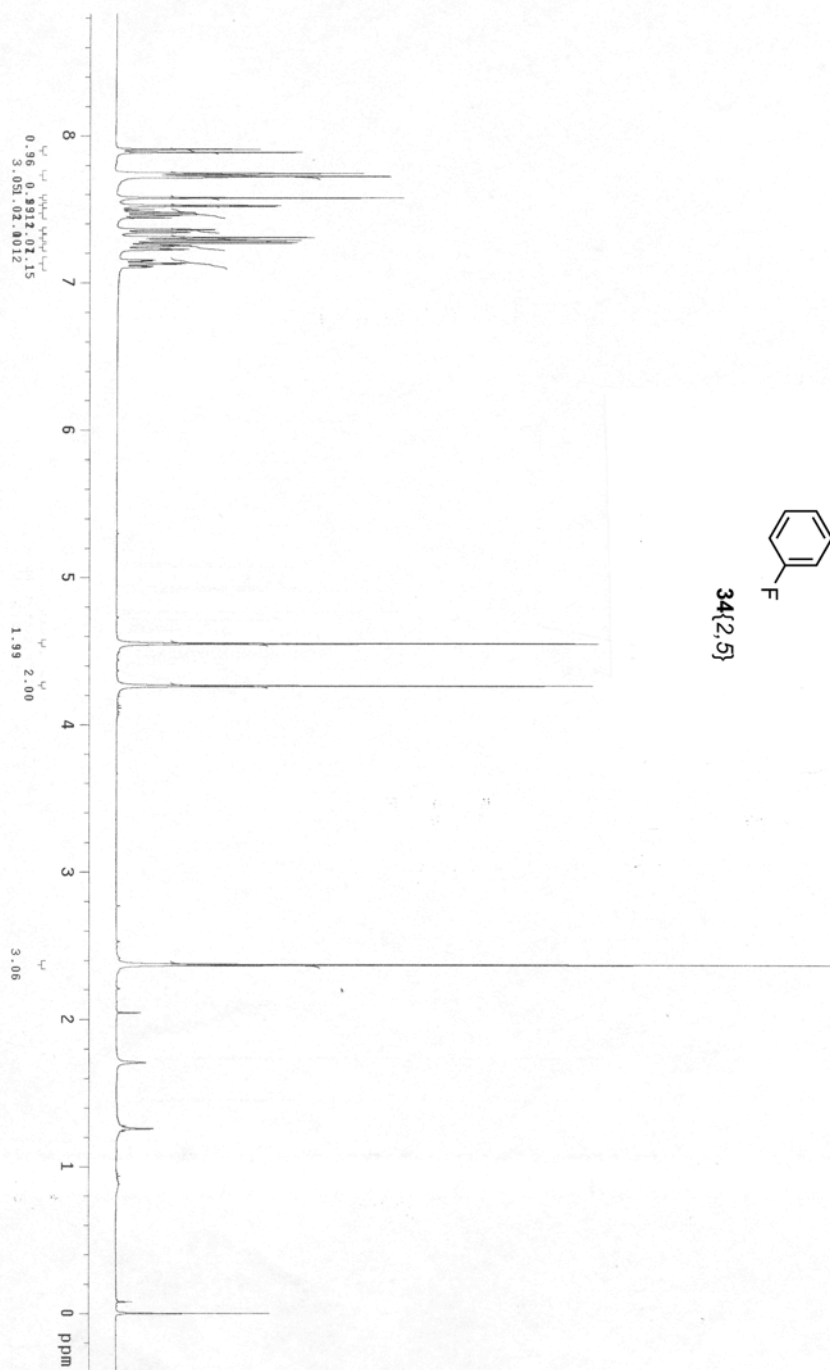



220  
200  
180  
160  
140  
120  
100  
80  
60  
40  
20  
0 ppm

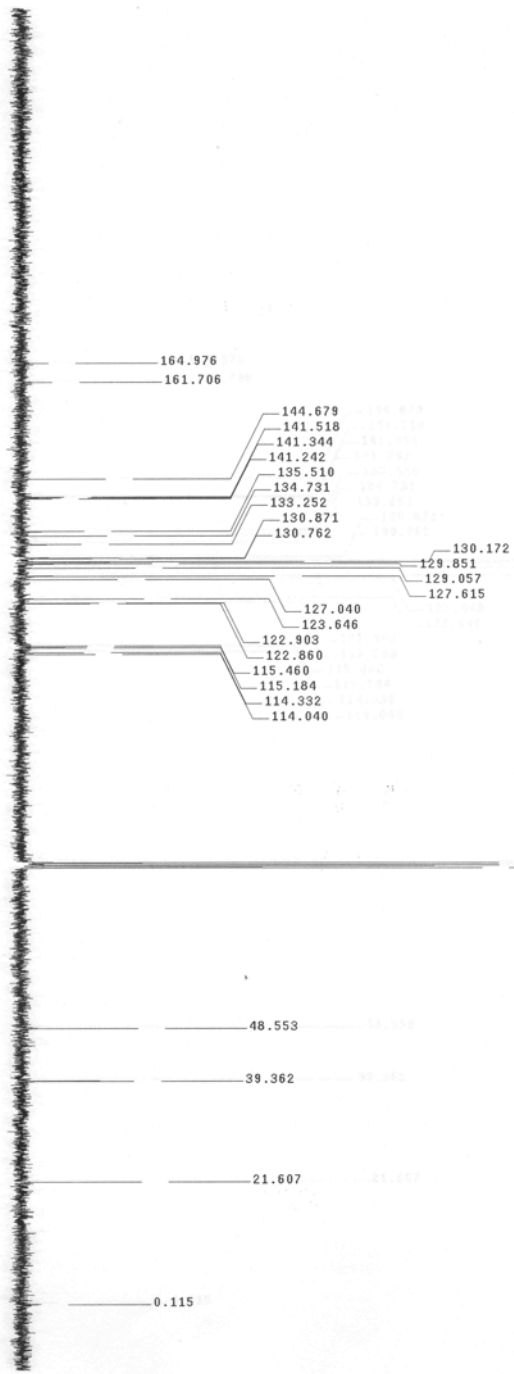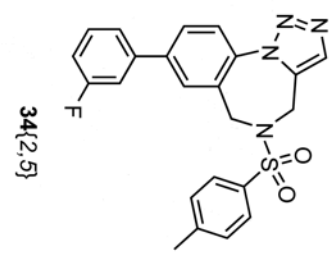

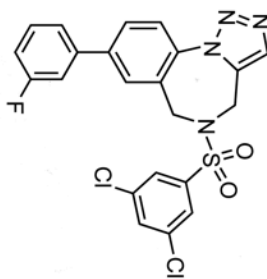

34{2,11}

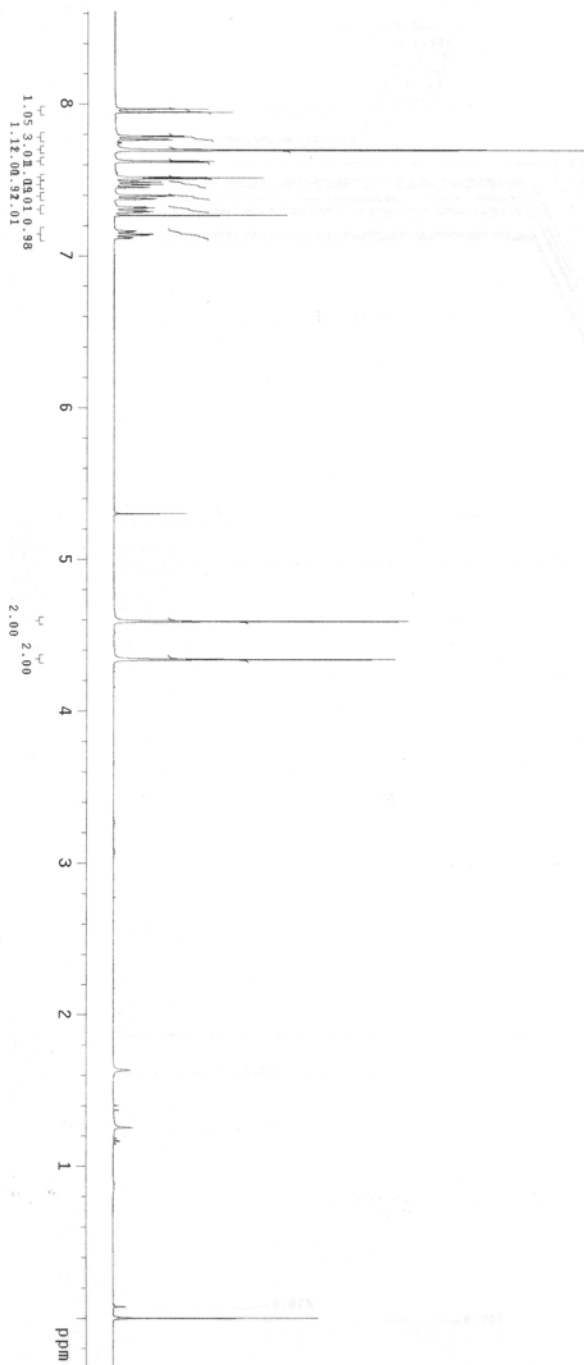

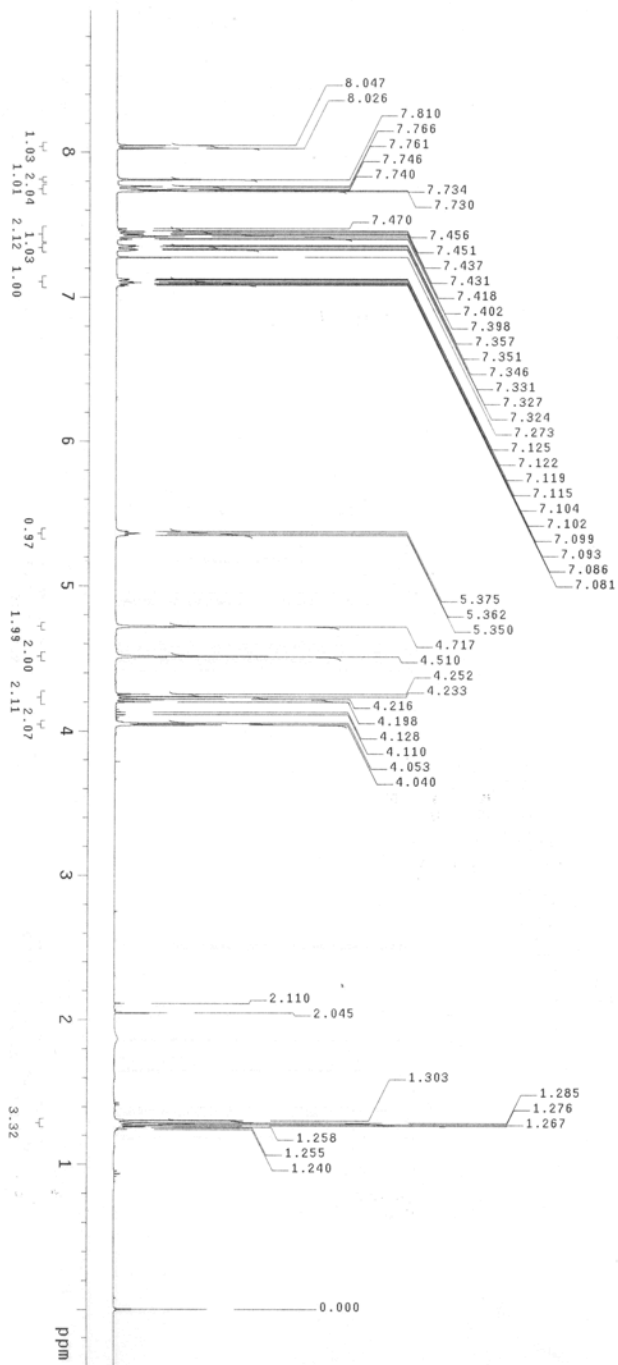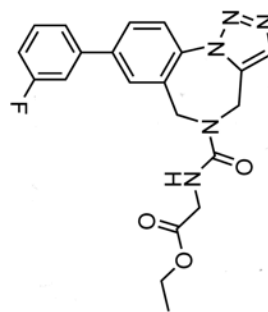

36(2,2)

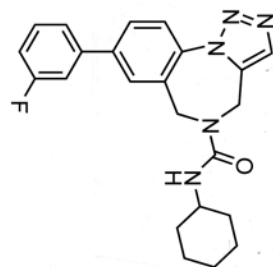

36{2,3}

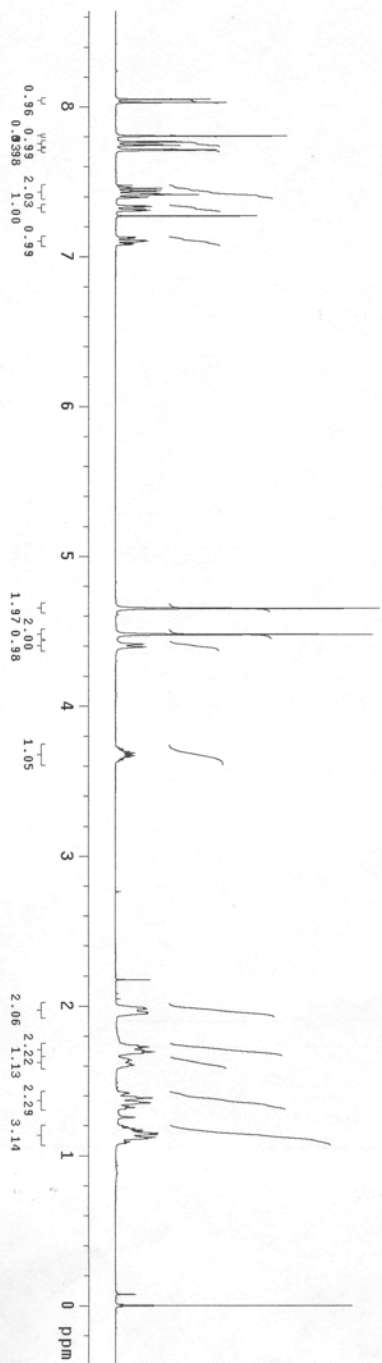

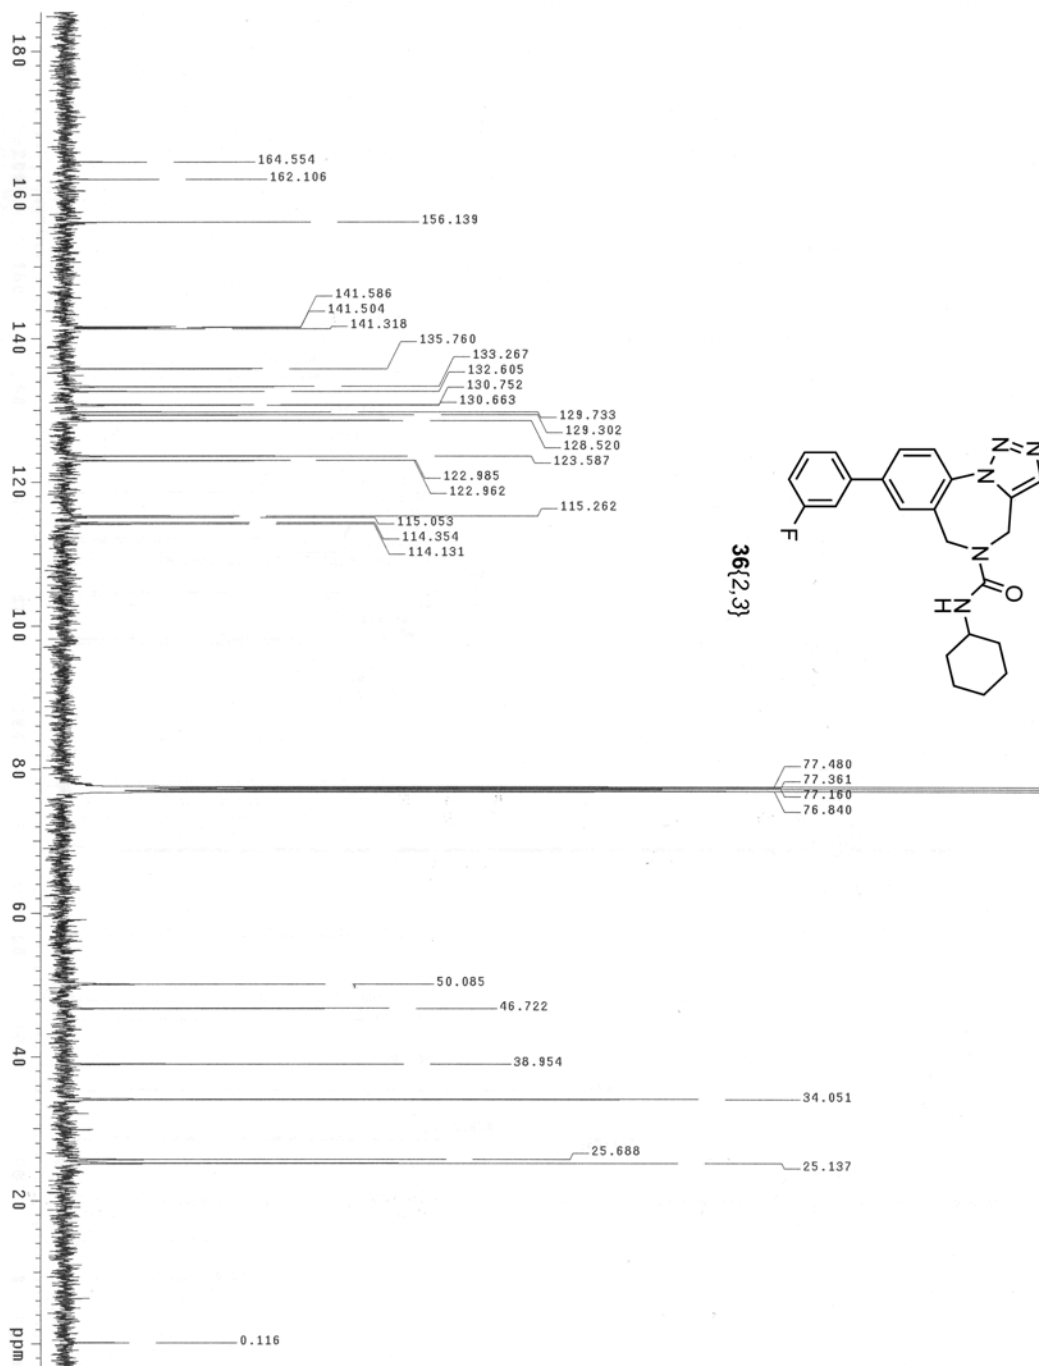

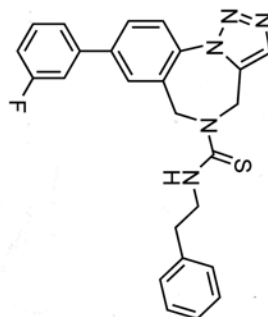

38{2,3}

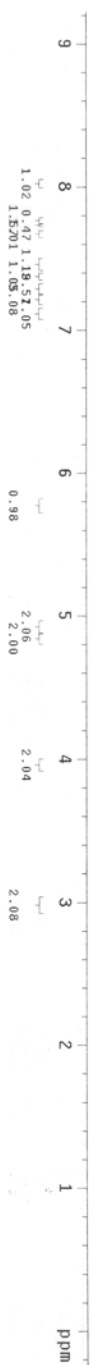

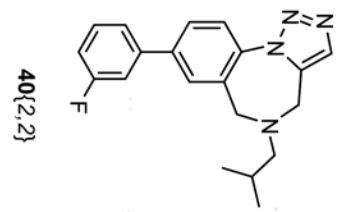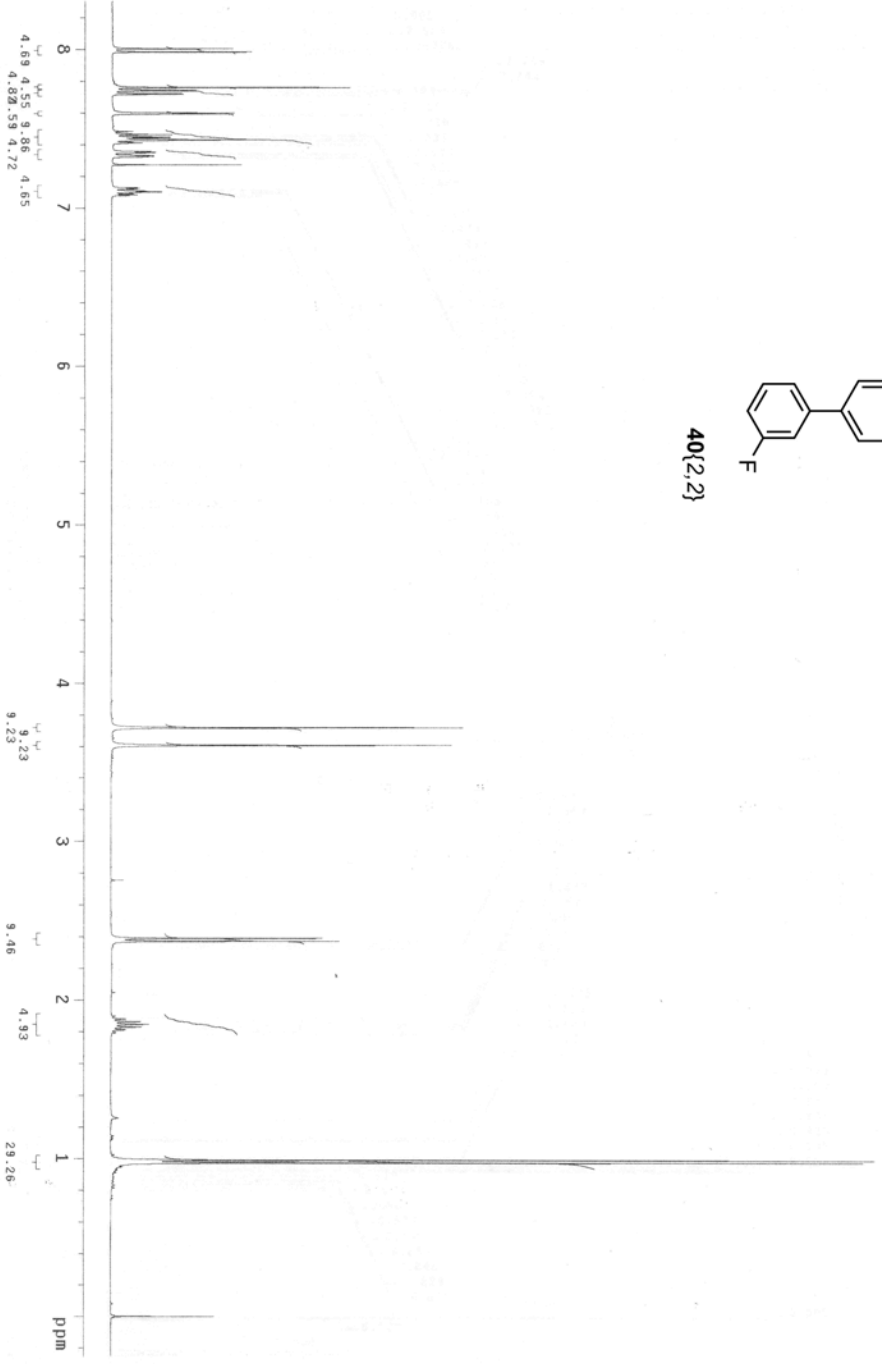

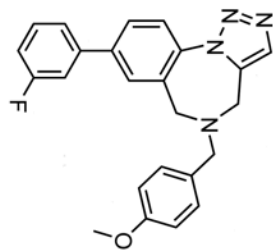

40{2,14}

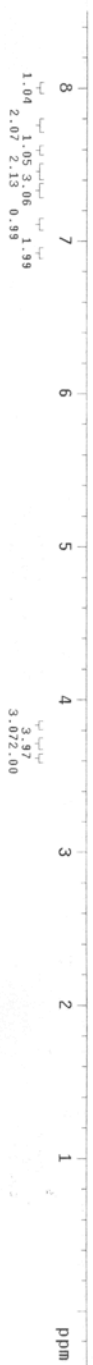



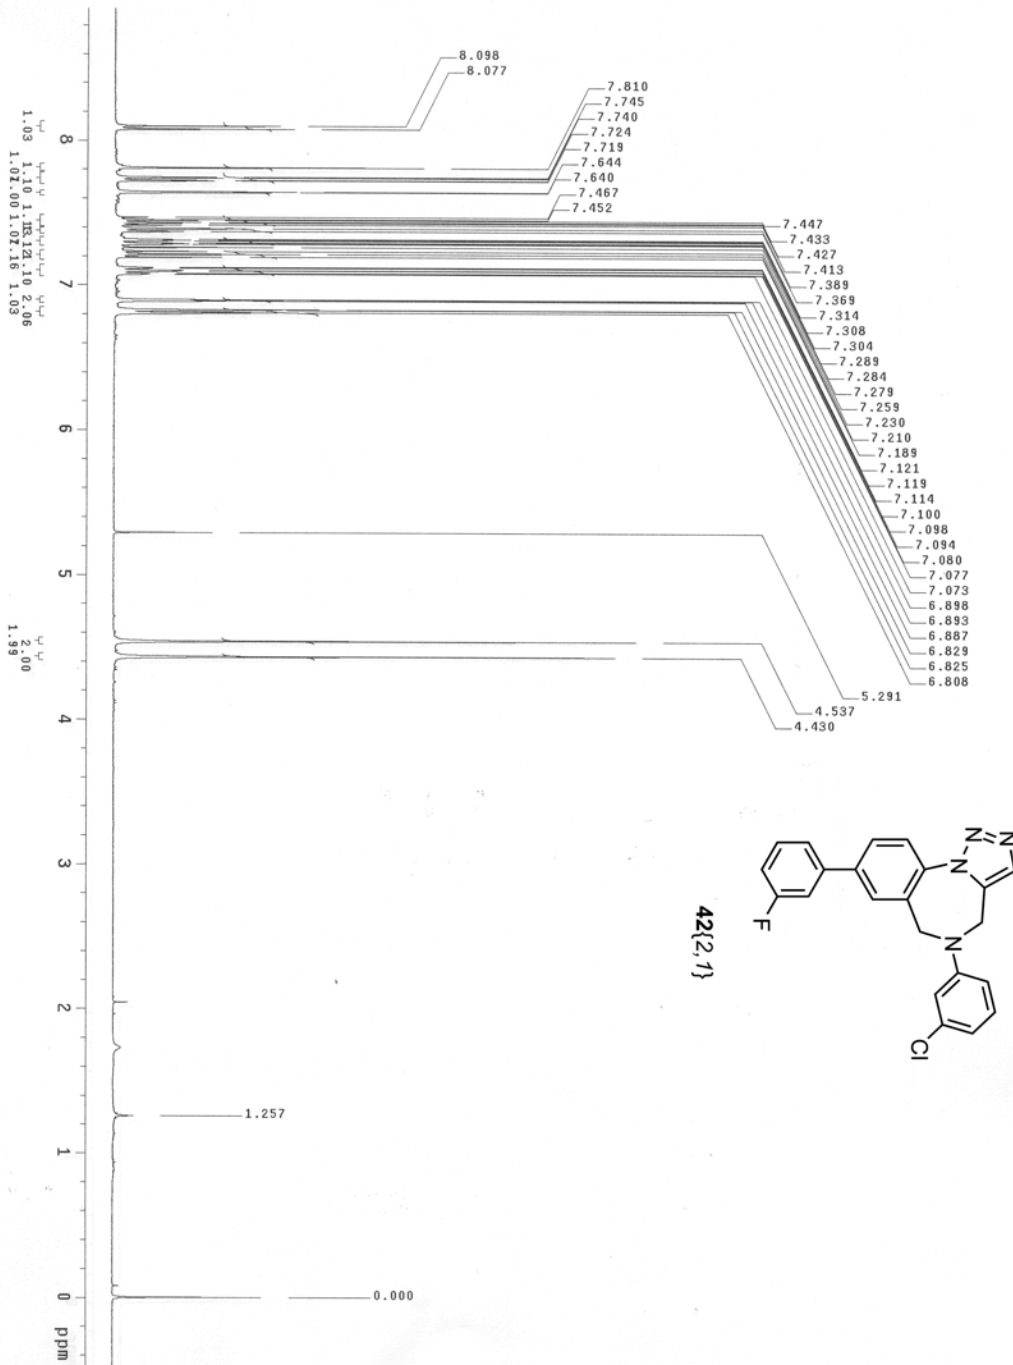

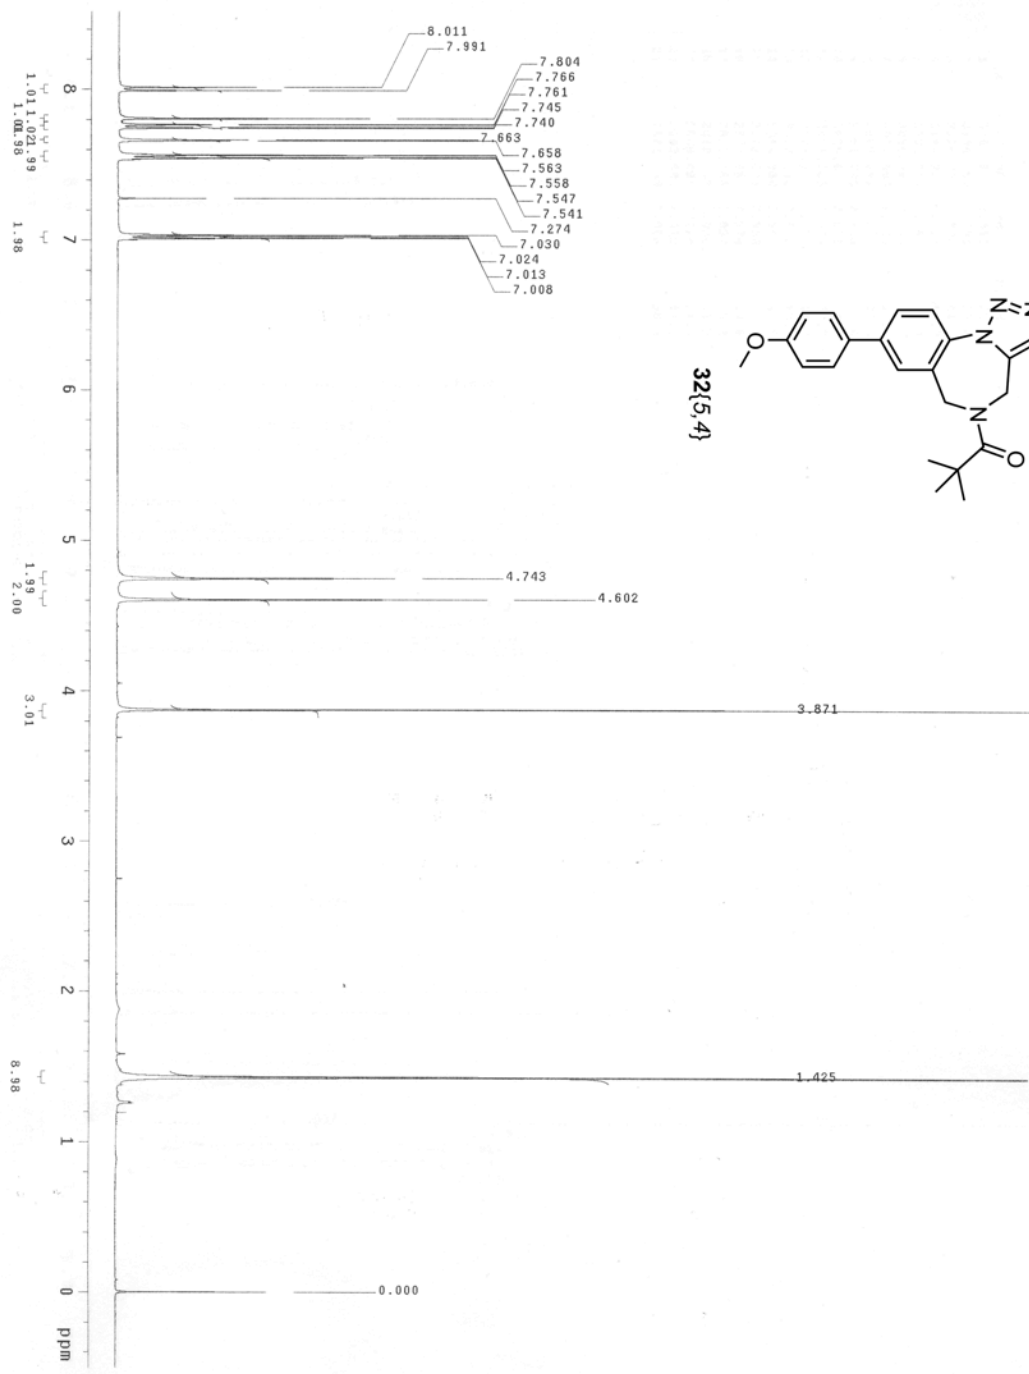

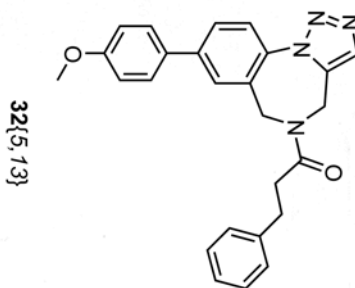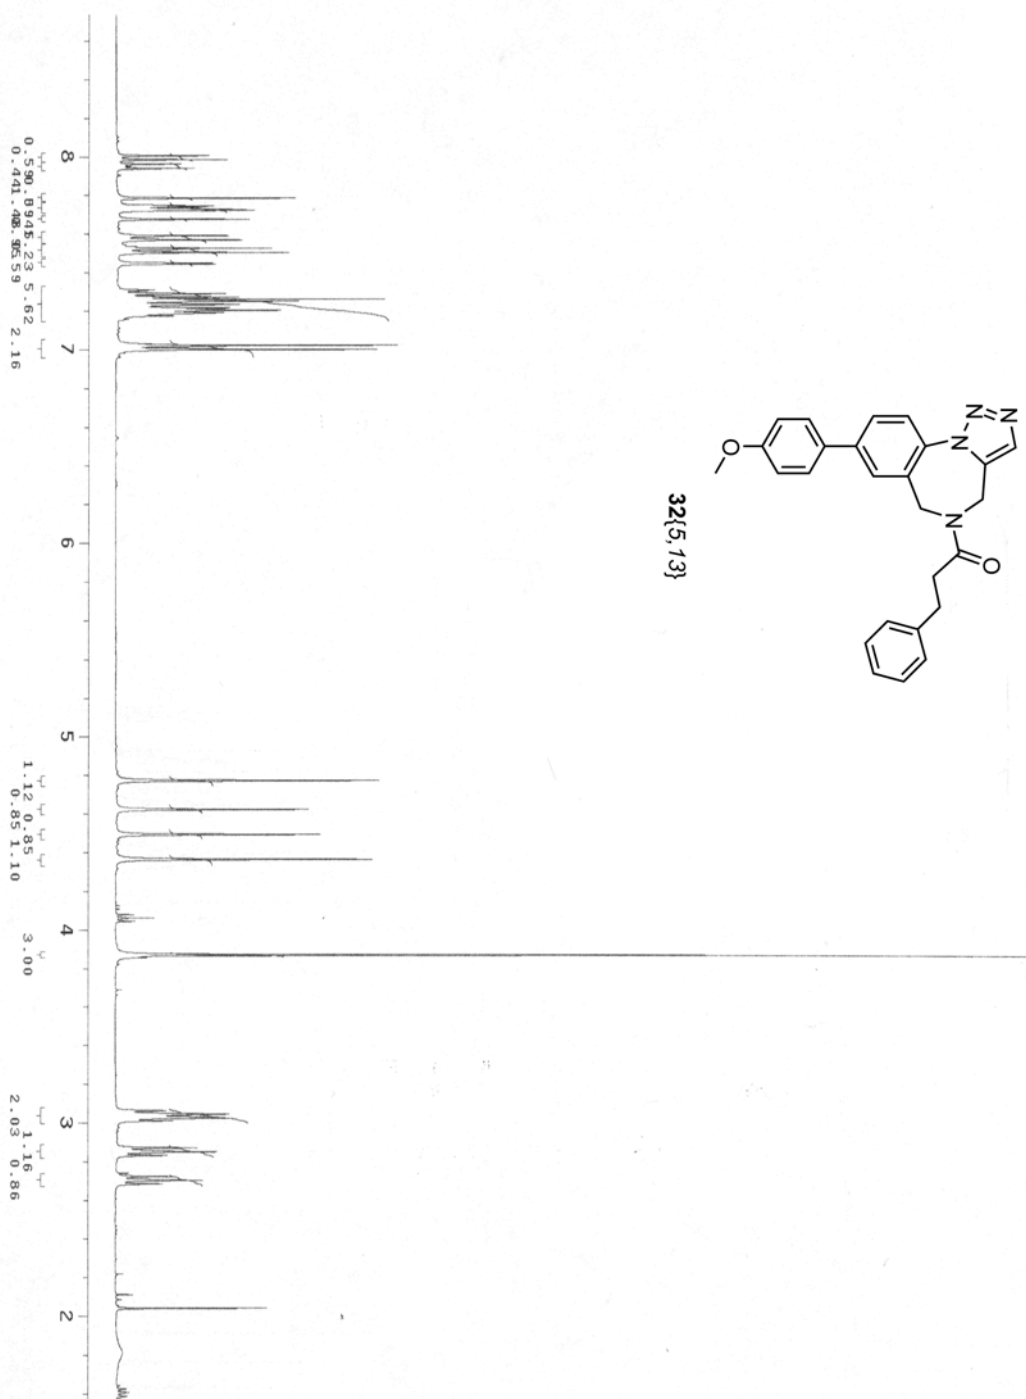

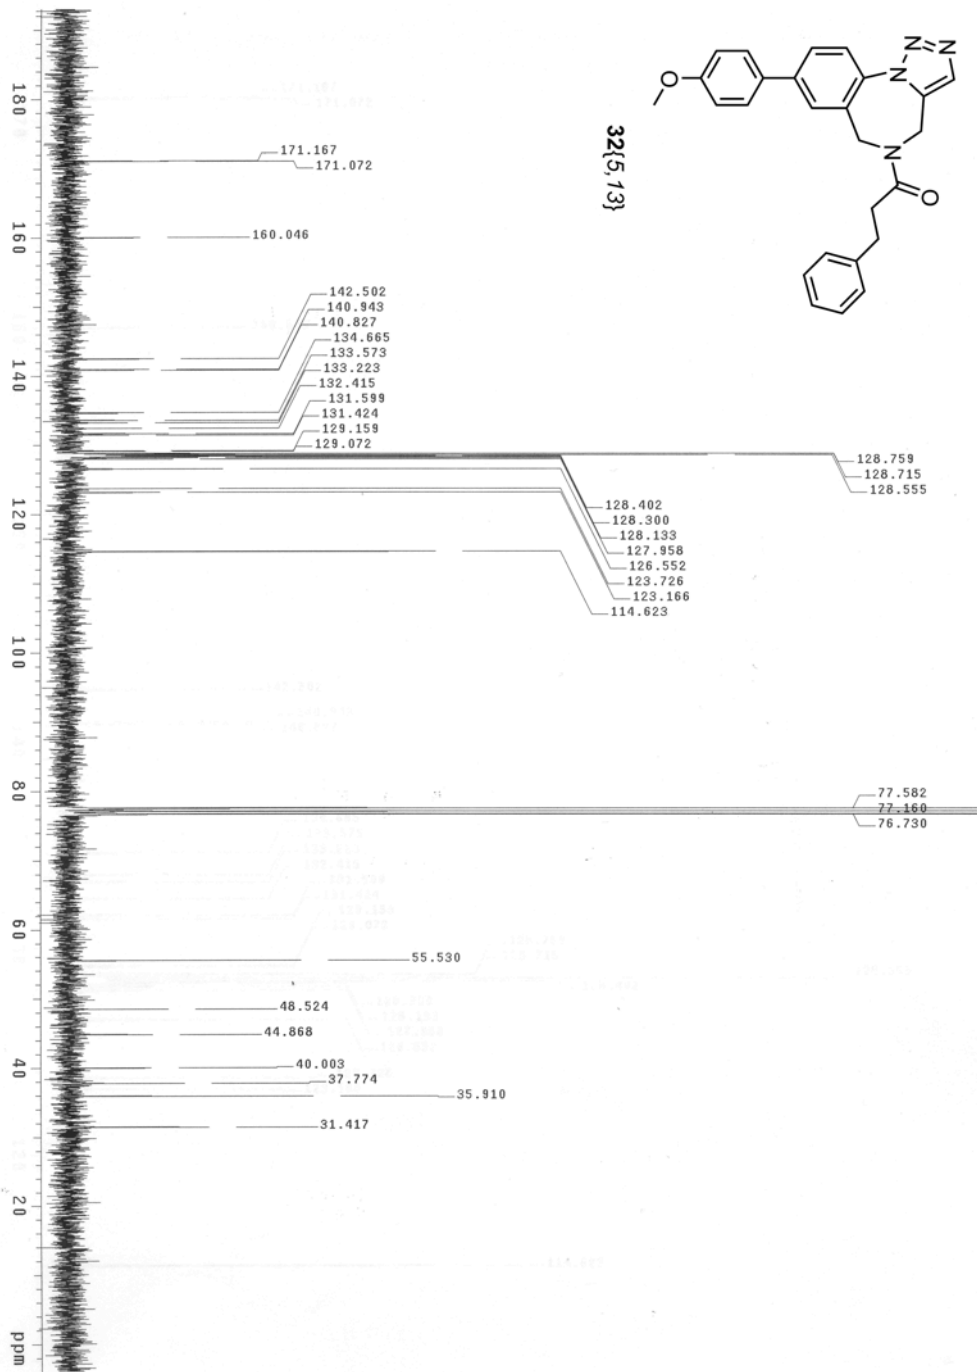

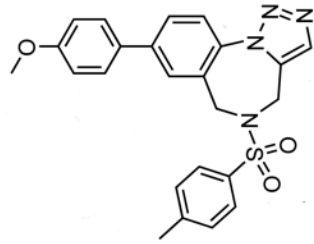

34 (5,5)

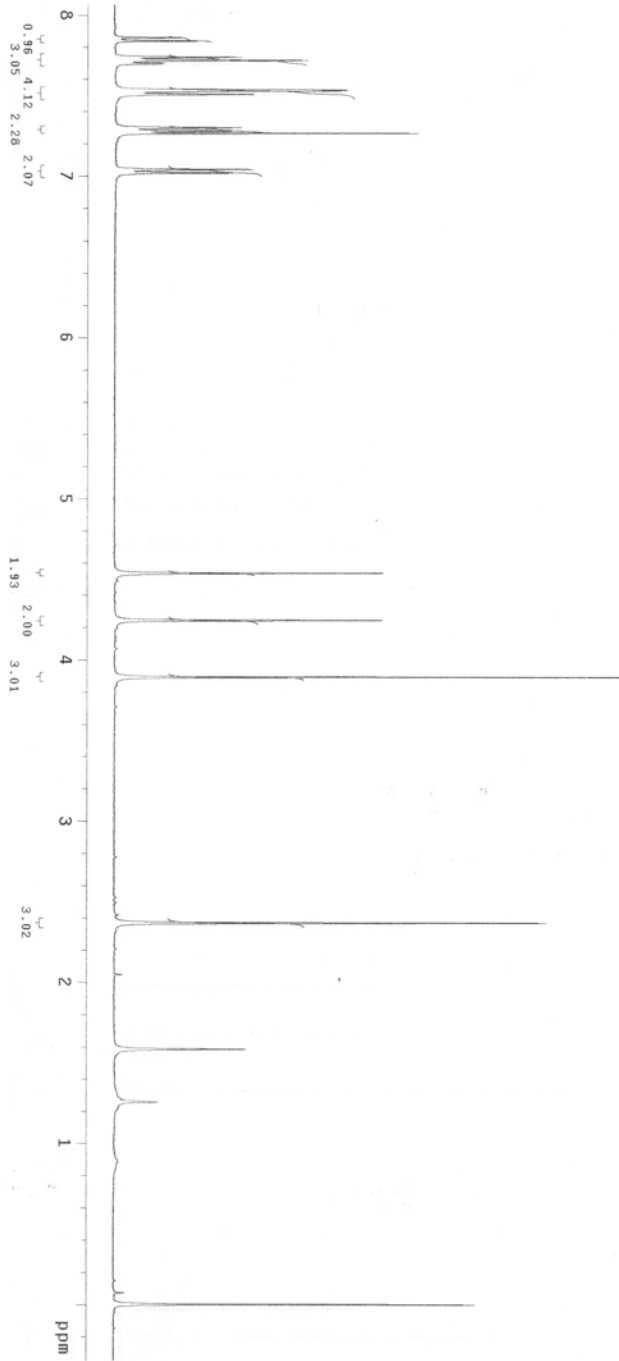

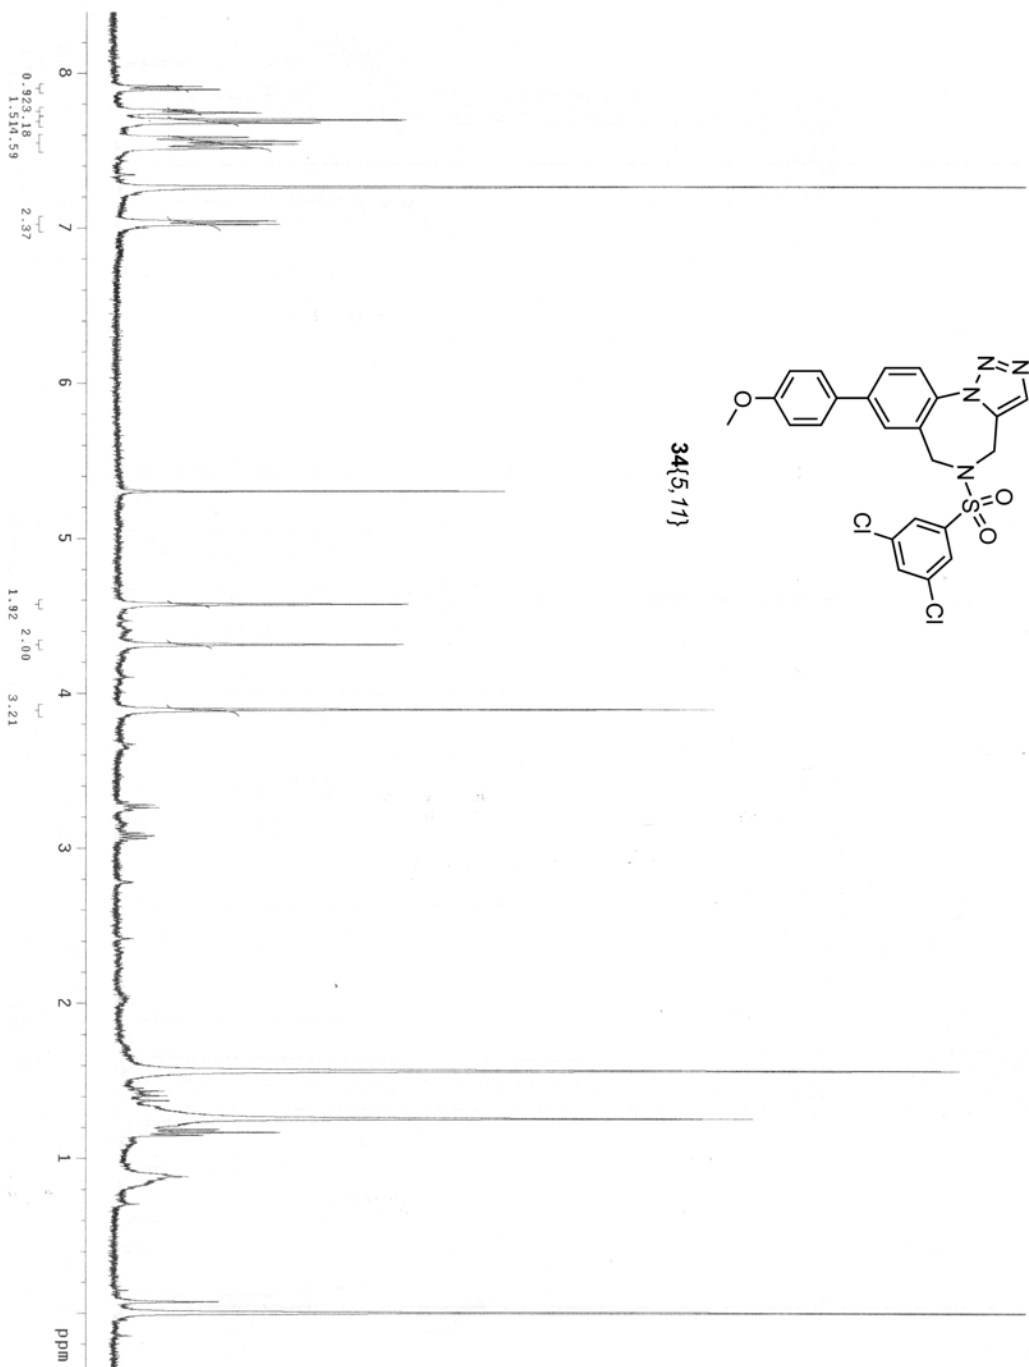

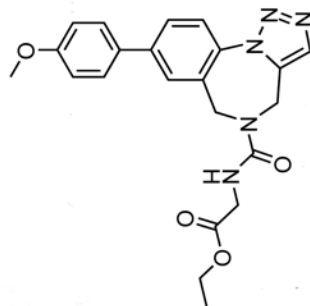

36{5,2}

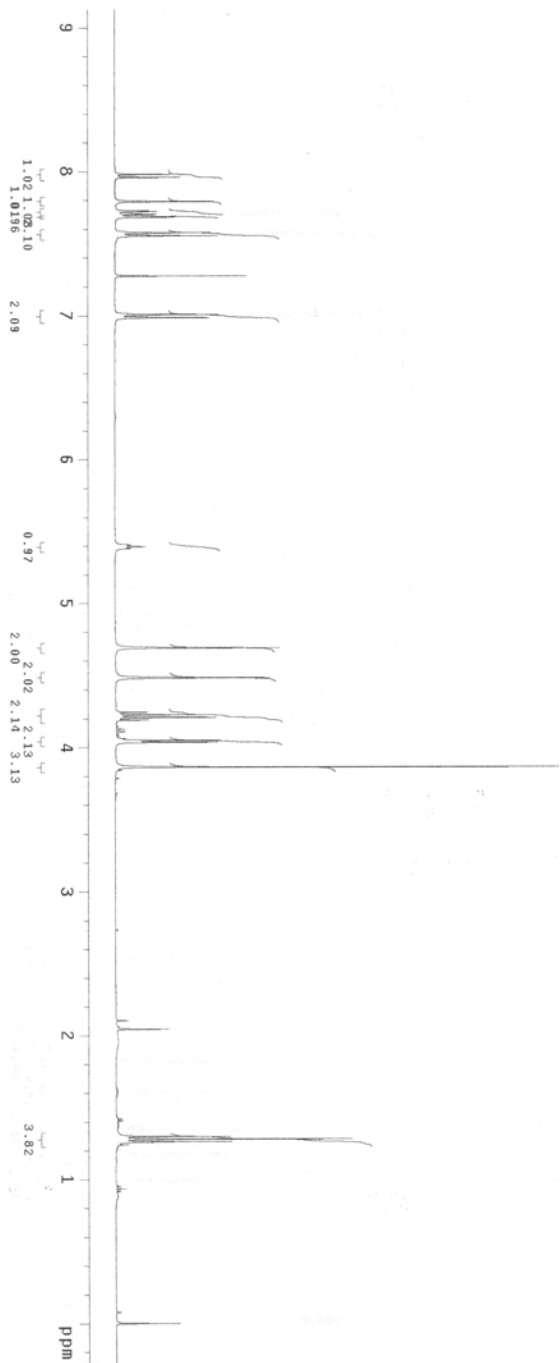

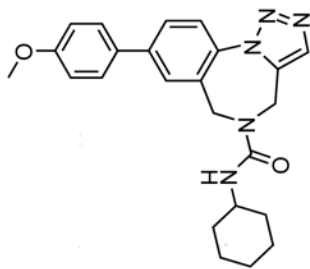

36(5,3)

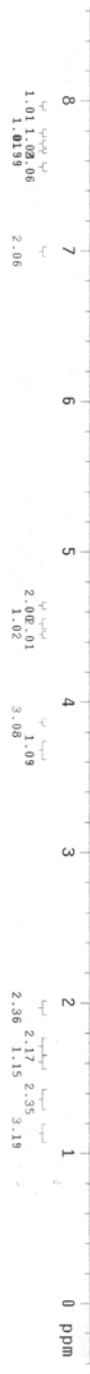



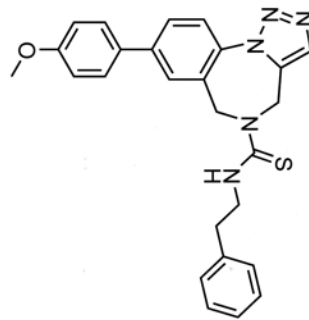

38 (5,3)

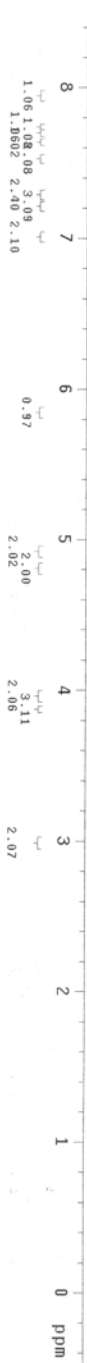

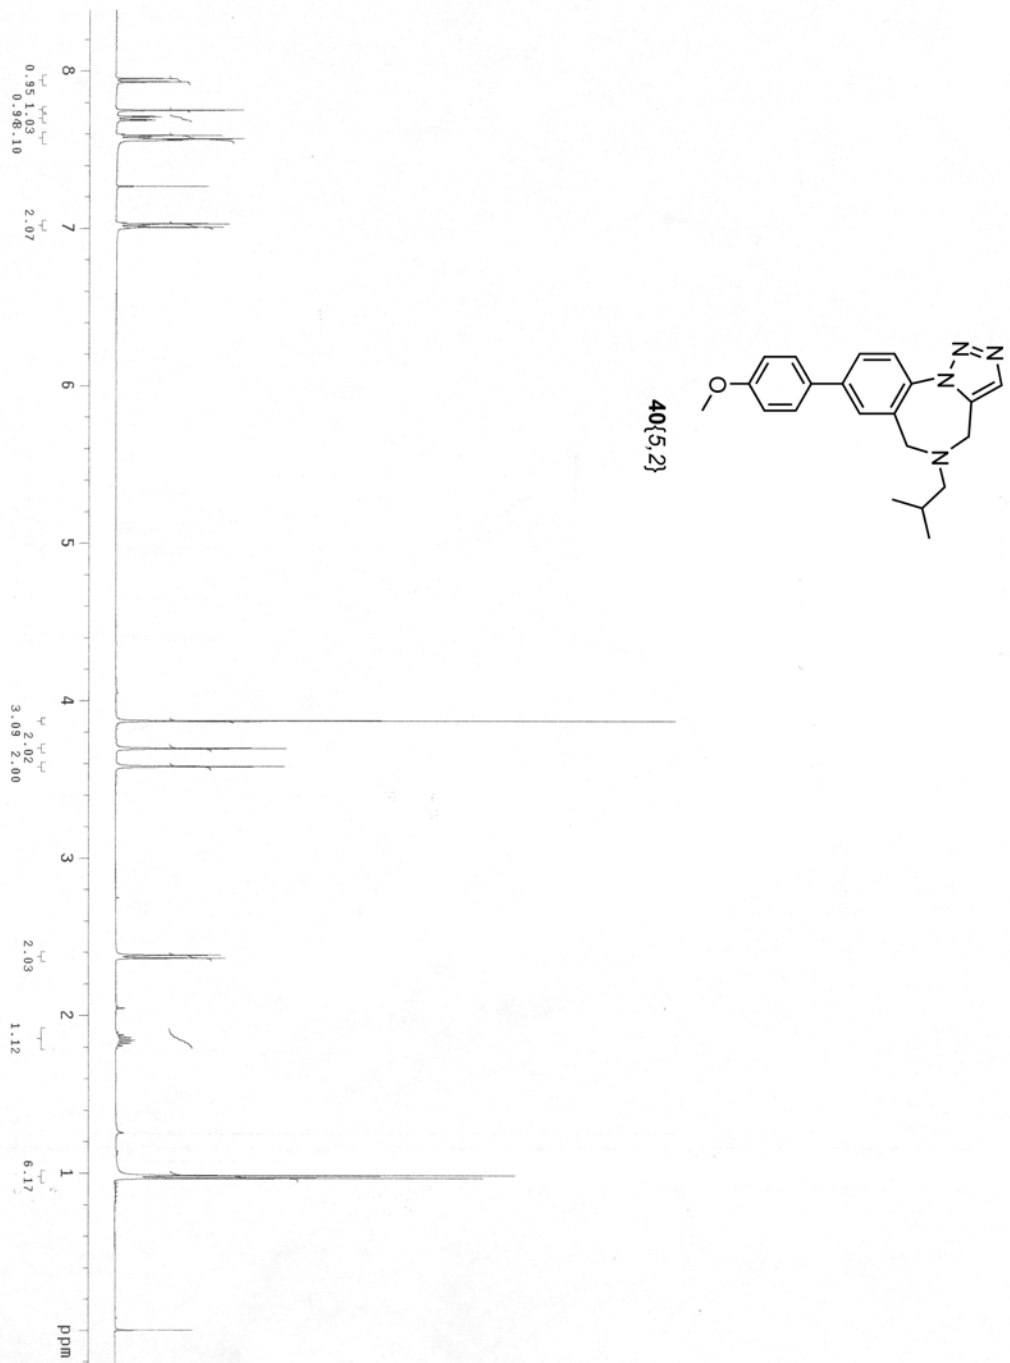

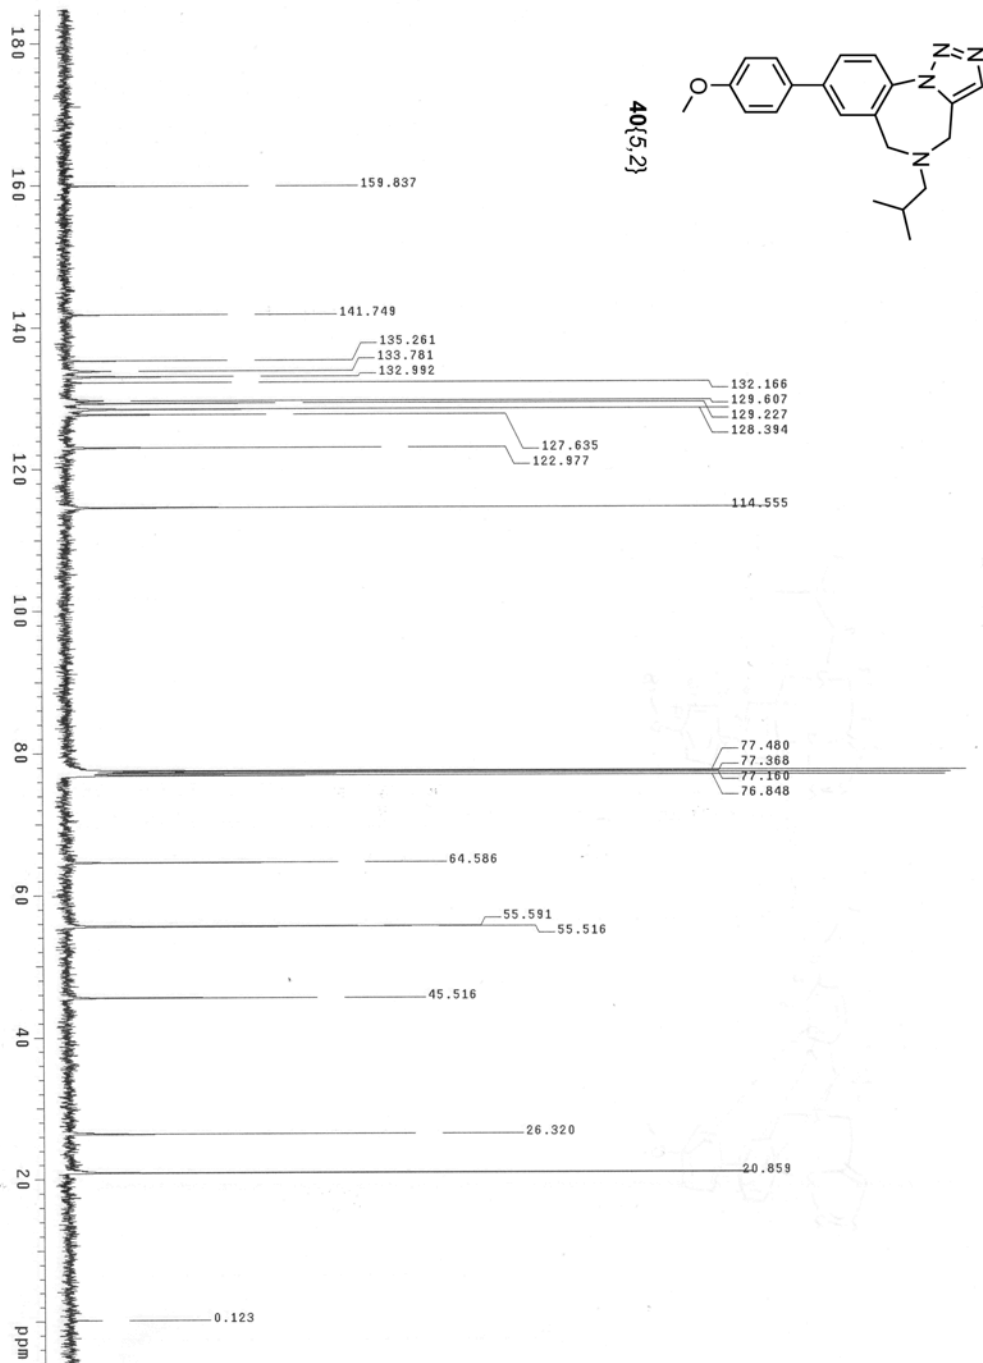

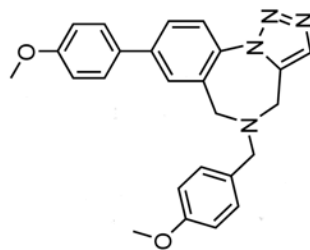

40(5,14)

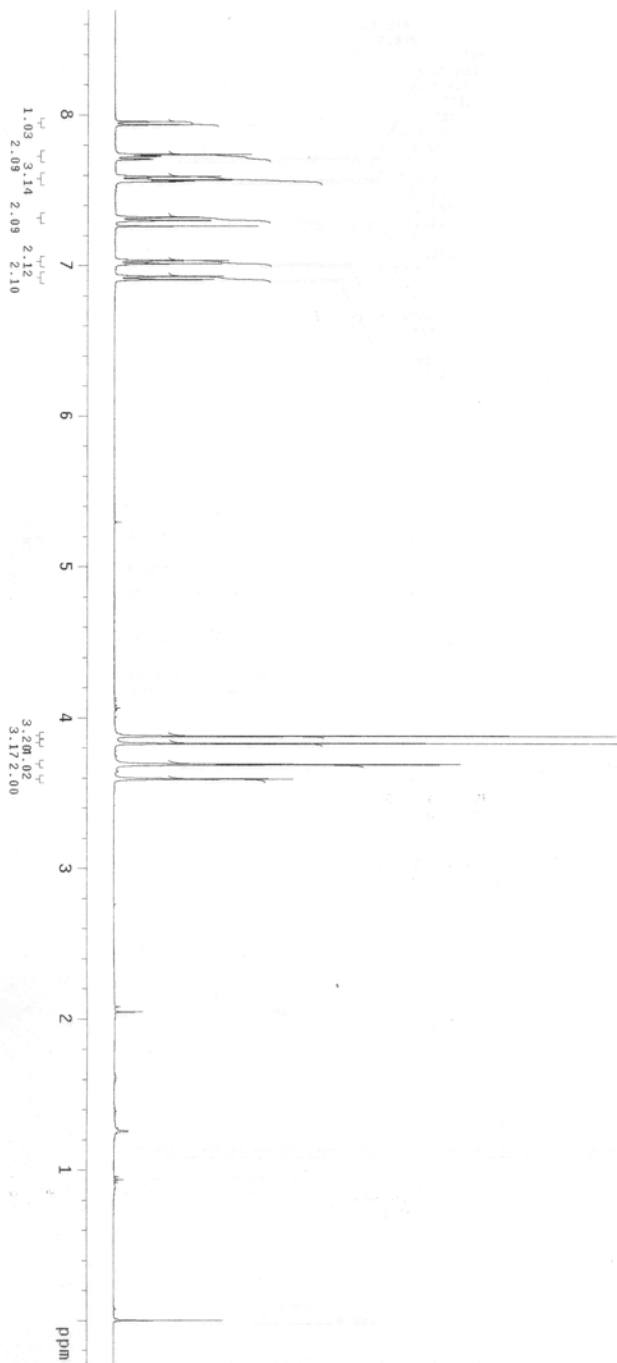

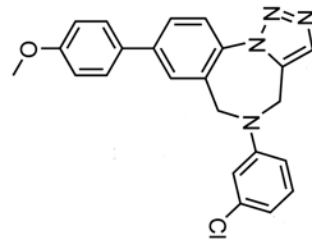

42(5,1)

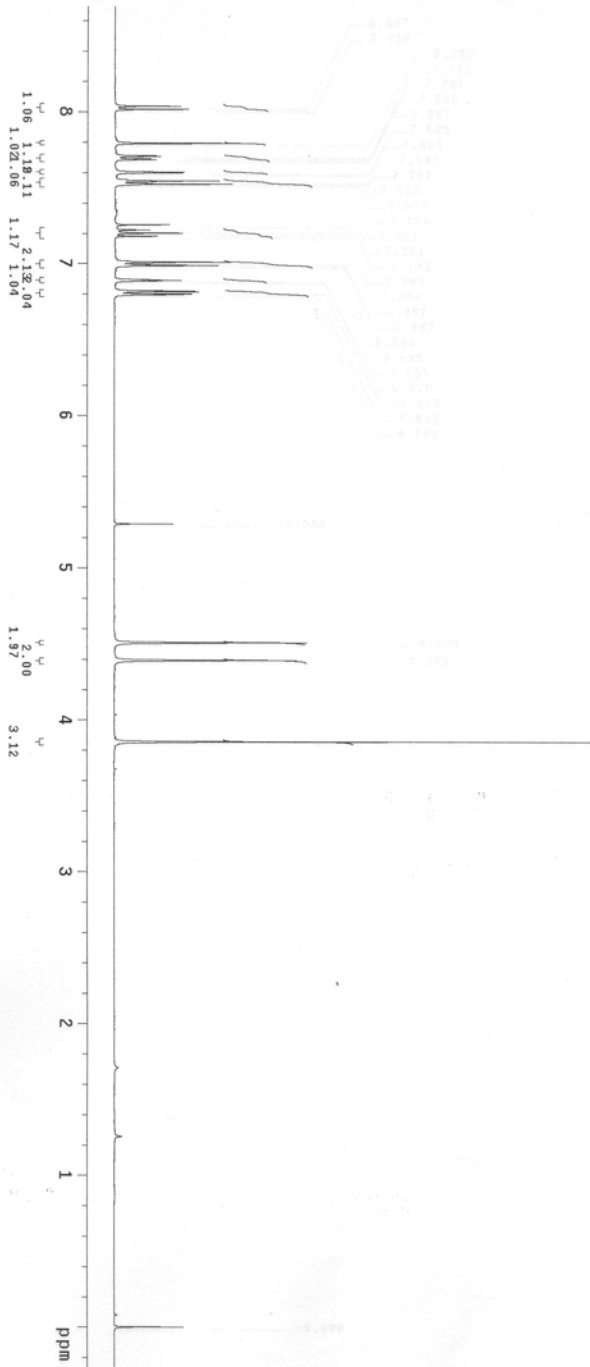

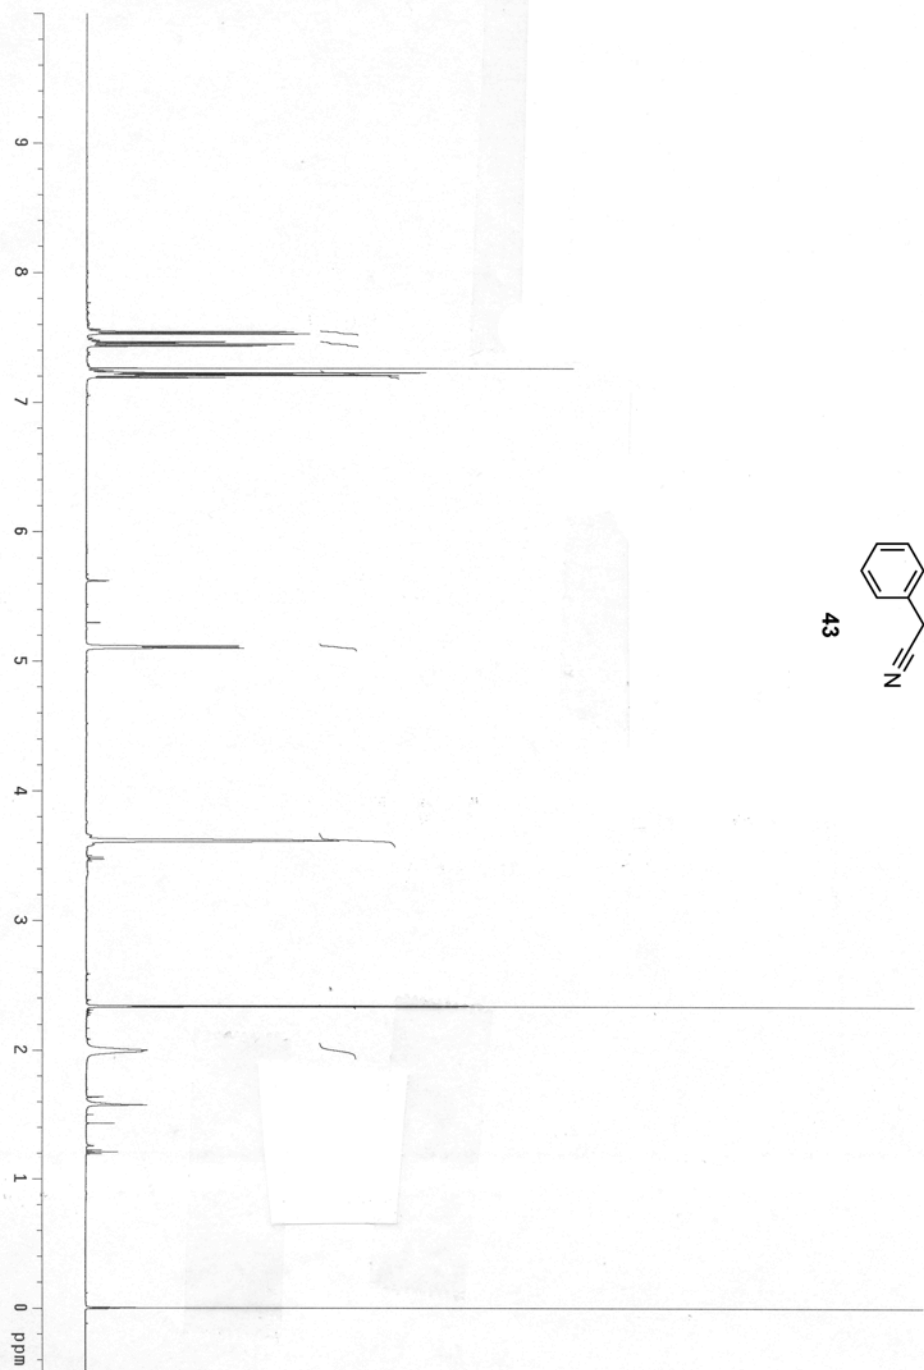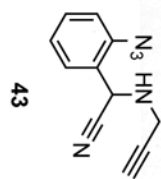

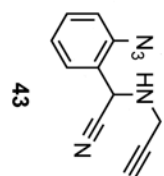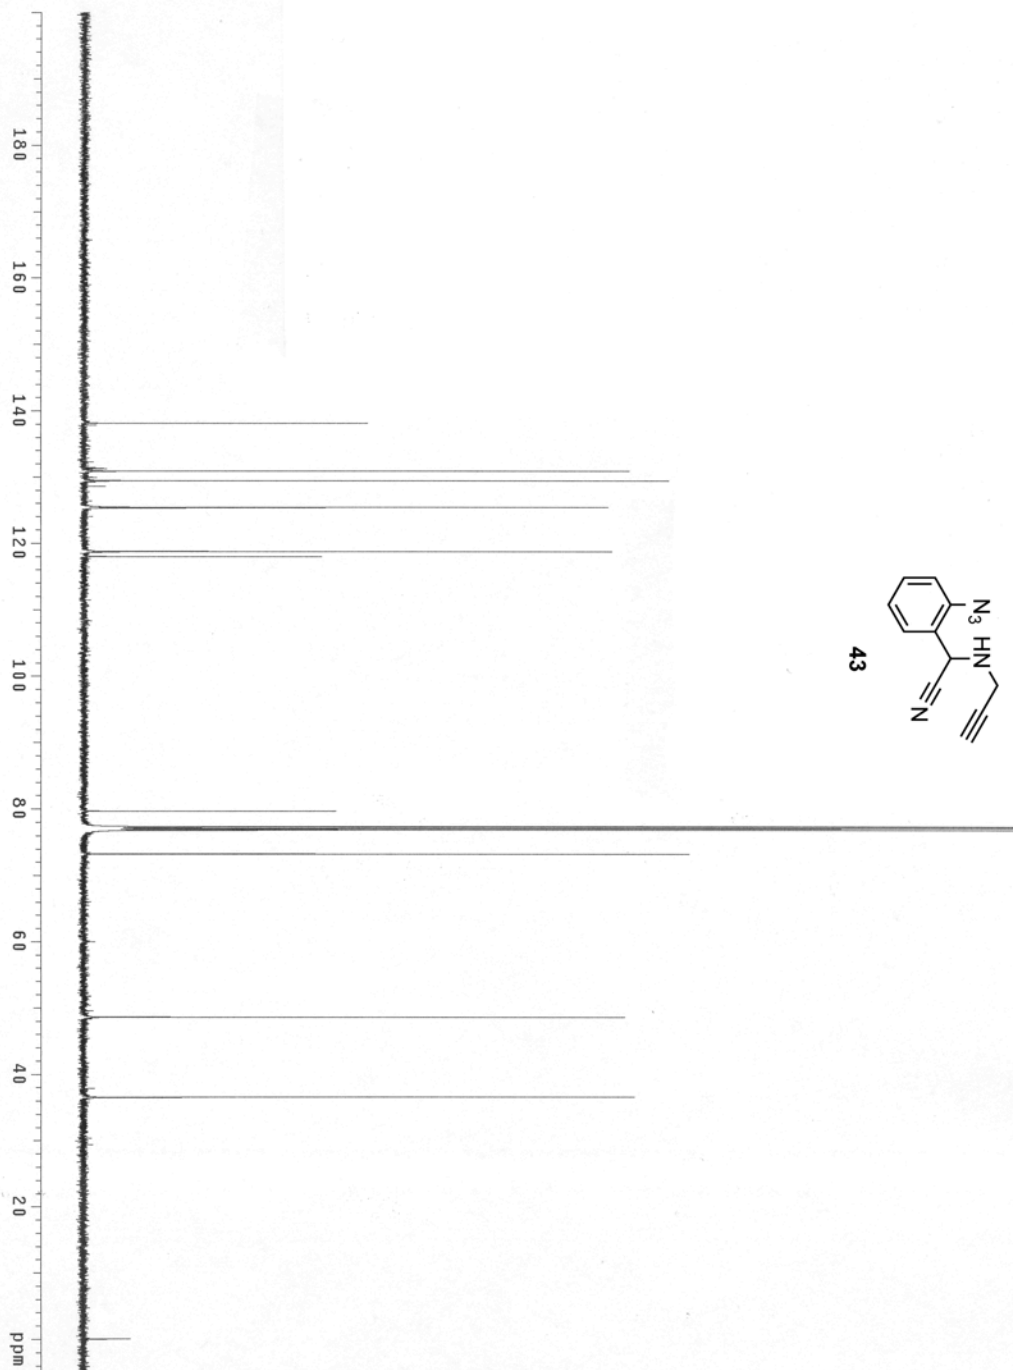

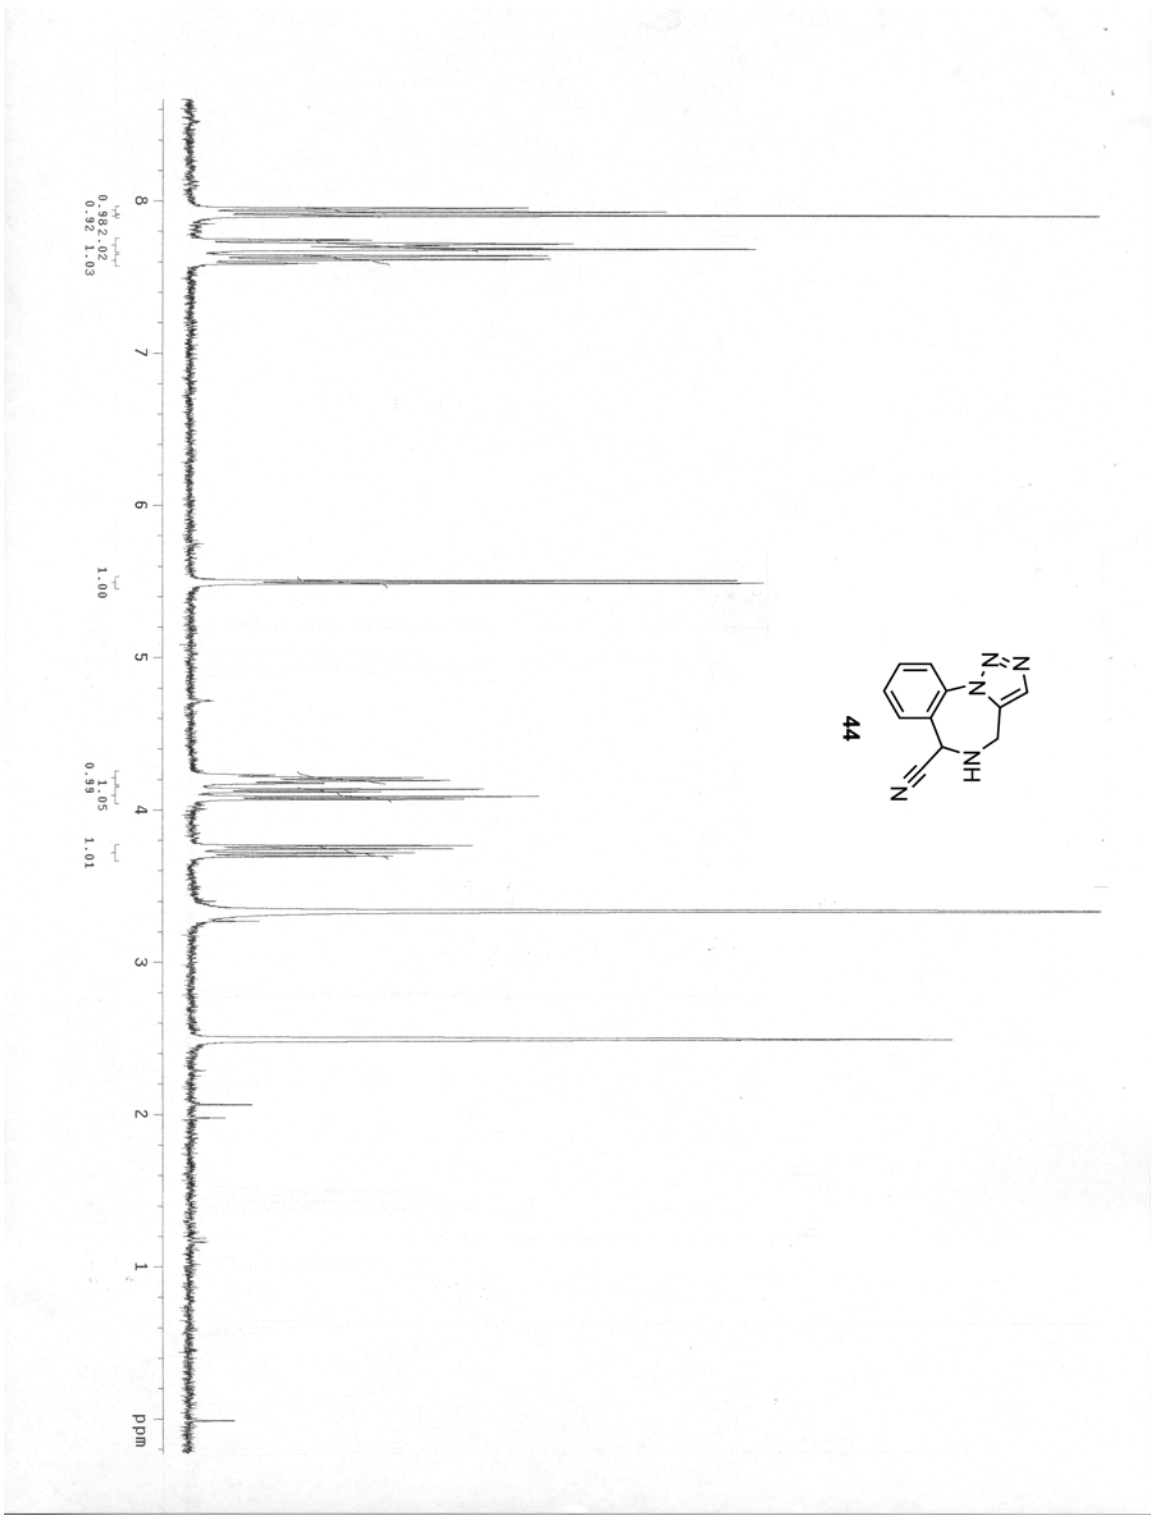



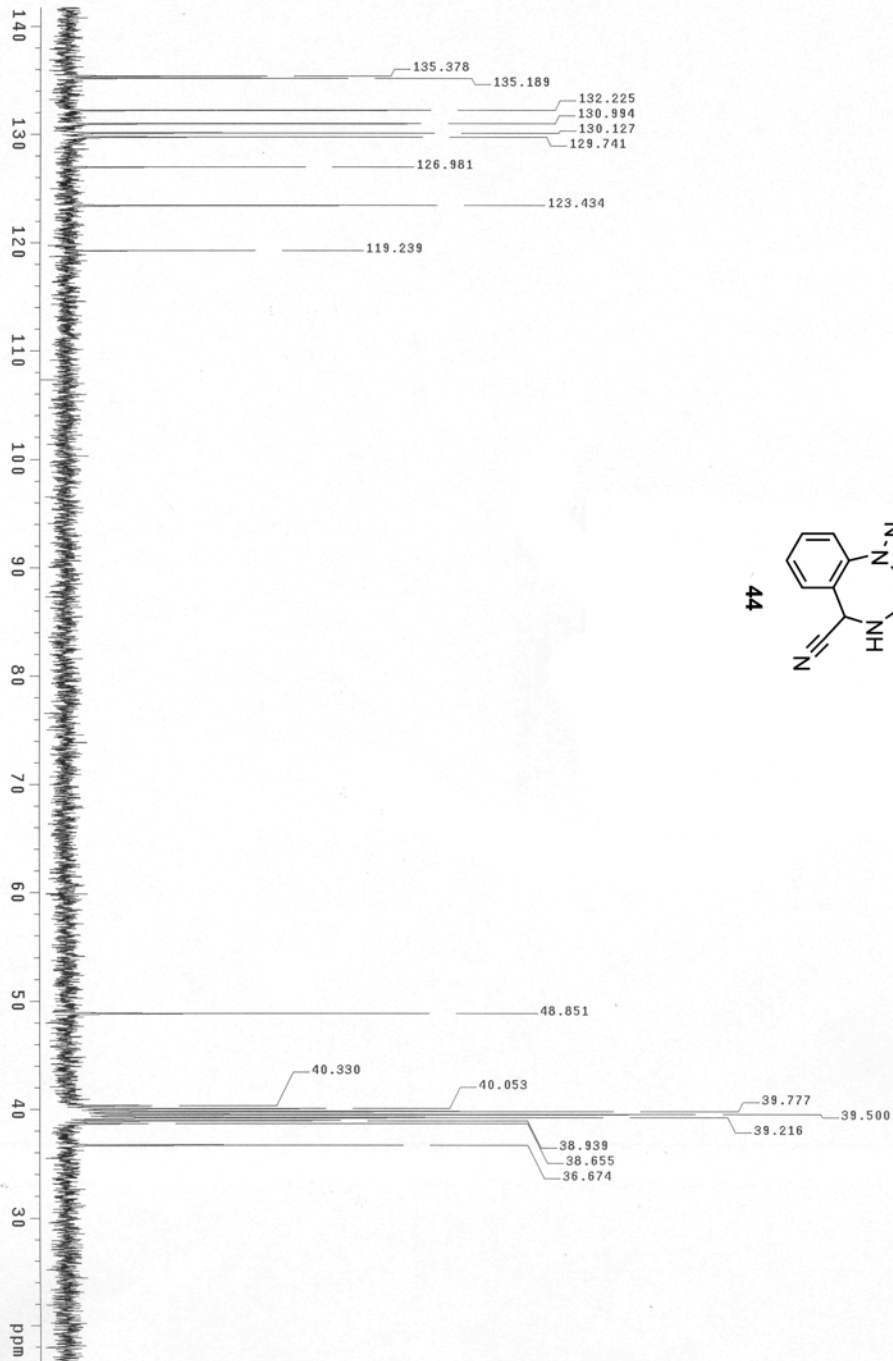

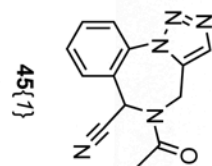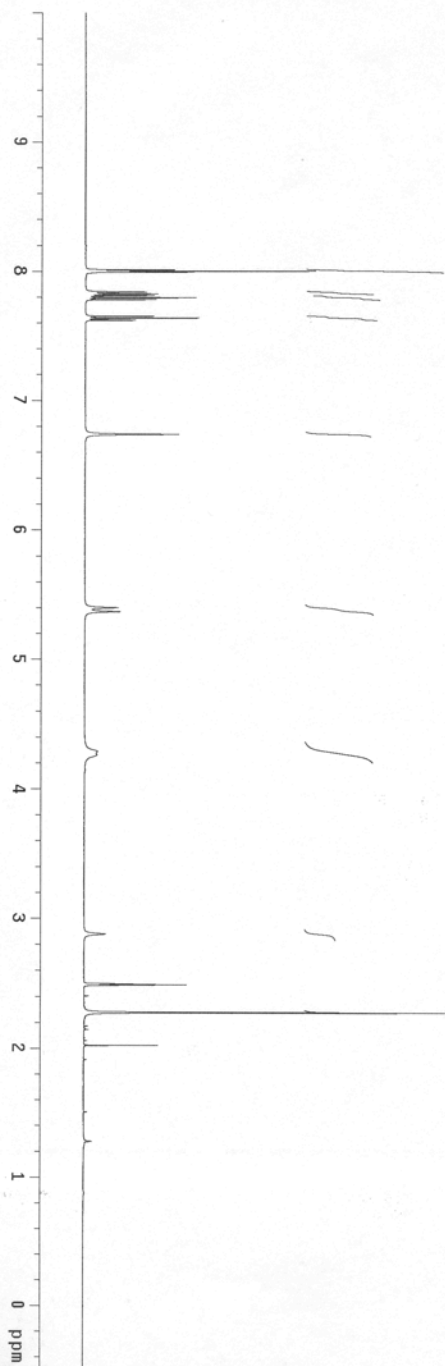

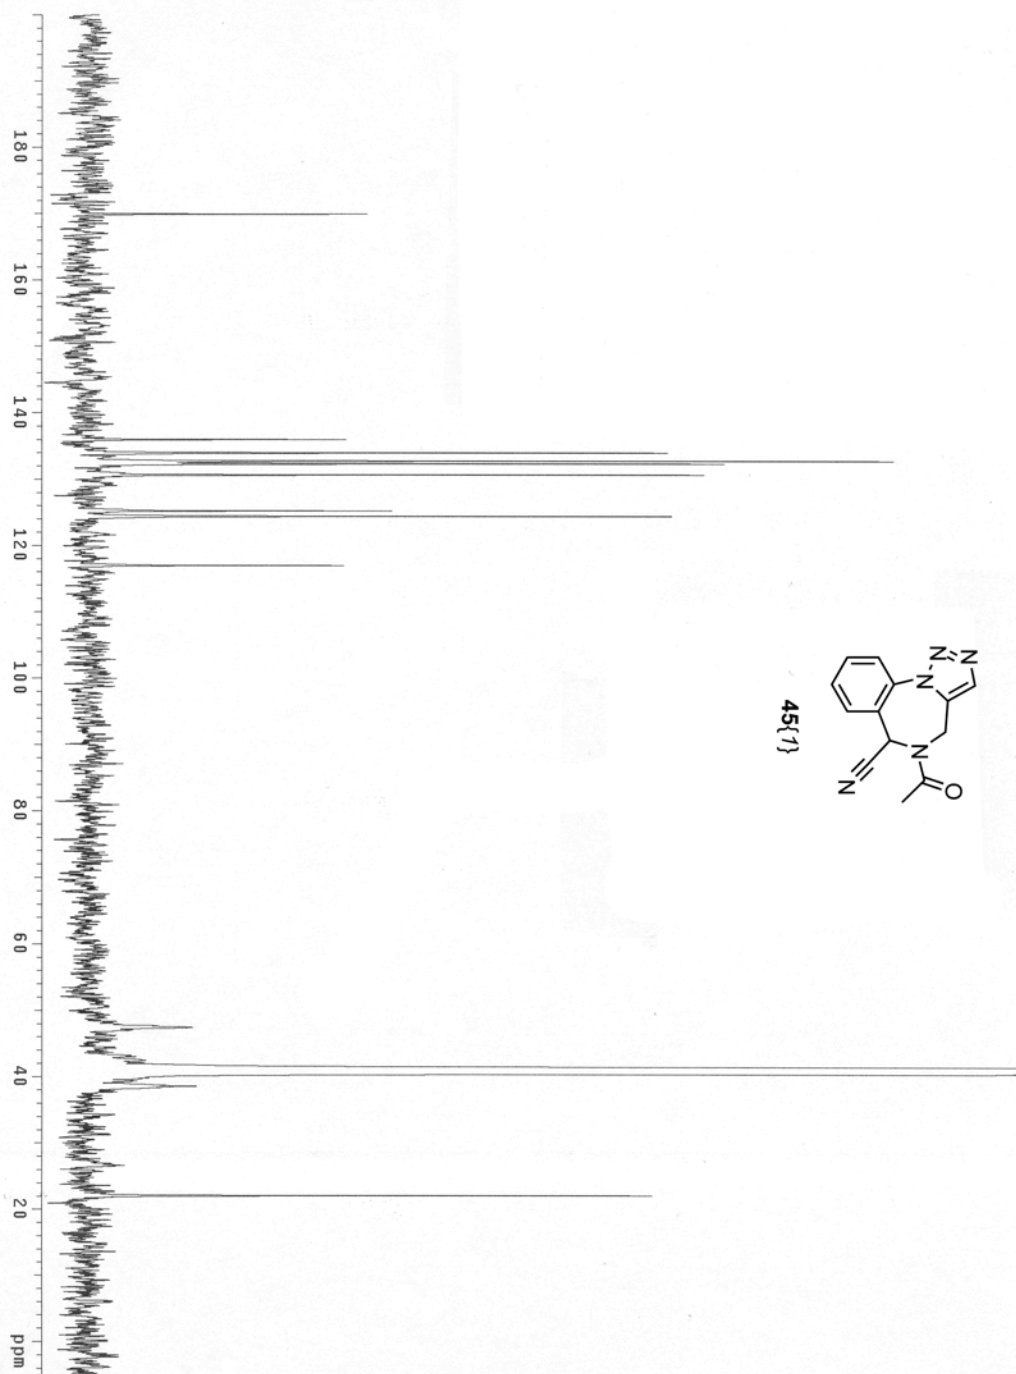

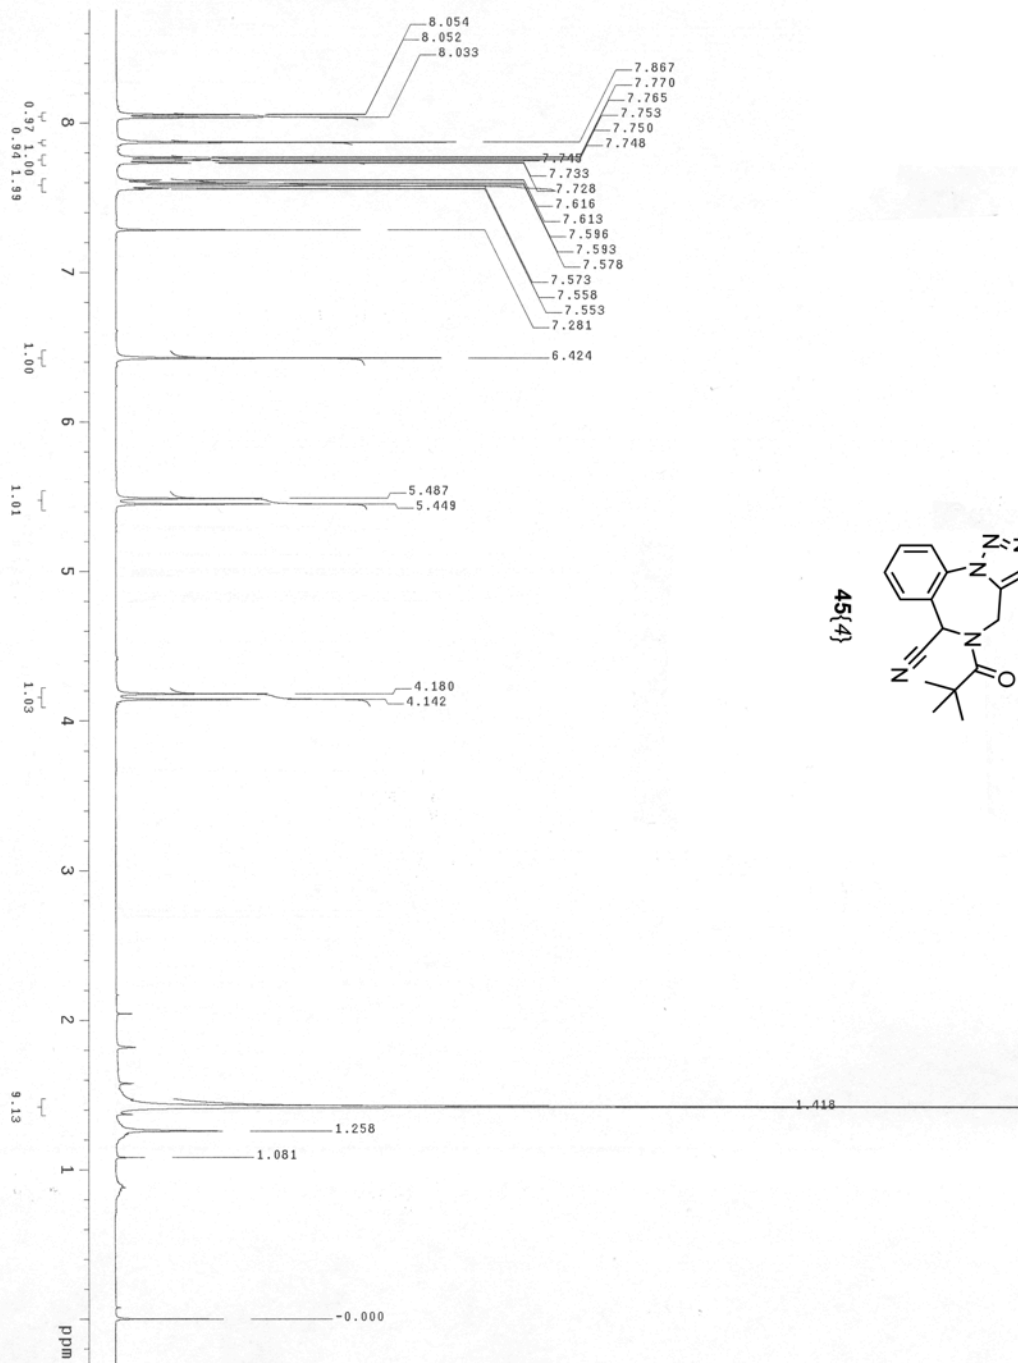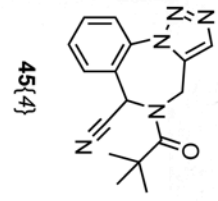

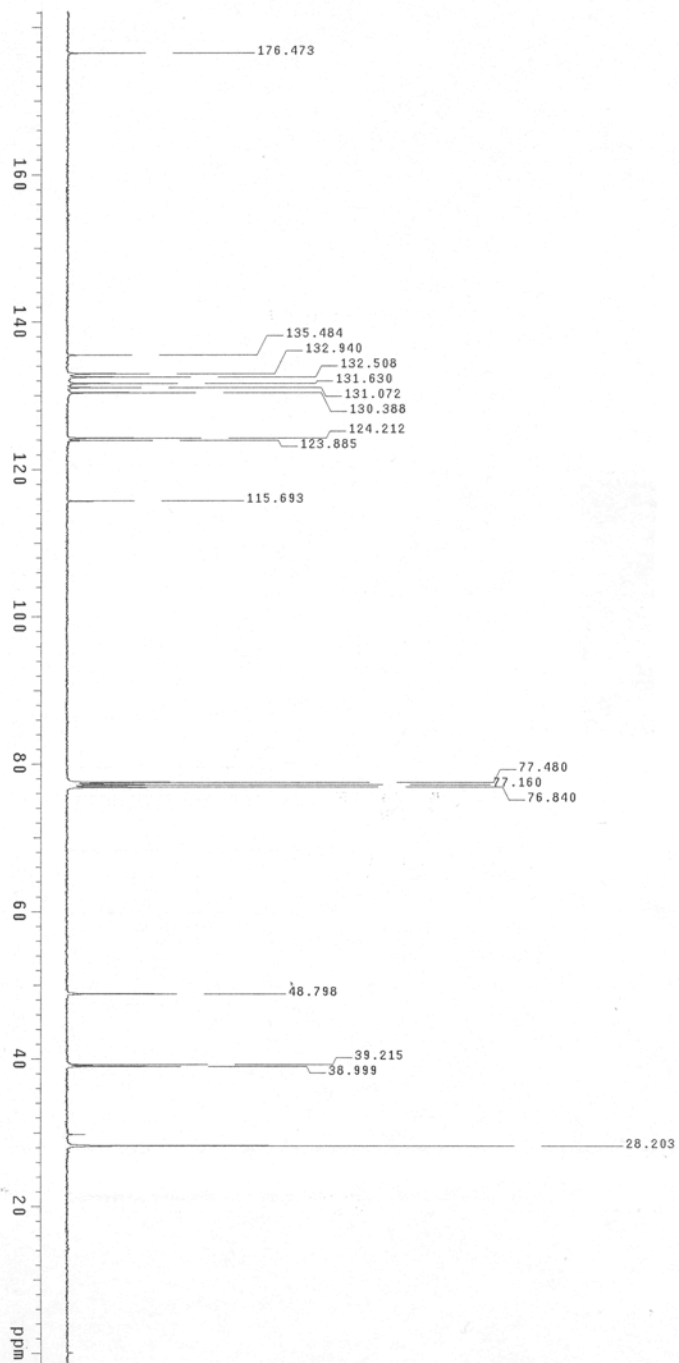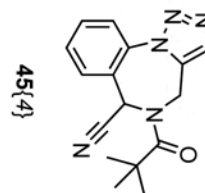

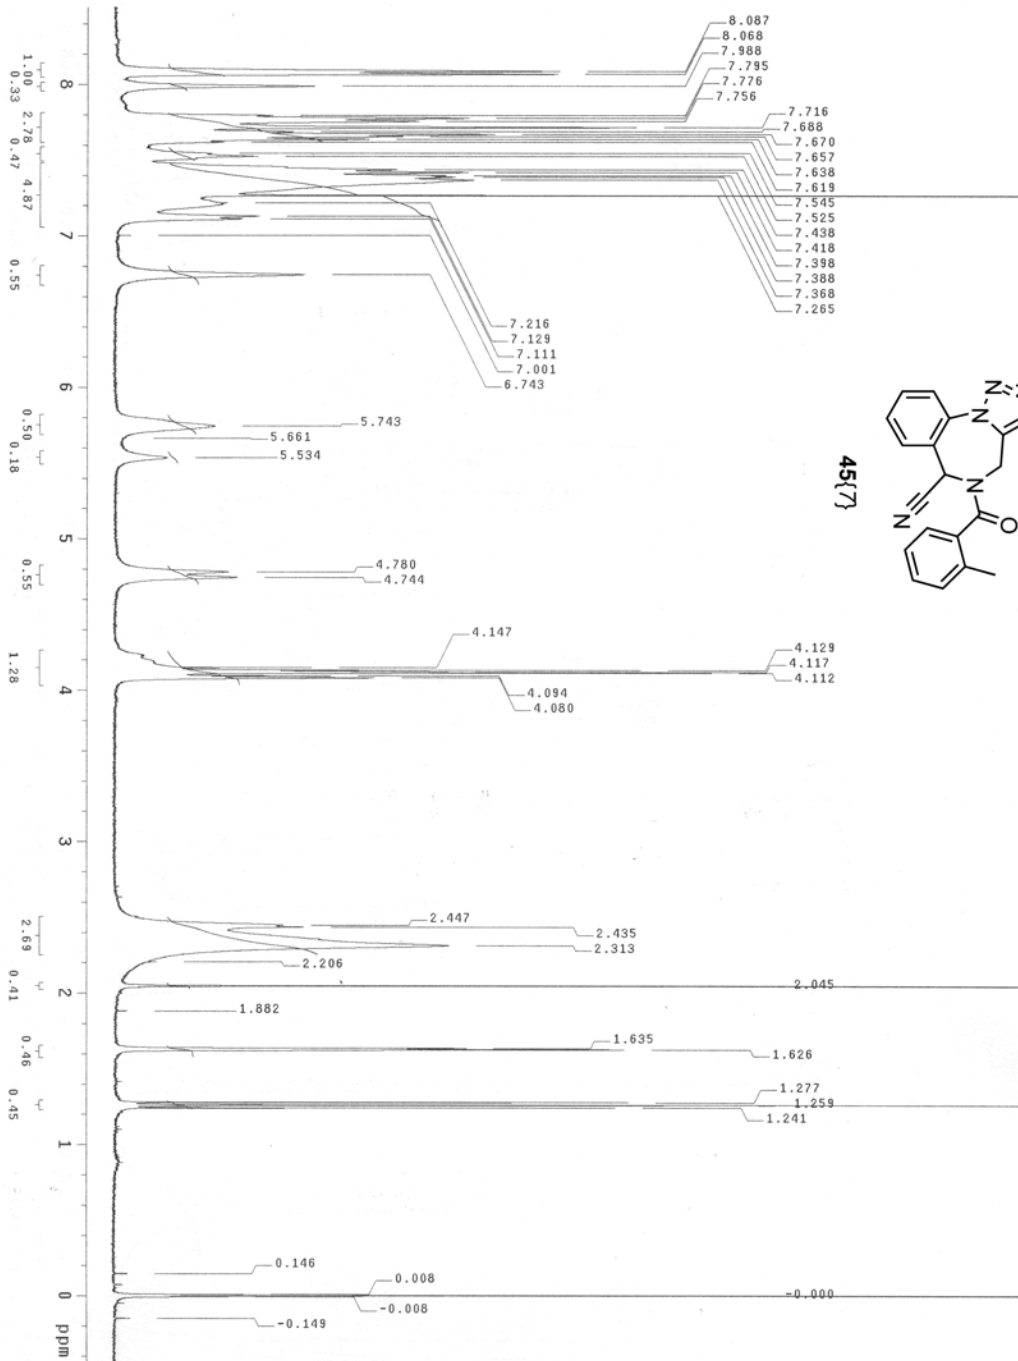

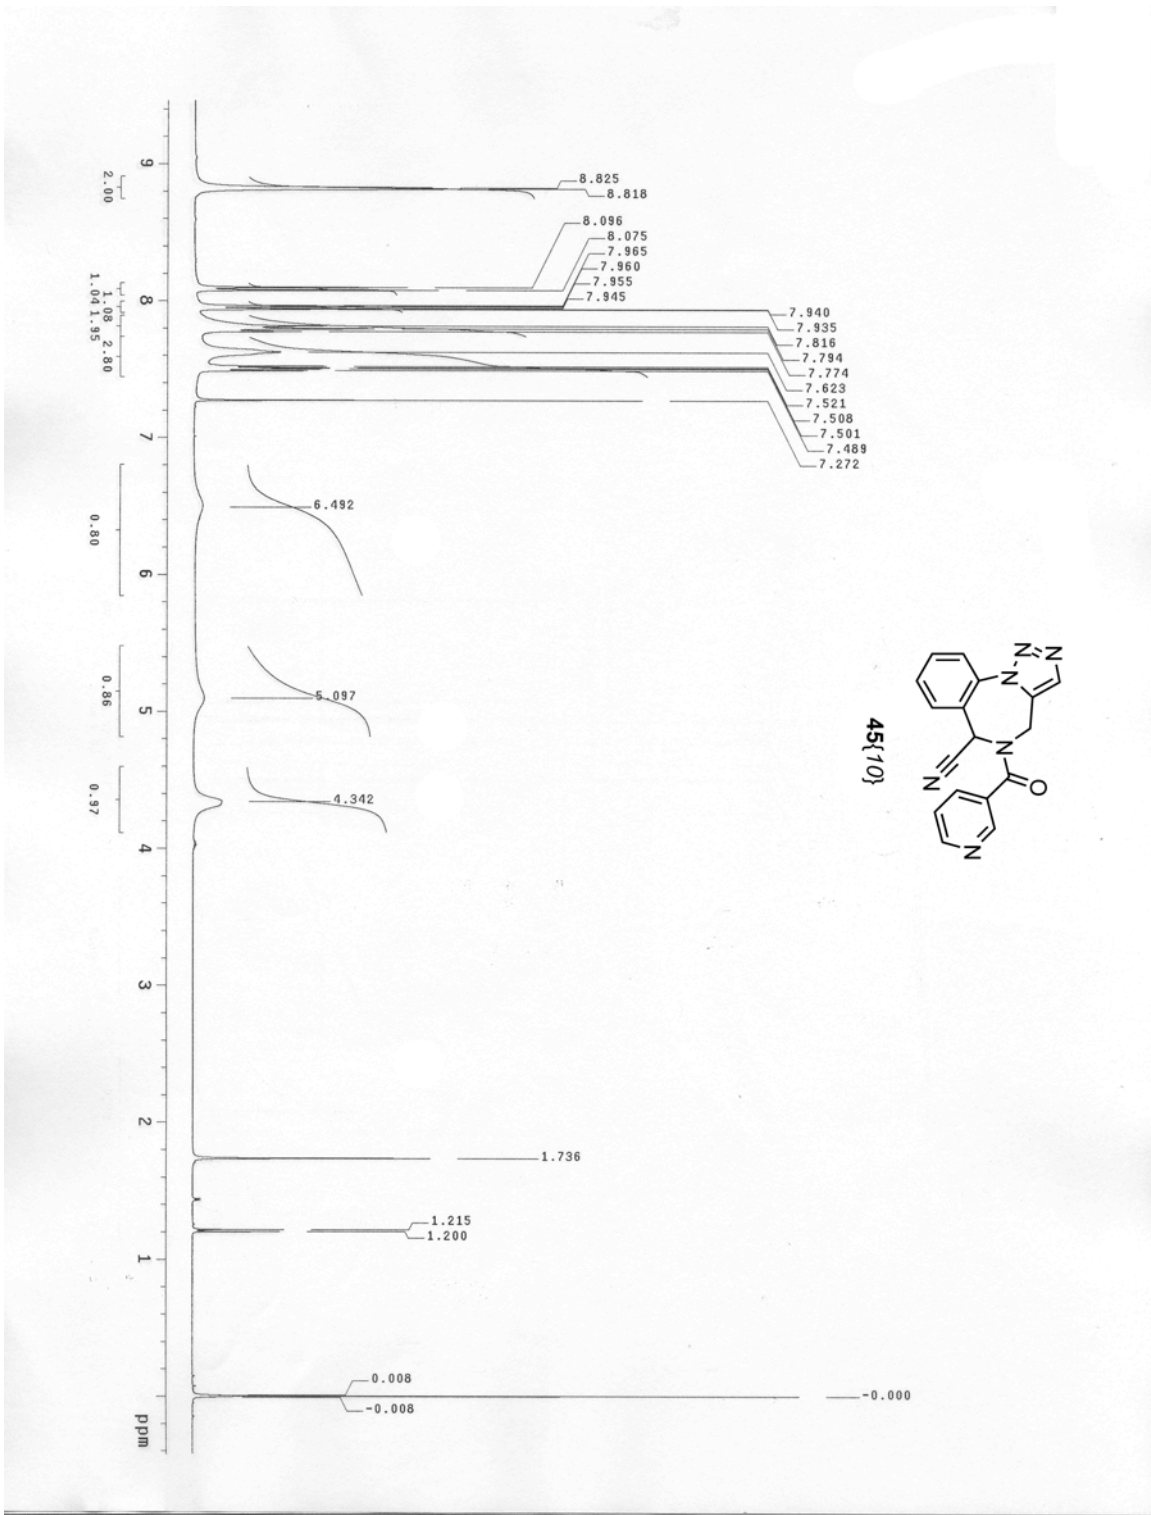

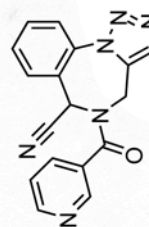

45(10)

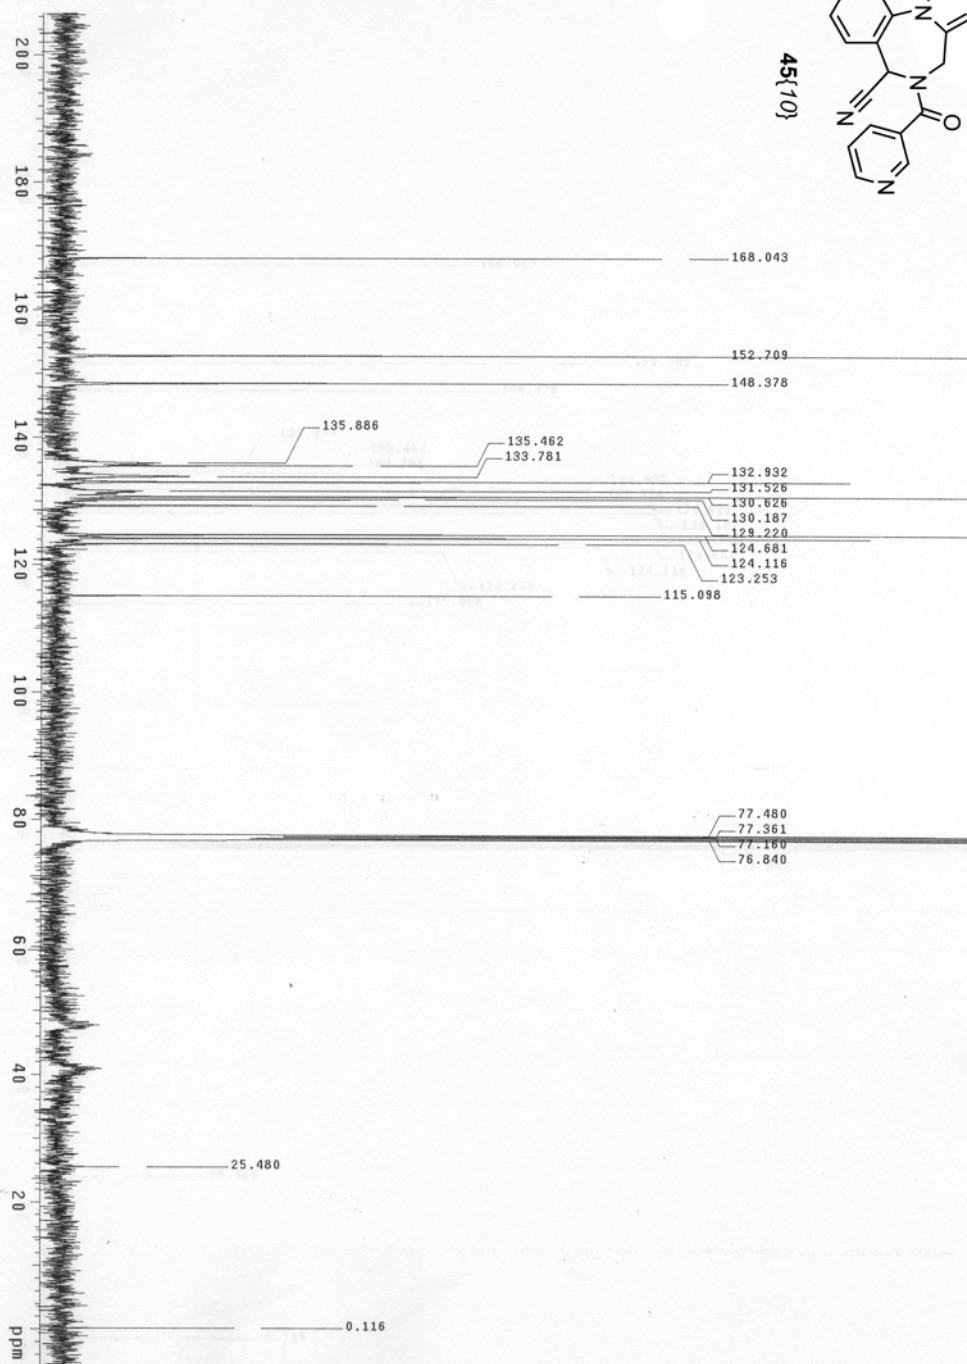



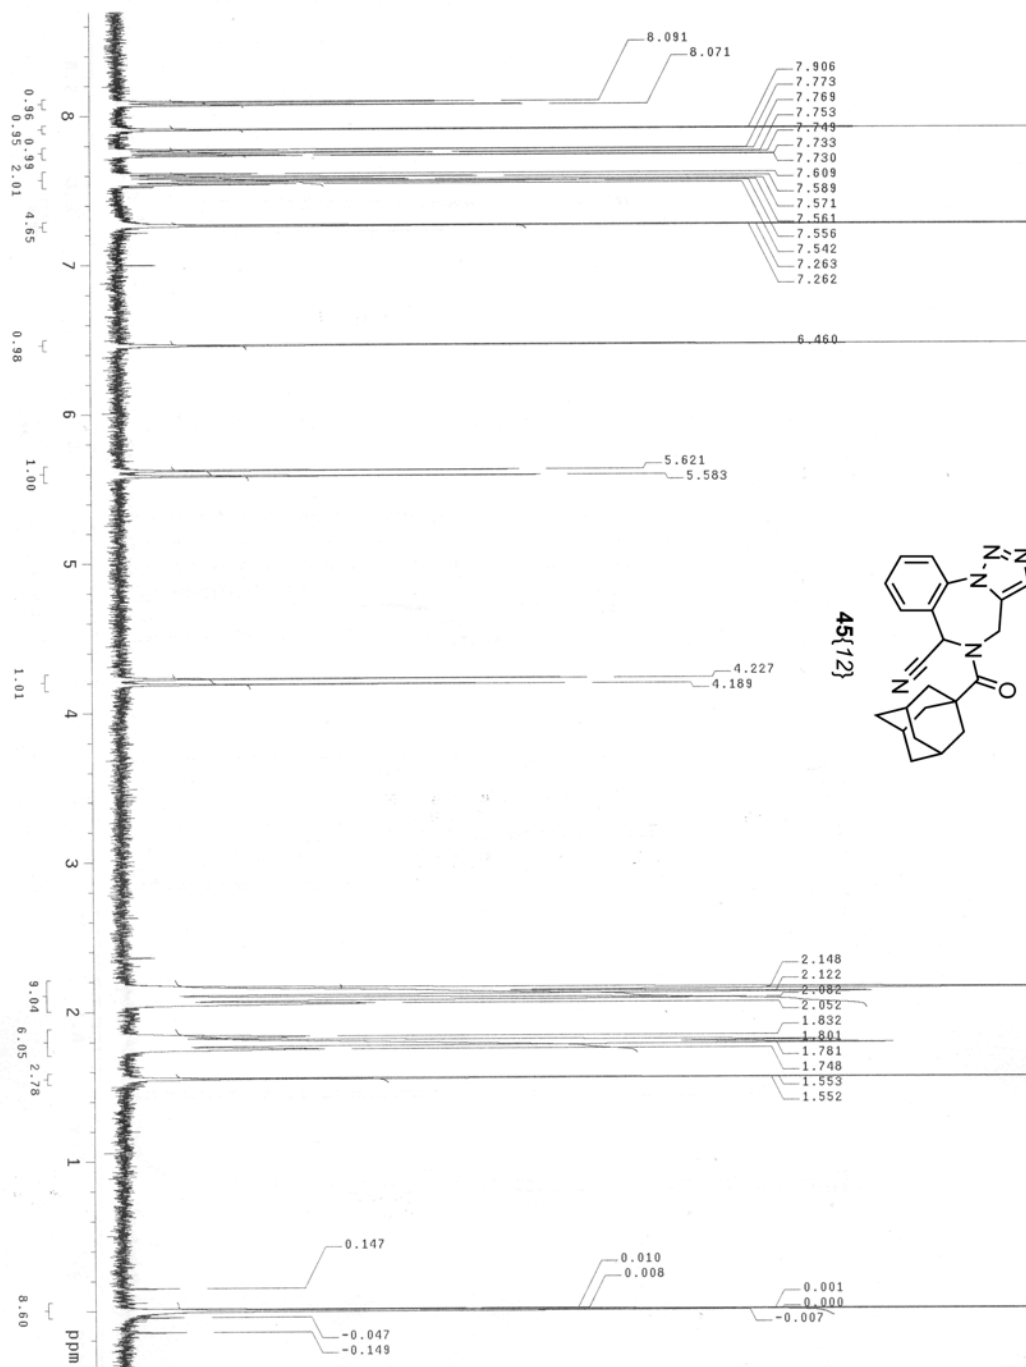

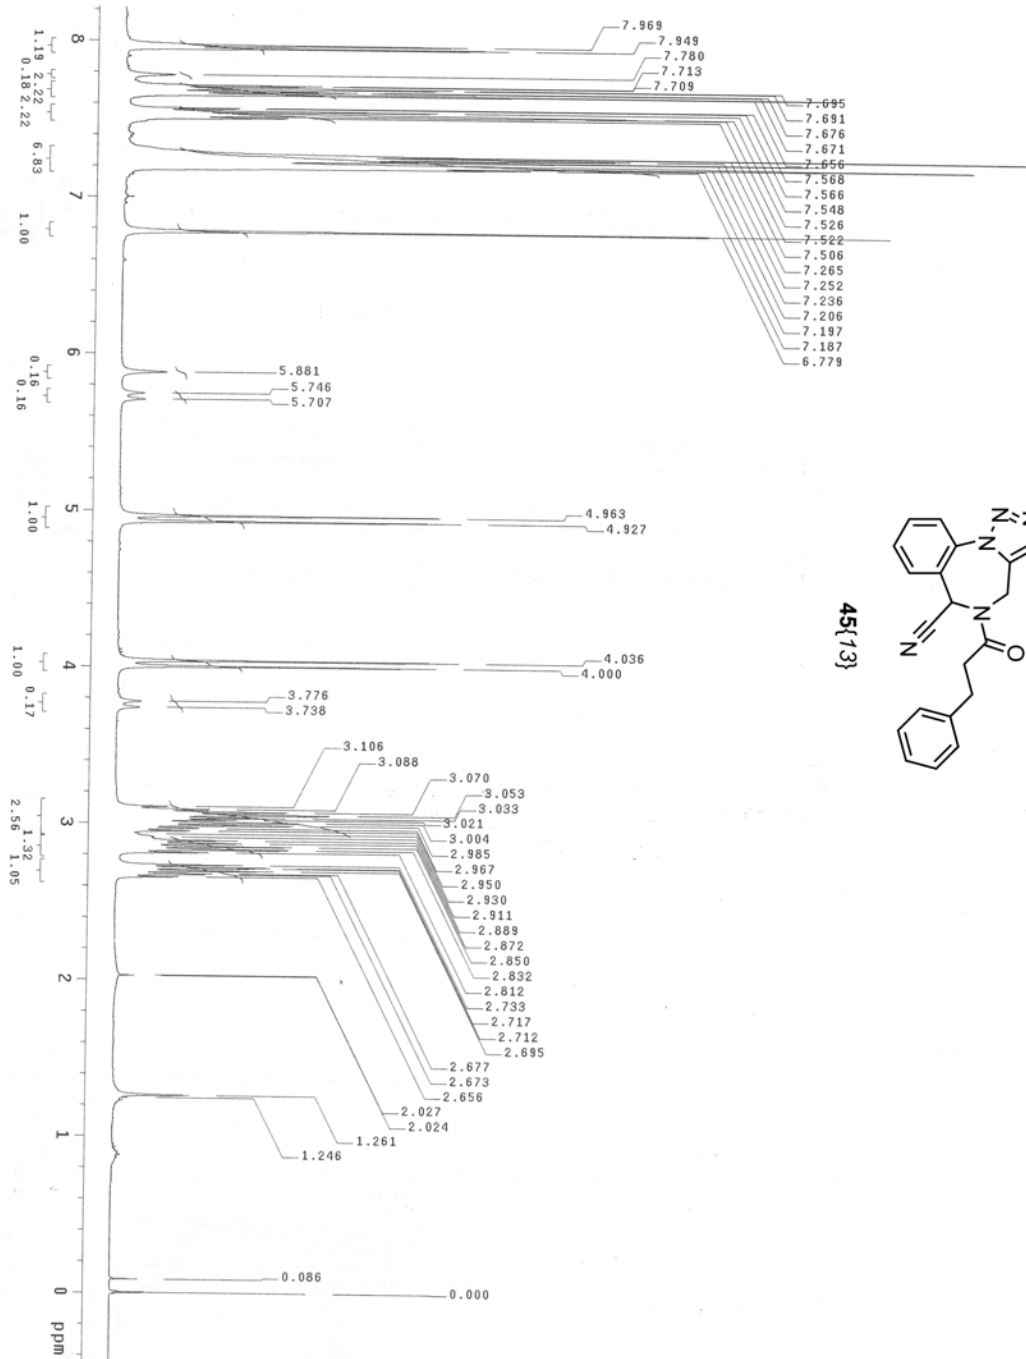

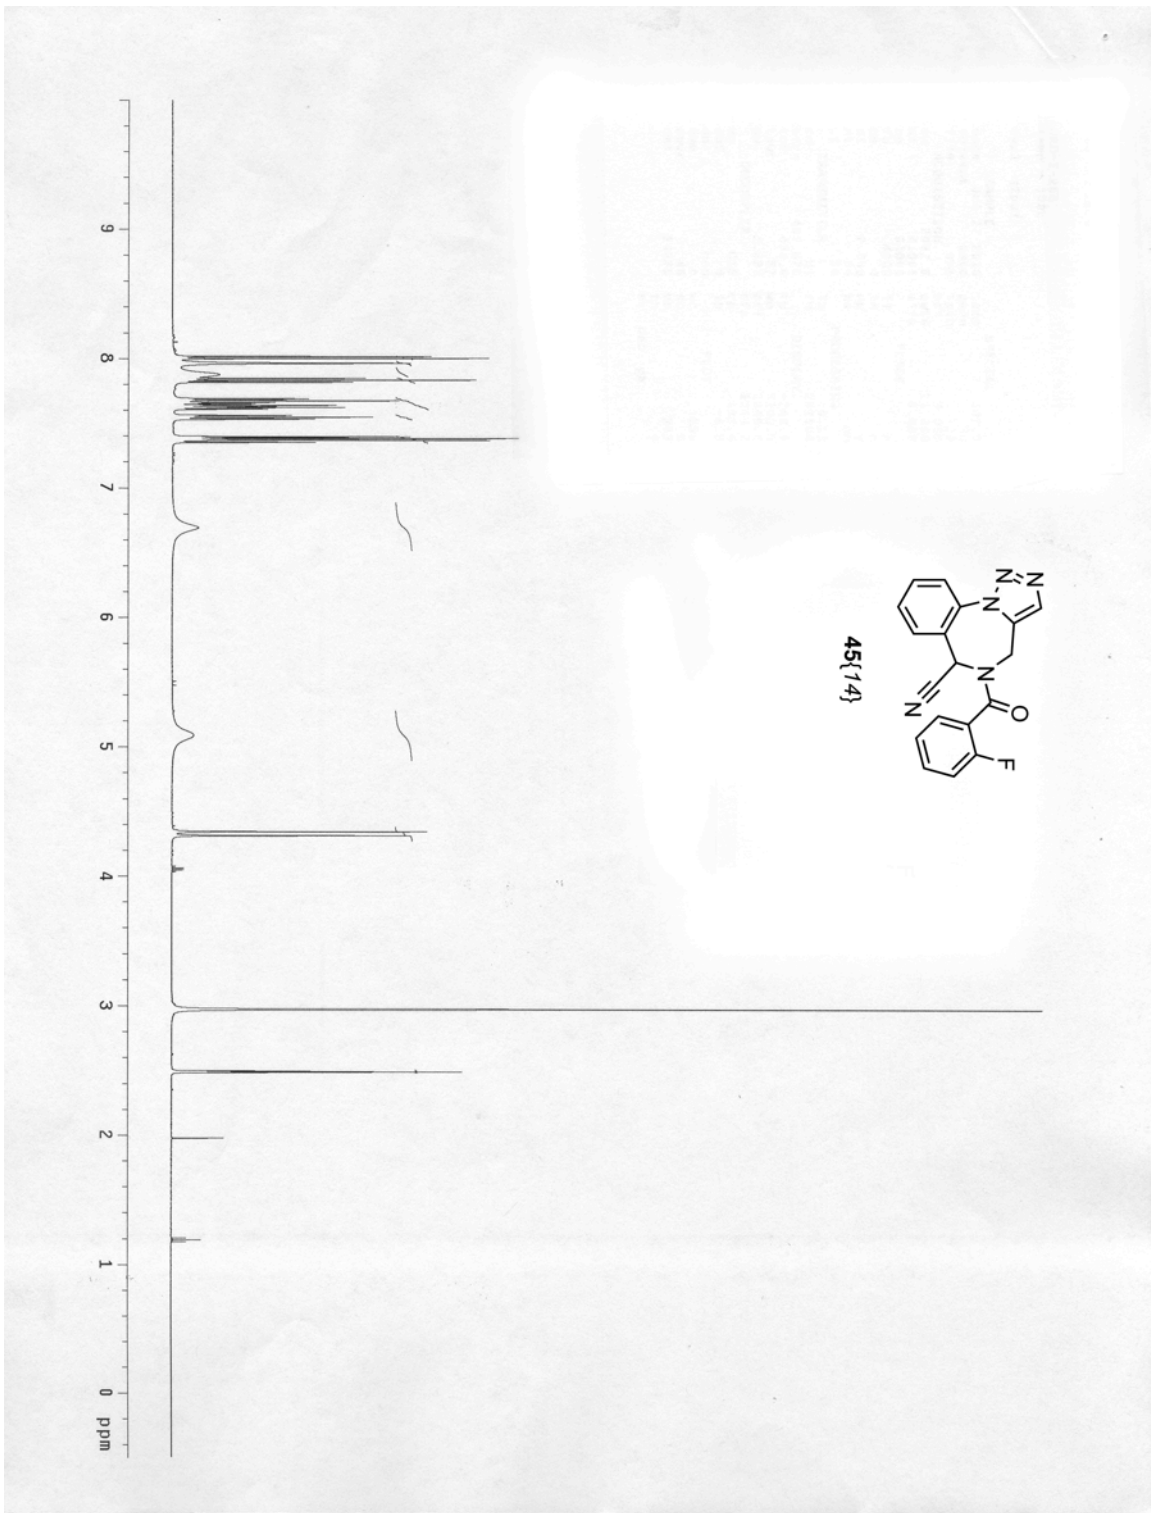

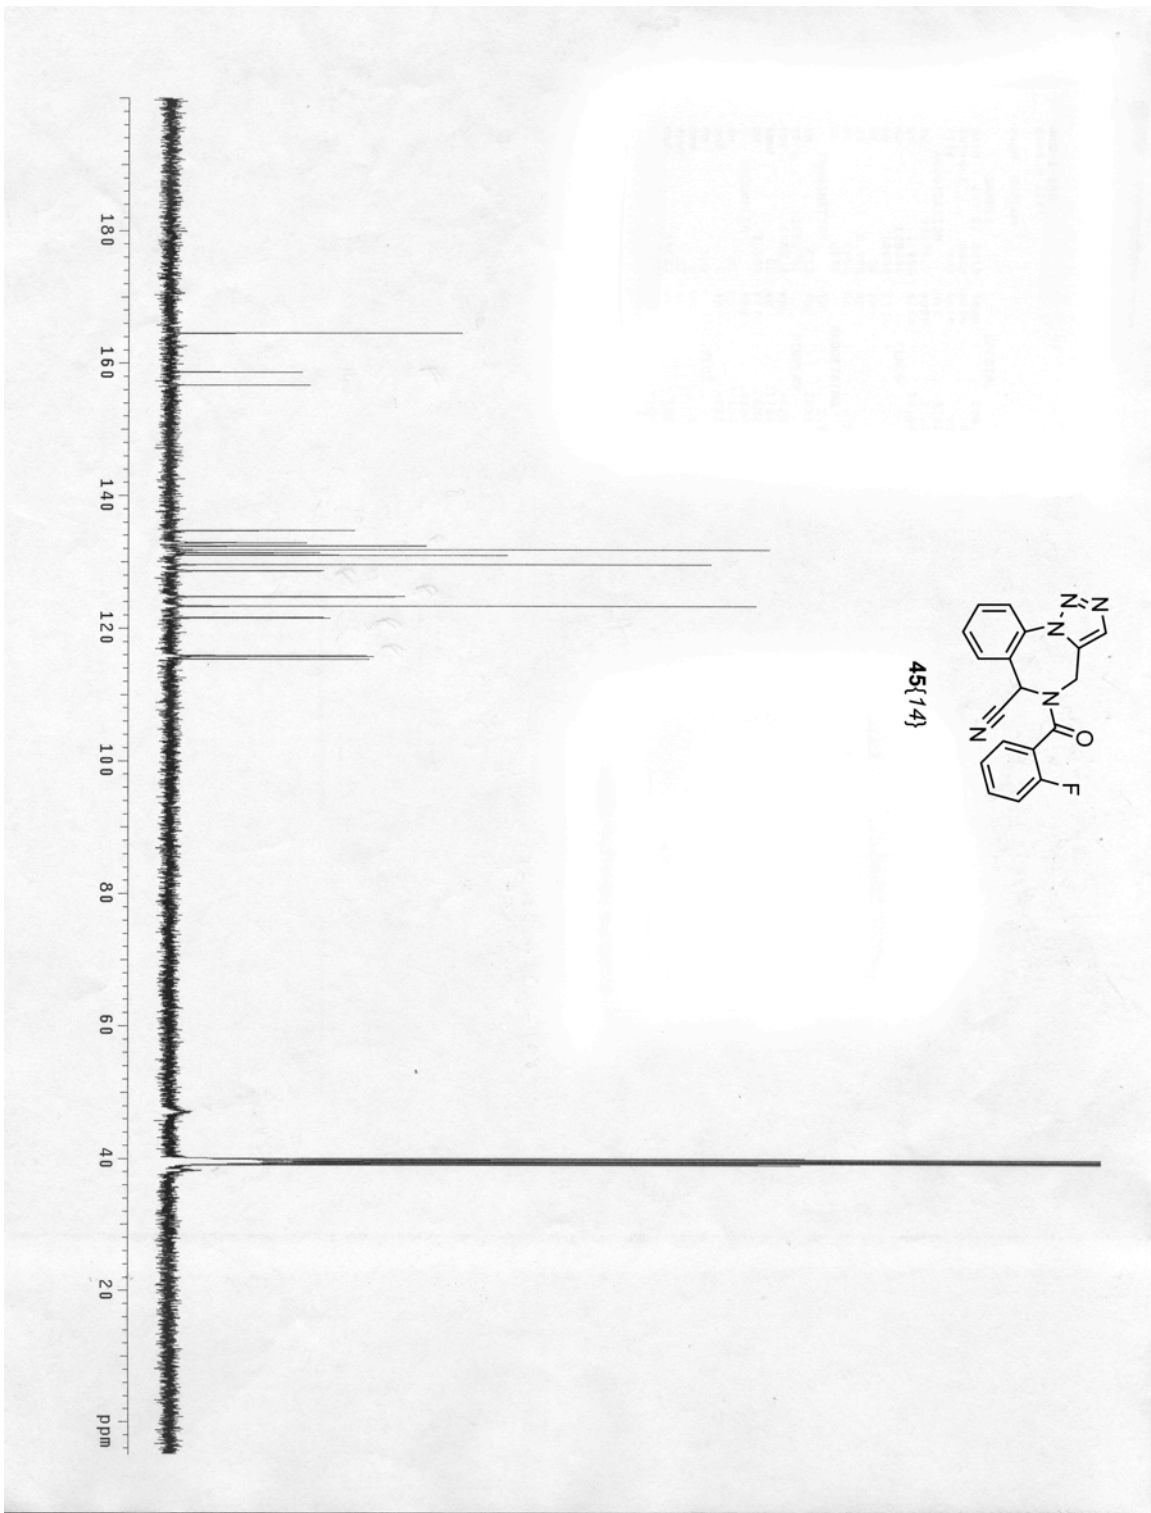

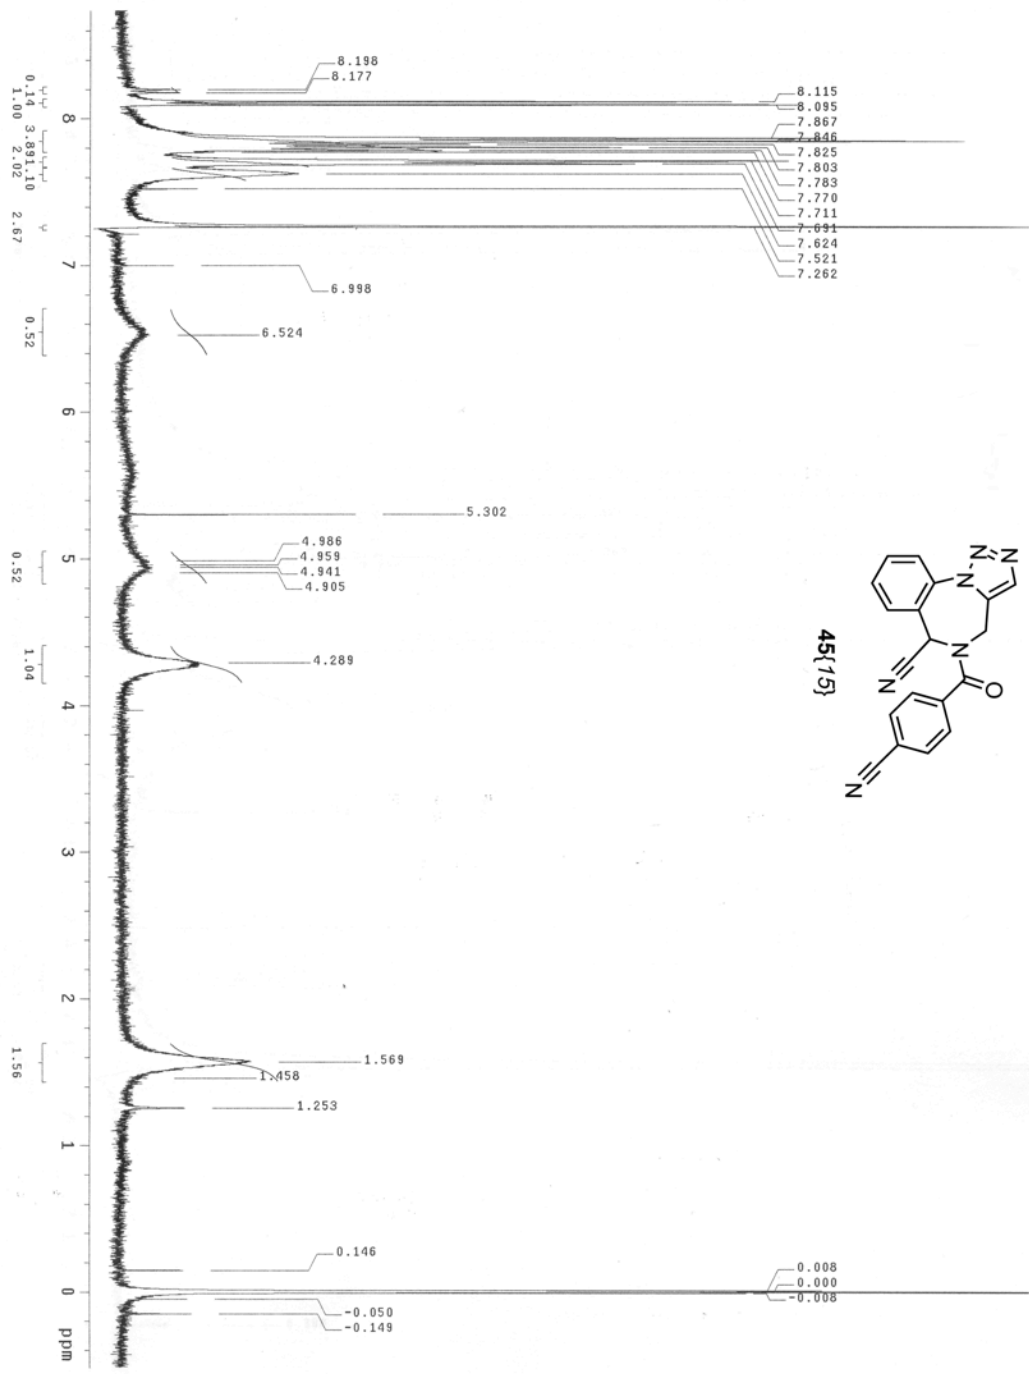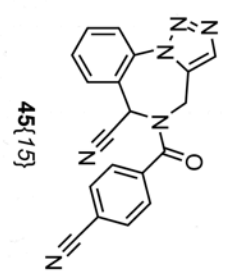



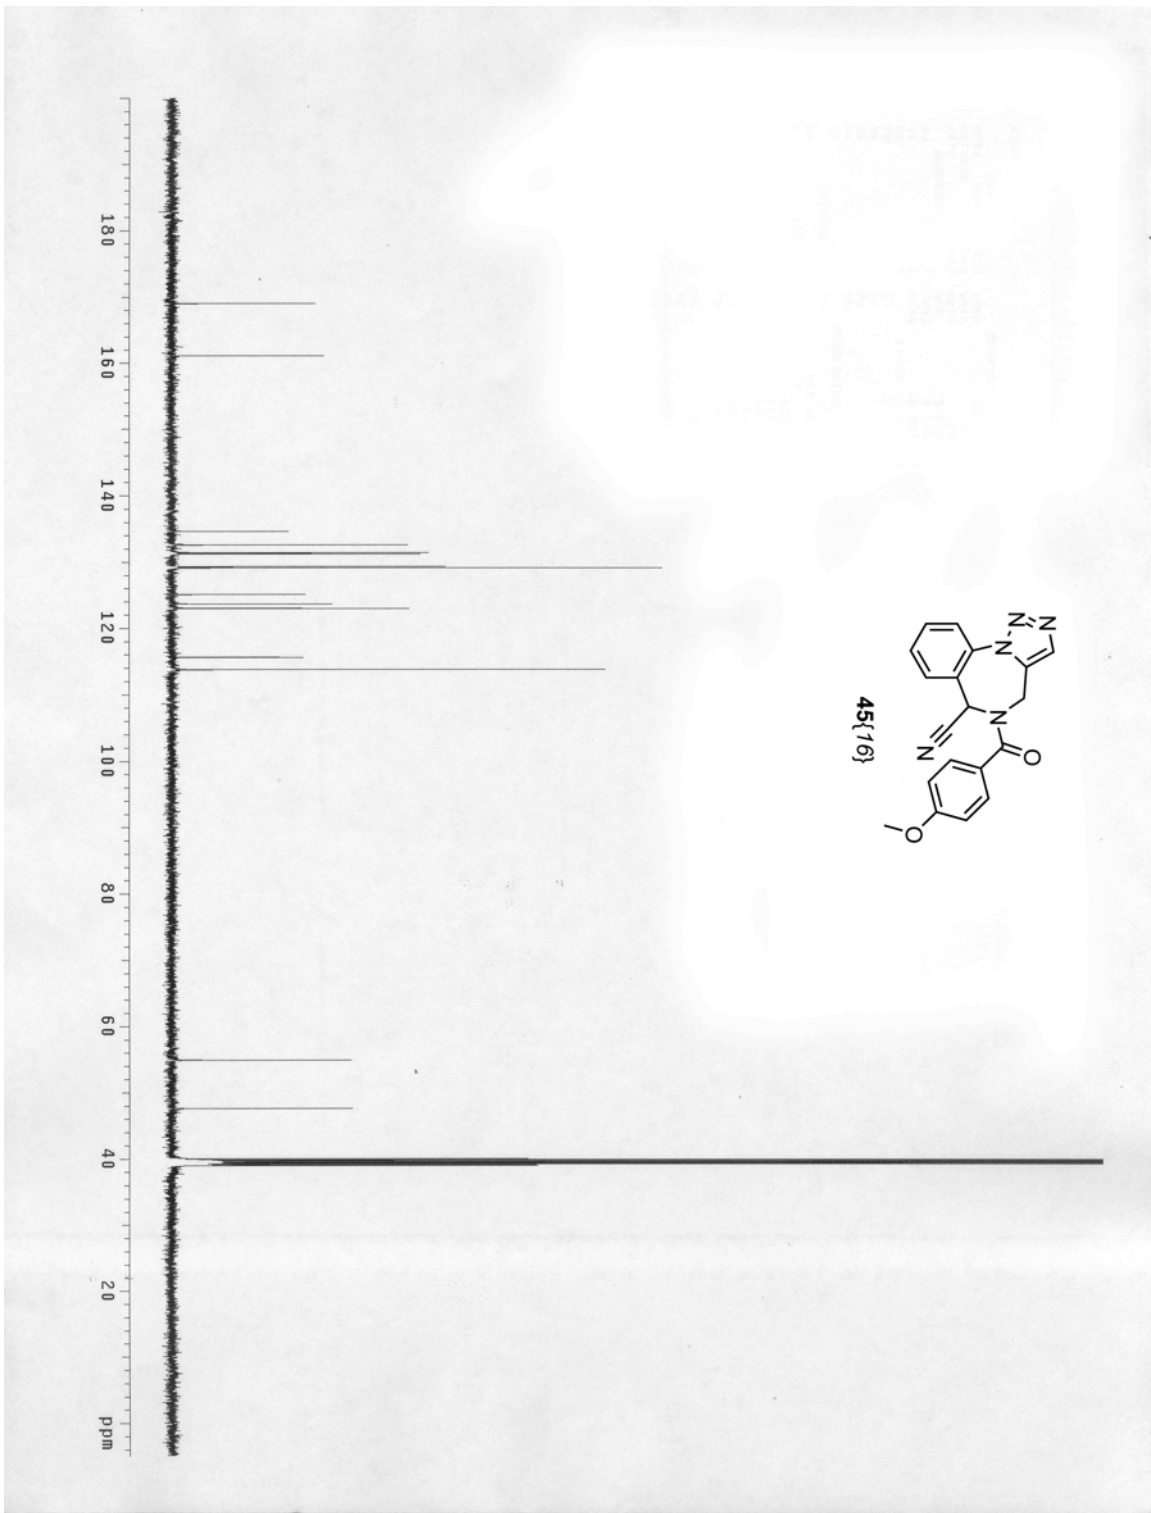

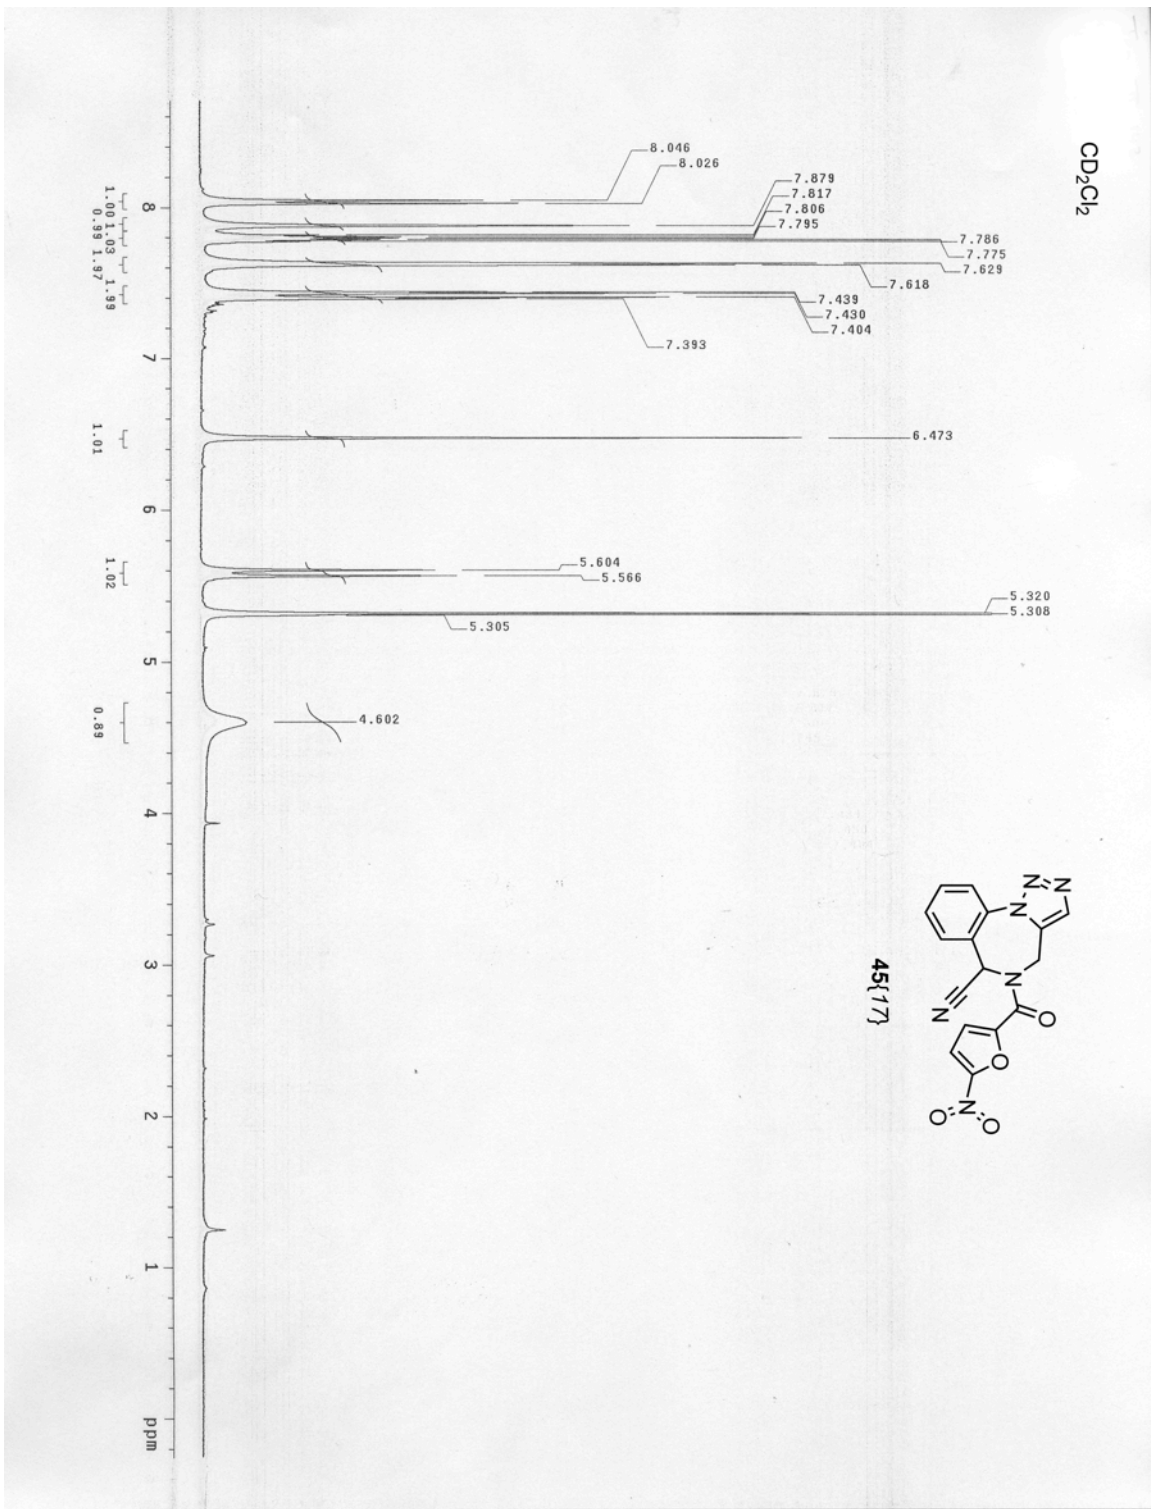



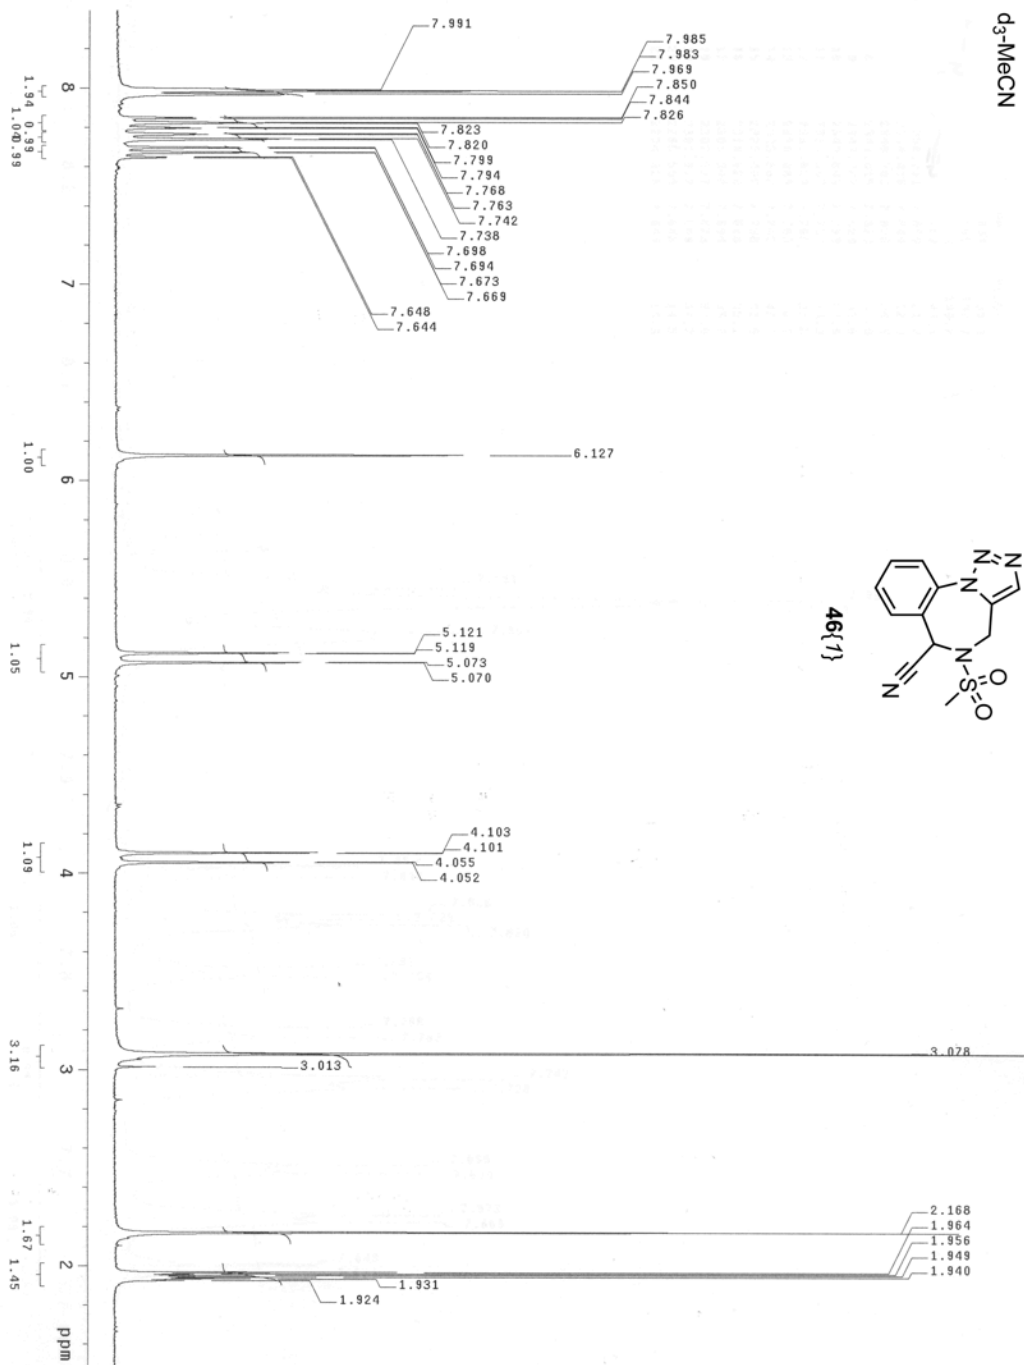

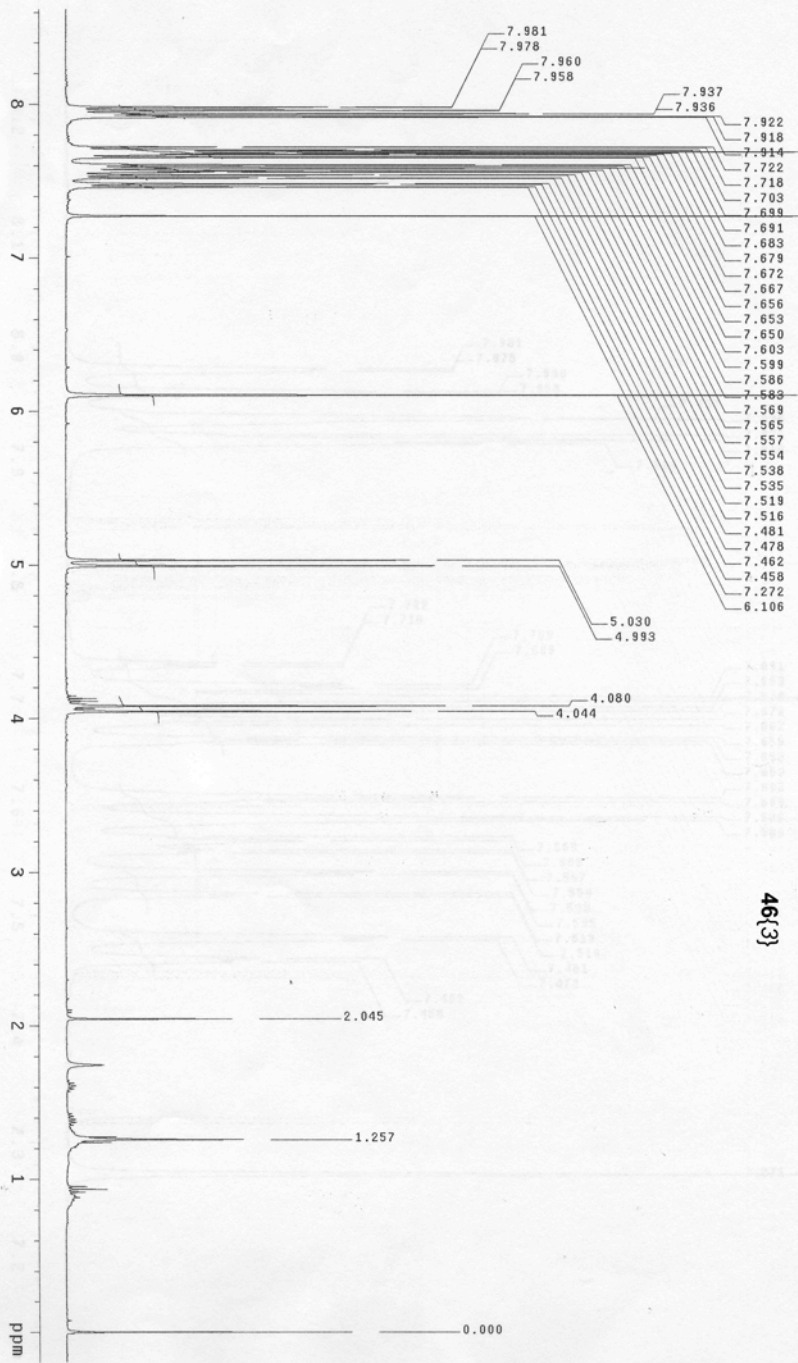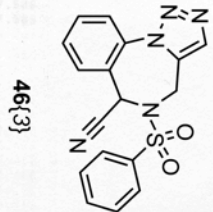

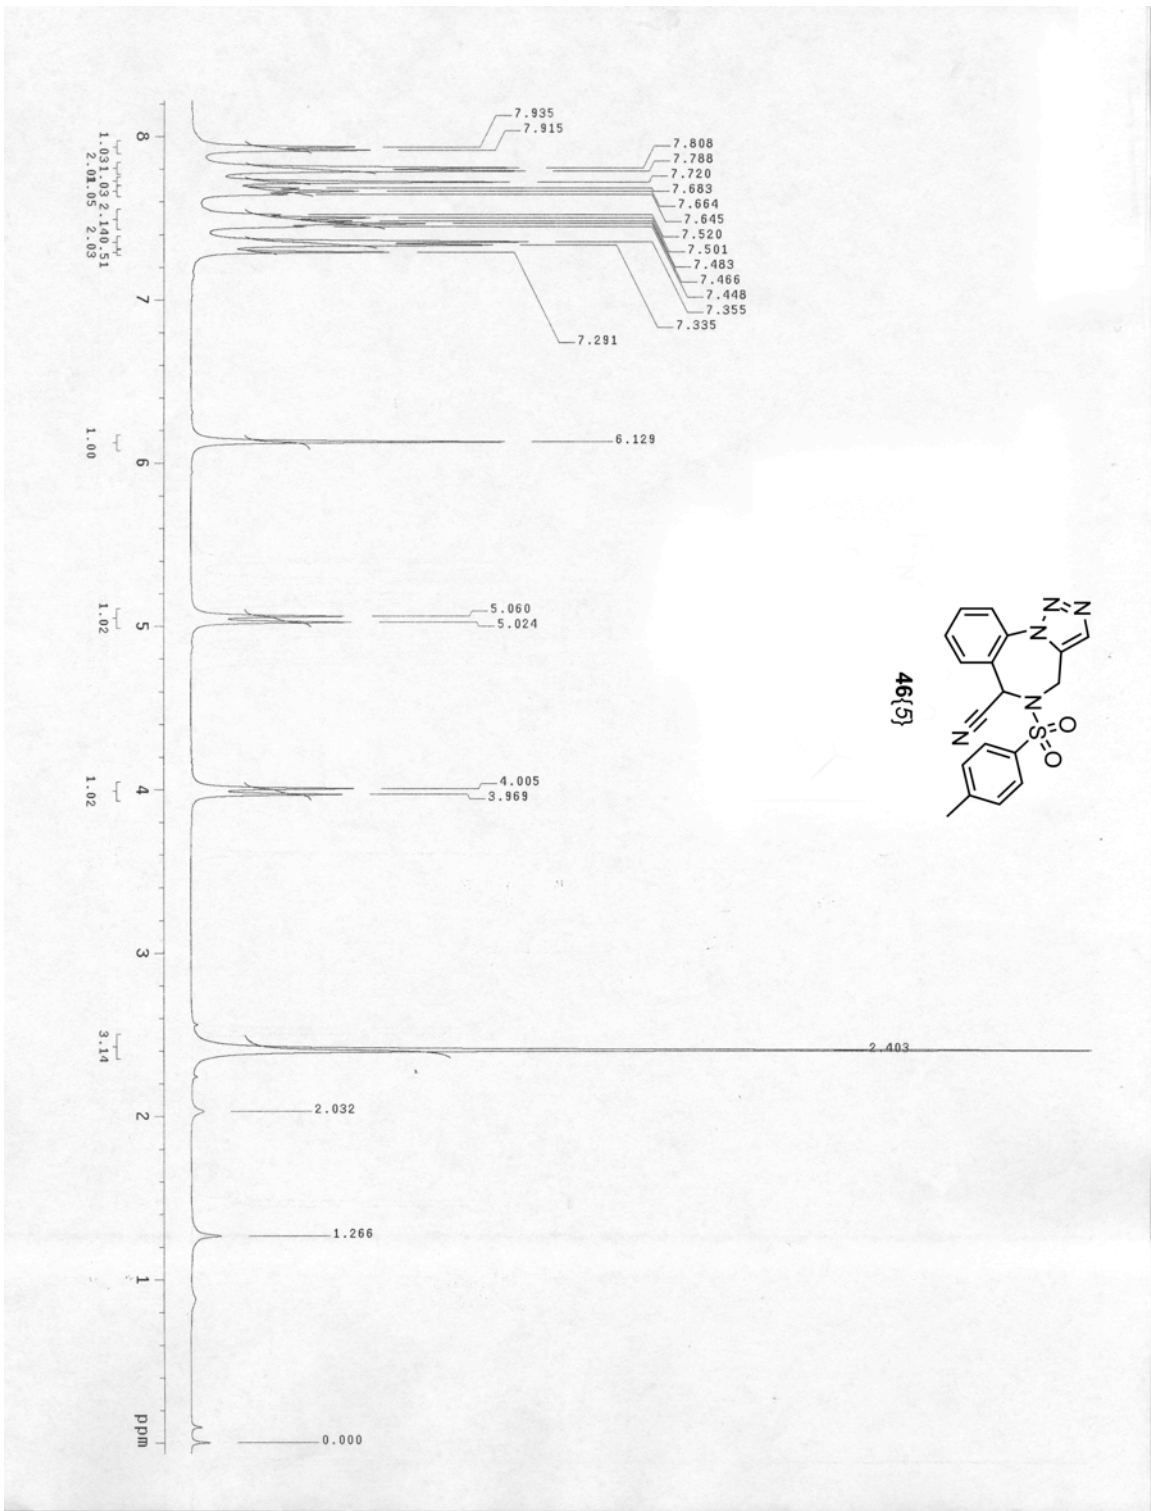

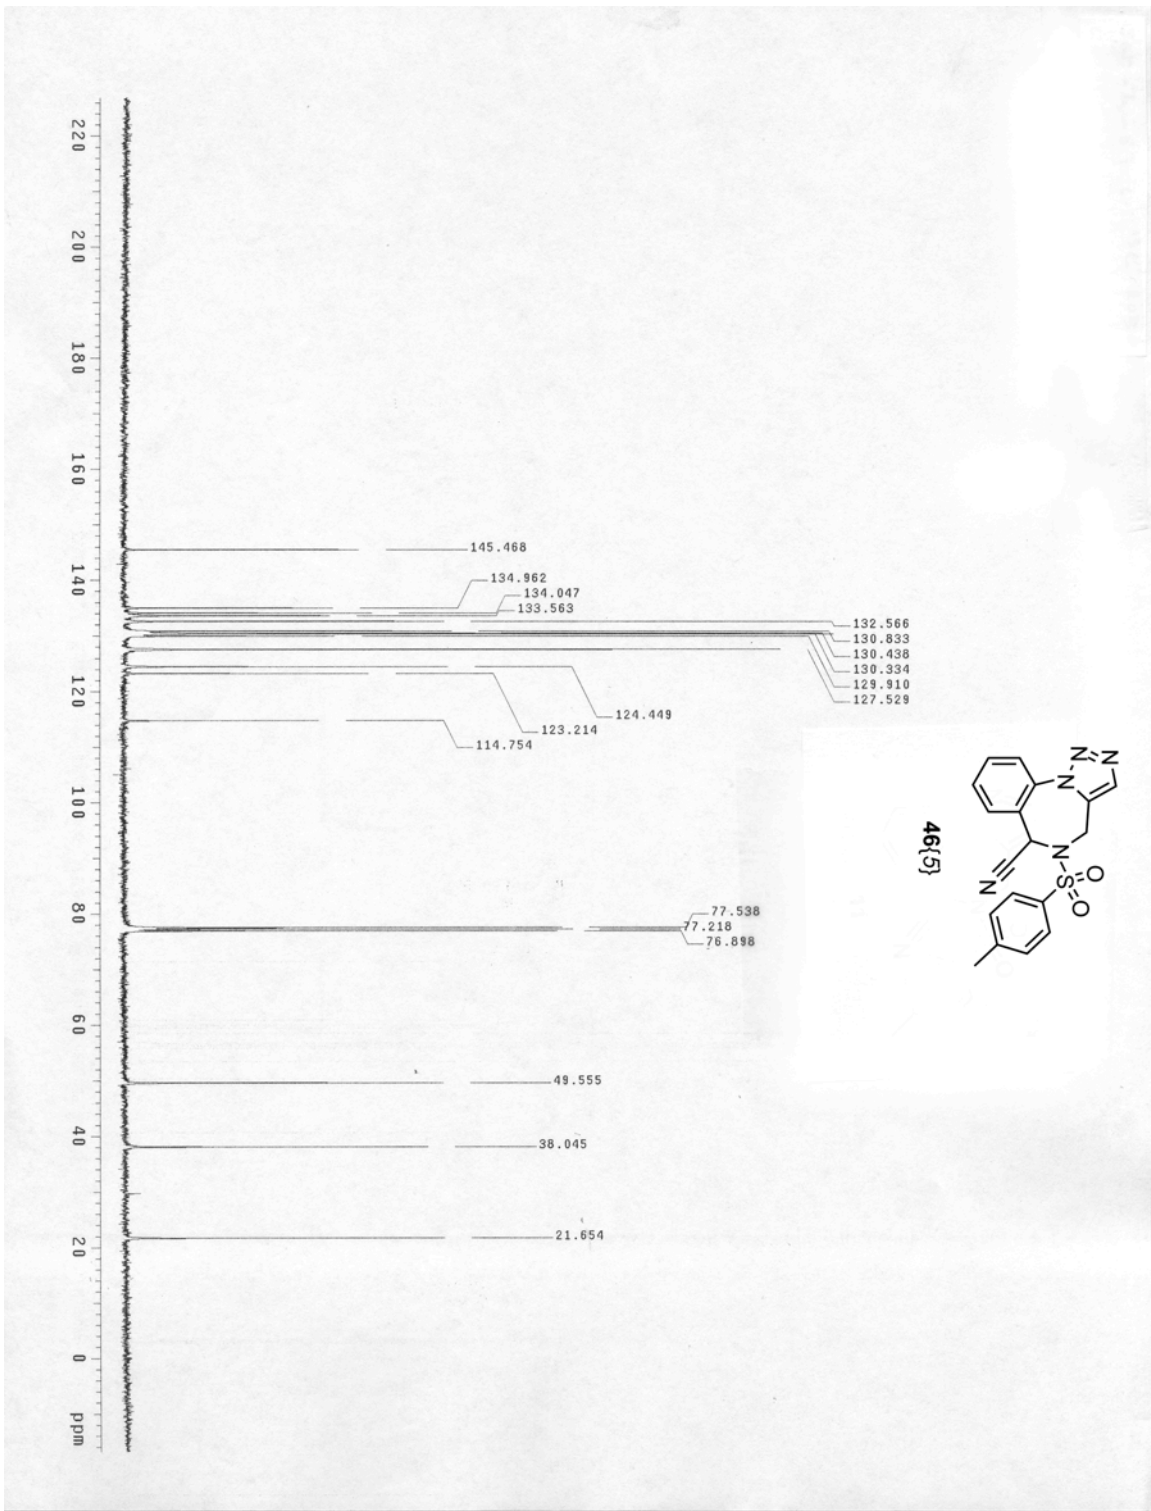

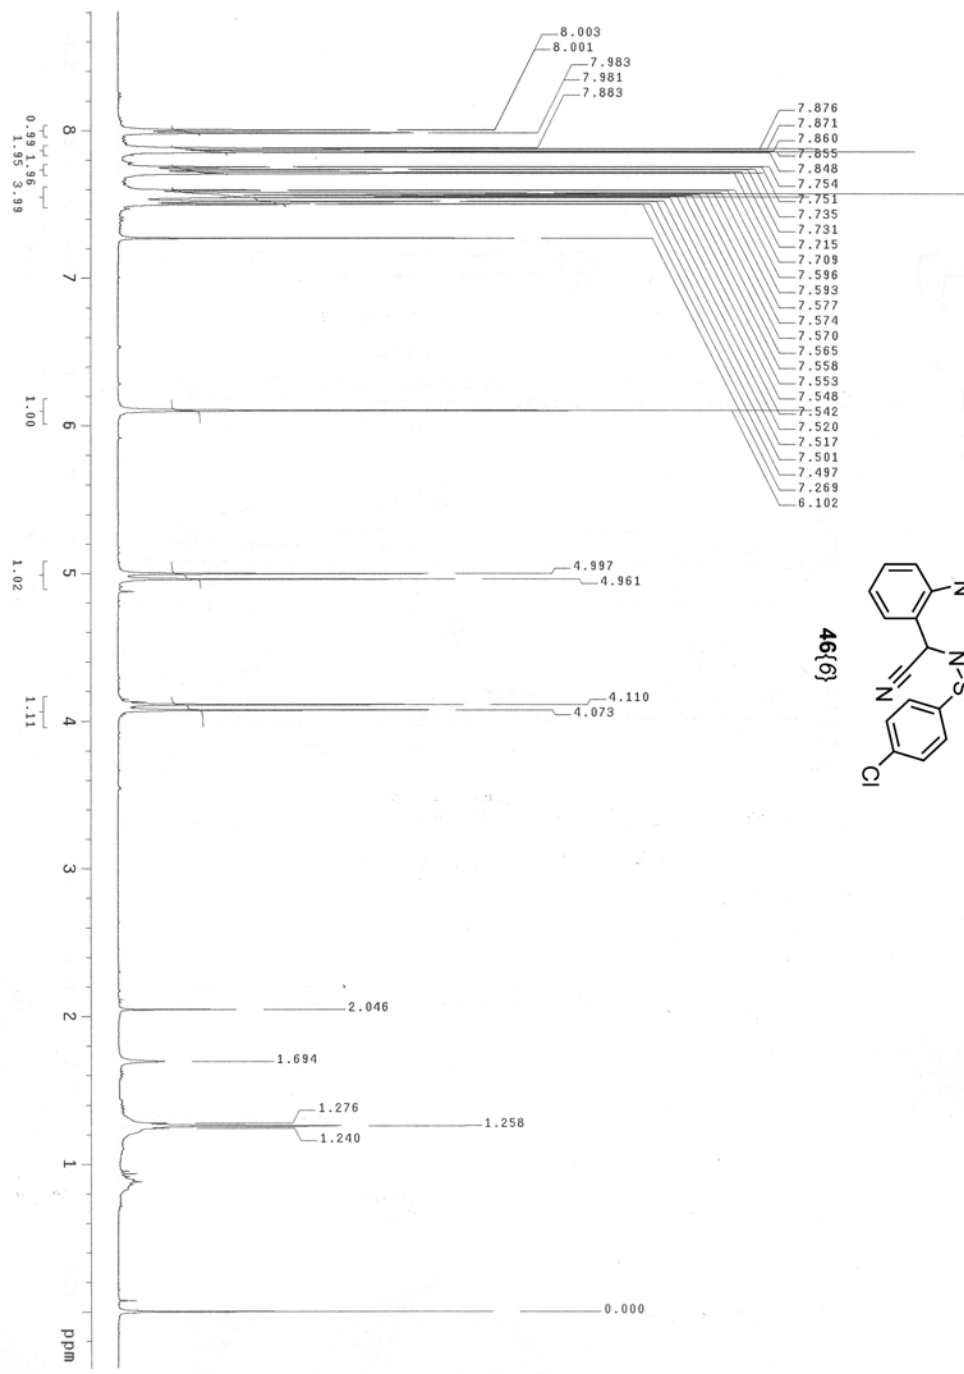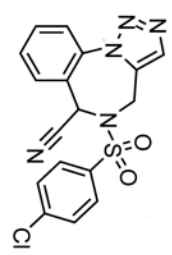

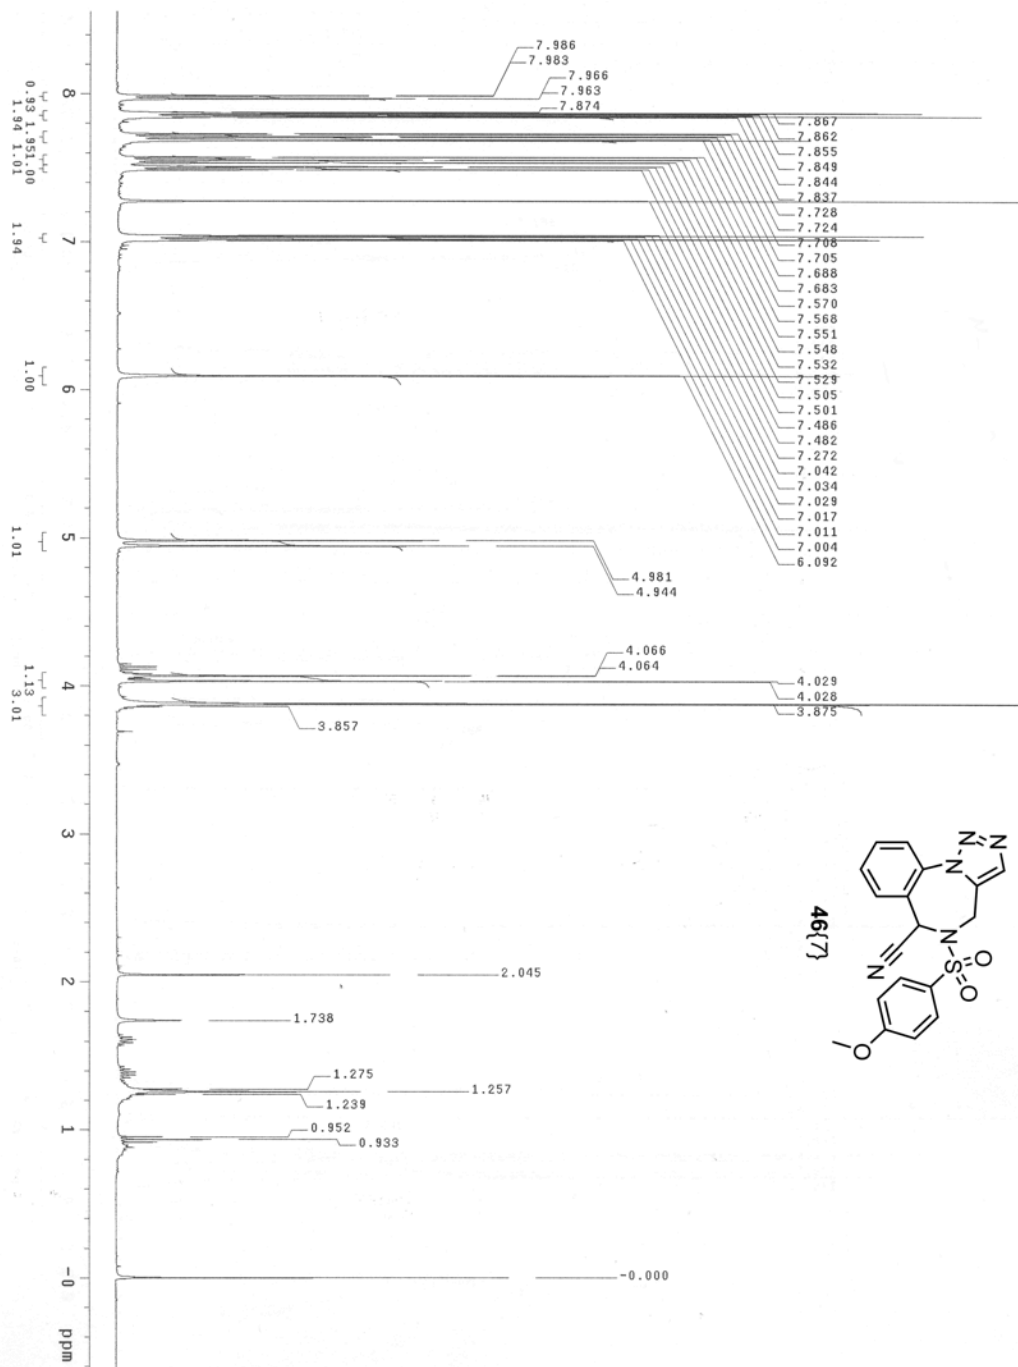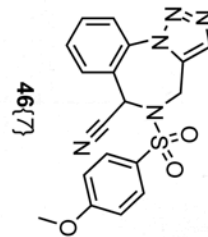

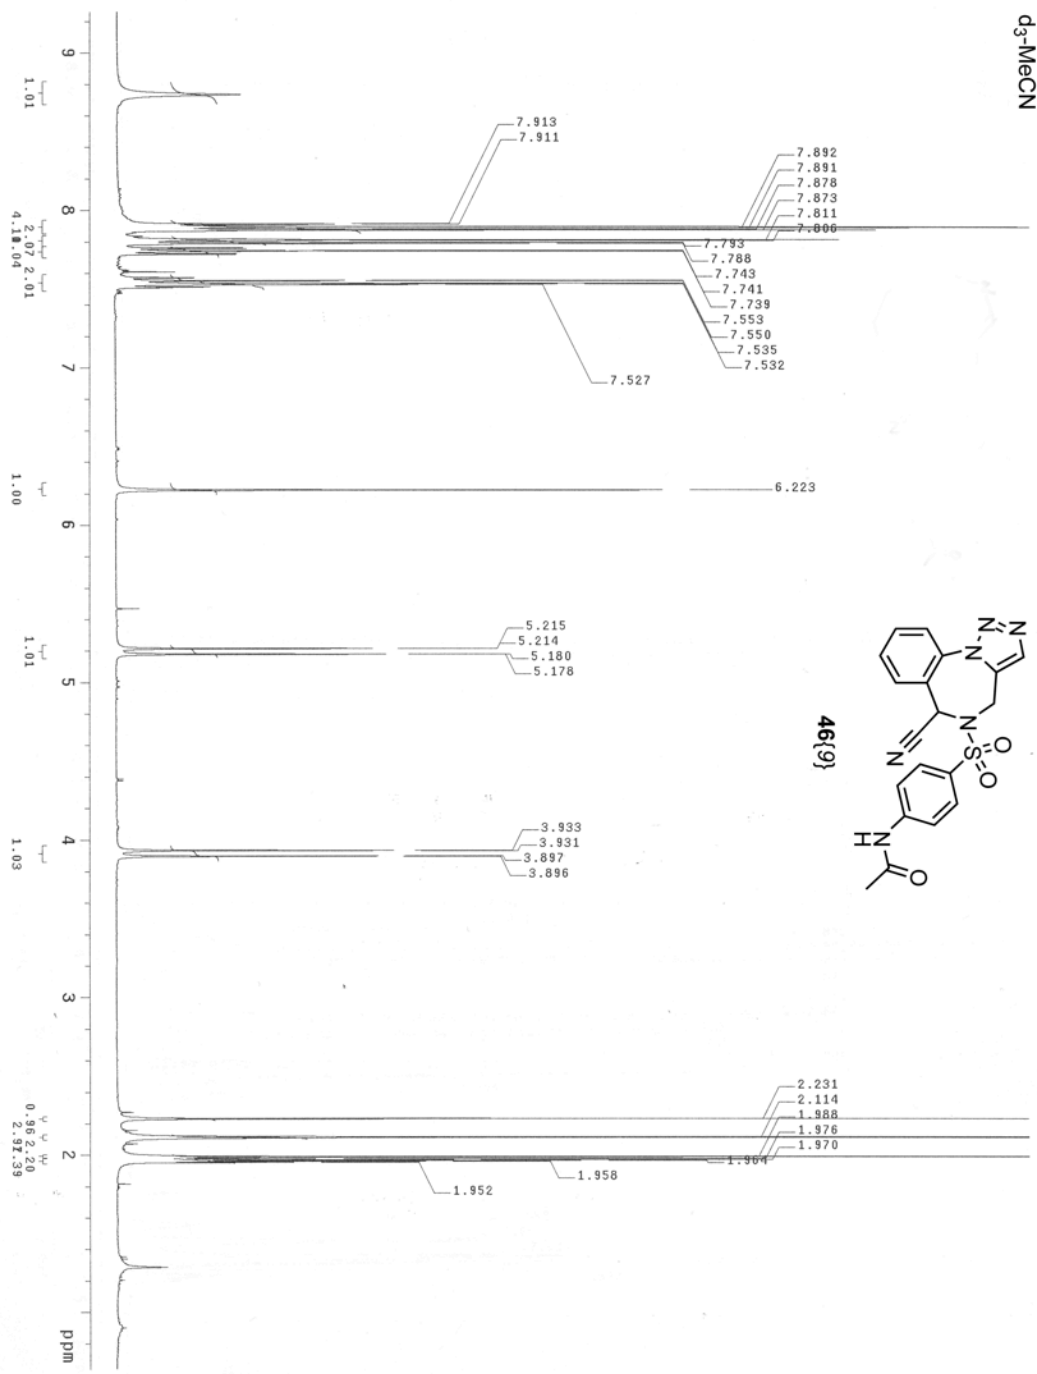





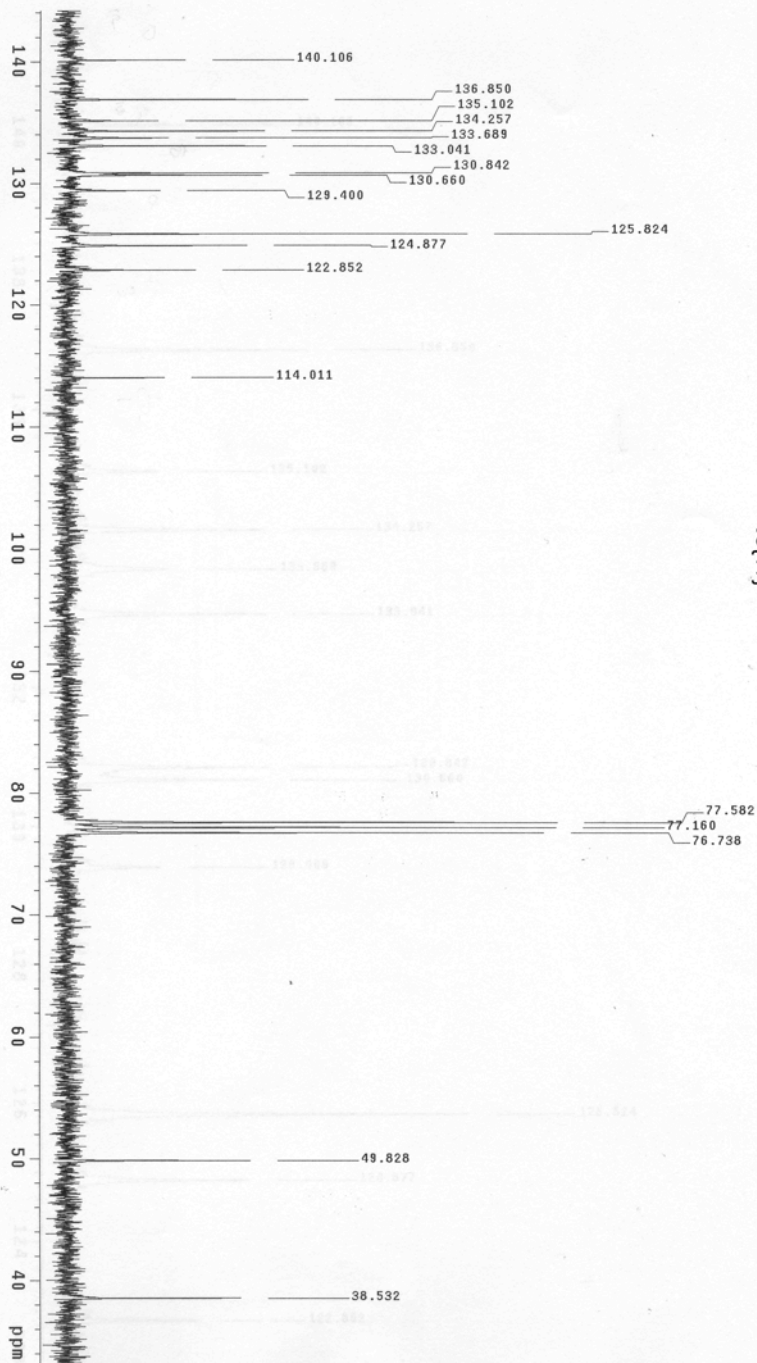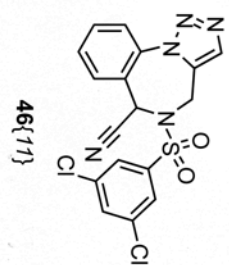

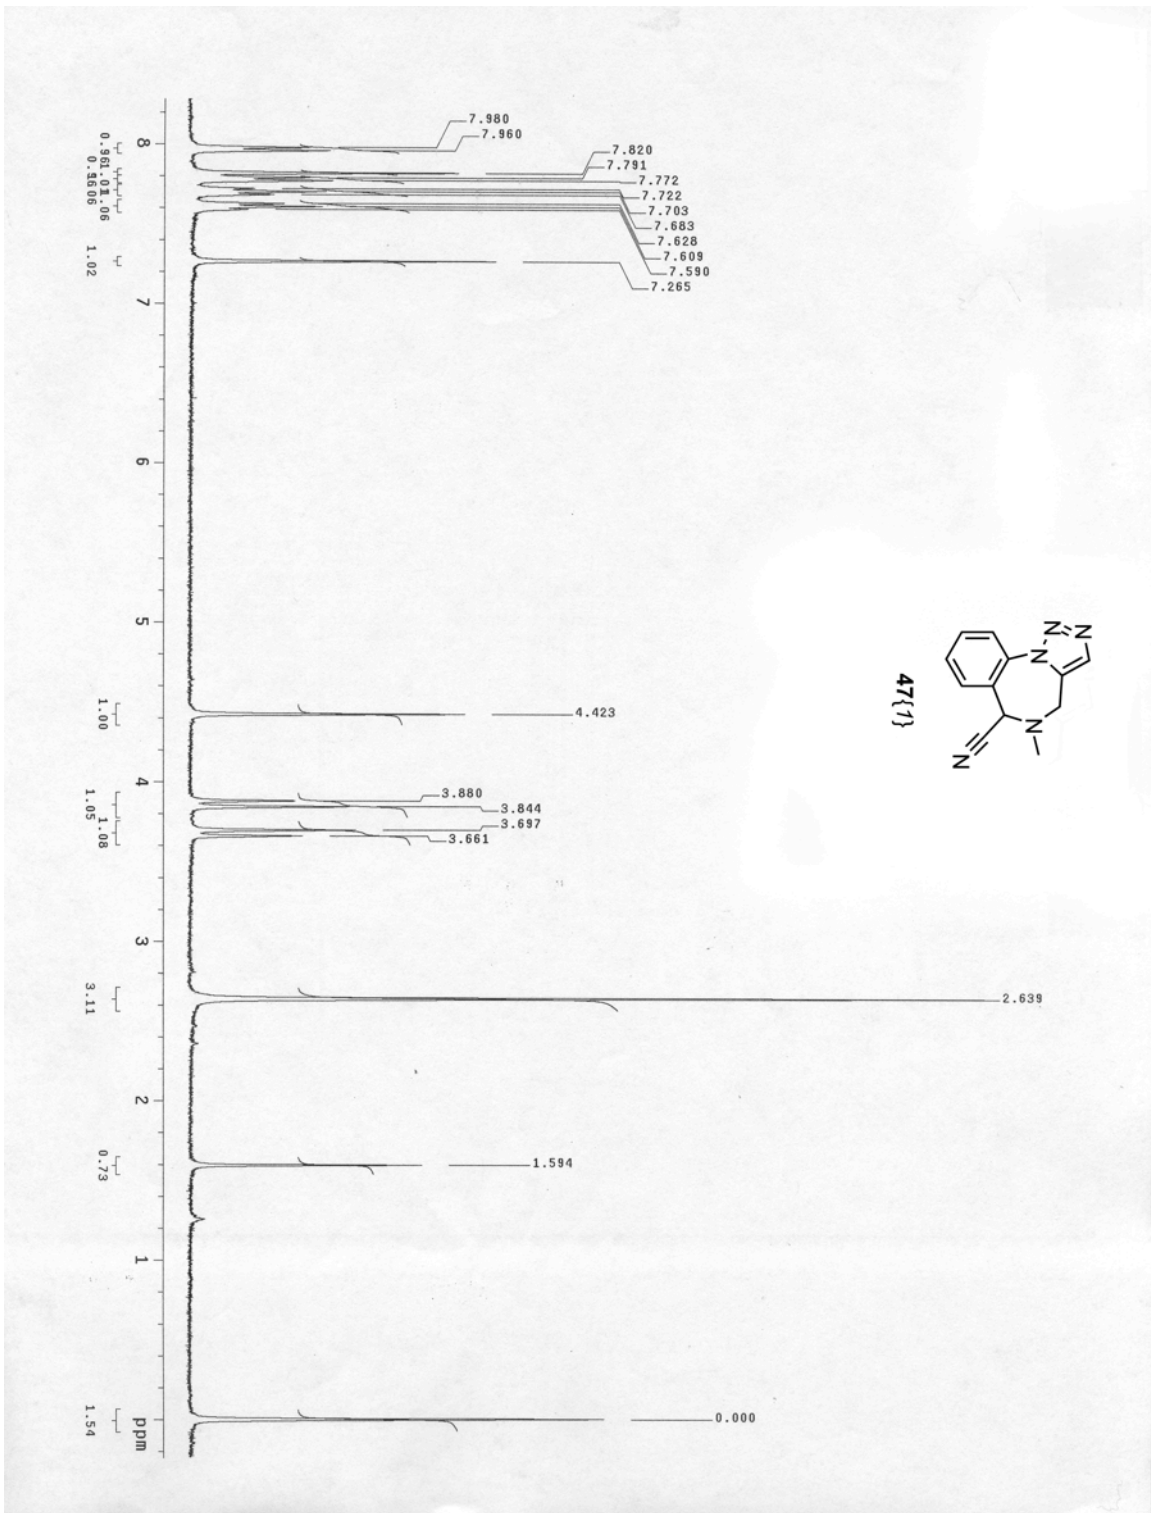

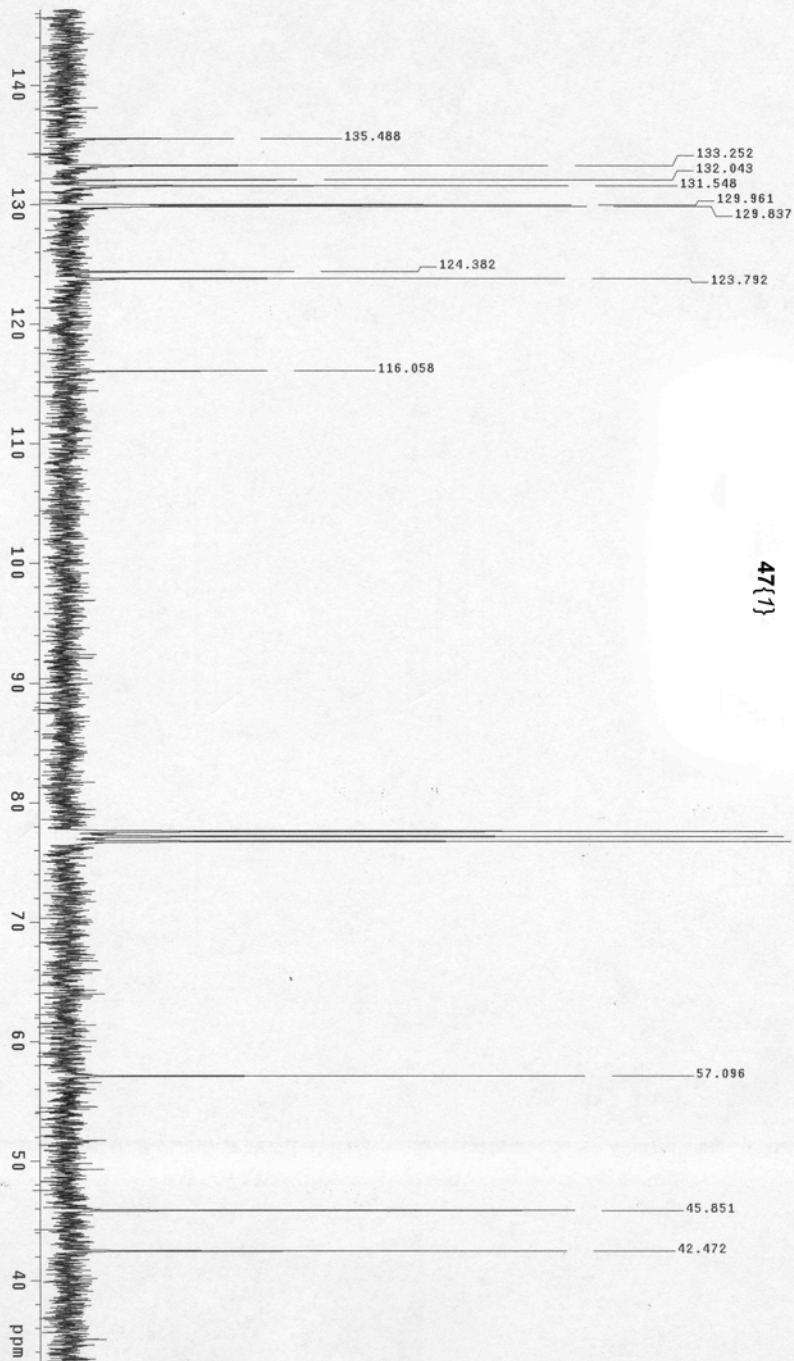

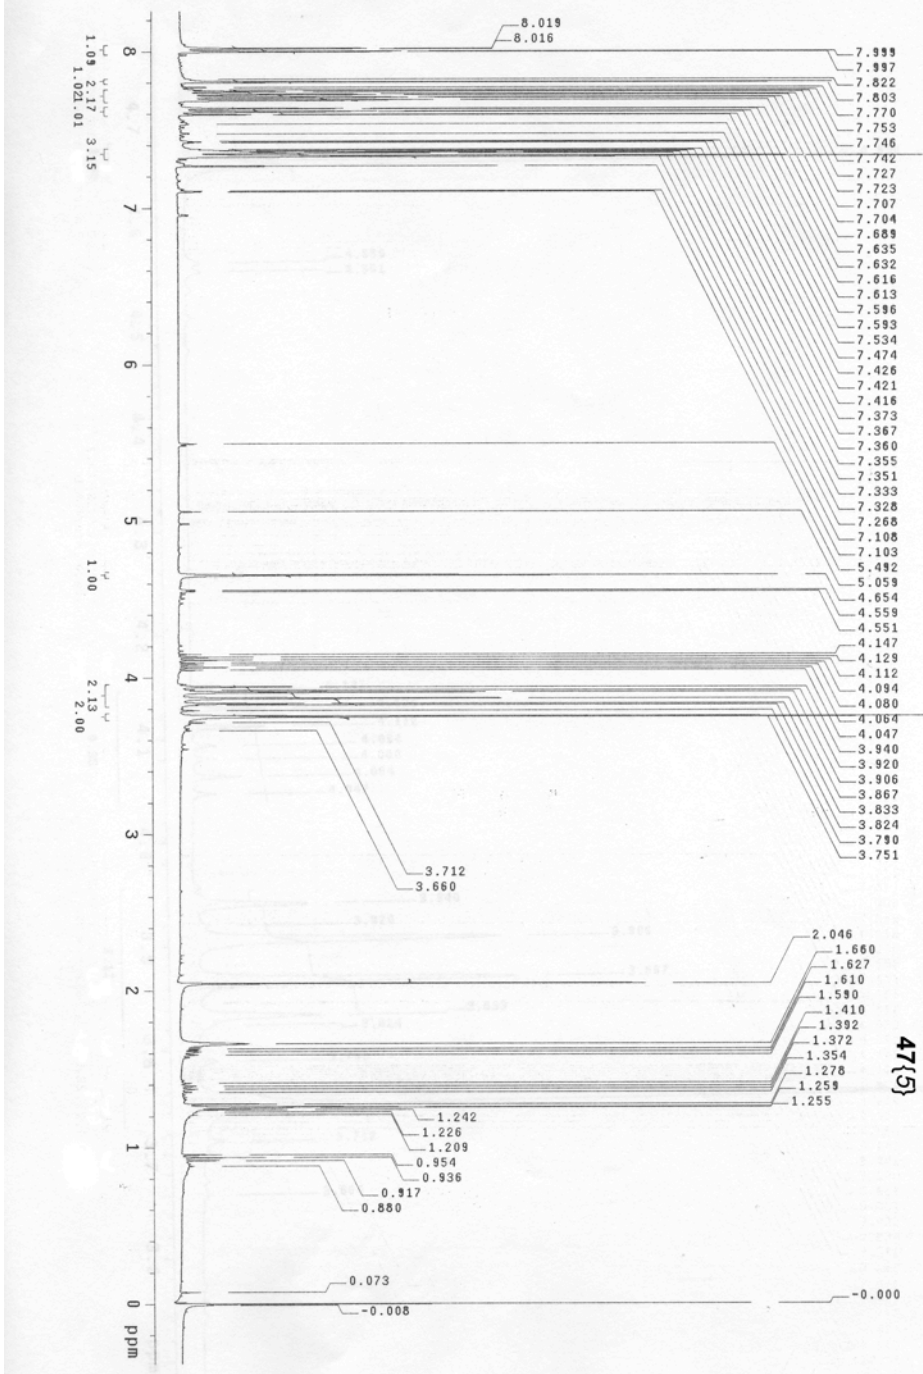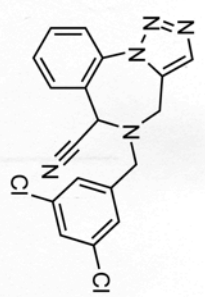

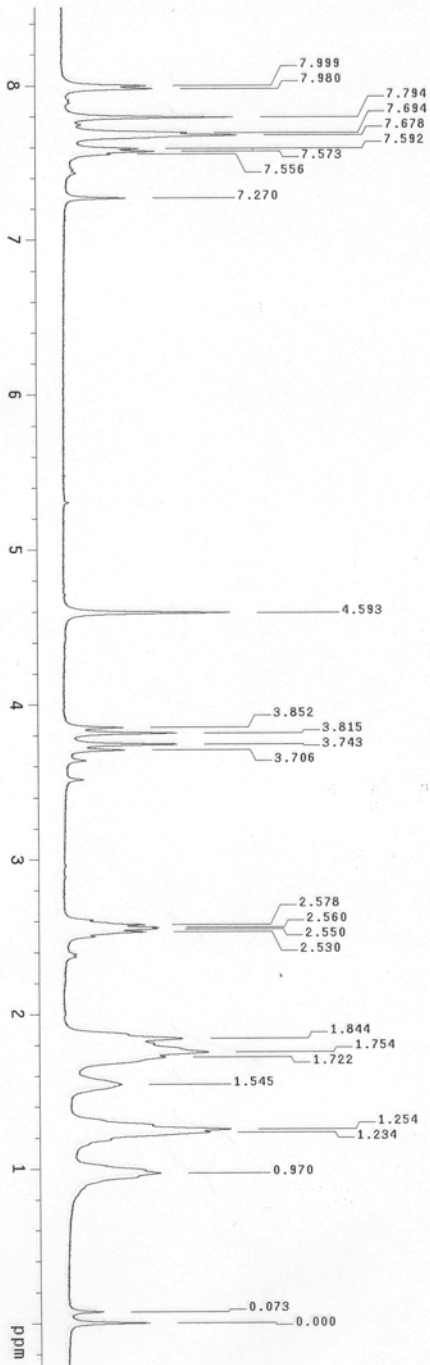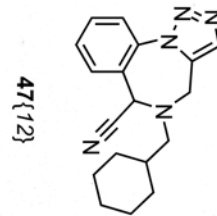

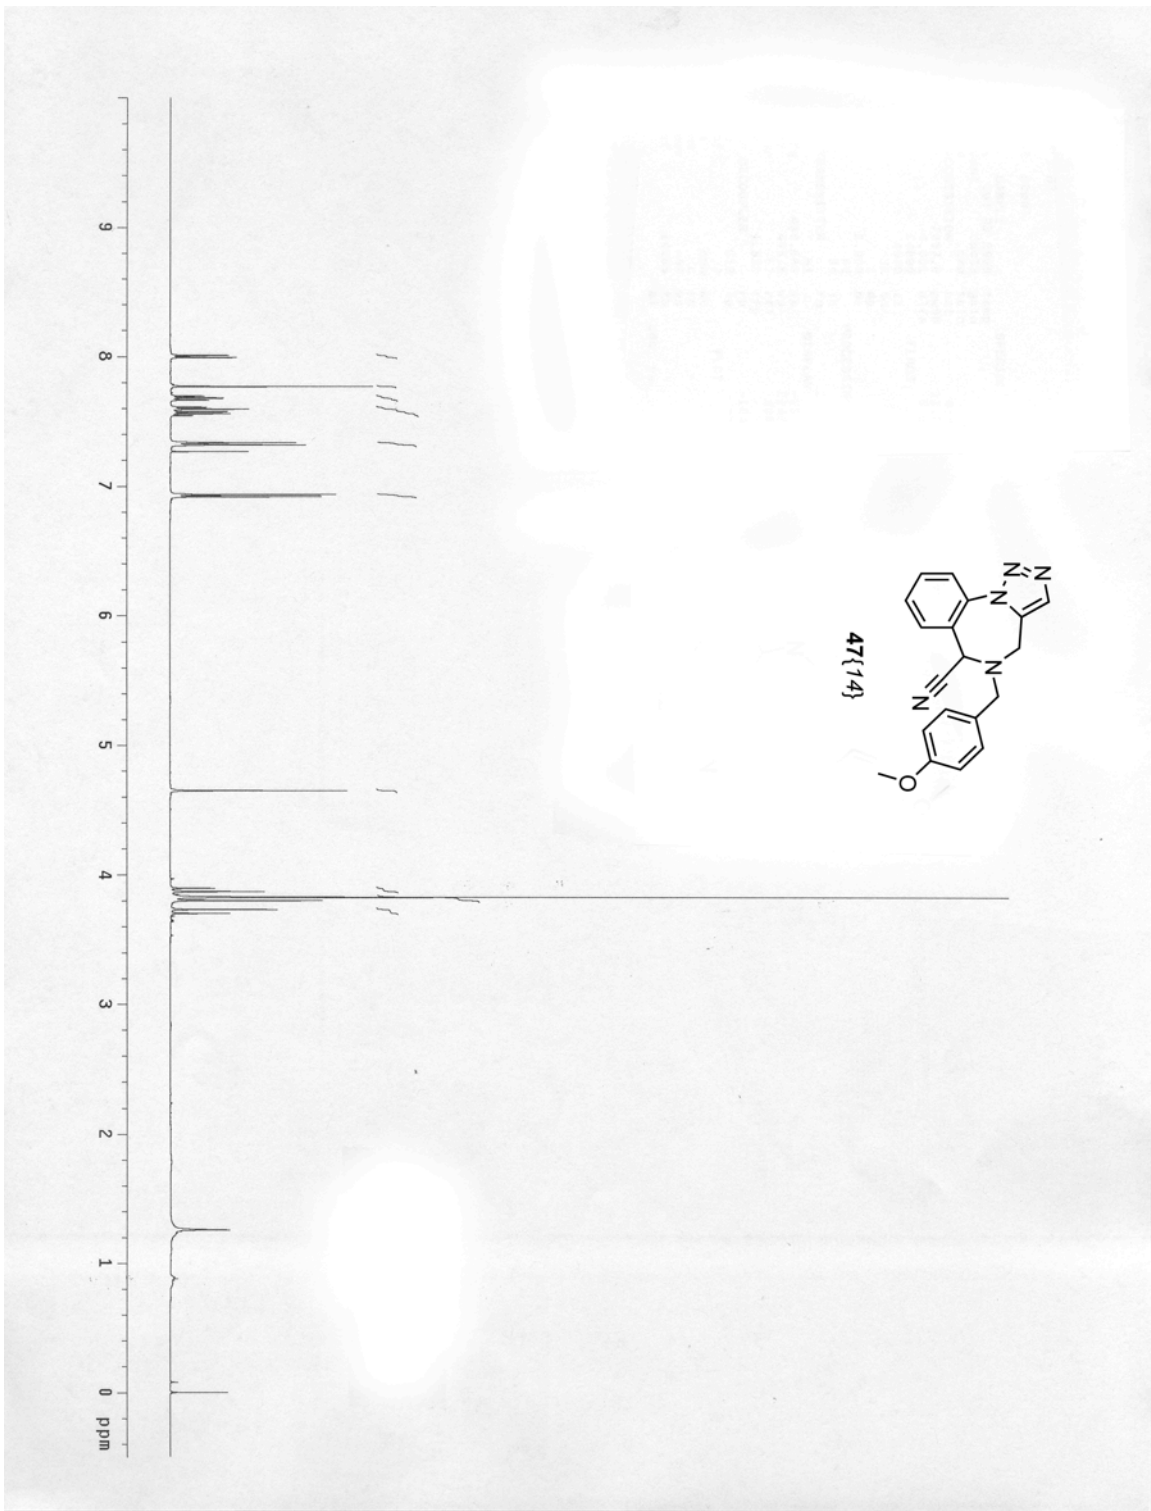

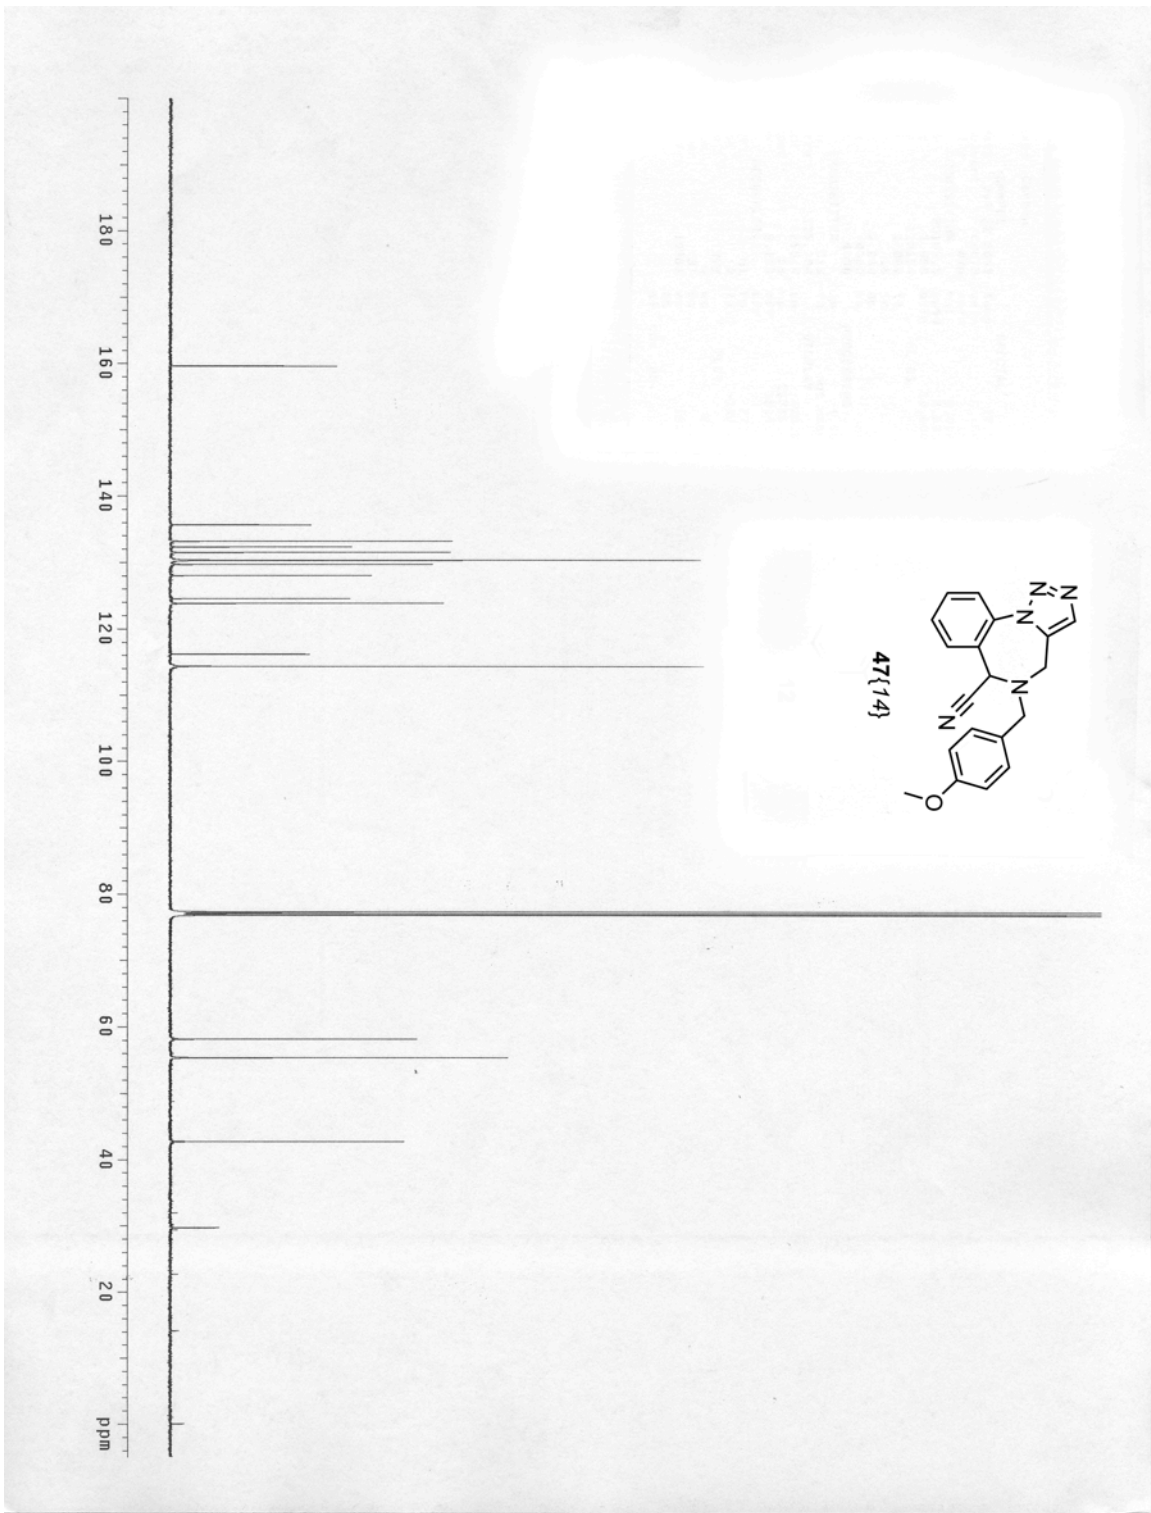

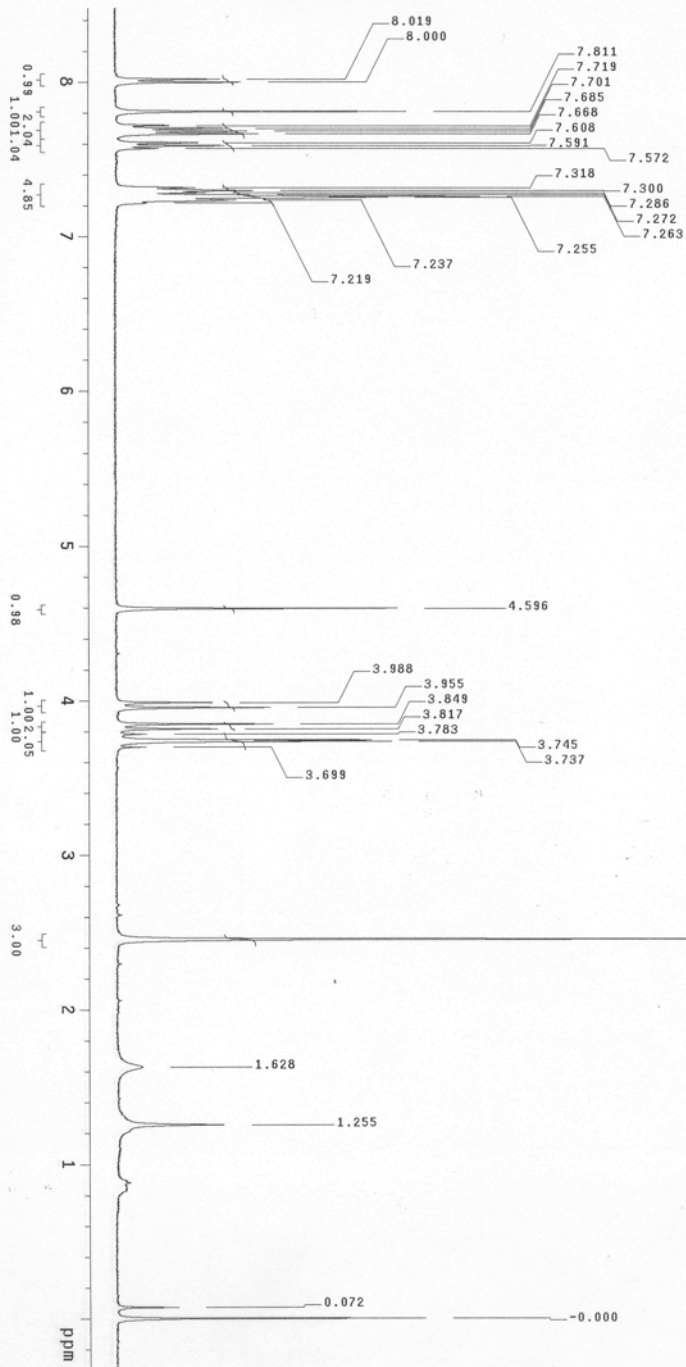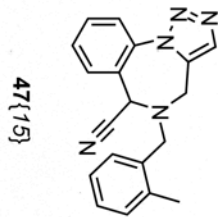



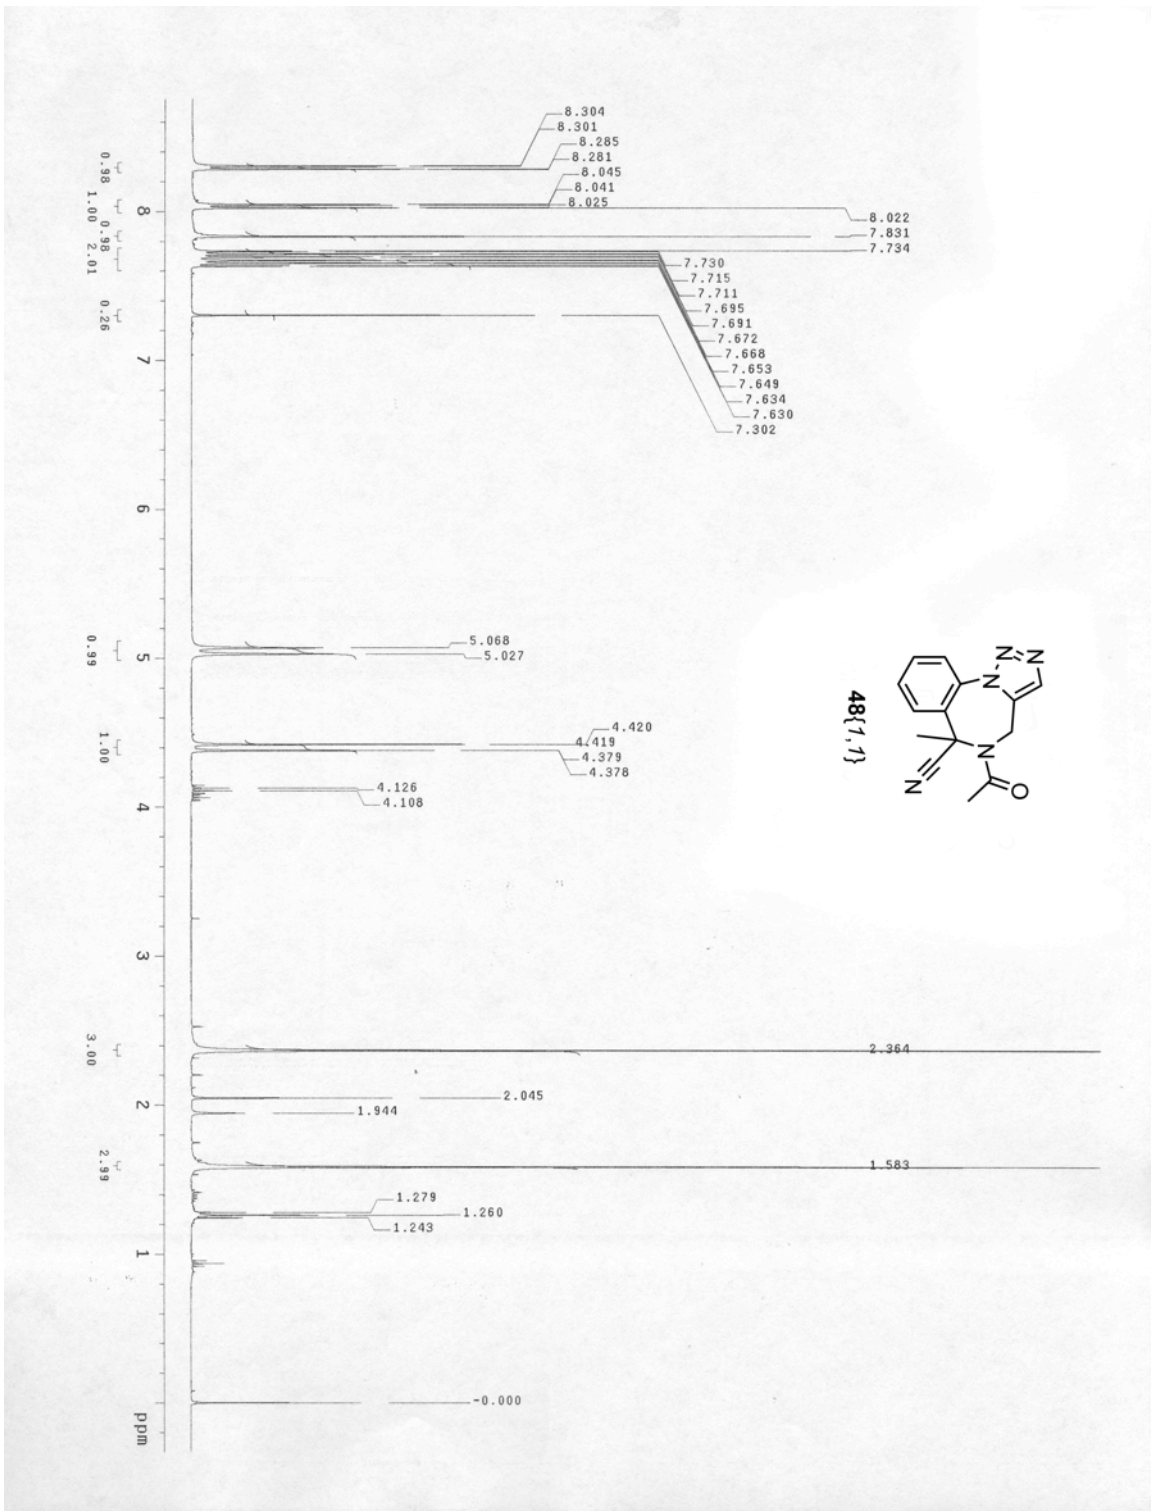

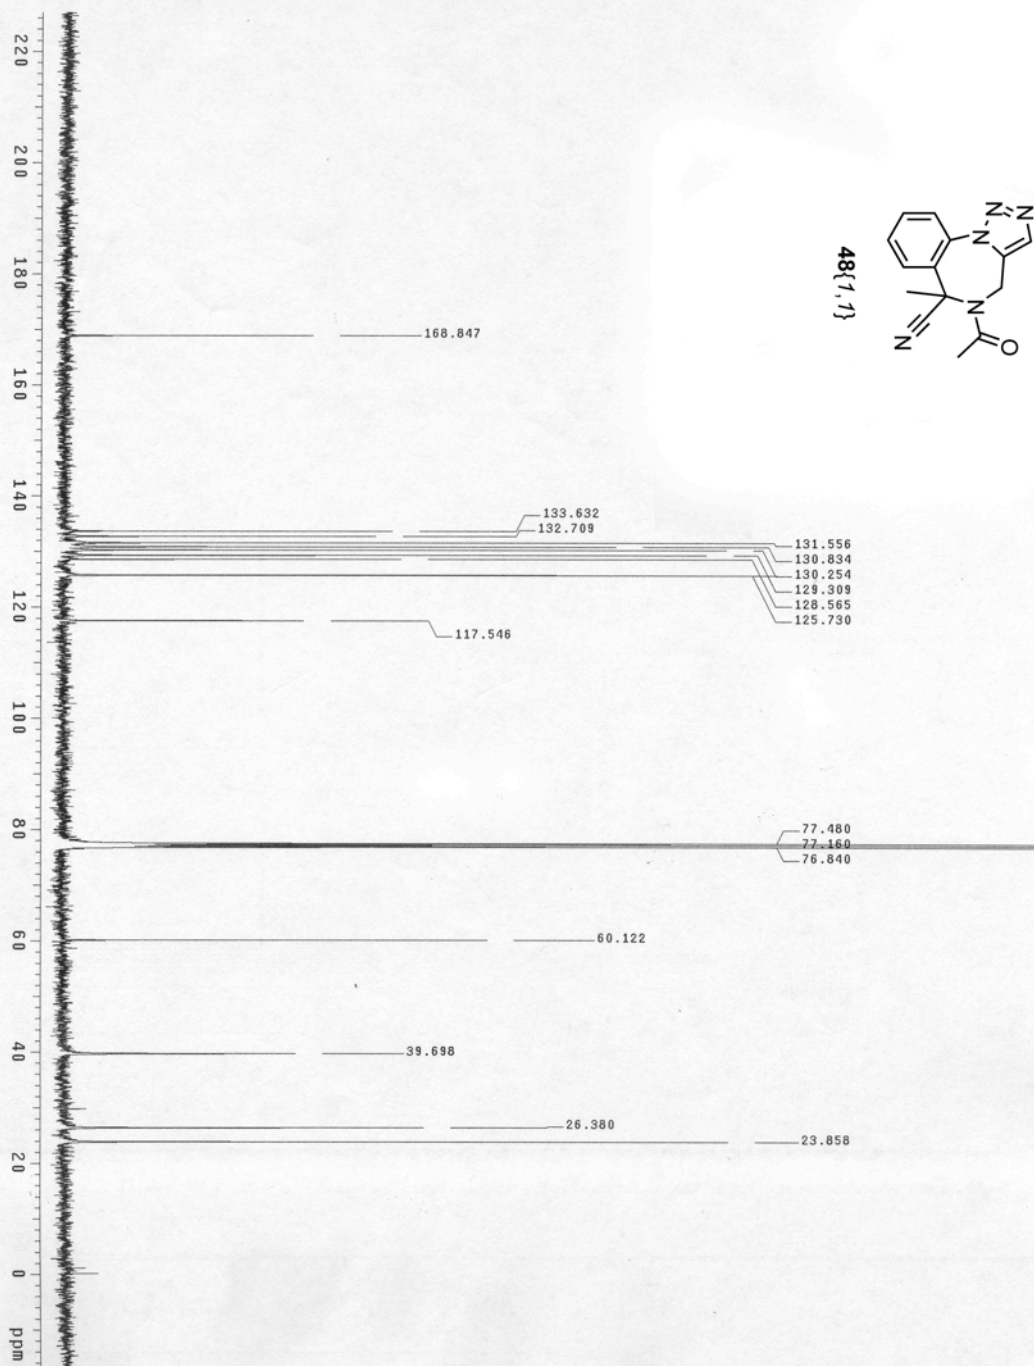

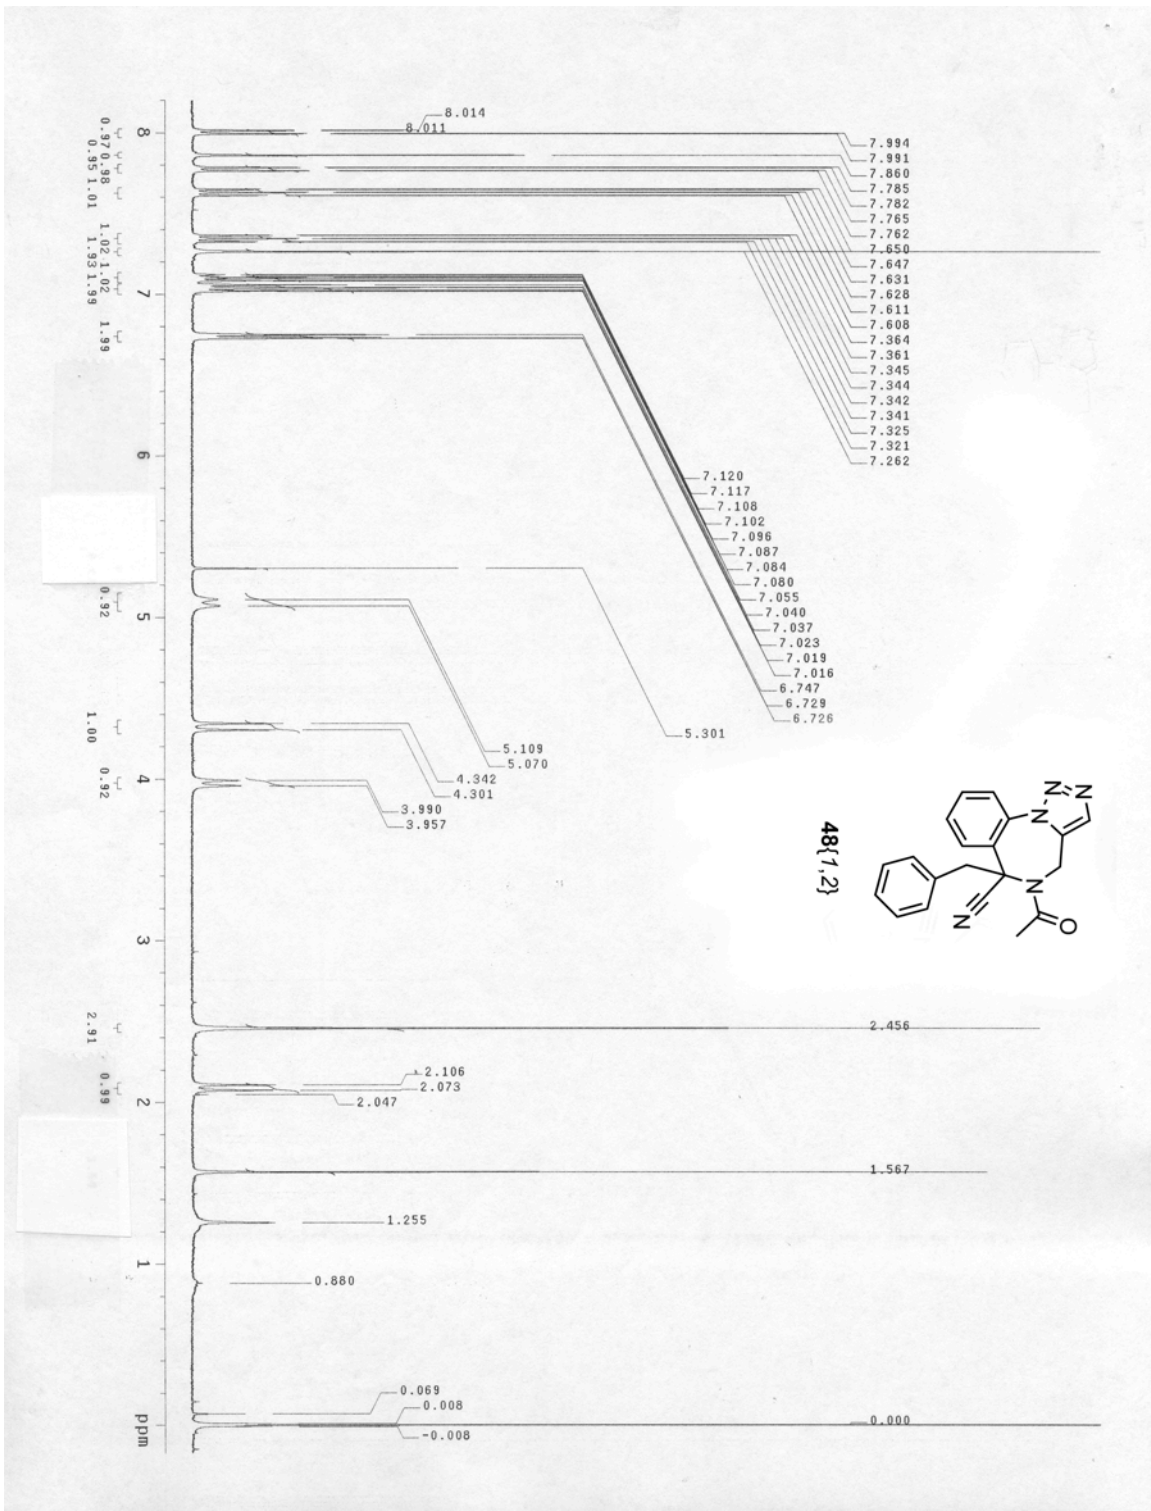

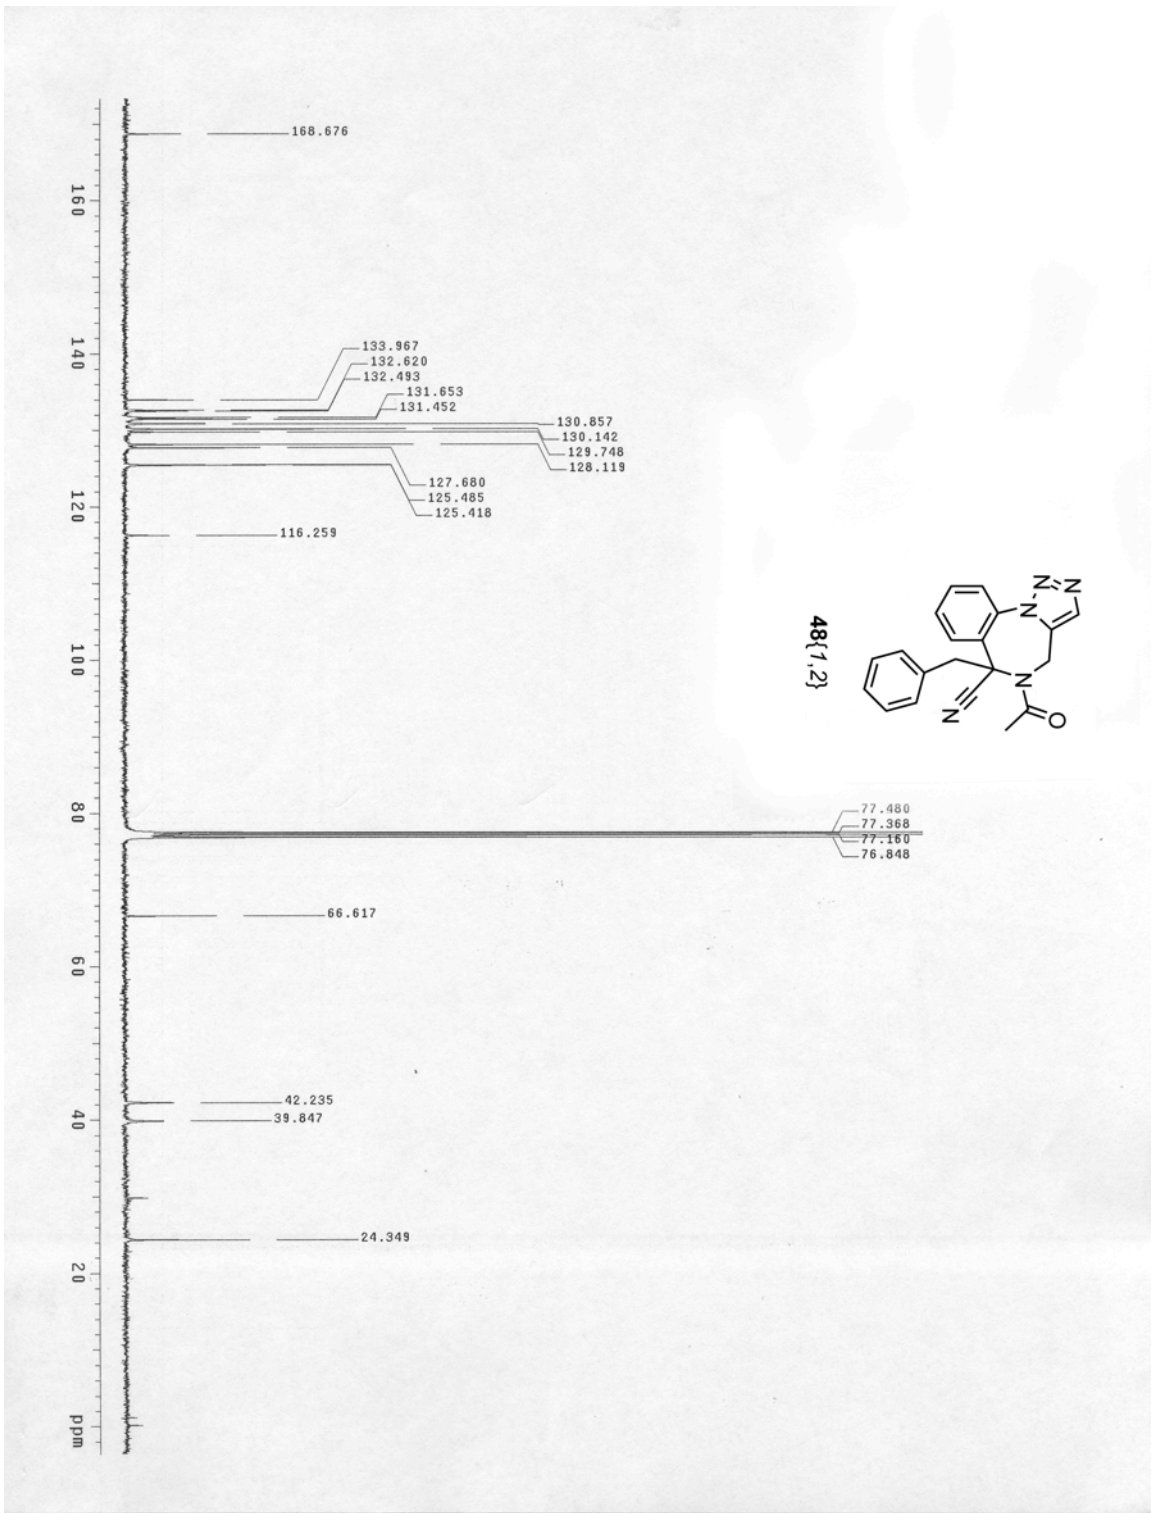

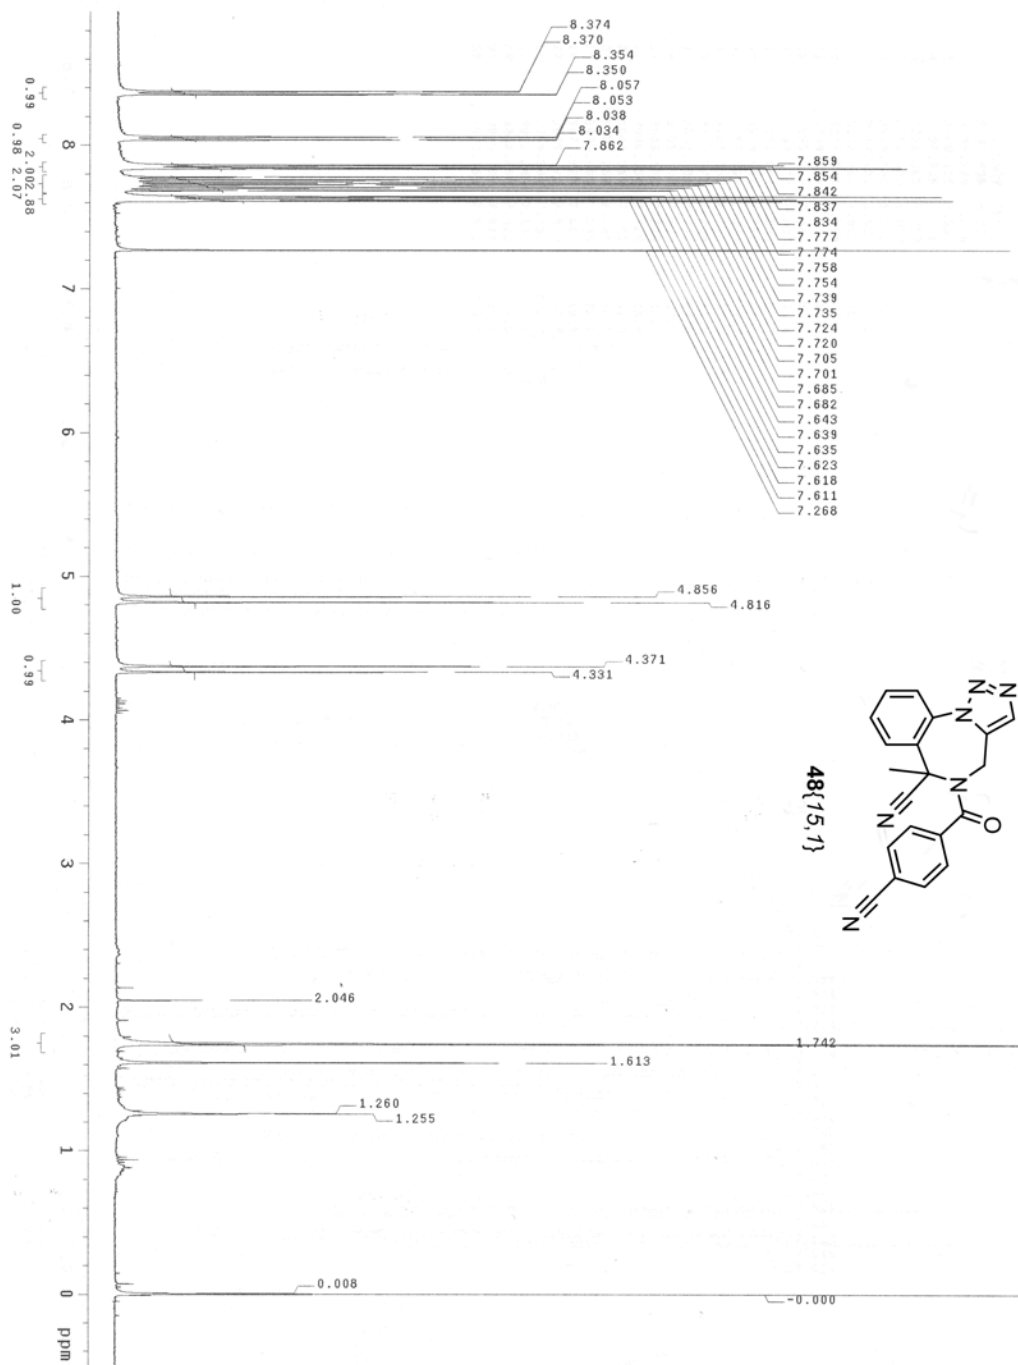

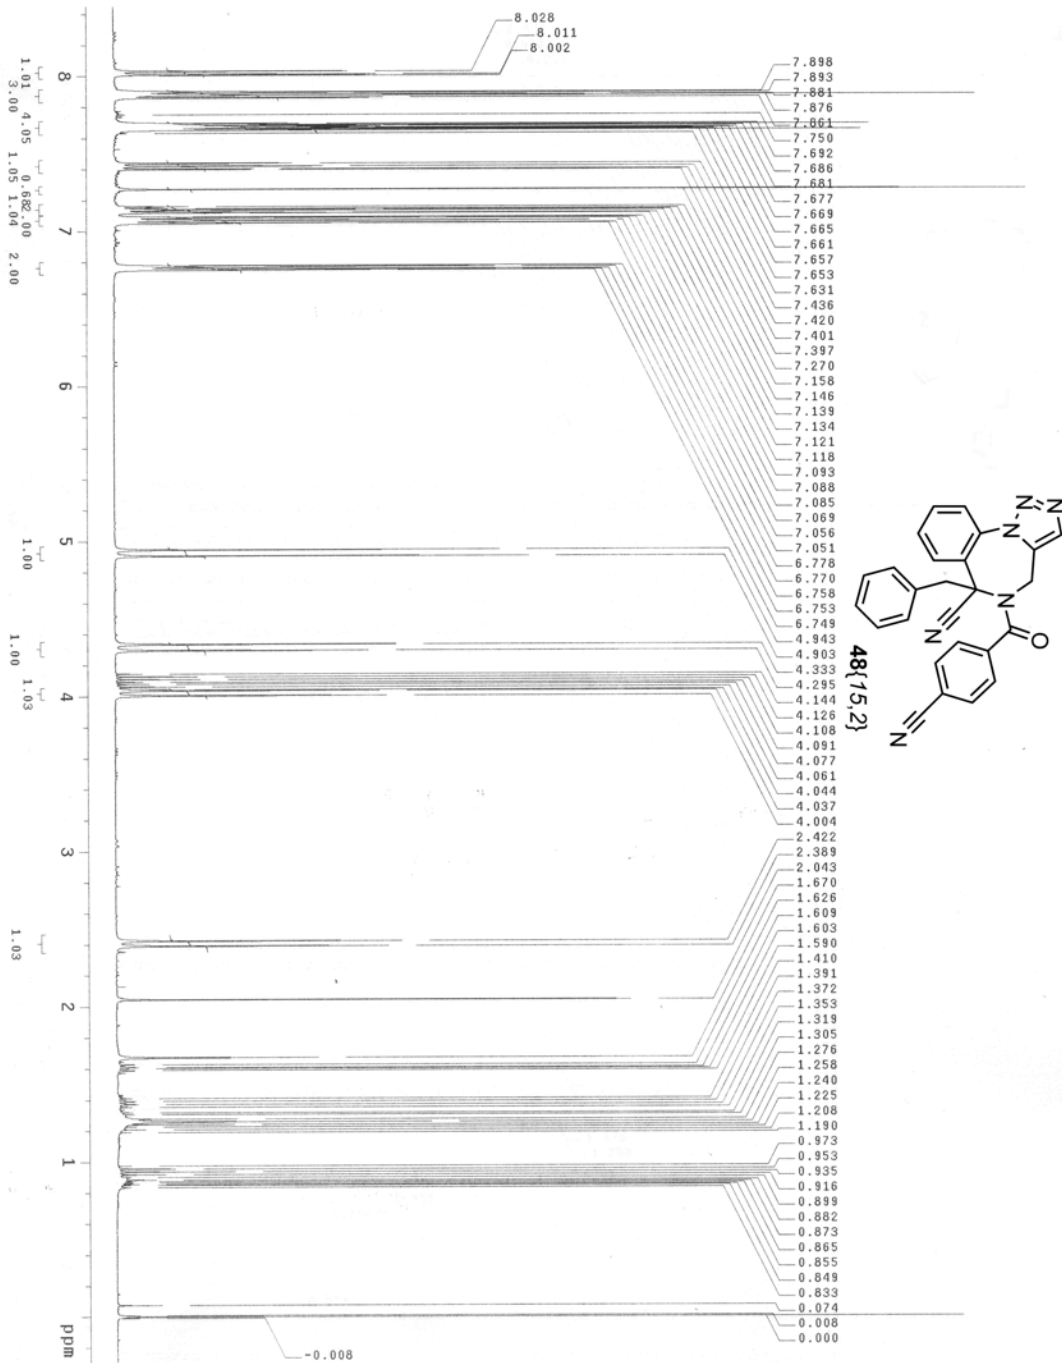

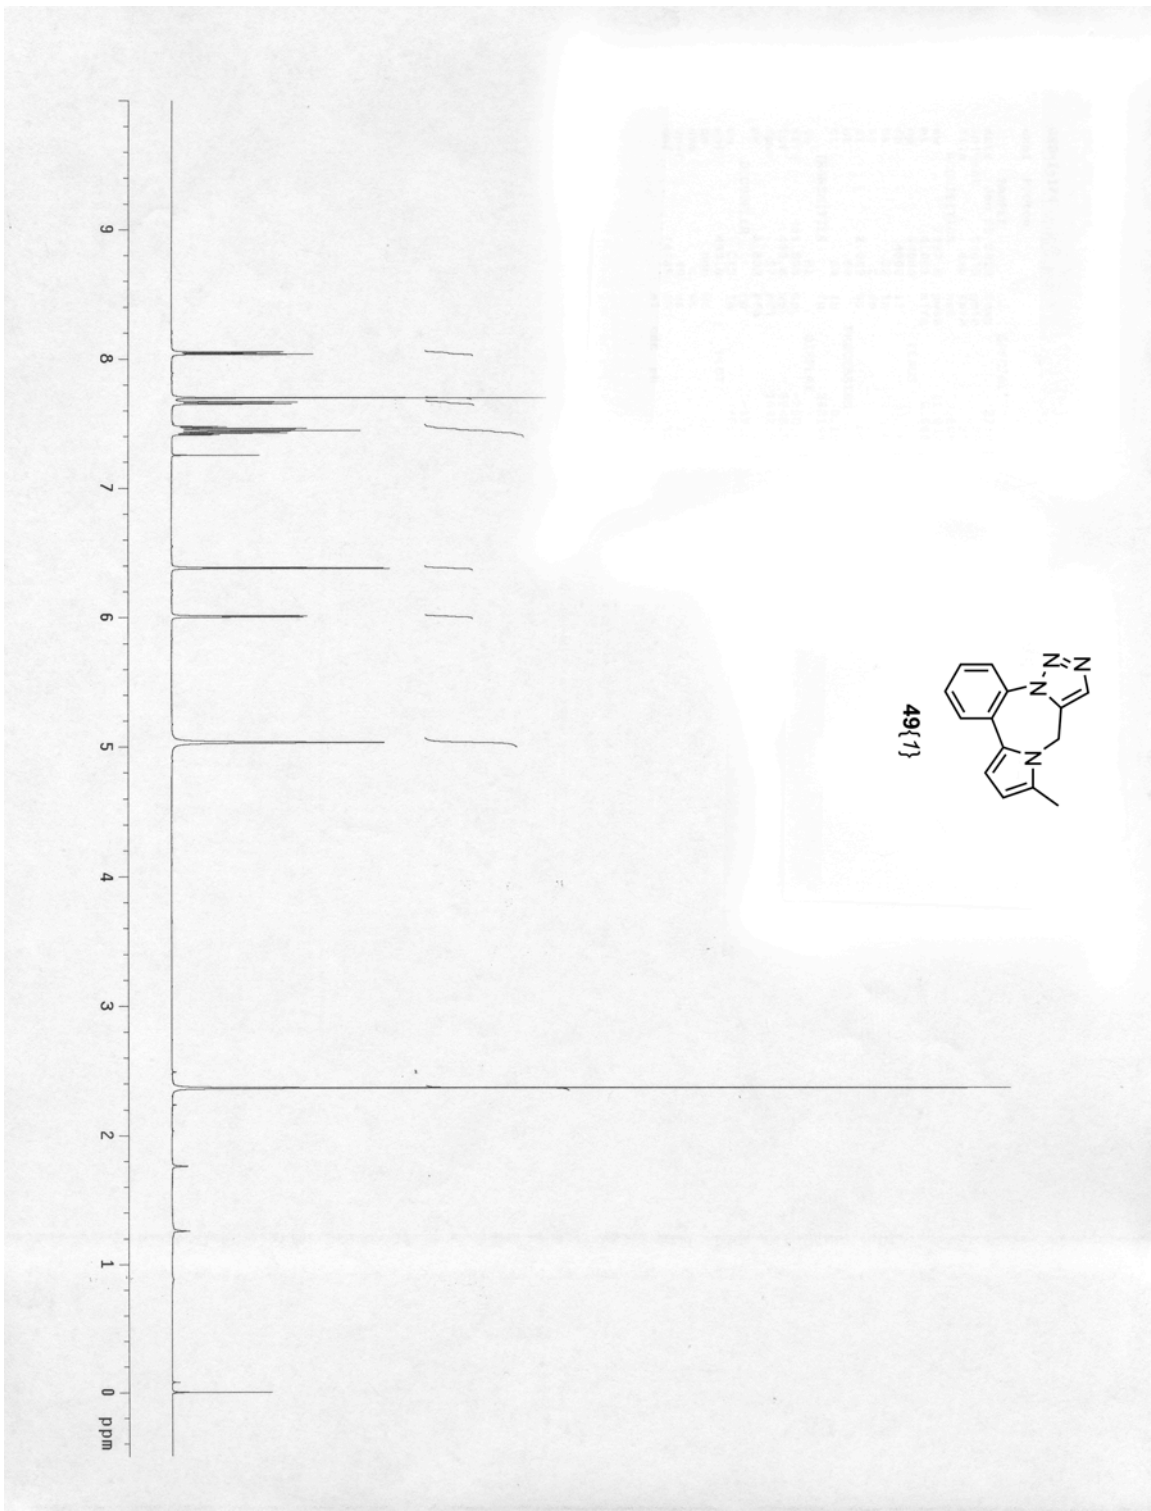

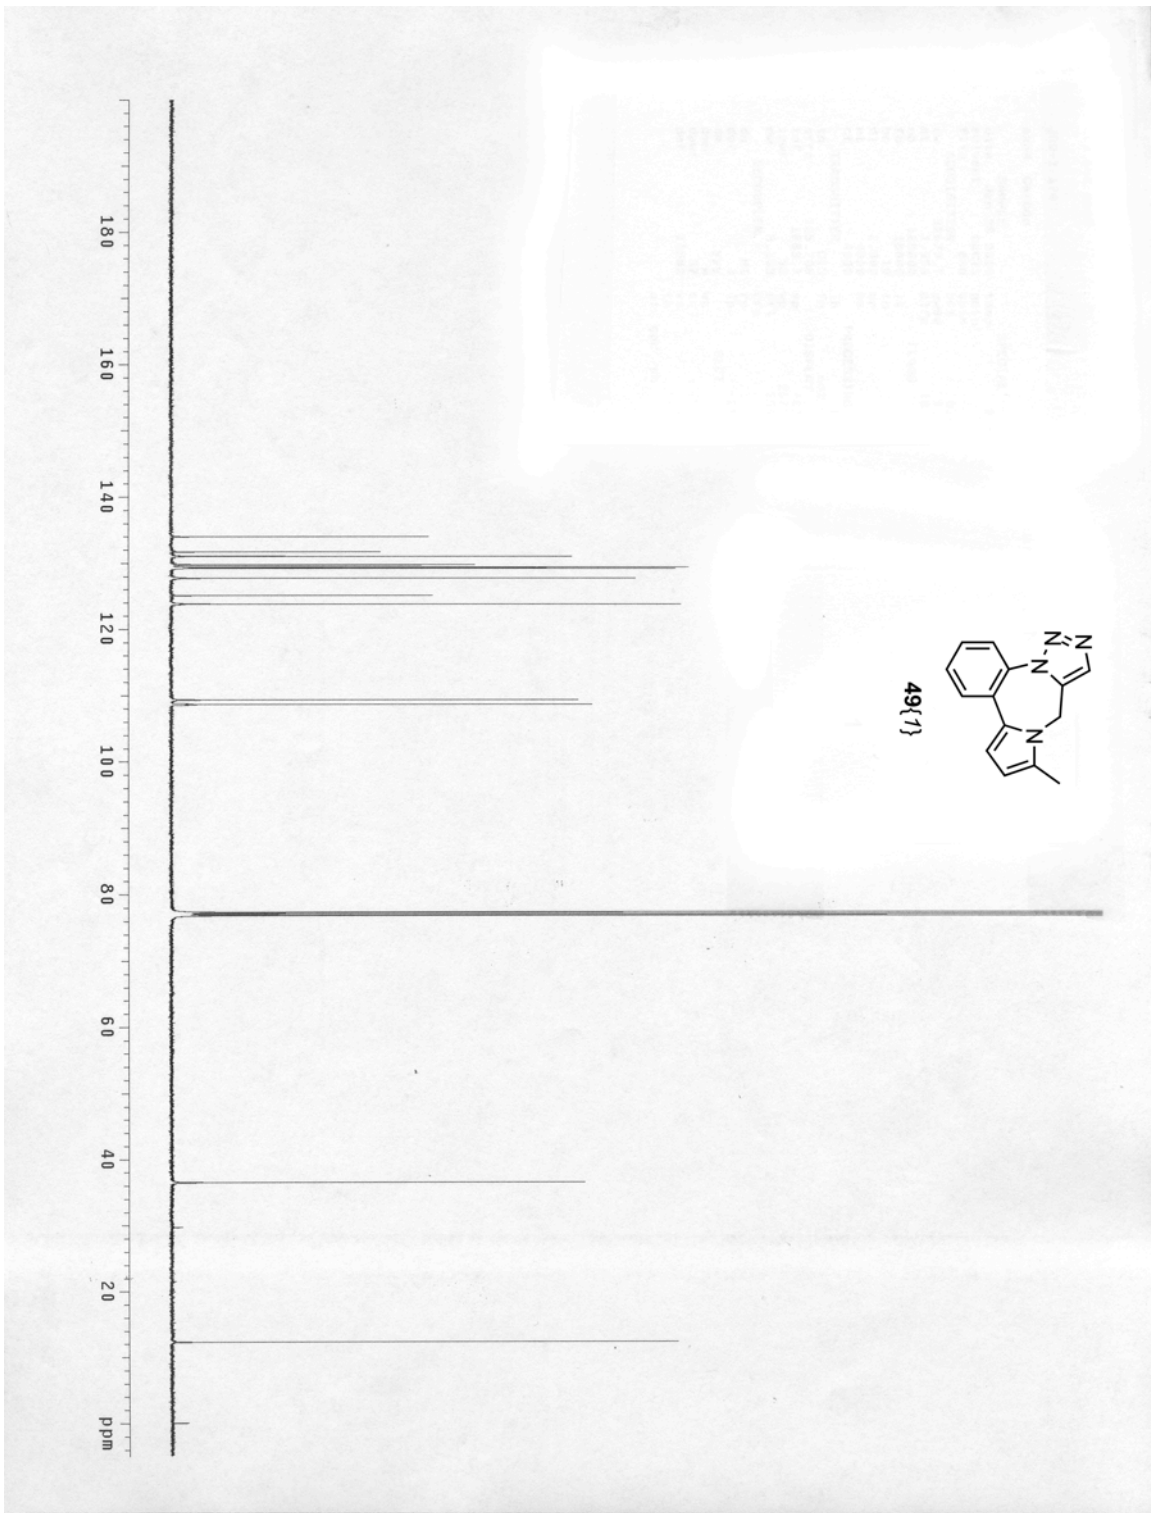



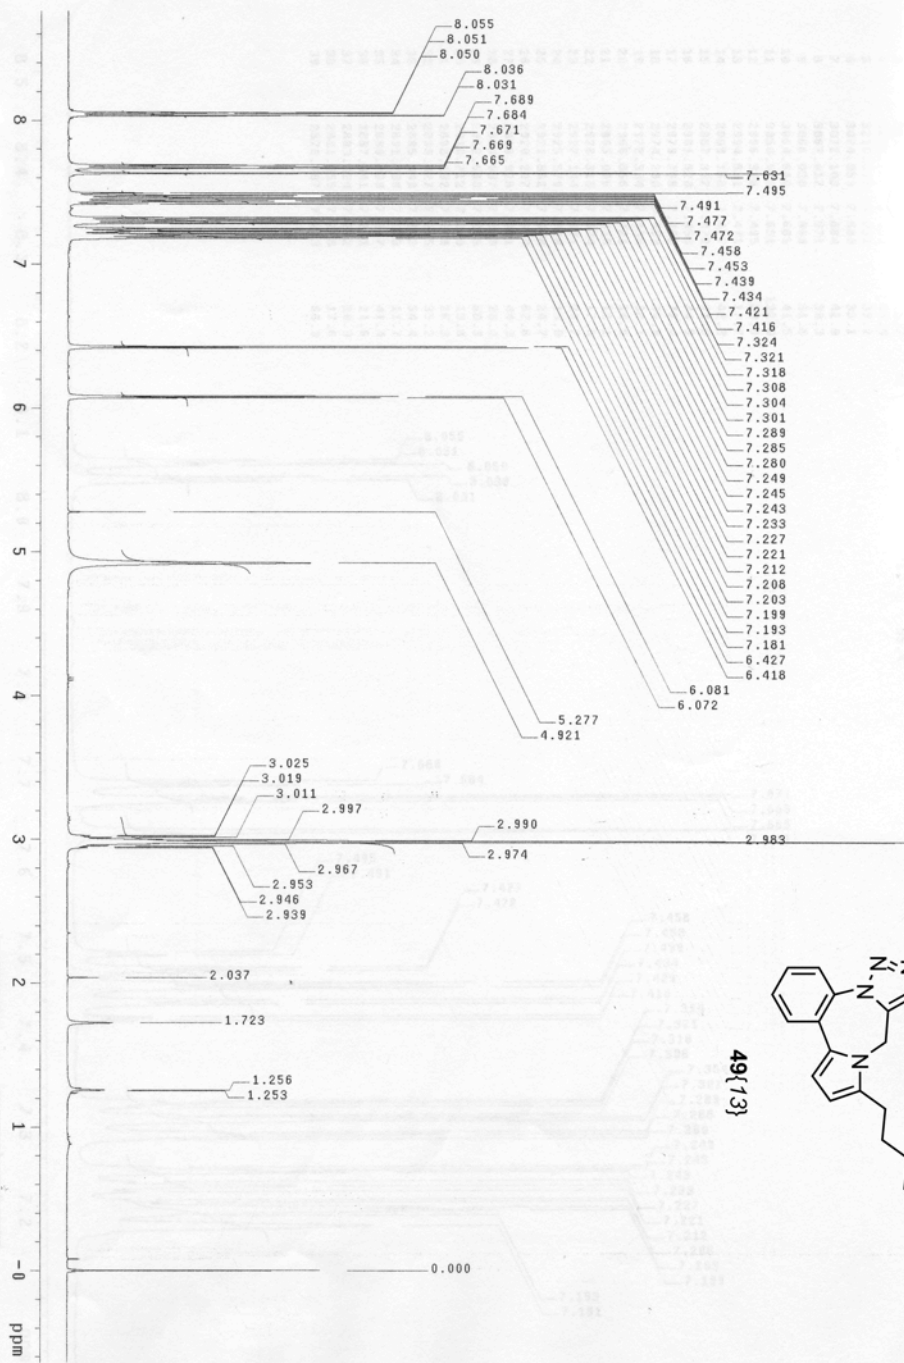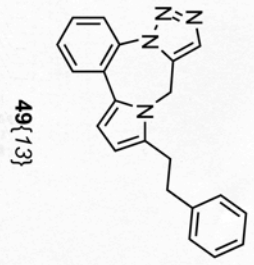

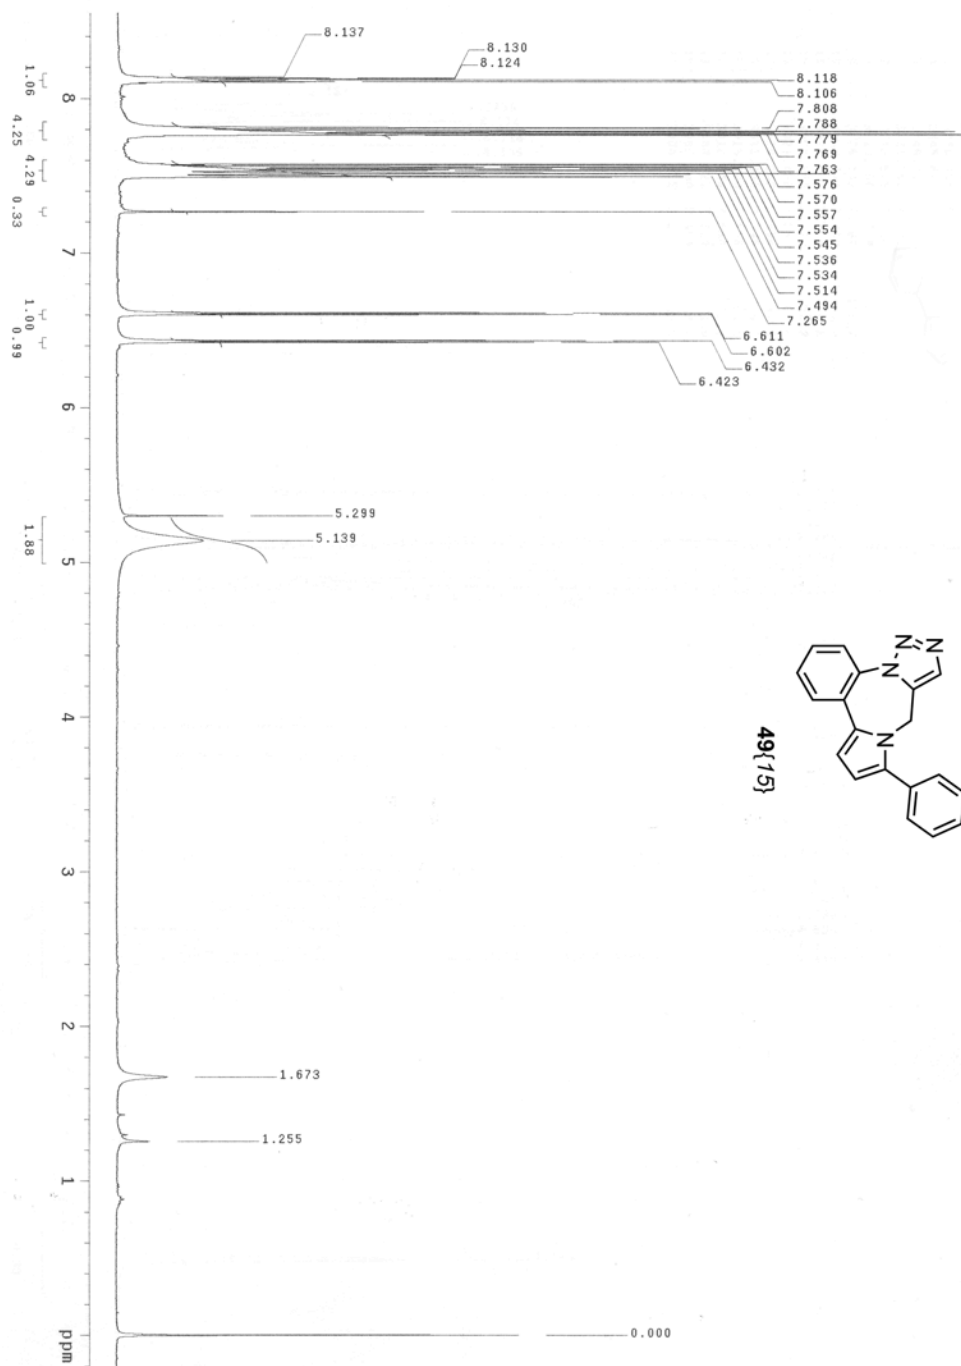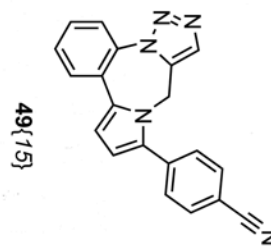

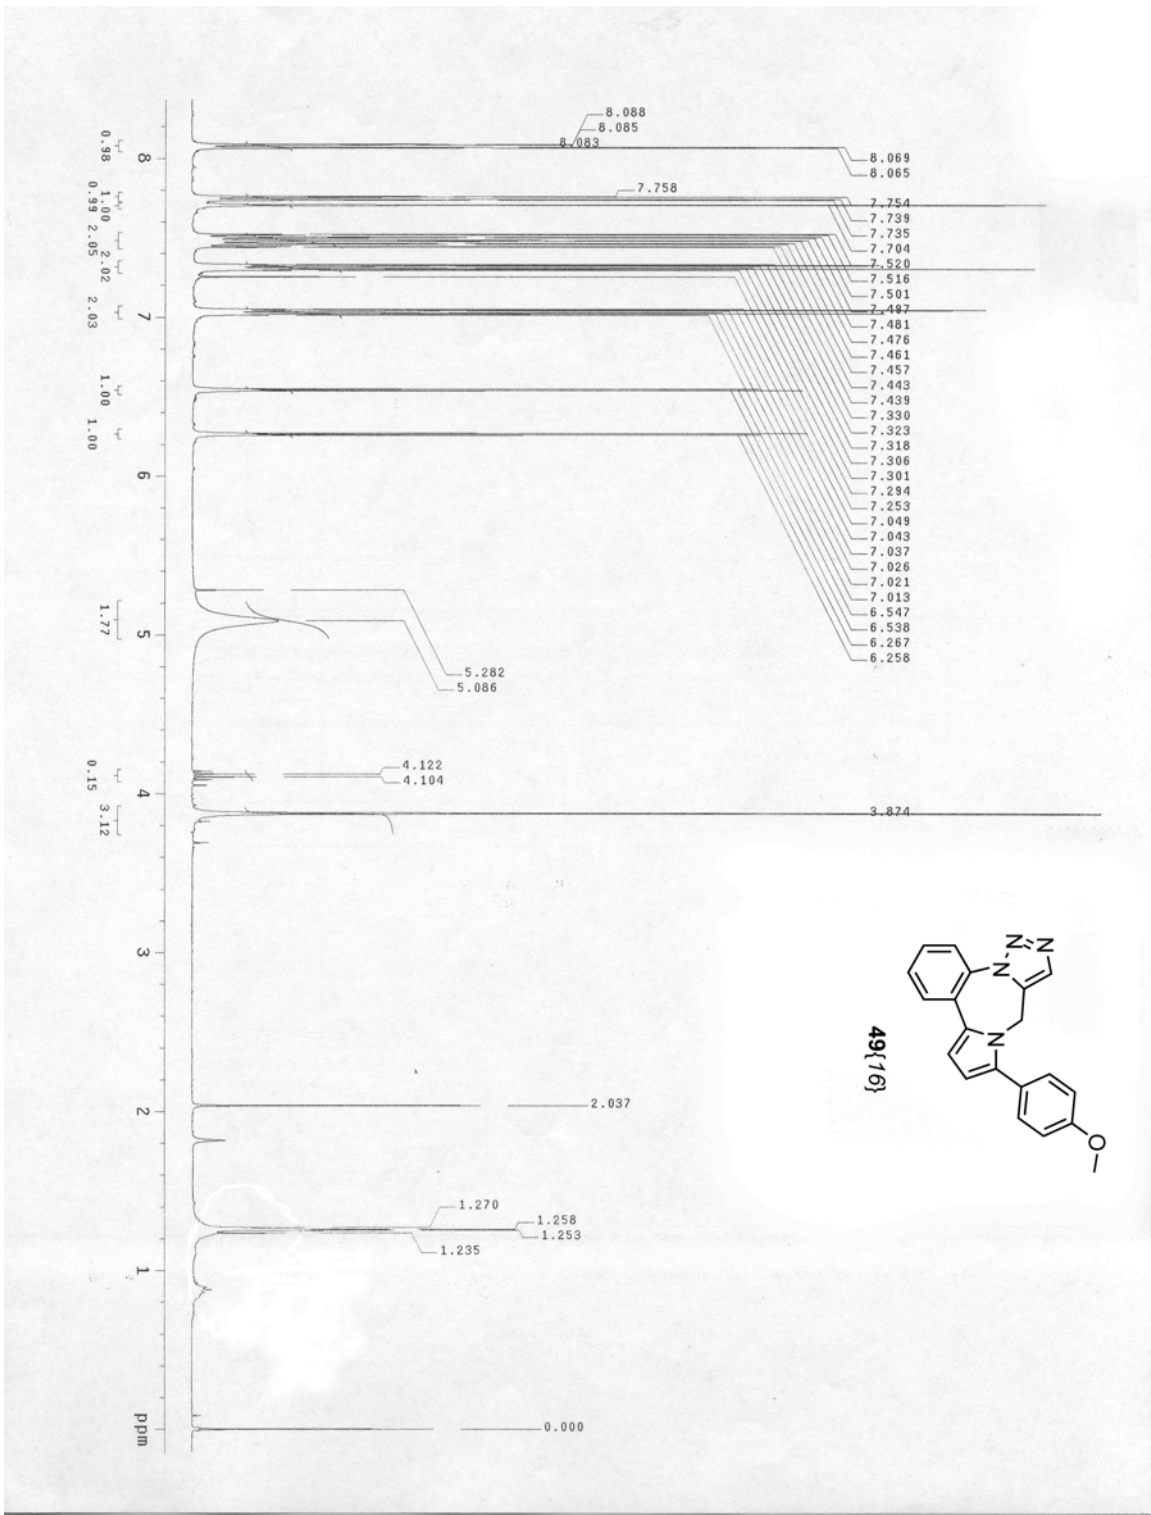

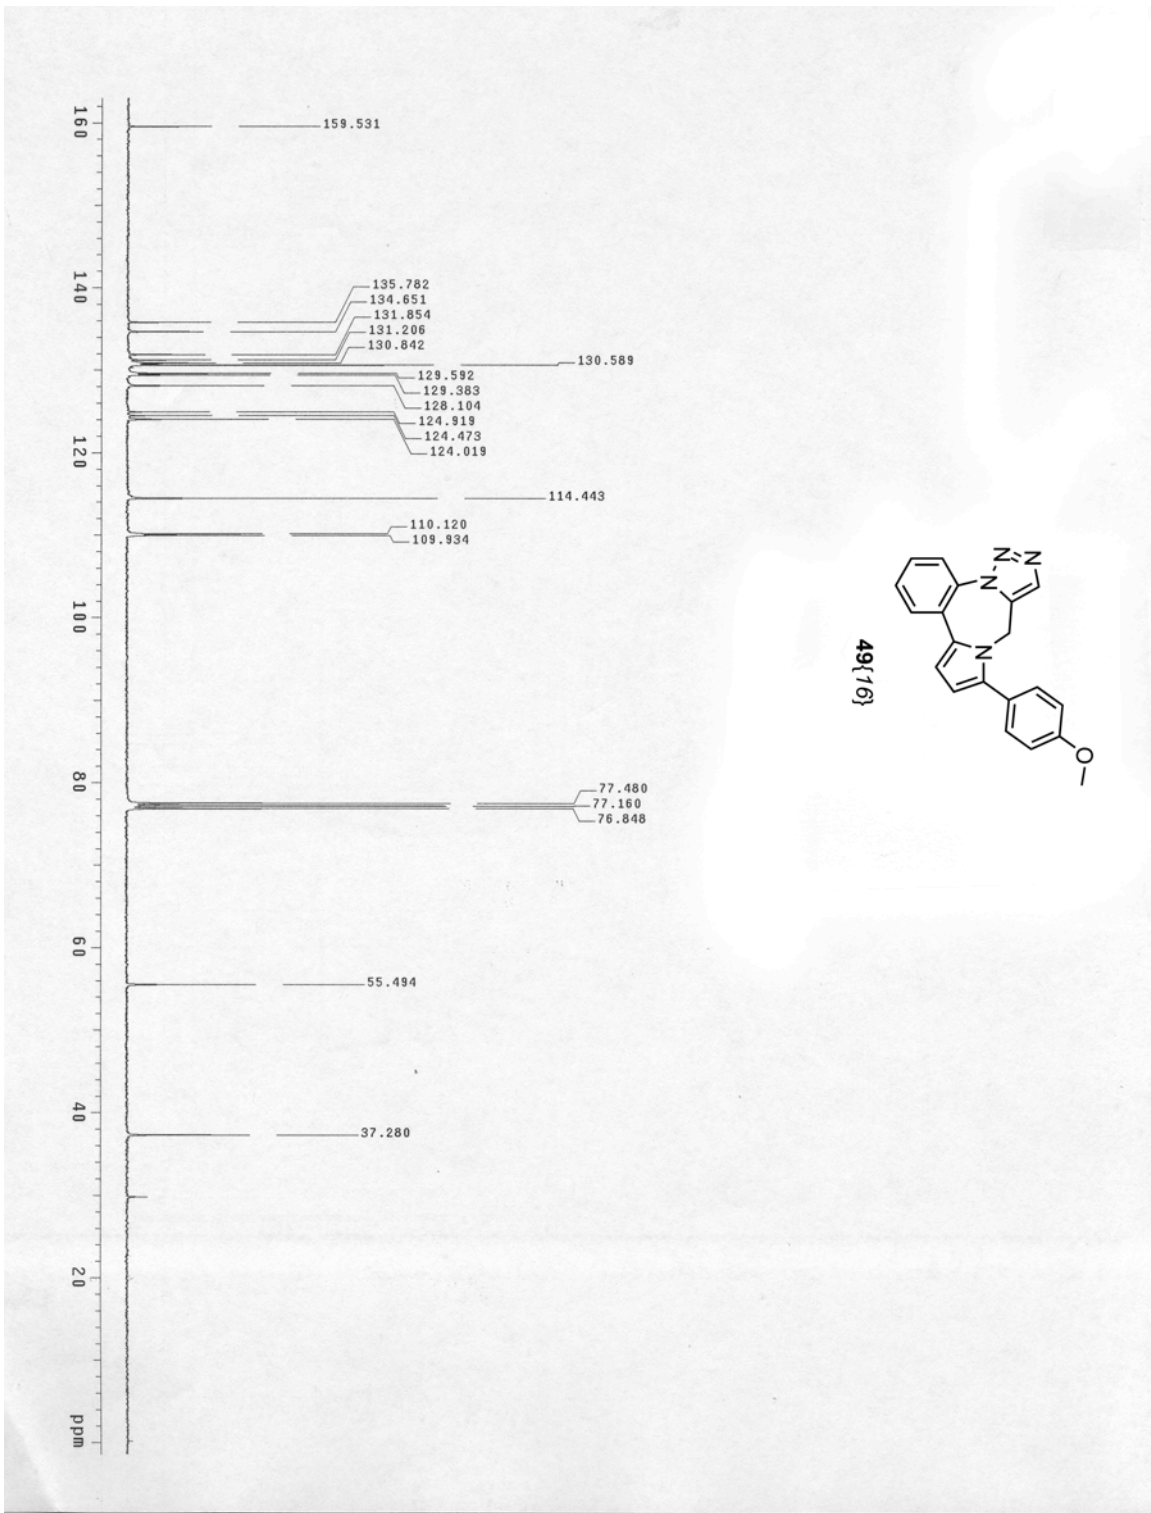

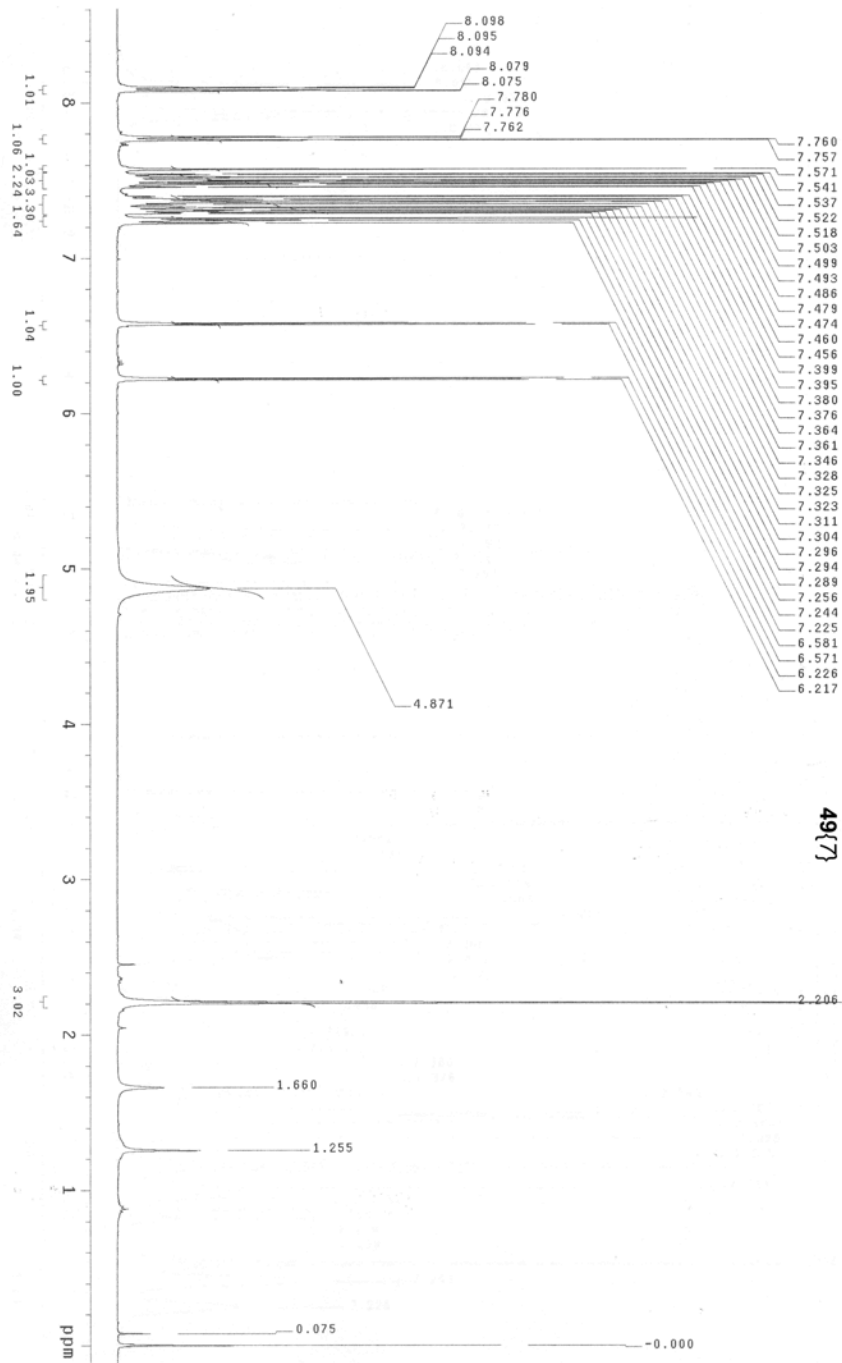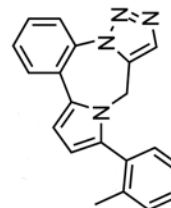



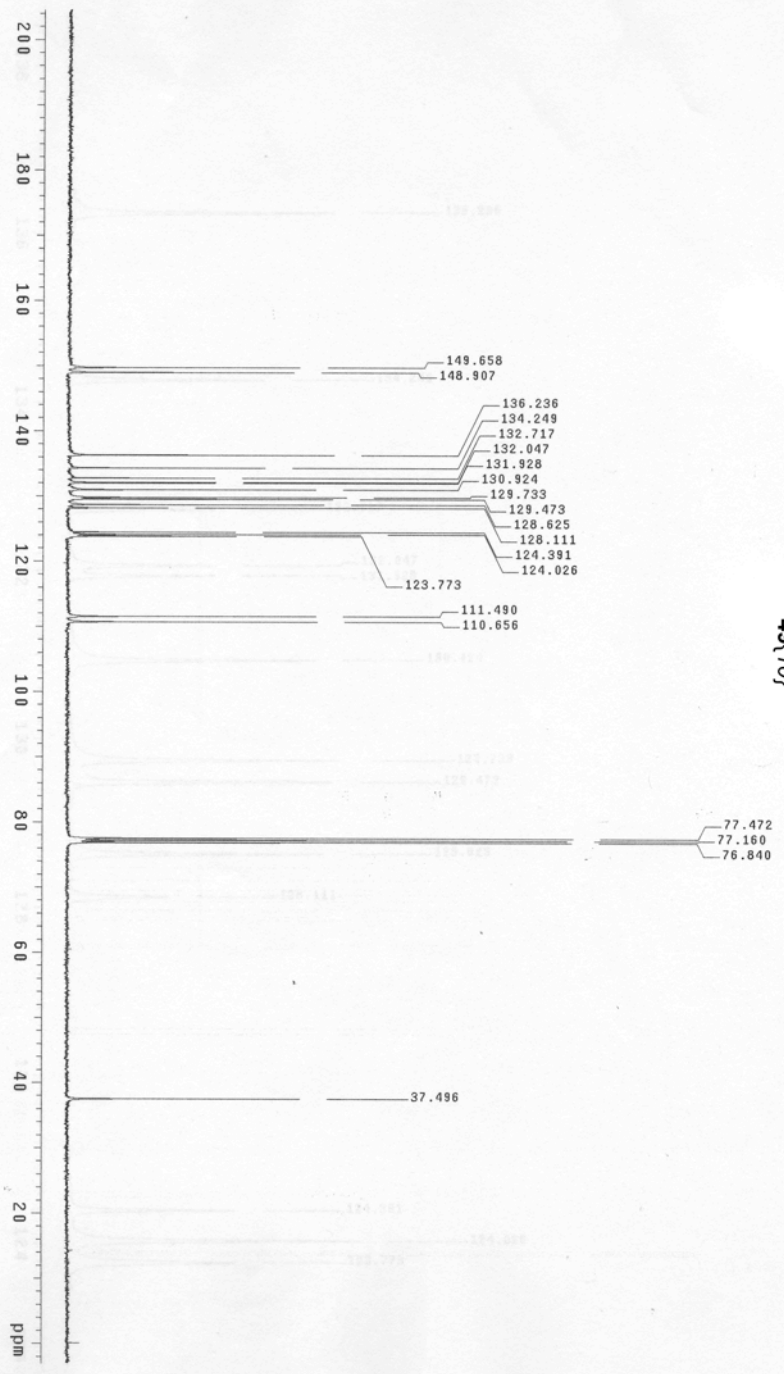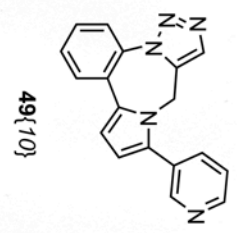

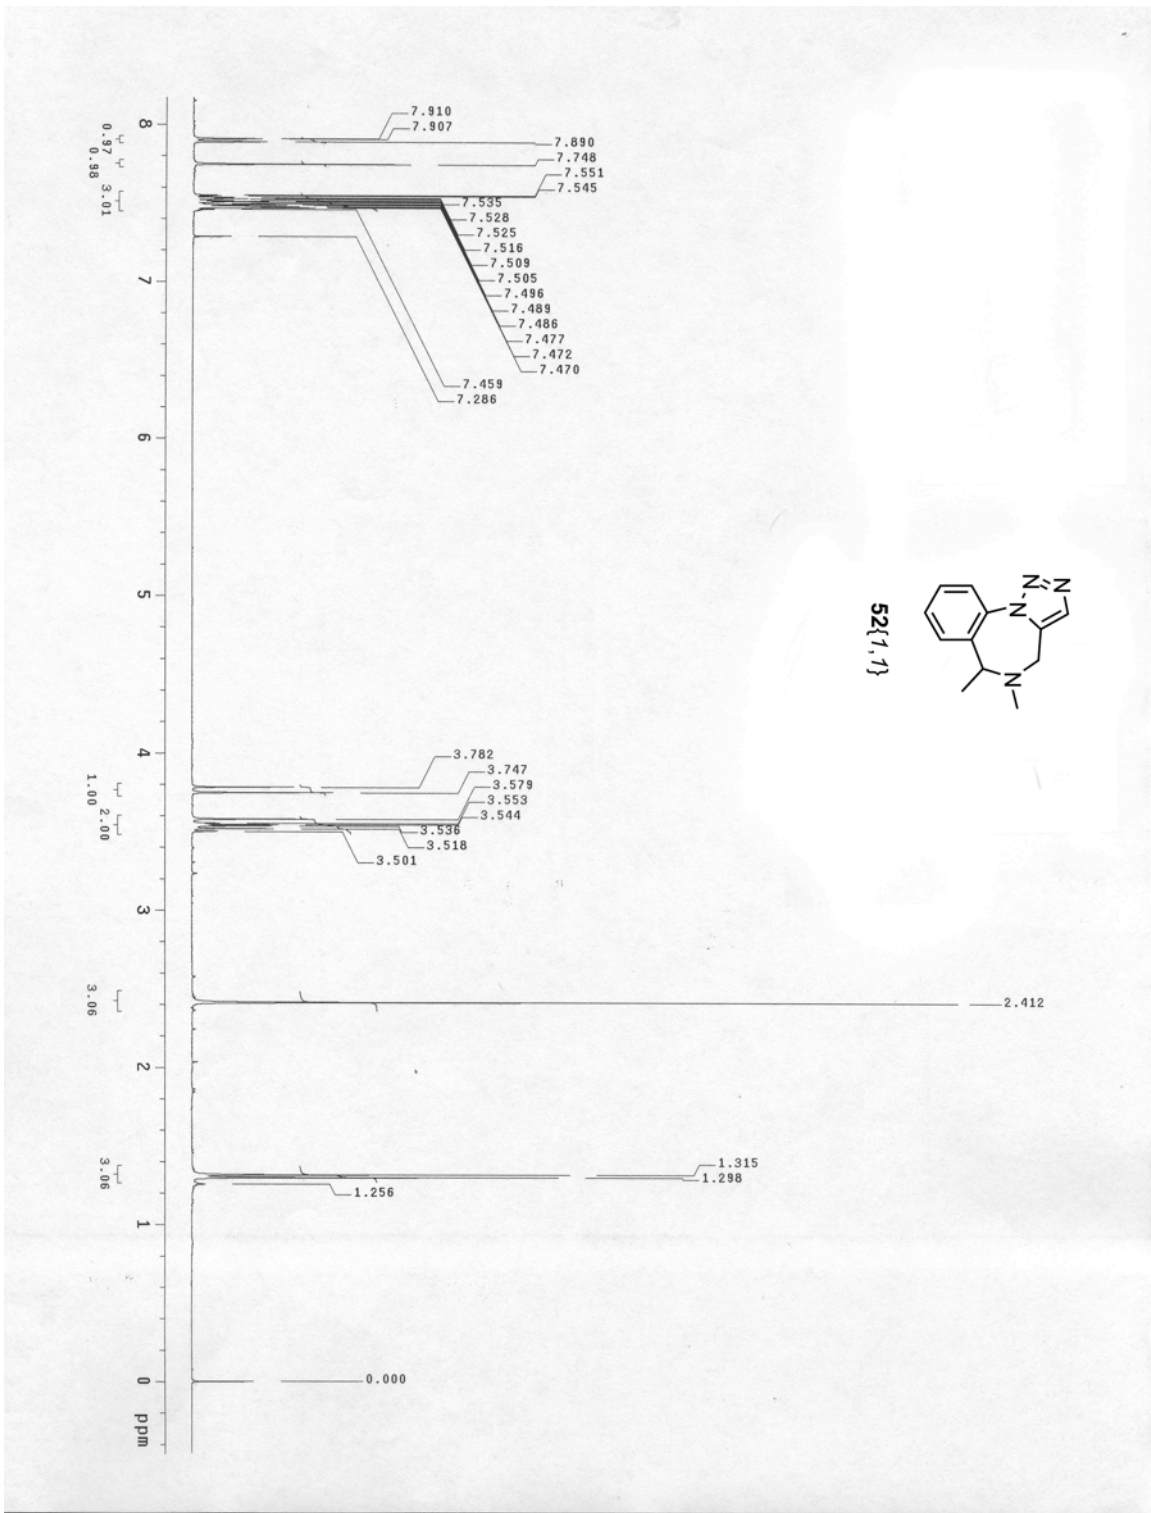



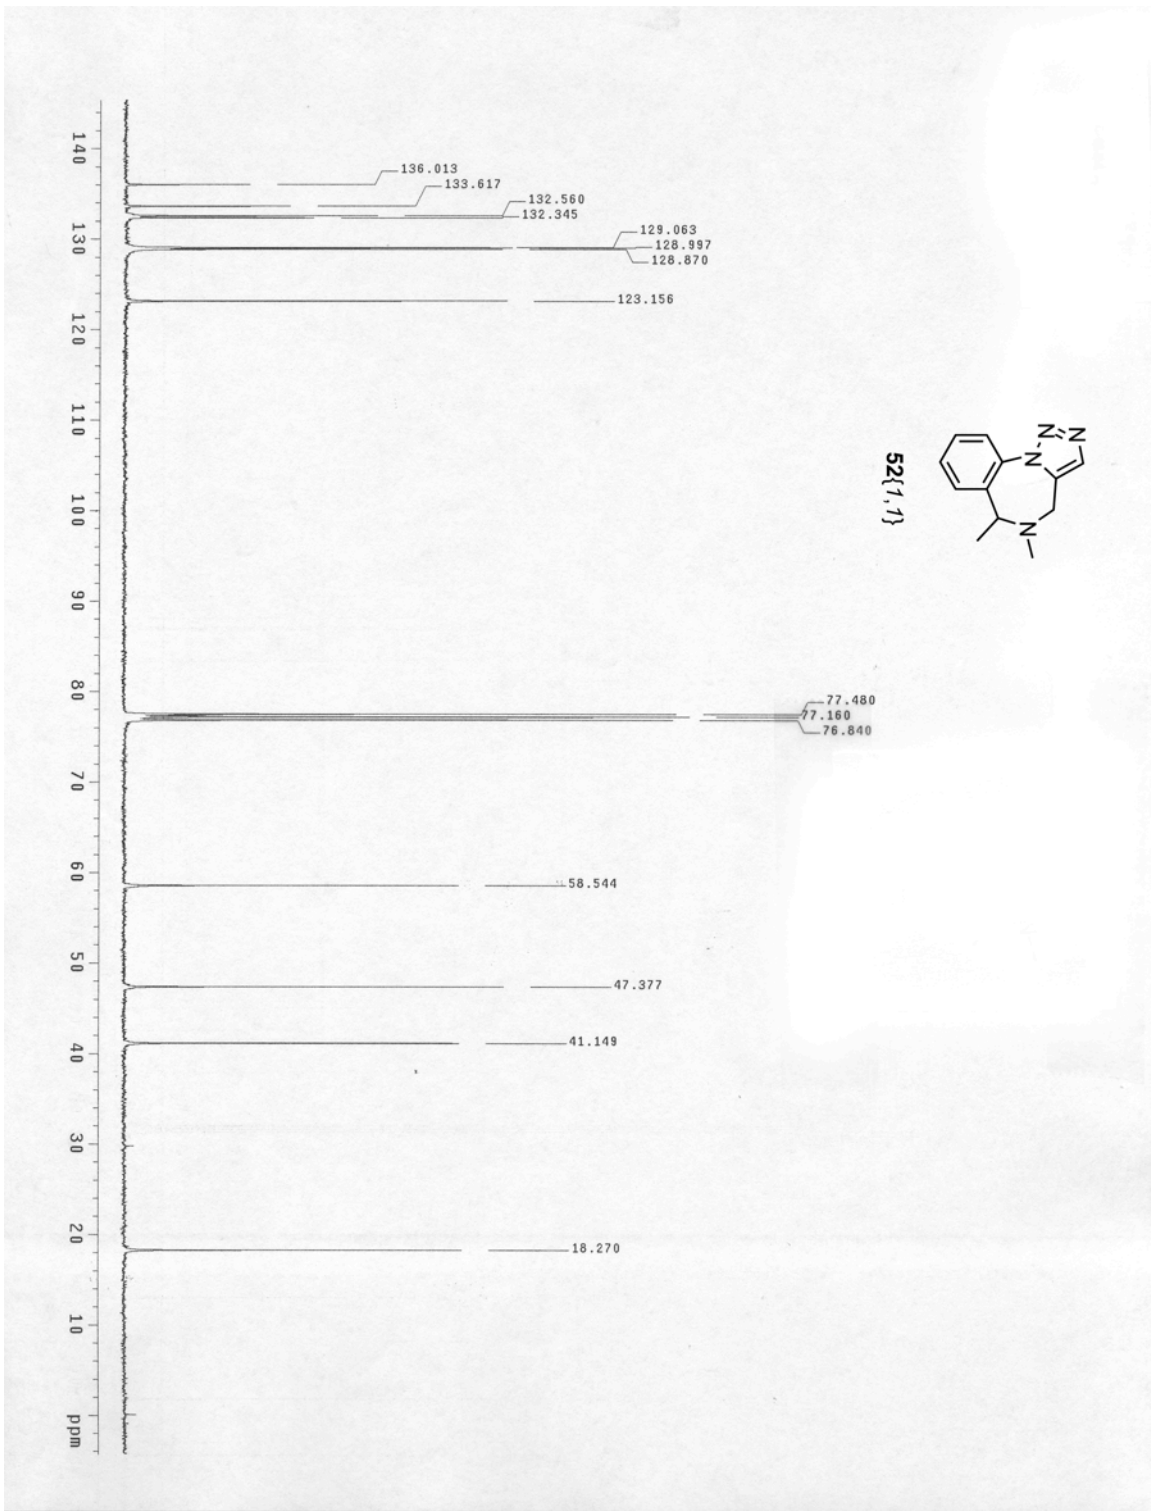

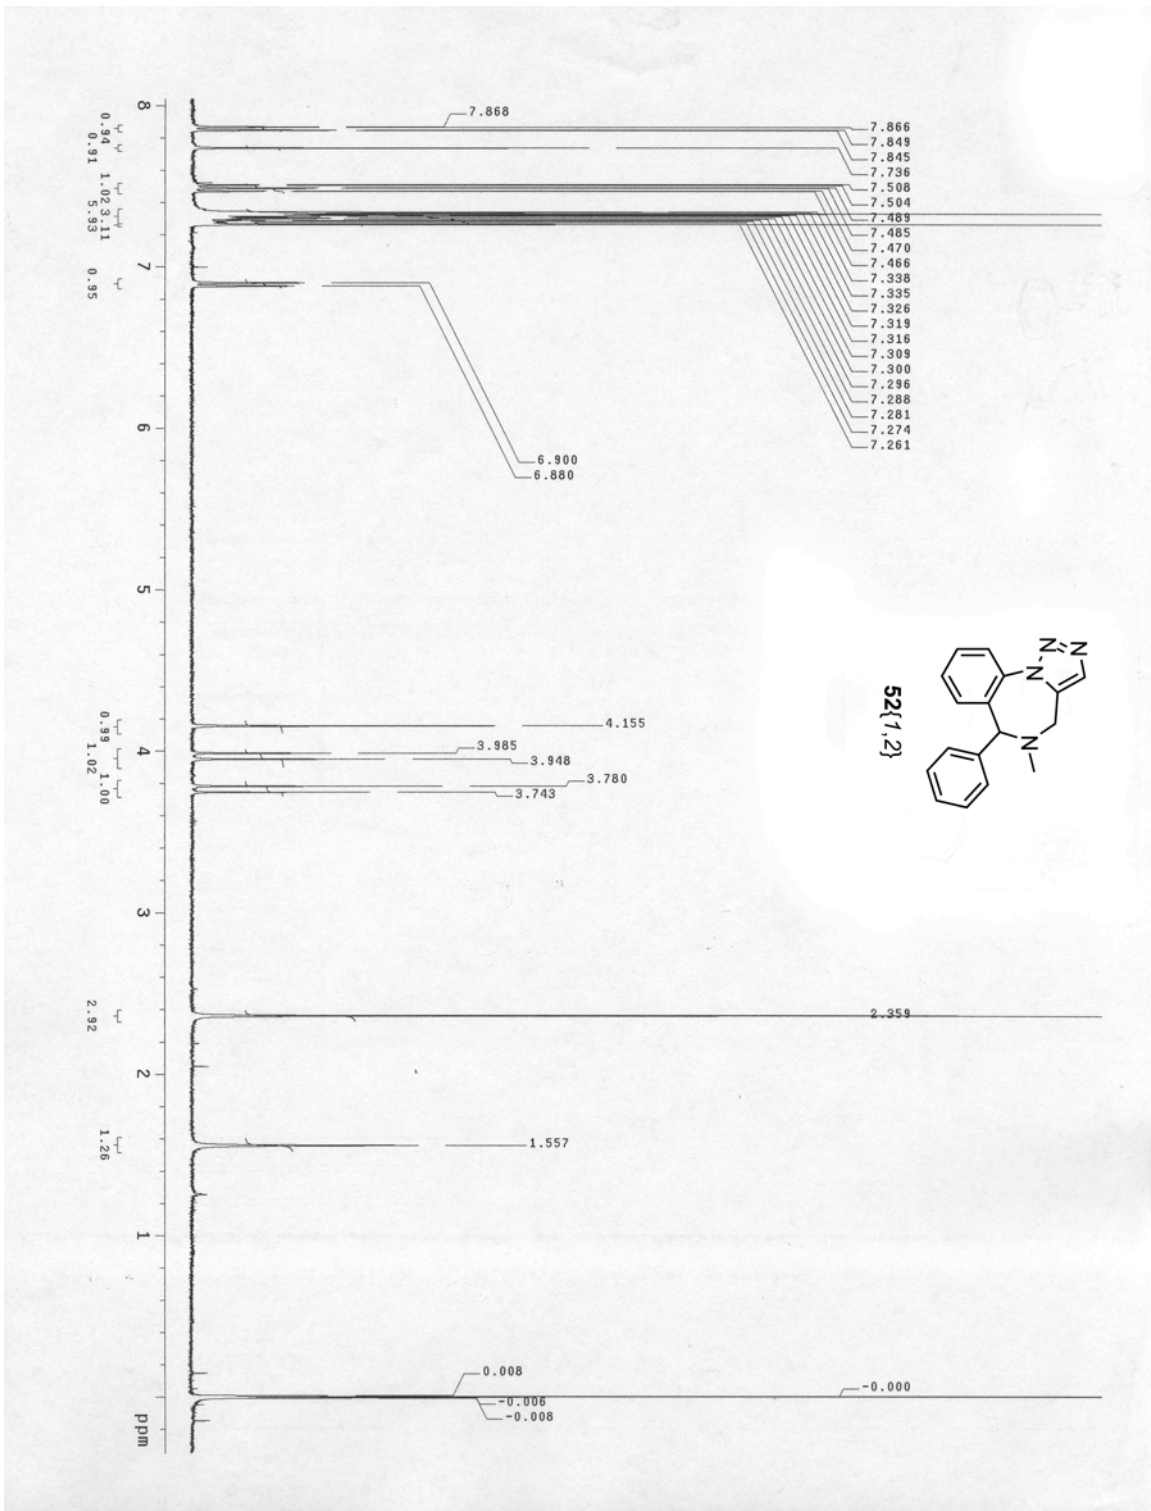

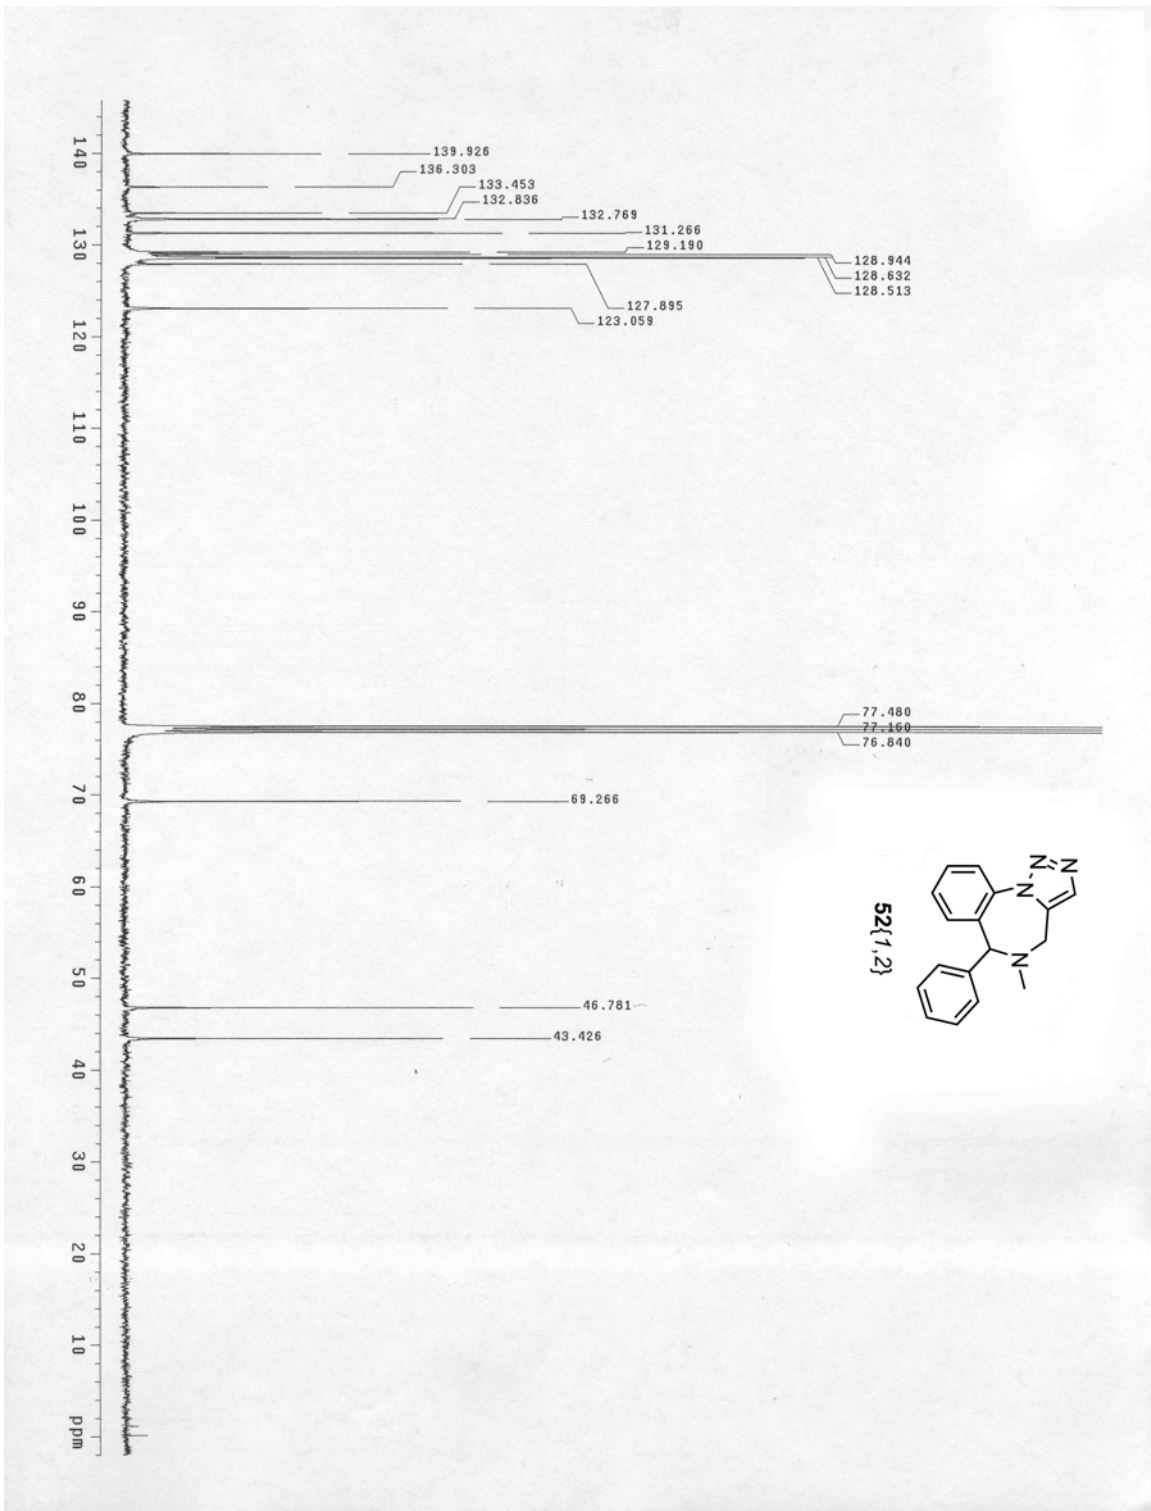

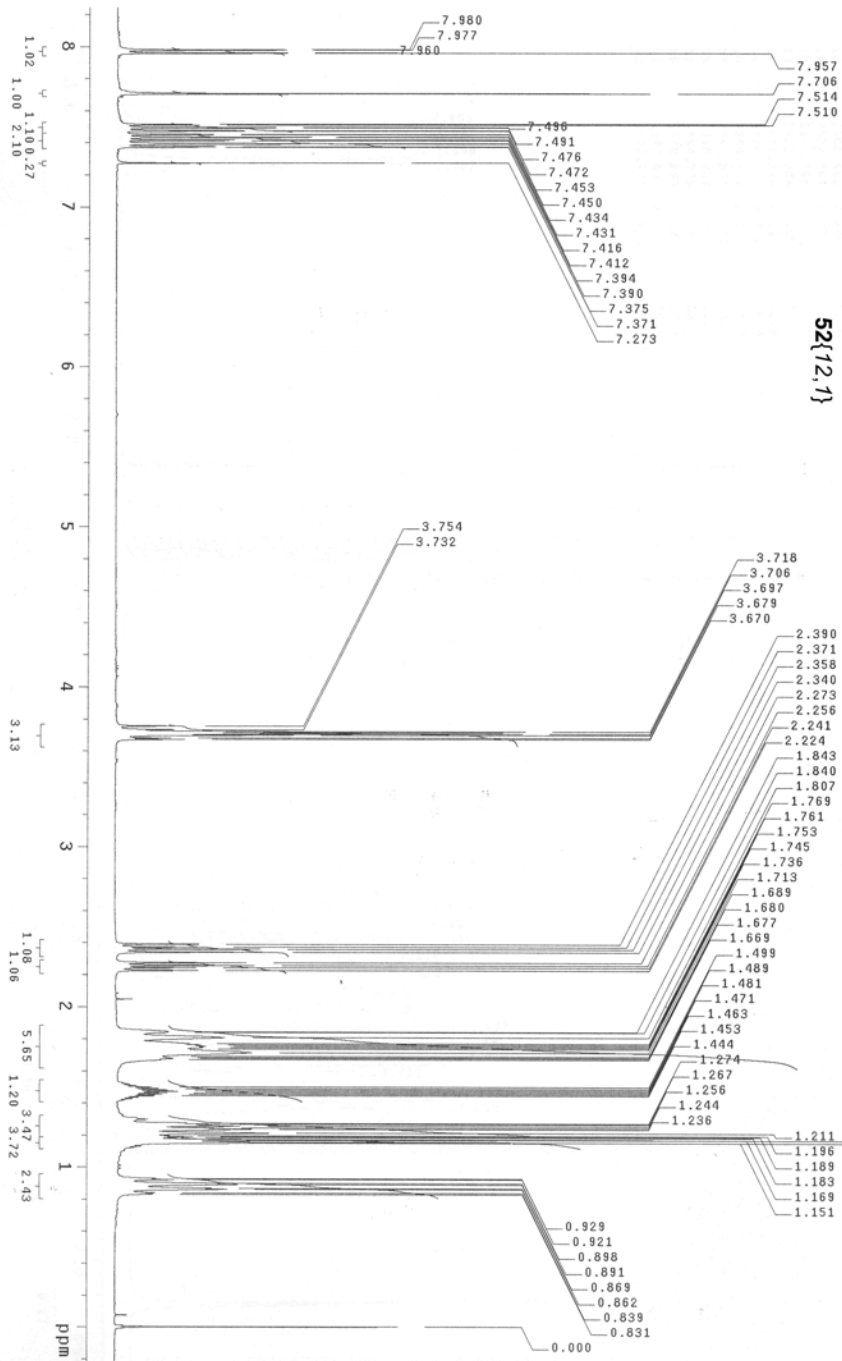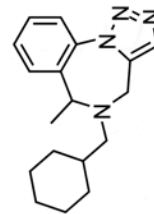

52(12,1)

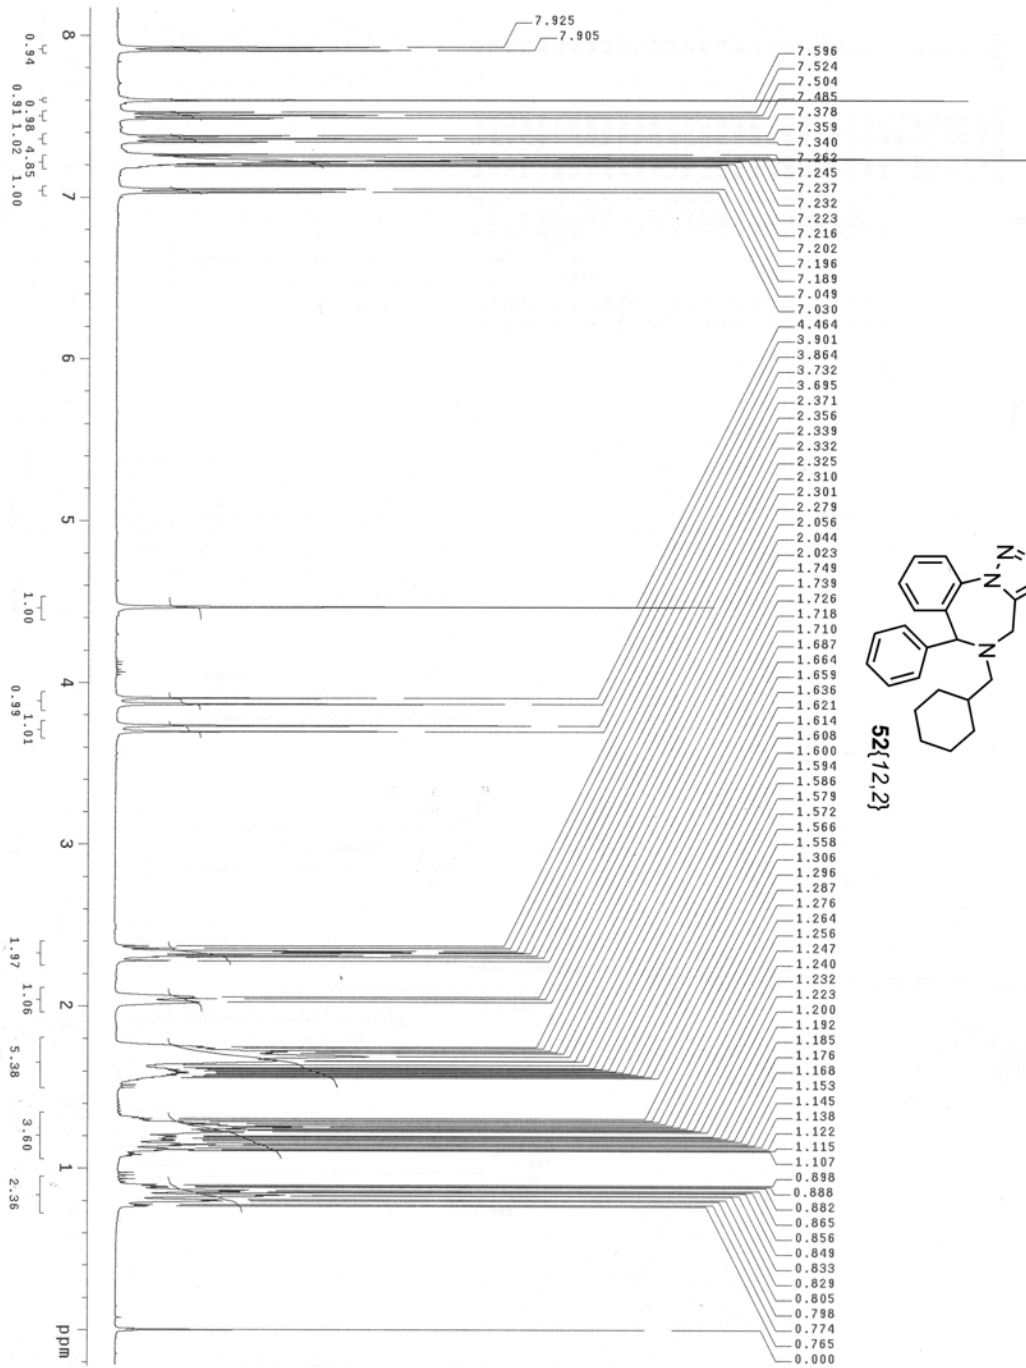

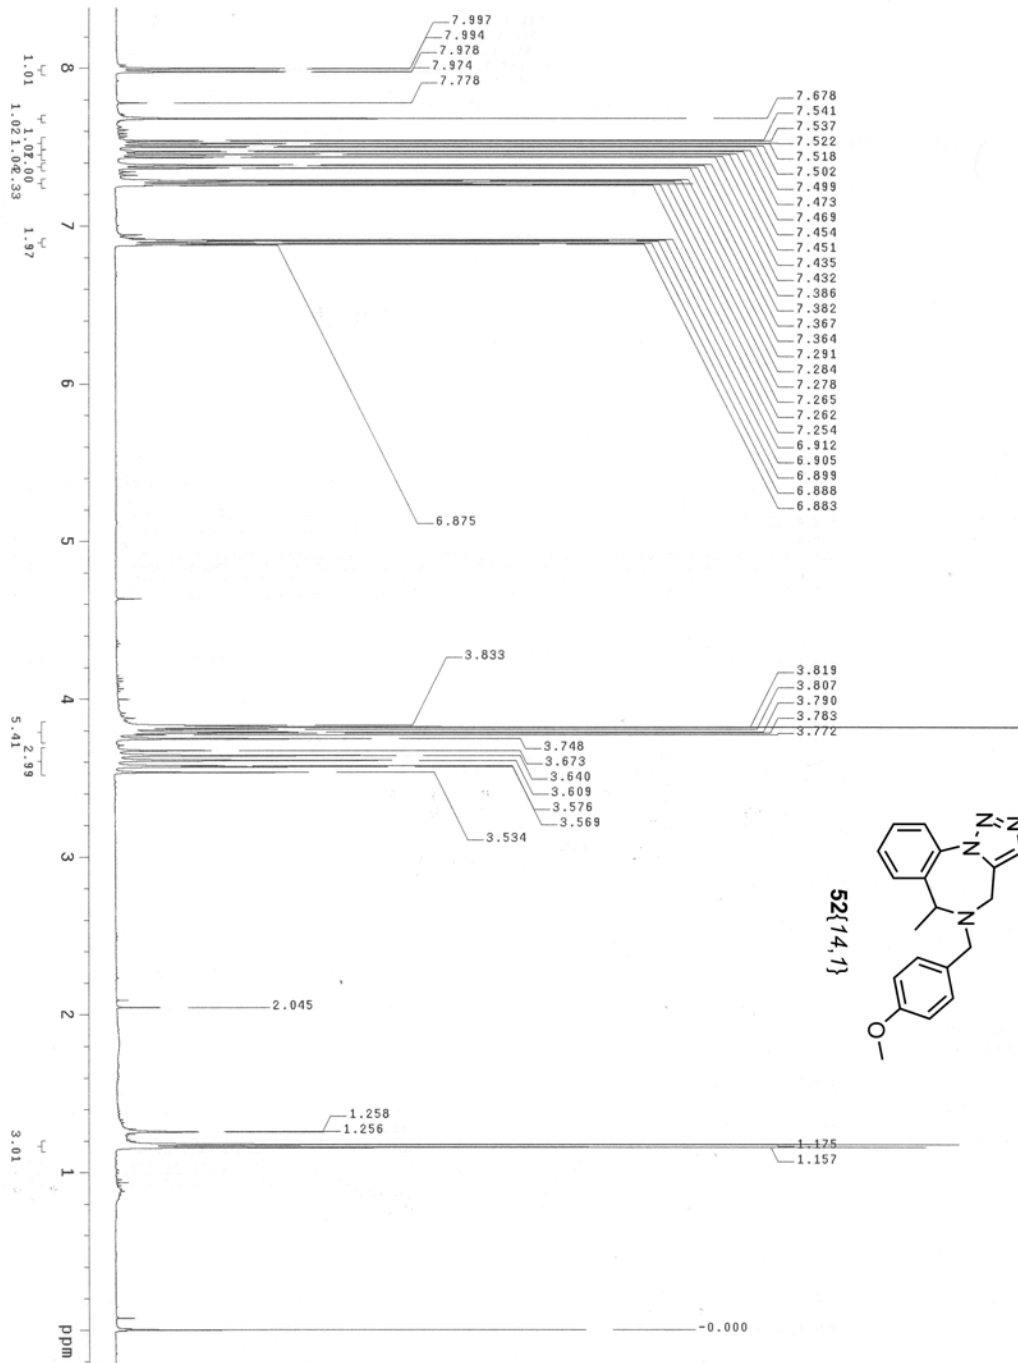

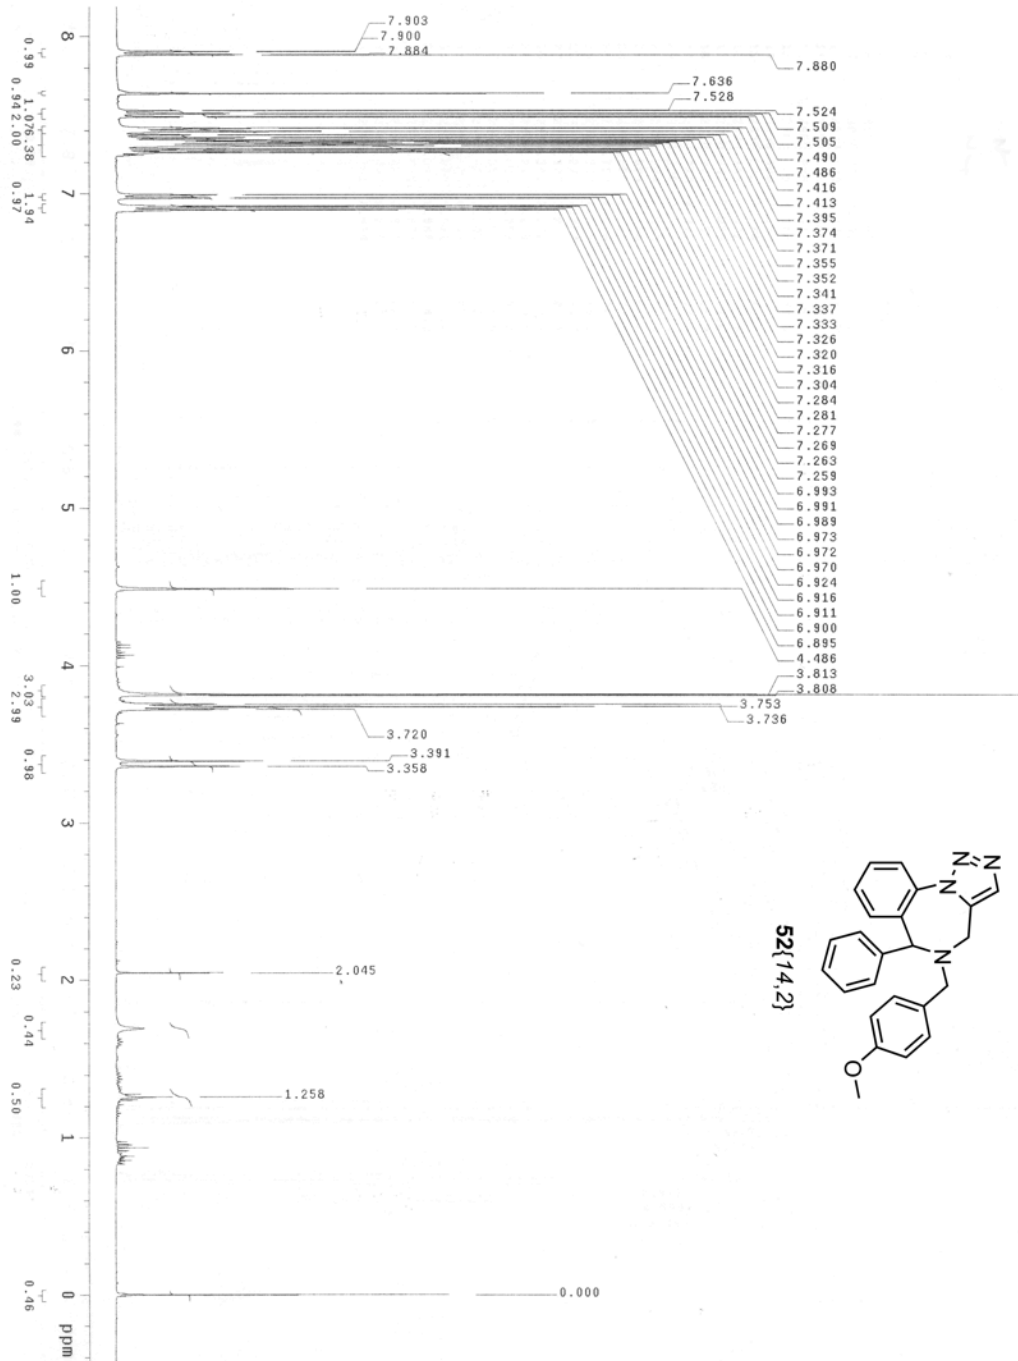

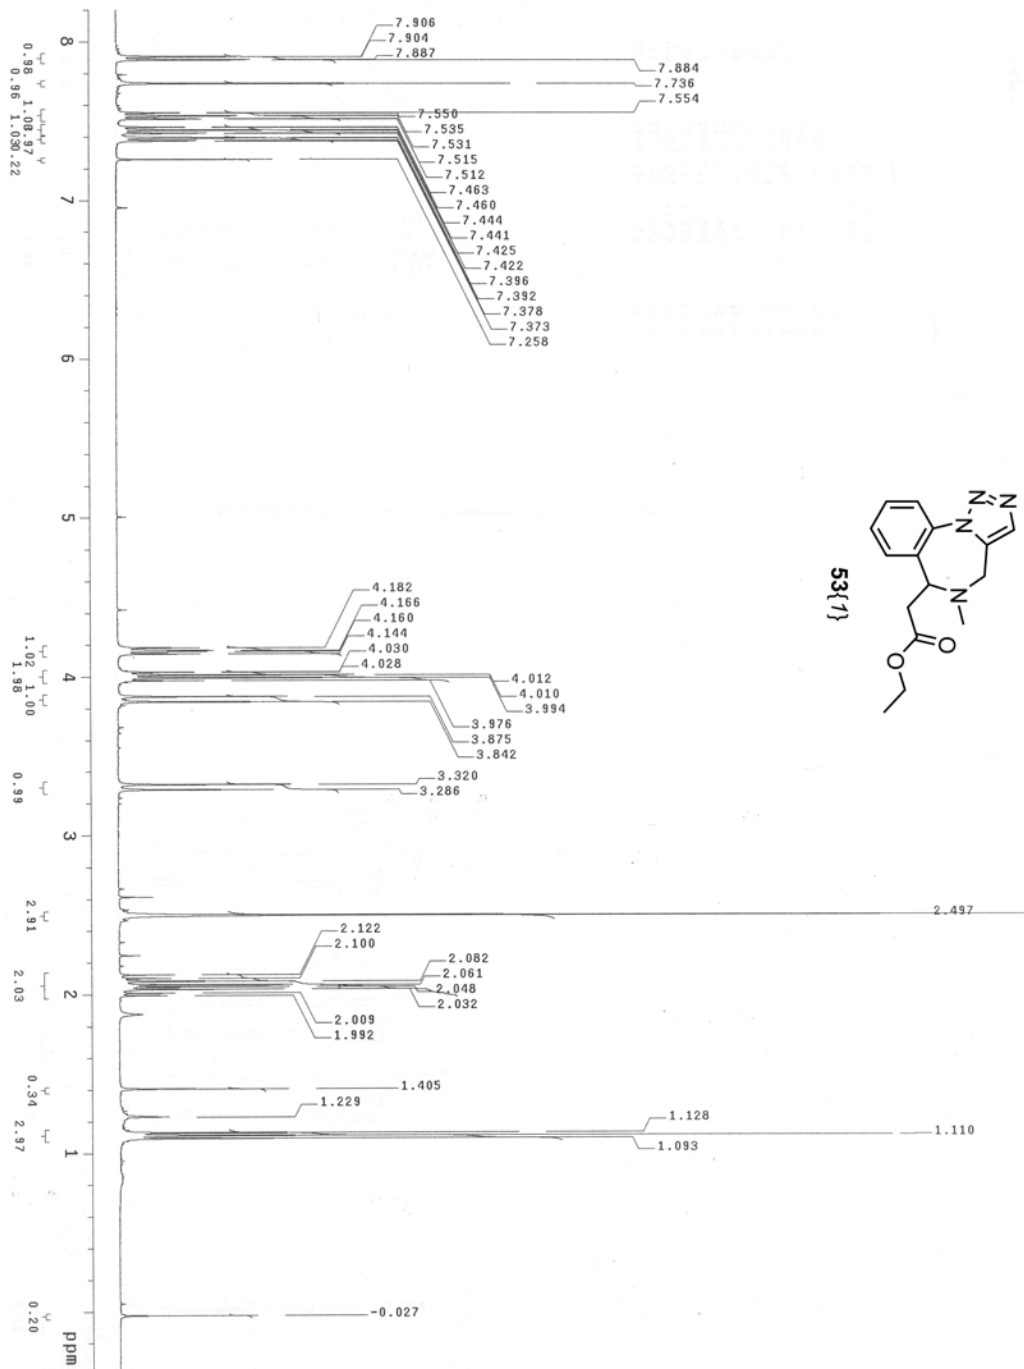



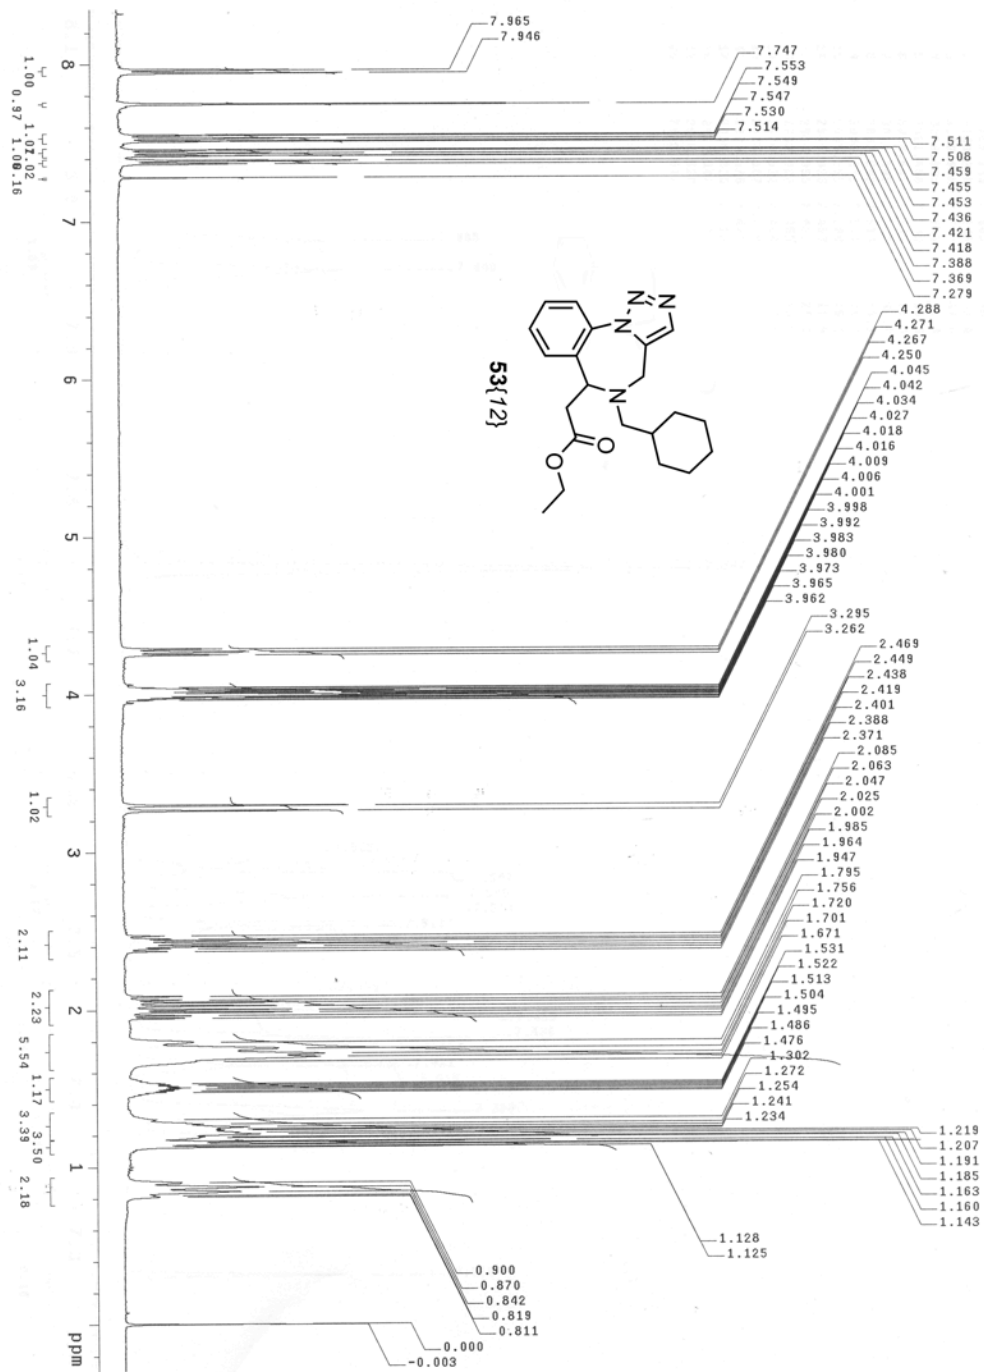

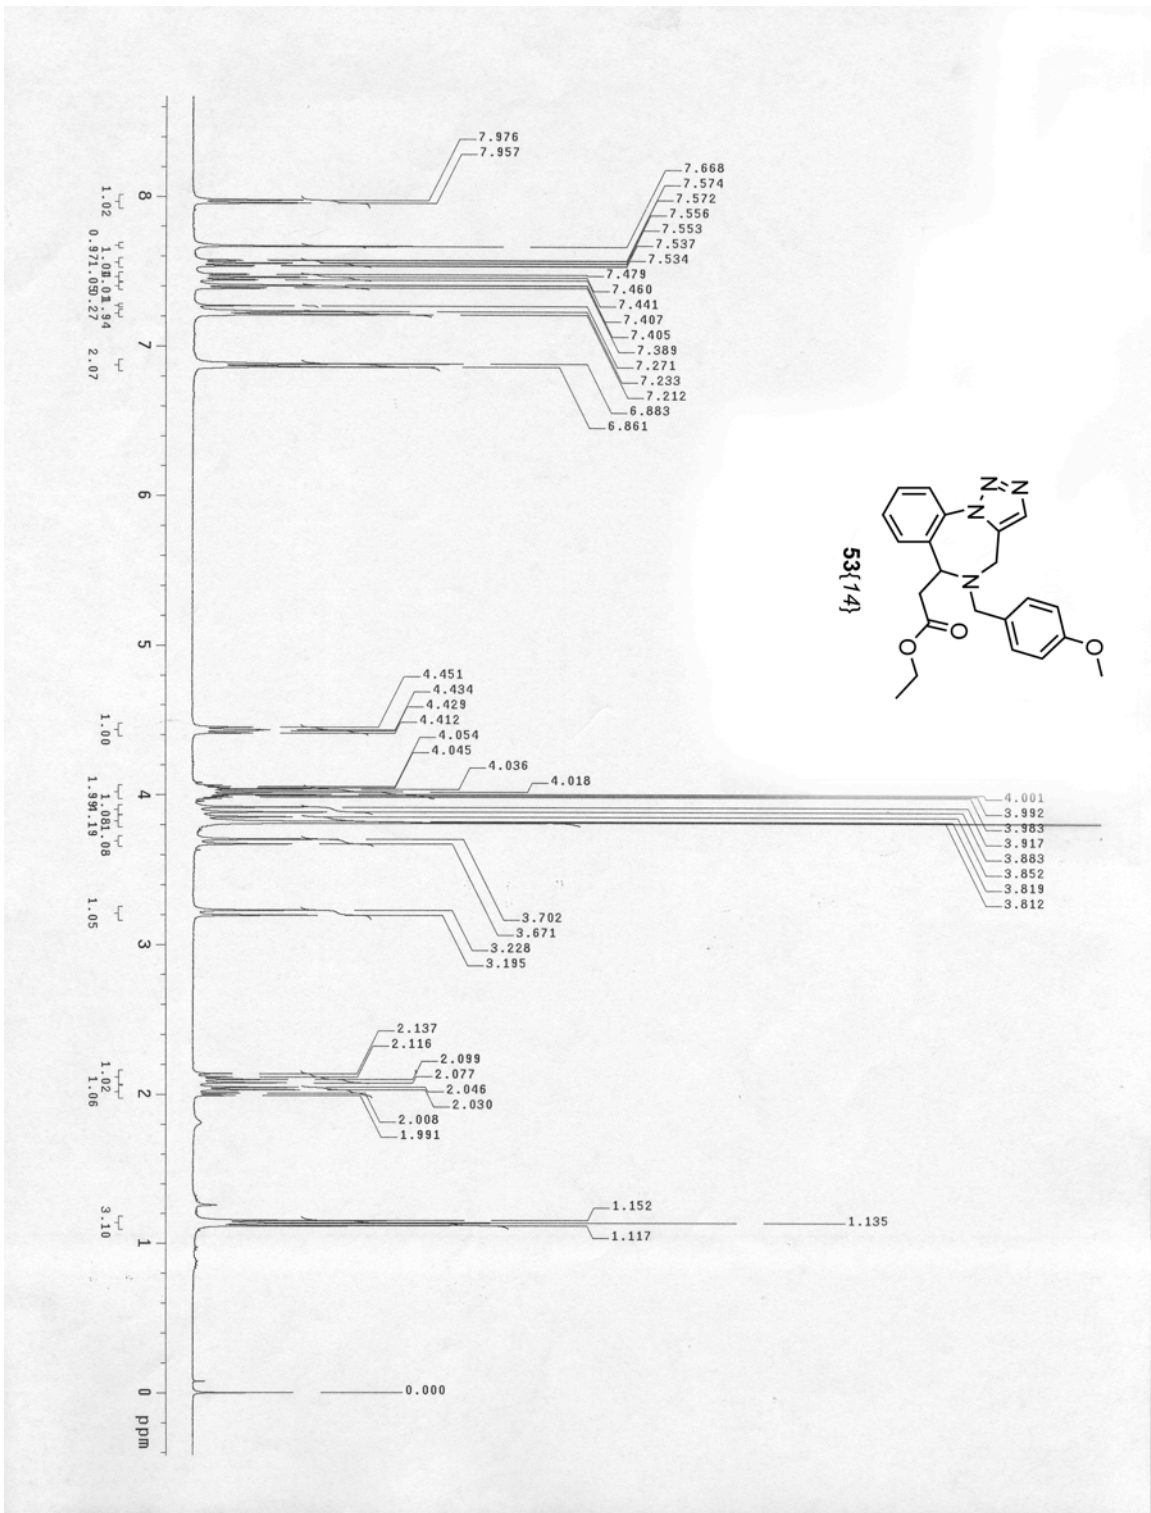

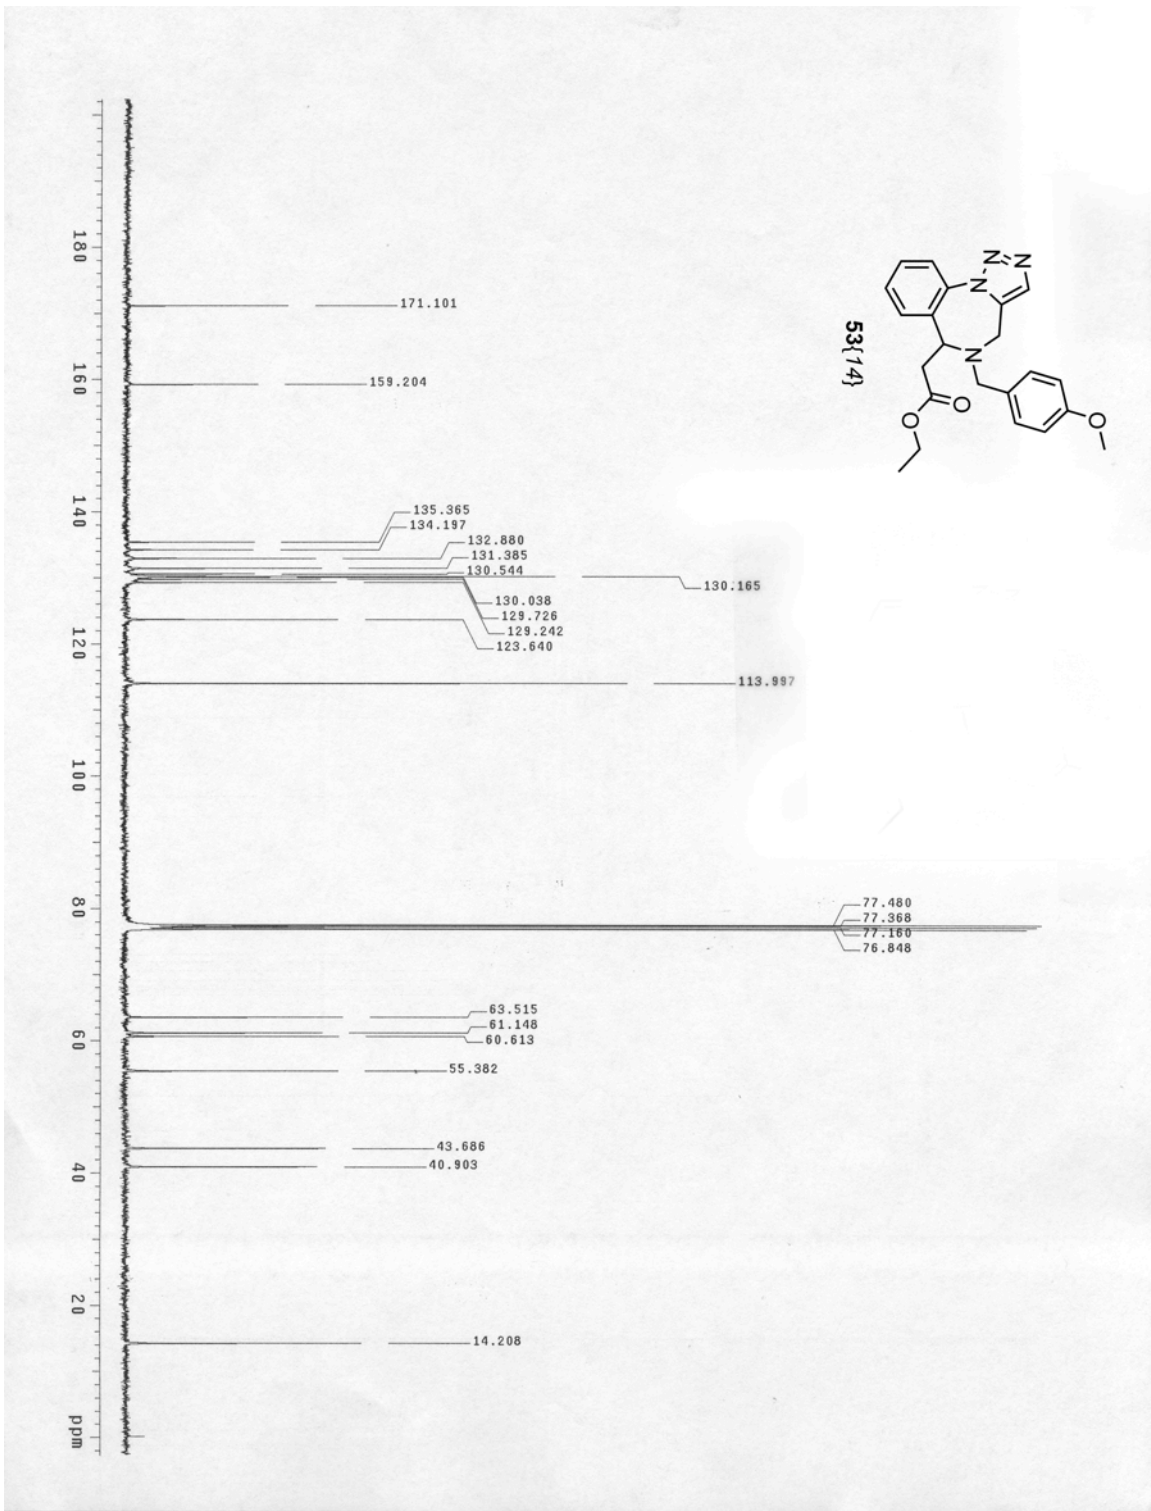

Supplement: NIHMS354249-supplement-1_si_001.pdf [file NIHMS354249-supplement-1_si_001.pdf]
